# Supplementary material
Source: PubMed Central journal article supplement (PMC4032193)

**Supporting information****Second generation steroidal 4-aminoquinolines are potent, dual-target inhibitors of the botulinum neurotoxin serotype A metalloprotease and *P. falciparum***

Milica Videnović,<sup>¶</sup> Dejan M. Opsenica,<sup>†,\*</sup> James C. Burnett,<sup>‡</sup> Laura Gomba,<sup>#</sup> Jonathan E. Nuss,<sup>#,v</sup> Života Selaković,<sup>¶</sup> Jelena Konstantinović,<sup>¥</sup> Maja Krstić,<sup>¶</sup> Sandra Šegan,<sup>†</sup> Mario Zlatović,<sup>¶</sup> Richard J. Sciotti,<sup>v</sup> Sina Bavari,<sup>§,\*</sup> and Bogdan A. Šolaja<sup>¶,\*</sup>

<sup>¶</sup>Faculty of Chemistry, University of Belgrade, Studentski trg 16, P.O. Box 51, 11158, Belgrade, Serbia

<sup>†</sup>Institute of Chemistry, Technology, and Metallurgy, University of Belgrade, Njegoseva 12, 11000 Belgrade, Serbia

<sup>‡</sup>Computational Drug Development Group, Leidos Biomedical Research, Inc., FNLCR at Frederick, P.O. Box B, Frederick, MD, 21701, United States

<sup>#</sup>United States Army Medical Research Institute of Infectious Diseases, Department of Bacteriology, 1425 Porter Street, Frederick, MD 21702, United States

<sup>¥</sup>Faculty of Chemistry Innovative Centre, Studentski trg 12-16, 11158 Belgrade, Serbia

<sup>v</sup> Division of Experimental Therapeutics, Walter Reed Army Institute of Research, Silver Spring, Maryland 20910, United States

<sup>§</sup>Target Discovery and Experimental Microbiology, United States Army Medical Research Institute of Infectious Diseases, 1425 Porter Street, Frederick, MD 21702, United States

## Table of contents

|                                                 |            |
|-------------------------------------------------|------------|
| Table 1S                                        | S2         |
| Ligand interaction diagrams                     | S2 – S6    |
| Synthesis                                       | S6 – S39   |
| HPLC analyses for purity                        | S40 – S42  |
| HPLC purity chromatograms                       | S43 – S140 |
| <sup>1</sup> H- and <sup>13</sup> C-NMR spectra | S141-S190  |

**Table 1S. In vitro inhibitory activities of tested compounds against BoNT/A LC**

| Compound | % Inhibition (10 μM) |
|----------|----------------------|
| 10       | 72.95                |
| 62       | 97.09                |
| 63       | 99.00                |

## Ligand interaction diagrams

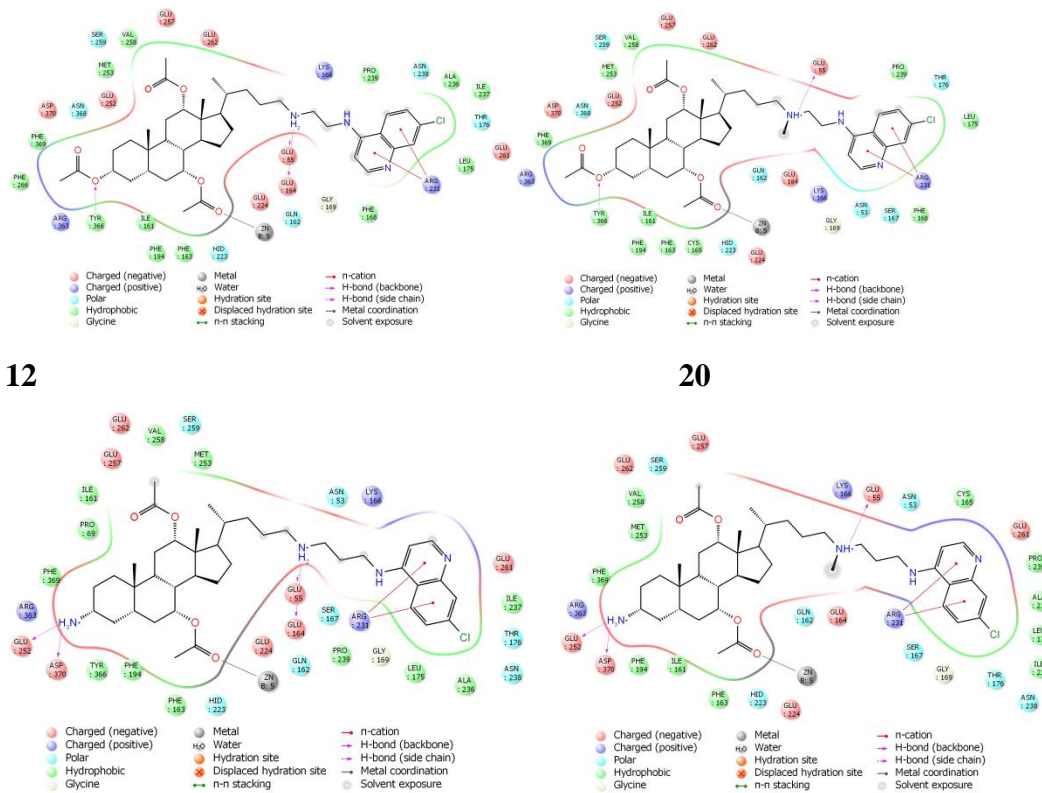

53

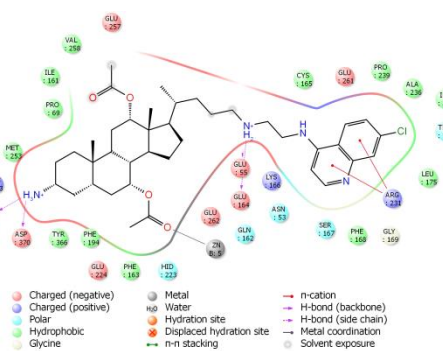

55

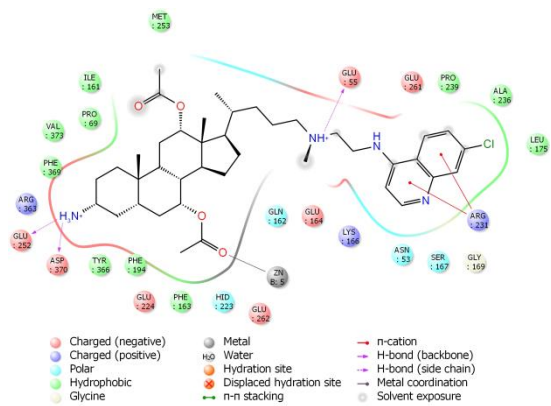

52

**Figure S1.** Ligand interaction diagrams for derivatives **12** (a), **20** (b), **53** (c) and **55** (d), (e) **52**, (f) **54**.

54

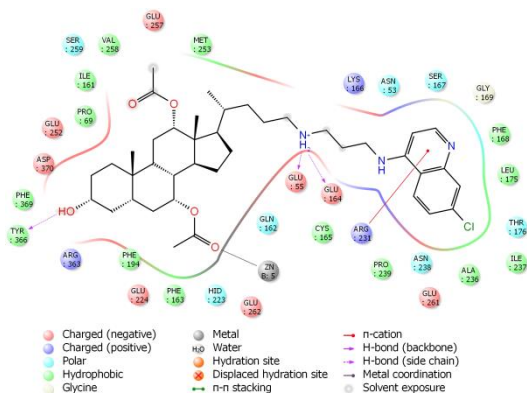

17

**Figure S2.** Ligand interaction diagrams for derivative **17**.

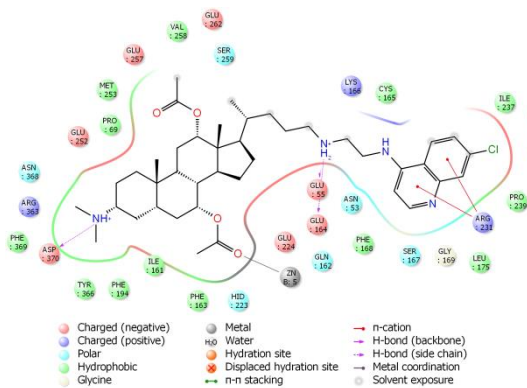

50

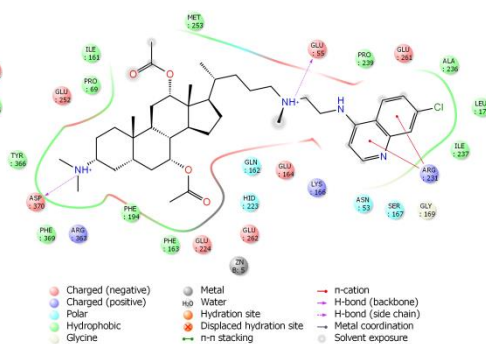

56

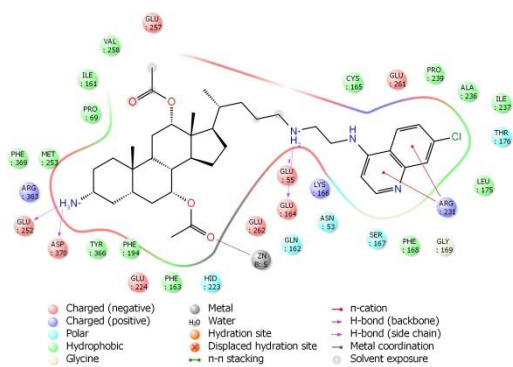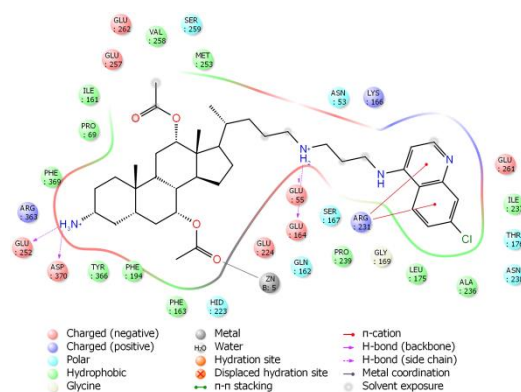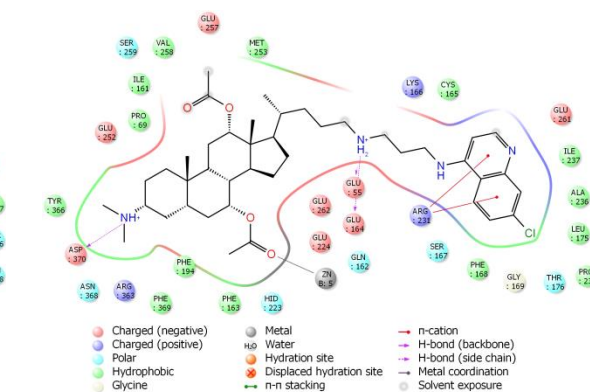

**Figure S3.** Ligand interaction diagrams for derivatives, **50**, **56** or **52**, **53**, and **51**.

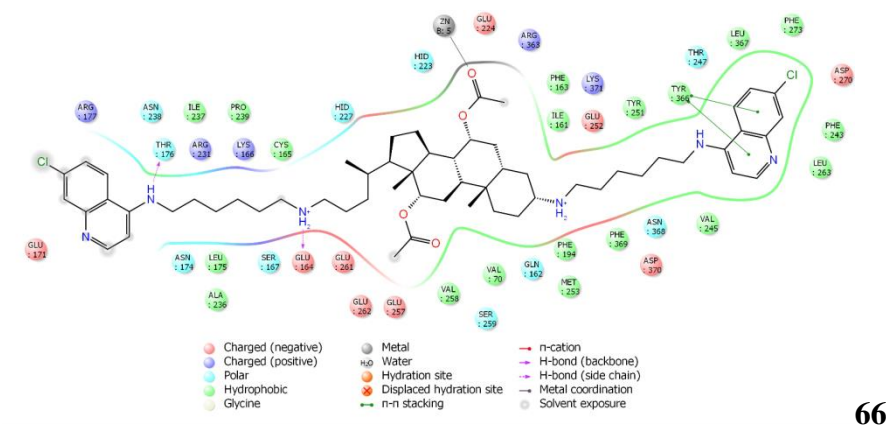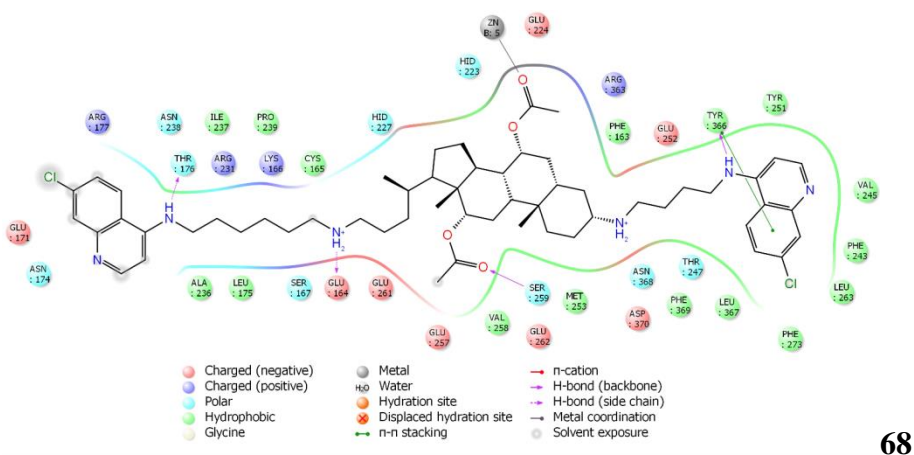

**Figure S4.** Ligand interaction diagrams for derivatives (a) **66** (b) **68**.

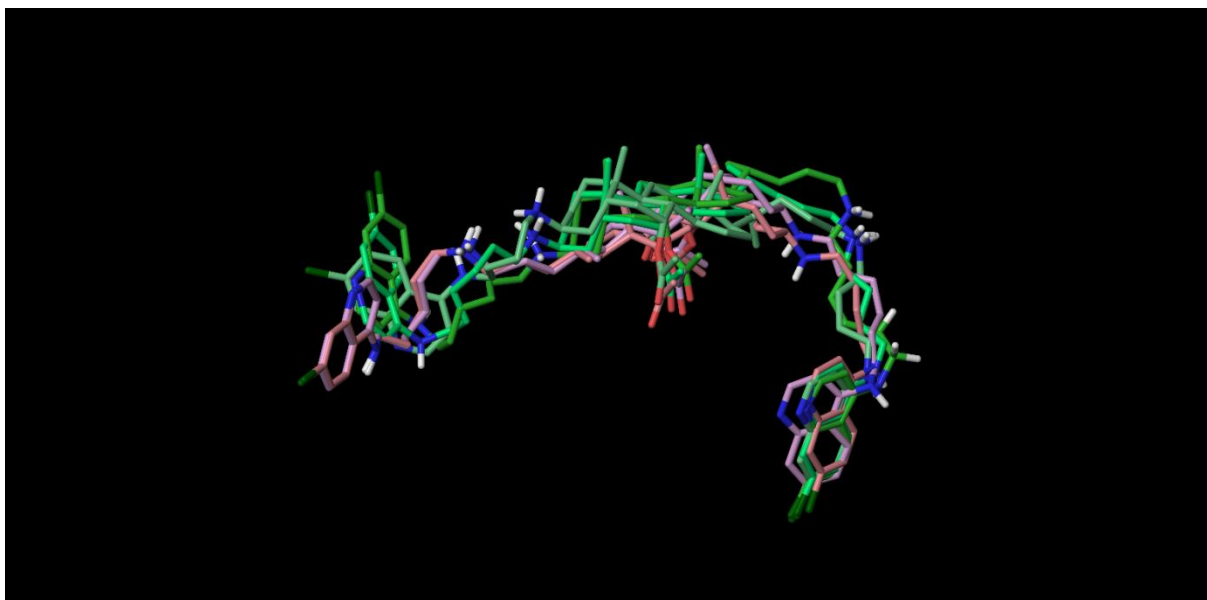

**Figure S5.** Overlapped docked structures of  $\alpha$ - and  $\beta$ -series of bis-ACQ derivatives.  $\alpha$ -Series (**66** and **68**) is in pink,  $\beta$ -series (**64**, **65** and **67**) is in green).

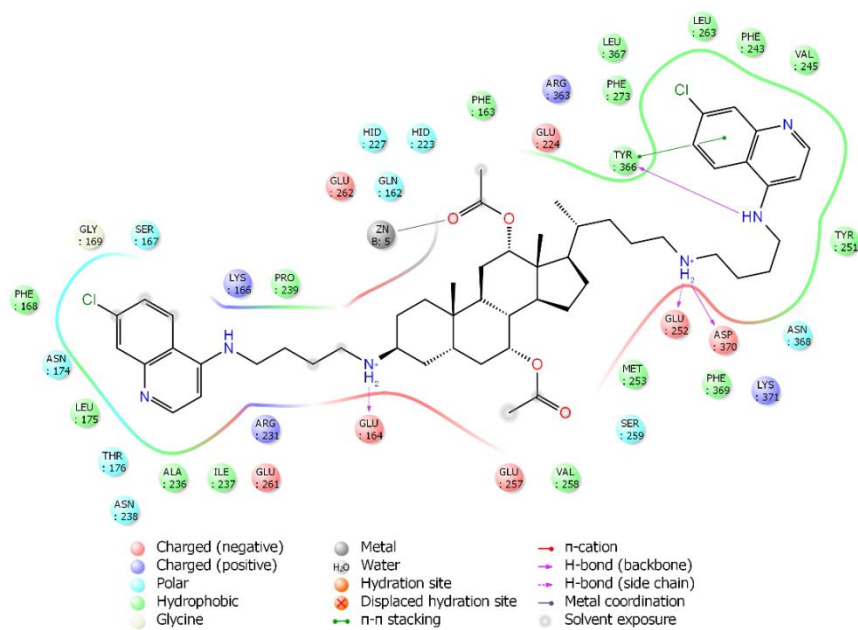

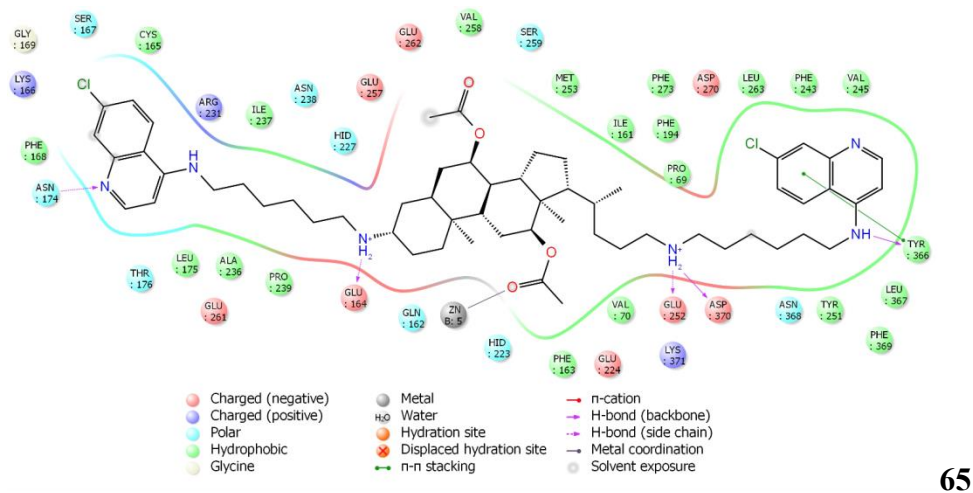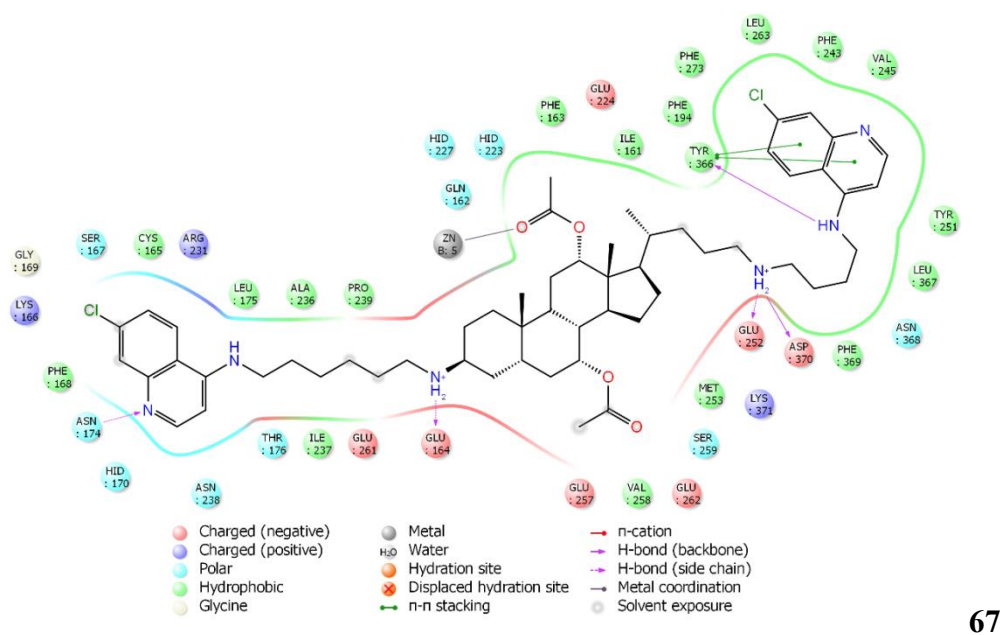

**Figure S6.** Ligand interaction diagrams for derivatives (a) **64**, (b) **65** and (c) **67**.

## Chemistry

### Synthesis

***N*-(3 $\alpha$ ,7 $\alpha$ ,12 $\alpha$ -Triacetoxy-5 $\beta$ -cholan-24-yl)-*N'*-(7'-chloroquinolin-4'-yl)-propane-1,3-diamine (**13**).** Compound **13** was obtained according to procedure described for **12**, using **11** (1.9 g, 3.65 mmol) and ACQ3 (1.99 g, 8.44 mmol). Yield 1.18g (44 %). Colorless foam softens at 91-95 °C.  $[\alpha]_D^{20} = +0.106$  ( $c = 2.0 \times 10^{-3}$  g/mL, DCM). IR (ATR): 2936w, 2866w,

1727s, 1610s, 1579s, 1535w, 1446w, 1365m, 1330w, 1232s, 1136w, 1021m, 964w, 938w, 882w, 820w, 803w  $\text{cm}^{-1}$ .  $^1\text{H}$  NMR (500 MHz,  $\text{CDCl}_3$ ,  $\delta$ ): 8.46 (*d*,  $J = 5.5$ , H-C(2')), 7.906 (*d*,  $J = 2.0$ , H-C(8')), 7.76 (*d*,  $J = 9.0$ , H-C(5')), 7.34, (*dd*,  $J_1 = 2.5$ ,  $J_2 = 9.0$ , H-C(6')), 6.29 (*d*,  $J = 5.5$ , H-C(3')), 5.11-5.10 (*m*, H-C(12)), 4.91-4.89 (*m*, H-C(7)), 4.62-4.40 (*m*, H-C(3)), 3.395 (*t*,  $J = 6.0$ , 2H-C(9')), 2.99-2.92 (*m*, 2H-C(11')), 2.82-2.62 (*m*, 2H-N, 2H-C(24)), 2.12 (*s*,  $\text{CH}_3\text{COO}$ ), 2.06 (*s*,  $\text{CH}_3\text{COO}$ ), 2.03 (*s*,  $\text{CH}_3\text{COO}$ ), 0.92 (*s*,  $\text{CH}_3\text{-C}(10)$ ), 0.85 (*d*,  $J = 6.5$ ,  $\text{CH}_3\text{-C}(20)$ ), 0.73 (*s*,  $\text{CH}_3\text{-C}(13)$ ).  $^{13}\text{C}$  NMR (125 MHz,  $\text{CDCl}_3$ ,  $\delta$ ): 170.54, 170.50, 170.39, 151.53, 150.76, 148.50, 134.87, 127.96, 124.82, 122.26, 117.45, 98.22, 75.43, 74.01, 70.61, 50.38, 49.28, 47.39, 45.04, 43.79, 43.55, 40.88, 37.69, 34.86, 34.57, 34.25, 33.24, 31.19, 28.98, 27.28, 26.87, 26.81, 26.09, 25.61, 22.74, 22.52, 21.48, 21.45, 21.39, 17.87, 12.23.

(+)ESI-HRMS ( $m/z$ ):  $[\text{M} + \text{H}]^+$  738.4226 (error -2.40 ppm). Combustion analysis for ( $\text{C}_{42}\text{H}_{60}\text{ClN}_3\text{O}_6 \times 1.5\text{H}_2\text{O}$ ): calculated C 65.91, H 8.30, N 5.49; found C 66.12, H 7.92, N 5.49.

HPLC purity: Method A: RT 2.092, area 98.69 %; method B: RT 8.698, area 95.46 %.

***N*-(3 $\alpha$ ,7 $\alpha$ ,12 $\alpha$ -Triacetoxy-5 $\beta$ -cholan-24-yl)-*N'*-(7'-chloroquinolin-4'-yl)-butane-1,4-diamine (14).** Alcohol **11** (2.11 g, 4.08 mmol) was dissolved in DCM (440 mL), PCC (1.32 g, 6.11 mmol) was added and mixture was stirred at r.t. for 6 h. Reaction mixture was filtered through short column of  $\text{SiO}_2$  (eluent DCM/EA = 9/1). Crude aldehyde was dissolved in dry MeOH (40 mL), ACQ4 (1.01 g; 4.06 mmol) was added and mixture was stirred overnight at r.t. followed by  $\text{NaBH}_4$  (307 mg, 8.12 mmol) added in one portion. After 5h solvent was removed under reduced pressure and the product was purified by column chromatography (dry flash,  $\text{SiO}_2$ , eluent EA/Hex gradient 1/1  $\rightarrow$  EA, EA/MeOH gradient 95/5  $\rightarrow$  1/1, MeOH). Yield 2.16 g (71%). Colorless foam softens at 80-83  $^\circ\text{C}$ .  $[\alpha]_{\text{D}}^{20} = +0.116$  ( $c = 1.4 \times 10^{-3}$  g/mL, DCM). IR (KBr): 3396w, 3304w, 2936s, 2866m, 1730s, 1610w, 1579s, 1536s, 1448w, 1370m, 1331w, 1245s, 1133w, 1068w, 1023w, 965w, 886w, 807w  $\text{cm}^{-1}$ .  $^1\text{H}$  NMR (500 MHz,

CDCl<sub>3</sub>, δ): 8.70 (*d*, *J* = 5.2 H-C(2')), 8.12 (*d*, *J* = 2.1, H-C(8')), 7.93 (*d*, *J* = 8.8, H-C(5')), 7.50, (*dd*, *J*<sub>1</sub> = 8.9, *J*<sub>2</sub> = 2.1, H-C(6')), 6.55 (*d*, *J* = 5.2, H-C(3')), 6.28 (*bs*, H-N), 5.28 (*bs*, H-C(12)), 5.13-5.08 (*m*, H-C(7)), 4.82-4.73 (*m*, H-C(3)), 3.49 (*t*, *J* = 6.6, 2H-C(9')), 2.91 (*t*, *J* = 6.7, 2H-C(12')), 2.85-2.73 (*m*, 2H-C(24)), 2.31 (*s*, CH<sub>3</sub>COO), 2.27 (*s*, CH<sub>3</sub>COO), 2.24 (*s*, CH<sub>3</sub>COO), 1.11 (*s*, CH<sub>3</sub>-C(10)), 1.02 (*d*, *J* = 6.4, CH<sub>3</sub>-C(20)), 0.91 (*s*, CH<sub>3</sub>-C(13)). <sup>13</sup>C NMR (125 MHz, CDCl<sub>3</sub>, δ): 170.49, 170.33, 151.98, 150.00, 149.08, 134.68, 128.58, 124.88, 121.47, 117.30, 98.80, 75.40, 74.04, 70.67, 50.40, 49.03, 47.55, 44.99, 43.36, 43.11, 40.89, 37.71, 34.92, 34.65, 34.28, 33.32, 31.22, 28.86, 27.63, 27.25, 27.14, 26.84, 26.33, 26.20, 25.53, 22.77, 22.51, 21.55, 21.44, 21.39, 17.87, 12.19. (+)ESI-HRMS (*m/z*): [M + 2H]<sup>2+</sup> 376.72256 (error -2.85 ppm), [M + H]<sup>+</sup> 752.43999 (error -4.73 ppm); Combustion analysis for (C<sub>43</sub>H<sub>62</sub>ClN<sub>3</sub>O<sub>6</sub>×3H<sub>2</sub>O): calculated C 64.04, H 8.50, N 5.21; found C 64.43, H 8.27, N 5.13. HPLC purity: Method A: RT 1.900, area 98.59 %; method C: RT 10.694, area 99.15%.

***N*-(3*α*,7*α*,12*α*-Triacetoxy-5*β*-cholan-24-yl)-*N'*-(7'-chloroquinolin-4'-yl)-hexane-1,6-diamine (15).** Aldehyde was obtained according to procedure described for **14**, using **11** (1.30 g, 2.49 mmol) and PCC (807 mg, 3.74 mmol). Reductive amination was performed using ACQ6 (614 mg, 2.21 mmol) and NaBH<sub>4</sub> (170 mg, 4.50 mmol). Crude product was purified by column chromatography (dry flash, SiO<sub>2</sub>, eluent EA/Hex gradient 1/1 → 8/2, EA, EA/MeOH gradient 9/1 → 1/9, MeOH). Yield 814 mg (42%). colorless foam softens at 74-76 °C. [α]<sub>D</sub><sup>20</sup> = +0.089 (c = 1.3×10<sup>-3</sup> g/mL, DCM). IR (KBr): 2931w, 2862w, 1728s, 1609w, 1577s, 1536w, 1447m, 1367m, 1330w, 1235s, 1133w, 1070w, 1021m, 964w, 938w, 886w, 849w, 805w cm<sup>-1</sup>. <sup>1</sup>H NMR (500 MHz, CDCl<sub>3</sub>, δ): 8.52 (*d*, *J* = 5.4 H-C(2')), 7.95 (*d*, *J* = 2.2, H-C(8')), 7.69 (*d*, *J* = 9.0, H-C(5')), 7.35, (*dd*, *J*<sub>1</sub> = 2.1, *J*<sub>2</sub> = 8.9, H-C(6')), 6.40 (*d*, *J* = 5.4, H-C(3')), 5.12 (*bs*, H-N, exchangeable with D<sub>2</sub>O), 5.08 (*bs*, H-C(12)), 4.91-4.90 (*m*, H-C(7)), 4.60-4.50 (*m*, H-C(3)), 3.40-3.20 (*m*, 2H-C(9')), 2.70-2.50 (*m*, 2H-C(14') and 2H-C(24)),



2.13 (*s*, CH<sub>3</sub>COO), 2.08 (*s*, CH<sub>3</sub>COO), 2.07 (*s*, CH<sub>3</sub>COO), 0.91 (*s*, CH<sub>3</sub>-C(10)), 0.82 (*d*, *J* = 6.5, CH<sub>3</sub>-C(20)), 0.71 (*s*, CH<sub>3</sub>-C(13)). <sup>13</sup>C NMR (125 MHz, CDCl<sub>3</sub>, δ): 170.49, 170.35, 151.99, 149.71, 149.09, 134.78, 128.77, 125.18, 120.91, 117.10, 99.00, 75.43, 74.06, 70.69, 50.27, 49.61, 47.46, 44.98, 43.36, 43.11, 40.91, 37.72, 34.83, 34.67, 34.58, 34.30, 33.26, 31.24, 29.59, 28.86, 28.70, 27.23, 26.99, 26.94, 26.86, 26.06, 25.54, 22.78, 22.52, 21.57, 21.45, 21.40, 17.87, 12.18. (+)ESI-HRMS (*m/z*):[M + 2H]<sup>2+</sup> 390.7382 (error -2.89 ppm), ; [M + H]<sup>+</sup> 780.4713 (error -3.76 ppm); Combustion analysis for (C<sub>45</sub>H<sub>66</sub>ClN<sub>3</sub>O<sub>6</sub>×1.5H<sub>2</sub>O): calculated C 66.93, H 8.61, N 5.20; found C 66.59, H 8.31, N 5.13. HPLC purity: Method A: RT 1.971, area 99.39 %; method C: RT 11.700, area 95.41 %.

***N*-(3α-Hydroxy-7α,12α-diacetoxy-5β-cholan-24-yl)-*N'*-(7'-chloroquinolin-4'-yl)-**

**propane-1,3-diamine (17).** Alcohol **17** was obtained according to procedure described for **16**, using **13** (727 mg, 0.24 mmol) and anh. K<sub>2</sub>CO<sub>3</sub> (241 mg, 0.43 mmol). Yield 626 mg (91%). Colorless foam softens at 110-114 °C. [ $\alpha$ ]<sub>D</sub><sup>20</sup> = +0.114 (*c* = 2.0×10<sup>-3</sup> g/mL, DCM). IR (ATR): 3249w, 2930m, 2863m, 1714m, 1610s, 1577s, 1540m, 1433m, 1372s, 1330w, 1240s, 1138w, 1114w, 1073m, 1019m, 966w, 902w, 853w, 803w cm<sup>-1</sup>. <sup>1</sup>H NMR (200 MHz, CDCl<sub>3</sub>, δ): 8.47 (*d*, *J* = 5.6, H-C(2')), 7.92 (*d*, *J* = 2.2, H-C(8')), 7.80 (*bs*, H-N), 7.73 (*d*, *J* = 9.0, H-C(5')), 7.32 (*dd*, *J*<sub>1</sub> = 2.0, *J*<sub>2</sub> = 8.7, H-C(6')), 6.30 (*d*, *J* = 5.6, H-C(3')), 5.11 (*bs*, H-C(12)), 4.95-4.85 (*m*, H-C(7)), 3.60-3.35 (*m*, H-C(3) and 2H-C(9')), 2.96-2.86 (*m*, 2H-C(11')), 2.70-2.58 (*m*, 2H-C(24)), 2.11 (*s*, CH<sub>3</sub>COO), 2.04 (*s*, CH<sub>3</sub>COO), 0.91 (*s*, CH<sub>3</sub>-C(10)), 0.86 (*d*, *J* = 6.2, CH<sub>3</sub>-C(20)), 0.73 (*s*, CH<sub>3</sub>-C(13)). <sup>13</sup>C NMR (50 MHz, CDCl<sub>3</sub>, δ): 170.69, 151.94, 150.59, 148.94, 134.64, 128.29, 124.70, 122.12, 117.51, 98.21, 75.43, 71.50, 70.77, 50.49, 49.42, 47.50, 44.99, 43.88, 43.43, 40.95, 38.58, 37.67, 34.92, 34.80, 34.18, 33.30, 31.26, 30.41, 28.93, 27.24, 27.15, 26.57, 25.53, 22.69, 22.49, 21.52, 21.38, 17.85, 12.17. <sup>1</sup>H NMR (500 MHz, CDCl<sub>3</sub>, δ): 8.27 (*d*, *J* = 5.6, H-C(2')), 7.77-7.73 (*m*, H-C(8') and H-C(5')), 7.24

(*dd*,  $J_1 = 8.9$ ,  $J_2 = 2.1$ , H-C(6')), 6.25 (*d*,  $J = 5.6$ , H-C(3')), 5.00 (*bs*, H-C(12)), 4.81-4.77 (*m*, H-C(7)), 3.75 (*bs*, H-N, exchangeable with D<sub>2</sub>O), 3.39-3.31 (*m*, H-C(3)), 3.31-3.35 (*m*, 2H-C(9')), 2.71 (*t*,  $J = 6.3$ , 2H-C(11')), 2.55-2.44 (*m*, 2H-C(24)), 2.01 (*s*, CH<sub>3</sub>COO), 1.97 (*s*, CH<sub>3</sub>COO), 0.90 (*s*, CH<sub>3</sub>-C(10)), 0.74 (*d*,  $J = 6.4$ , CH<sub>3</sub>-C(20)), 0.64 (*s*, CH<sub>3</sub>-C(13)). <sup>13</sup>C NMR (125 MHz, CDCl<sub>3</sub>, δ): 170.02, 170.85, 151.11, 150.72, 148.18, 134.90, 127.05, 124.83, 122.13, 117.19, 98.08, 75.51, 70.98, 70.87, 50.11, 49.22, 49.05, 48.88, 48.71, 48.54, 48.37, 47.98, 47.45, 44.83, 43.17, 42.08, 40.75, 38.12, 37.51, 34.79, 34.61, 34.00, 33.11, 31.07, 29.94, 28.70, 27.29, 27.05, 26.25, 25.26, 22.52, 22.24, 21.13, 20.96, 17.59. (+)ESI-HRMS (*m/z*): [M + H]<sup>+</sup> 696.4133 (error -0.71 ppm). Combustion analysis for (C<sub>40</sub>H<sub>58</sub>ClN<sub>3</sub>O<sub>5</sub>×2H<sub>2</sub>O): calculated C 65.60, H 8.53, N 5.74; found C 65.95, H 8.20, N 5.85. HPLC purity: Method B: RT 8.583, area 95.71 %; method C: RT 13.187, area 95.02 %.

***N*-(3α-Hydroxy-7α,12α-diacetoxy-5β-cholan-24-yl)-*N'*-(7'-chloroquinolin-4'-yl)-butane-1,4-diamine (18).** Alcohol **18** was obtained according to procedure described for **16**, using **14** (2.21 g, 0.24 mmol) and anh. K<sub>2</sub>CO<sub>3</sub> (673 mg, 4.87 mmol). Product was isolated after column chromatography purification (Biotage SP1 flash, RP-column, eluent gradient MeOH/H<sub>2</sub>O 7:3 → MeOH, NH-column eluent gradient EA → EA/MeOH 8:2). Yield 1.67 g (80 %). colorless foam softens at 101-103 °C.  $[\alpha]_D^{20} = +0.064$  ( $c = 1.4 \times 10^{-3}$  g/mL, DCM). IR (ATR): 3303m, 3059w, 29.36s, 2866m, 1726s, 1610w, 1581s, 1540w, 1450w, 1374m, 1332w, 1250s, 1138w, 1076m, 1021m, 967w, 900w, 852w, 808w cm<sup>-1</sup>. <sup>1</sup>H NMR (500 MHz, CDCl<sub>3</sub>, δ): 8.51 (*d*,  $J = 5.5$ , H-C(2')), 7.94 (*d*,  $J = 2.1$ , H-C(8')), 7.71 (*d*,  $J = 8.9$ , H-C(5')), 7.33, (*dd*,  $J_1 = 8.9$ ,  $J_2 = 2.1$ , H-C(6')), 6.37 (*d*,  $J = 5.5$ , H-C(3')), 6.01 (*bs*, H-N, exchangeable with D<sub>2</sub>O), 5.11-5.07 (*m*, H-C(12)), 4.92-4.88 (*m*, H-C(7)), 3.55-3.46 (*m*, H-C(3)), 3.30 (*t*,  $J = 6.4$ , 2H-C(9')), 2.70 (*t*,  $J = 6.8$ , 2H-C(12')), 2.64-2.52 (*m*, 2H-C(24)), 2.11 (*s*, CH<sub>3</sub>COO), 2.07 (*s*, CH<sub>3</sub>COO), 0.90 (*s*, CH<sub>3</sub>-C(10)), 0.83 (*d*,  $J = 6.6$ , CH<sub>3</sub>-C(20)), 0.72 (*s*, CH<sub>3</sub>-C(13)).

$^{13}\text{C}$  NMR (125 MHz,  $\text{CDCl}_3$ ,  $\delta$ ): 170.64, 170.61, 152.05, 149.99, 149.15, 134.71, 128.70, 124.94, 121.37, 117.31, 98.85, 75.47, 71.65, 70.84, 50.54, 49.14, 47.56, 45.02, 43.41, 43.21, 38.69, 37.76, 34.98, 34.85, 34.27, 33.37, 31.36, 30.49, 28.96, 27.87, 37.30, 36.55, 26.30, 25.56, 22.80, 22.55, 21.62, 21.45, 17.92, 12.22. (+)ESI-HRMS ( $m/z$ ):  $[\text{M} + \text{Na}]^+$  732.4113 (error -0.09 ppm). Combustion analysis for  $(\text{C}_{41}\text{H}_{60}\text{ClN}_3\text{O}_5 \times 0.5\text{H}_2\text{O})$ : calculated C 68.45, H 8.55, N 5.84; found C 65.22, H 8.35, N 5.62. HPLC purity: Method A: RT 1.879, area 99.04 %; method D: RT 5.495, area 97.05 %.

***N*-(3 $\alpha$ -Hydroxy-7 $\alpha$ ,12 $\alpha$ -diacetoxy-5 $\beta$ -cholan-24-yl)-N'-(7'-chloroquinolin-4'-yl)-hexane-1,6-diamine (19).** Alcohol **19** was obtained according to procedure described for **16**, using **15** (204.9 mg, 0.26 mmol) and anh.  $\text{K}_2\text{CO}_3$  (64 mg, 0.46 mmol). Yield 180 mg (92%), colorless foam softens at 98-101 °C.  $[\alpha]_{\text{D}}^{20} = +0.074$  ( $c = 1.6 \times 10^{-3}$  g/mL, DCM). IR (ATR): 3302m, 306w, 2933s, 2863m, 1725s, 1609w, 1581s, 1540w, 1450m, 1373m, 1332w, 1250s, 1140w, 1076m, 1022m, 966w, 939w, 899w, 852w, 809w, 736m  $\text{cm}^{-1}$ .  $^1\text{H}$  NMR (200 MHz,  $\text{CDCl}_3$ ,  $\delta$ ): 8.50 (*d*,  $J = 5.6$ , H-C(2')), 7.94 (*d*,  $J = 1.6$ , H-C(8')), 7.76 (*d*,  $J = 9.0$ , H-C(5')), 7.40-7.30, (*m*, H-C(6')), 6.38 (*d*,  $J = 5.6$ , H-C(3')), 5.37 (*bs*, H-N, exchangeable with  $\text{D}_2\text{O}$ ), 5.07 (*bs*, H-C(12)), 4.89 (*bs*, H-C(7)), 3.60-3.20 (*m*, H-C(3) and 2H-C(9')), 2.50-2.80 (*m*, 2H-C(14') and 2H-C(24)), 2.10 (*s*,  $\text{CH}_3\text{COO}$ ), 2.07 (*s*,  $\text{CH}_3\text{COO}$ ), 0.90 (*s*,  $\text{CH}_3\text{-C}(10)$ ), 0.80 (*d*,  $J = 6.2$ ,  $\text{CH}_3\text{-C}(20)$ ), 0.70 (*s*,  $\text{CH}_3\text{-C}(13)$ ).  $^{13}\text{C}$  NMR (50 MHz,  $\text{CDCl}_3$ ,  $\delta$ ): 170.69, 151.81, 149.85, 148.92, 134.86, 128.47, 125.20, 121.15, 117.07, 98.90, 75.45, 71.39, 70.85, 49.98, 49.29, 47.43, 44.96, 43.34, 42.92, 40.97, 38.58, 37.69, 34.81, 34.21, 33.16, 31.30, 30.40, 29.22, 28.88, 28.53, 27.20, 26.84, 25.77, 25.49, 22.74, 22.49, 21.58, 21.40, 17.79, 12.13.  $^1\text{H}$  NMR (500 MHz,  $\text{CDCl}_3$ ,  $\delta$ ): 8.52 (*d*,  $J = 5.5$ , H-C(2')), 7.95 (*d*,  $J = 2.1$ , H-C(8')), 7.73 (*d*,  $J = 9.2$ , H-C(5')), 7.35, (*dd*,  $J_1 = 8.9$ ,  $J_2 = 2.1$ , H-C(6')), 6.40 (*d*,  $J = 5.3$ , H-C(3')), 5.20 (*bs*, H-N, exchangeable with  $\text{D}_2\text{O}$ ), 5.08 (*bs*, H-C(12)), 4.92-4.86 (*m*, H-C(7)), 3.55-3.45 (*m*,

H-C(3)), 3.34-3.24 (*m*, 2H-C(9')), 2.50-2.80 (*m*, 2H-C(14') and 2H-C(24)), 2.11 (*s*, CH<sub>3</sub>COO), 2.07 (*s*, CH<sub>3</sub>COO), 0.90 (*s*, CH<sub>3</sub>-C(10)), 0.81 (*d*, *J* = 6.4, CH<sub>3</sub>-C(20)), 0.70 (*s*, CH<sub>3</sub>-C(13)). <sup>13</sup>C NMR (125 MHz, CDCl<sub>3</sub>, δ): 170.61, 151.83, 149.85, 148.96, 134.82, 128.55, 125.16, 121.14, 117.12, 98.93, 75.44, 71.54, 70.82, 49.82, 49.10, 47.48, 44.98, 43.36, 43.03, 41.01, 38.68, 37.72, 34.83, 34.24, 33.16, 31.34, 30.48, 28.91, 28.56, 27.23, 26.81, 25.52, 22.76, 22.51, 26.60, 21.43, 17.81, 12.17. (+)ESI-HRMS (*m/z*): [M + 2H]<sup>2+</sup> 369.7326 (error -3.80 ppm). Combustion analysis for (C<sub>43</sub>H<sub>64</sub>ClN<sub>3</sub>O<sub>5</sub>×0.5H<sub>2</sub>O): calculated C 69.10, H 8.77, N 5.62; found C 68.85, H 8.95, N 5.40. HPLC purity: Method A: RT 1.869, area 99.39 %; method C: RT=11.500, area 95.59 %.

***N*-Methyl-*N*-(3*α*,7*α*,12*α*-triacetoxy-5*β*-cholan-24-yl)-*N'*-(7'-chloroquinolin-4'-yl)-**

**propane-1,3-diamine (21).** Compound **21** was obtained according to procedure described for **20**, using **13** (303 mg, 0.41 mmol. Yield 254 mg (83%), colorless foam softens at 76-80 °C. [ $\alpha$ ]<sub>D</sub><sup>20</sup> = +0.103 (*c* = 1.2×10<sup>-3</sup> g/mL, DCM). IR (KBr): 3404w, 2945m, 2869w, 2797w, 1734s, 1611w, 1582s, 1538w, 1451w, 1375m, 1331w, 1248s, 1138s, 1072w, 1025w, 965w, 938w, 889w, 849w, 806w cm<sup>-1</sup>. <sup>1</sup>H NMR (500 MHz, CDCl<sub>3</sub>, δ): 8.49 (*d*, *J* = 5.4, H-C(2')), 7.94 (*d*, *J* = 1.9, H-C(8')), 7.90 (bs, H-N, exchangeable with D<sub>2</sub>O), 7.66 (*d*, *J* = 9.0, H-C(5')), 7.34 (*dd*, *J*<sub>1</sub> = 9.0, *J*<sub>2</sub> = 2.1, H-C(6')), 6.31 (*d*, *J* = 5.4, H-C(3')), 5.06 (*s*, H-C(12)), 4.90-4.87 (*m*, H-C(7)), 4.60-4.53 (*m*, H-C(3)), 3.39 (*bs*, 2H-C(9')), 2.64, (*t*, *J* = 5.1, 2H-C(11')), 2.44-2.40 (*m*, 2H-C(24)), 2.37 (*s*, CH<sub>3</sub>-N), 2.07 (*s*, CH<sub>3</sub>COO), 2.06 (*s*, CH<sub>3</sub>COO), 2.05 (*s*, CH<sub>3</sub>COO), 0.90 (*s*, CH<sub>3</sub>-C(10)), 0.78 (*d*, *J* = 6.4, CH<sub>3</sub>-C(20)), 0.68 (*s*, CH<sub>3</sub>-C(13)). <sup>13</sup>C NMR (125 MHz, CDCl<sub>3</sub>, δ): 170.53, 170.46, 170.38, 151.78, 150.74, 148.81, 134.73, 128.24, 124.85, 121.98, 117.54, 98.29, 75.37, 74.03, 70.62, 58.78, 57.57, 47.71, 45.01, 44.16, 43.39, 42.06, 40.89, 37.69, 35.03, 34.61, 34.57, 34.26, 33.63, 31.19, 29.65, 28.91, 27.19, 26.82, 25.56, 24.18, 23.90, 22.72, 22.52, 21.55, 21.45, 21.33, 17.87, 12.19. (+)ESI-HRMS (*m/z*):

$[M + H]^+$  752.43936 (error -0.84 ppm). Combustion analysis for ( $C_{43}H_{62}ClN_3O_6 \times 1.5H_2O$ ): calculated C 66.26, H 8.41, N 5.39; found C 66.54, H 8.25, N 5.41. HPLC purity: Method A: RT 2.032, area 99.46 %; method B: RT 8.689, area 96.92 %.

***N*-(3-Oxo-7 $\alpha$ ,12 $\alpha$ -diacetoxy-5 $\beta$ -cholan-24-yl)-*N'*-(7'-chloroquinolin-4'-yl)-propane-1,3-diamine (23).** Ketone **30** was obtained according to procedure described for **22**, using **17** (416 mg, 0.59 mmol) and IBX (822 mg, 2.94 mmol). Yield 366 mg (88%), colorless foam softens at 100-105 °C.  $[\alpha]_D^{20} = +0.149$  ( $c = 2.0 \times 10^{-3}$  g/mL, DCM). IR (ATR): 3409m, 2948m, 2869w, 1733s, 1719sm, 1653w, 1642w, 1612w, 1582s, 1541m, 1445m, 1376s, 1332w, 1244s, 1215m, 1138w, 1078w, 1024w, 964w, 901w, 852w, 807w  $cm^{-1}$ .  $^1H$  NMR (200 MHz,  $CDCl_3$ ,  $\delta$ ): 8.49 (*d*,  $J = 5.1$ , H-C(2')), 7.92 (*d*,  $J = 1.7$ , H-C(8')), 7.84 (*bs*, H-N), 7.73 (*d*,  $J = 8.4$ , H-C(5')), 7.36-7.25, (*m*, H-C(6')), 6.31 (*d*,  $J = 5.1$ , H-C(3')), 5.16 (*bs*, H-C(12)), 5.05-4.95 (*m*, H-C(7)), 3.39 (*bs*, 2H-C(9')), 3.10-2.84 (*m*, H $\alpha$ -C(4) and 2H-C(11')), 2.72-2.56 (*m*, 2H-C(24)), 2.11 (*s*,  $CH_3COO$ ), 2.03 (*s*,  $CH_3COO$ ), 1.03 (*s*,  $CH_3-C(10)$ ), 0.87 (*d*,  $J = 6.7$ ,  $CH_3-C(20)$ ), 0.78 (*s*,  $CH_3-C(13)$ ).  $^{13}C$  NMR (50 MHz,  $CDCl_3$ ,  $\delta$ ): 212.02, 170.37, 170.09, 151.98, 150.45, 148.95, 134.35, 128.25, 127.85, 124.45, 122.12, 117.46, 98.12, 75.14, 70.39, 50.40, 49.38, 47.40, 44.92, 44.39, 43.85, 43.19, 42.02, 37.53, 36.47, 35.96, 35.27, 34.81, 34.20, 33.19, 30.70, 29.64, 27.06, 26.46, 25.69, 22.60, 21.47, 21.25, 21.18, 17.75, 12.11.  $^1H$  NMR (500 MHz,  $CDCl_3$ ,  $\delta$ ): 8.47 (*d*,  $J = 5.5$ , H-C(2')), 7.90 (*d*,  $J = 2.1$ , H-C(8')), 7.77 (*bs*, H-N, exchangeable with  $D_2O$ ), 7.70 (*d*,  $J = 8.9$ , H-C(5')), 7.30, (*dd*,  $J_1 = 8.8$ ,  $J_2 = 2.2$ , H-C(6')), 6.29 (*d*,  $J = 5.5$ , H-C(3')), 5.14 (*bs*, H-C(12)), 5.00-4.95 (*m*, H-C(7)), 3.37 (*bs*, 2H-C(9')), 2.99 (*dd*,  $J_1 = 15.1$ ,  $J_2 = 14$ , H $\alpha$ -C(4)), 2.93-2.87 (*m*, 2H-C(11')), 2.69-2.57 (*m*, 2H-C(24)), 2.09 (*s*,  $CH_3COO$ ), 2.01 (*s*,  $CH_3COO$ ), 1.00 (*s*,  $CH_3-C(10)$ ), 0.86 (*d*,  $J = 6.6$ ,  $CH_3-C(20)$ ), 0.76 (*s*,  $CH_3-C(13)$ ).  $^{13}C$  NMR (125 MHz,  $CDCl_3$ ,  $\delta$ ): 212.01, 170.39, 170.13, 152.14, 150.50, 149.14, 134.46, 128.53, 124.57, 122.07, 117.57, 98.26, 75.26, 70.51, 50.55,

49.62, 47.56, 45.07, 44.51, 44.11, 43.34, 42.15, 37.70, 36.58, 36.10, 34.98, 34.35, 33.35, 30.86, 29.81, 27.24, 26.68, 25.84, 22.74, 21.61, 21.36, 21.29, 17.92, 12.25. (+)ESI-HRMS ( $m/z$ ):  $[M + 2H]^{2+}$  347.7032 (error + 1.58 ppm),  $[M + H]^+$  694.3964 (error -2.48 ppm); Combustion analysis for ( $C_{40}H_{56}ClN_3O_5 \times H_2O$ ): calculated C 67.44, H 8.21, N 5.90; found C 67.78, H 8.00, N 5.82. HPLC purity: Method C: RT=13.105, area 95.15%; method D: RT 5.414, area 95.21%.

***N*-(3-Oxo-7 $\alpha$ ,12 $\alpha$ -diacetoxy-5 $\beta$ -cholan-24-yl)-*N'*-(7'-chloroquinolin-4'-yl)-butane-1,4-diamine (24).** Ketone **24** was obtained according to procedure described for **22**, using **18** (1.35 g, 1.91 mmol) and IBX (2.58 g, 9.13 mmol). Yield 1.26 g (93%), colorless foam softens at 91-92 °C.  $[\alpha]_D^{20} = +0.069$  ( $c = 1.8 \times 10^{-3}$  g/mL, DCM). IR (ATR): 3405m, 2948m, 2870w, 1732s, 1667w, 1612w, 1581s, 1539w, 1449w, 1374m, 1332w, 1245s, 1136w, 1078w, 1025m, 966w, 901w, 851w, 810w  $cm^{-1}$ .  $^1H$  NMR (500 MHz,  $CDCl_3$ ,  $\delta$ ): 8.52 (*d*,  $J = 5.5$ , H-C(2')), 7.94 (*d*,  $J = 2.1$ , H-C(8')), 7.70 (*d*,  $J = 8.9$ , H-C(5')), 7.32, (*dd*,  $J_1 = 8.8$ ,  $J_2 = 2.2$ , H-C(6')), 6.37 (*d*,  $J = 5.5$ , H-C(3')), 6.02 (*bs*, H-N, exchangeable with  $D_2O$ ), 5.14 (*bs*, H-C(12)), 5.02-4.97 (*m*, H-C(7)), 3.34-3.27 (*m*, 2H-C(9')), 3.03-2.93 (*m*, H $\alpha$ -C(4)), 2.70, (*t*,  $J = 6.6$ , 2H-C(12')), 2.65-2.53 (*m*, H-N and 2H-C(24)), 2.10 (*s*,  $CH_3COO$ ), 2.06 (*s*,  $CH_3COO$ ), 1.02 (*s*,  $CH_3-C(10)$ ), 0.84 (*d*,  $J = 6.6$ ,  $CH_3-C(20)$ ), 0.76 (*s*,  $CH_3-C(13)$ ).  $^{13}C$  NMR (125 MHz,  $CDCl_3$ ,  $\delta$ ): 212.06, 170.40, 170.13, 152.11, 149.95, 149.21, 134.66, 128.76, 124.89, 121.35, 117.32, 98.86, 75.28, 70.58, 50.56, 49.19, 47.60, 45.06, 44.55, 43.26, 43.22, 42.14, 37.74, 36.60, 36.11, 34.98, 34.38, 33.37, 30.91, 29.80, 27.91, 27.24, 26.61, 26.31, 25.81, 22.80, 21.62, 21.44, 21.31, 17.94, 12.25. (+)ESI-HRMS ( $m/z$ ):  $[M + Na]^+$  730.3964 (error +0.86 ppm). Combustion analysis for ( $C_{41}H_{58}ClN_3O_5 \times 0.5H_2O$ ): calculated C 68.64, H 8.29, N 5.86; found C 68.39, H 8.41, N 5.63. HPLC purity: Method A: RT 1.872, Area 99.17 %; method C: RT 12.077, area 95.14 %.

***N*-(3-Oxo-7 $\alpha$ ,12 $\alpha$ -diacetoxy-5 $\beta$ -cholan-24-yl)-*N'*-(7'-chloroquinolin-4'-yl)-hexane-1,6-diamine (25).** Ketone **32** was obtained according to procedure described for **22**, using **19** (349 mg, 0.47 mmol) and IBX (632 mg, 2.26 mmol). Yield 283 mg (81%), colorless foam softens at 85-90 °C.  $[\alpha]_D^{20} = +0.042$  ( $c = 1.5 \times 10^{-3}$  g/mL, DCM). IR (ATR): 3314w, 2938s, 2867m, 1733s, 1611w, 1583s, 1539w, 1451w, 1376m, 1333w, 1250s, 1216w, 1136w, 1027w, 852w, 811w  $\text{cm}^{-1}$ .  $^1\text{H}$  NMR (500 MHz,  $\text{CDCl}_3$ ,  $\delta$ ): 8.52 (*d*,  $J = 5.35$ , H-C(2')), 7.95 (*d*,  $J = 2.2$ , H-C(8')), 7.66 (*d*,  $J = 9.0$ , H-C(5')), 7.35 (*dd*,  $J_1 = 8.8$ ,  $J_2 = 2.2$ , H-C(6')), 6.40 (*d*,  $J = 5.5$ , H-C(3')), 5.15-5.11 (*m*, H-C(12)), 5.03 (*bs*, H-N, exchangeable with  $\text{D}_2\text{O}$ ), 5.01-4.98 (*m*, H-C(7)), 3.35-3.27 (*m*, 2H-C(9')), 2.98 (*dd*,  $J_1 = 15.1$ ,  $J_2 = 13.8$ , H $\alpha$ -C(4)), 2.64-2.48, (*m*, 2H-C(14') and 2H-C(24)), 2.10 (*s*,  $\text{CH}_3\text{COO}$ ), 2.06 (*s*,  $\text{CH}_3\text{COO}$ ), 1.01 (*s*,  $\text{CH}_3\text{-C}(10)$ ), 0.83 (*d*,  $J = 6.6$ ,  $\text{CH}_3\text{-C}(20)$ ), 0.76 (*s*,  $\text{CH}_3\text{-C}(13)$ ).  $^{13}\text{C}$  NMR (125 MHz,  $\text{CDCl}_3$ ,  $\delta$ ): 212.09, 170.41, 170.14, 152.01, 149.65, 149.10, 134.77, 128.81, 125.20, 120.80, 117.07, 99.03, 75.29, 70.57, 50.56, 49.93, 47.45, 45.01, 44.53, 43.24, 43.15, 42.13, 37.73, 36.58, 36.09, 34.85, 34.36, 33.29, 30.90, 30.03, 29.78, 28.78, 27.19, 27.09, 27.03, 26.44, 25.79, 22.79, 21.60, 21.43, 21.30, 17.90, 12.21. (+)ESI-HRMS ( $m/z$ ):  $[\text{M} + \text{H}]^+$  736.4416 (error -4.79 ppm). Combustion analysis for ( $\text{C}_{43}\text{H}_{62}\text{ClN}_3\text{O}_5$ ): calculated C 70.13, H 8.49, N 5.71; found C 69.83, H 8.19, N 5.73. HPLC purity: Method A: RT 1.810, area 99.47 %; method C: RT=12.061, area 97.17 %.

**Methyl 3 $\alpha$ -amino-7 $\alpha$ ,12 $\alpha$ -diacetoxy-5 $\beta$ -cholanoate (26).** Amine **26** was synthesized according to procedures described in ref. **Error! Bookmark not defined.**

**Methyl 3 $\alpha$ -acetamido-7 $\alpha$ ,12 $\alpha$ -diacetoxy-5 $\beta$ -cholate (27).** Into stirred solution of **26** (238 mg, 0.47 mmol) and  $\text{Et}_3\text{N}$  (130  $\mu\text{L}$ , 0.94 mmol) in DCM (3 mL),  $\text{Ac}_2\text{O}$  (67  $\mu\text{L}$ , 0.705 mmol) was added. Mixture was stirred at r.t. for 1.5 h, diluted with DCM (25 mL), washed with

brine (2×10 mL) and dried over anh. Na<sub>2</sub>SO<sub>4</sub>. Solution was filtered off and solvent was removed under reduced pressure. Into remained oil, heptane was added and evaporated to dryness to remove traces of AcOH and Ac<sub>2</sub>O. Crude product was purified by column chromatography (dry flash, SiO<sub>2</sub>, EA). Yield 197.2 mg (76.6%). Mp = 164-167 °C (acetone/hexane).  $[\alpha]_D^{20} = +0.122$  (c = 1.52×10<sup>-3</sup> g/mL, DCM). IR (KBr): 3396m, 2953m, 2871m, 1736s, 1653m, 1541m, 1438m, 1377m, 1248s, 1174w, 1024m, 967w, cm<sup>-1</sup>. <sup>1</sup>H NMR (200 MHz, CDCl<sub>3</sub>, δ): 5.81 (*d*, *J* = 7.2, N-H), 5.39 (*d*, *J* = 8.0, H-N), 5.09 (*bs*, H-C(12)), 4.91 (*bs*, H-C(7)), 4.14 (*bs*, H-C(3)), 3.66 (*s*, CO<sub>2</sub>CH<sub>3</sub>), 2.126 (*s*, CH<sub>3</sub>COO), 2.12 (*s*, CH<sub>3</sub>COO), 2.08 (*s*, CH<sub>3</sub>COO), 2.07 (*s*, CH<sub>3</sub>COO), 1.97 (*bs*, CH<sub>3</sub>CONH), 0.95 (*s*, CH<sub>3</sub>-C(10)), 0.92 (*s*, CH<sub>3</sub>-C(10)), 0.81 (*d*, *J* = 6.2, CH<sub>3</sub>-C(20)), 0.73 (*bs*, CH<sub>3</sub>-C(13)). <sup>13</sup>C NMR (50 MHz, CDCl<sub>3</sub>, δ): 174.52, 170.49, 170.38, 170.31, 170.17, 169.38, 169.15, 75.42, 75.25, 70.76, 70.61, 51.46, 49.58, 47.23, 44.96, 44.90, 43.35, 43.26, 41.37, 37.60, 36.91, 36.09, 35.34, 34.58, 34.50, 34.20, 32.63, 31.48, 31.21, 30.77, 30.64, 28.84, 28.9, 28.04, 27.08, 25.49, 24.62, 23.54, 23.09, 22.69, 22.54, 21.58, 21.50, 21.32, 21.25, 17.39, 14.02, 12.13. (+)ESI-HRMS (*m/z*): [M + K]<sup>+</sup> 586.31366 (error -0.68 ppm). Combustion analysis for (C<sub>31</sub>H<sub>49</sub>NO<sub>7</sub>×0.5 H<sub>2</sub>O): calculated C 66.88, H 9.05, N 2.52; found C 66.99, H 8.77, N 2.40.

**Methyl 3α-methanesulfonamido-7α,12α-diacetoxy-5β-cholanoate (28).** Compound **28** was obtained according to procedure described for **27**, using **26** (250 mg, 0.494 mmol), methanesulfonylchloride (50 μL, 0.646 mmol). Yield 257 mg (89%), colorless foam softens at 92-100 °C.  $[\alpha]_D^{20} = +0.10$  (c = 1.2×10<sup>-3</sup> g/mL, DCM). IR (KBr): 3530w, 3284w, 2953m, 2872w, 173s, 1441m, 1379m, 1319m, 1249s, 1152m, 1082w, 1024m, 968w, cm<sup>-1</sup>. <sup>1</sup>H NMR (500 MHz, CDCl<sub>3</sub>, δ): 5.10-5.07 (*m*, H-C(12)), 4.93-4.89 (*m*, H-C(7)), 4.32 (*d*, *J* = 7, N-H, exchangeable with D<sub>2</sub>O), 3.66 (*s*, CO<sub>2</sub>CH<sub>3</sub>), 3.19-3.09 (*m*, H-C(3)), 2.94 (*s*, CH<sub>3</sub>-SO<sub>2</sub>NH), 2.38-2.30 (*m*, 1H), 2.26-2.16 (*m*, 1H), 2.13 (*s*, CH<sub>3</sub>COO), 2.08 (*s*, CH<sub>3</sub>COO), 0.92 (*s*, CH<sub>3</sub>-



C(10)), 0.81 (*d*,  $J = 6.5$ , CH<sub>3</sub>-C(20)), 0.73 (*bs*, CH<sub>3</sub>-C(13)). <sup>13</sup>C NMR (125 MHz, CDCl<sub>3</sub>, δ): 174.49, 170.43, 170.23, 75.33, 70.66, 54.02, 51.50, 47.34, 45.03, 43.31, 41.89, 41.61, 37.69, 37.37, 35.42, 34.58, 34.08, 31.20, 30.86, 30.73, 29.41, 28.80, 27.13, 25.45, 22.77, 22.61, 21.59, 21.35, 17.48, 12.19. (+)ESI-HRMS (*m/z*): [M + NH<sub>4</sub>]<sup>+</sup> 601.3501 (error -2.69 ppm), [M + Na]<sup>+</sup> 606.30589 (error -2.0 ppm). Combustion analysis for (C<sub>30</sub>H<sub>49</sub>NO<sub>8</sub>S × H<sub>2</sub>O): calculated C 59.87, H 8.54, N 2.33; found C 59.90, H 8.48, N 2.37.

**Methyl 3α-*N*-*tert*-butylcarbamate-7α,12α-diacetoxydiacetoxy-5β-cholanoate (29).**

Compound **29** was obtained according to procedure described for **27**, using **26** (6.04 g, 11.94 mmol) and Boc<sub>2</sub>O (3.91 g, 17.91 mmol). Yield of crude product 7.00 g (97%). Analytical sample was obtained after column purification (dry-flash, SiO<sub>2</sub>, eluent Hex / EA). Colorless foam softens at 84-86 °C.  $[\alpha]_{\text{D}}^{20} = +0.061$  ( $c = 1.1 \times 10^{-3}$  g/mL, DCM). IR (KBr): 3444s, 2954m, 2872w, 1736s, 1517m, 1451w, 1378m, 1246s, 1172m, 1067w, 1024m, 966w cm<sup>-1</sup>. <sup>1</sup>H NMR (200 MHz, CDCl<sub>3</sub>, δ): 5.12-5.06 (*m*, H-C(12)), 4.94-4.86 (*m*, H-C(7)), 4.36 (*bs*, H-N-Boc), 3.66 (*s*, CO<sub>2</sub>CH<sub>3</sub>), 3.34-3.20 (*m*, H-C(3)), 2.12 (*s*, CH<sub>3</sub>COO), 2.08 (*s*, CH<sub>3</sub>COO), 1.44 (*s*, (CH<sub>3</sub>)<sub>3</sub>C-N(Boc)), 0.91 (*s*, CH<sub>3</sub>-C(10)), 0.81 (*d*,  $J = 6.0$ , CH<sub>3</sub>-C(20)), 0.72 (*s*, CH<sub>3</sub>-C(13)). <sup>13</sup>C NMR (50 MHz, CDCl<sub>3</sub>, δ): 174.56, 170.44, 170.31, 155.16, 79.22, 75.40, 70.83, 51.49, 50.84, 47.30, 45.01, 43.34, 41.50, 37.65, 36.36, 35.45, 34.56, 34.21, 31.25, 30.83, 30.72, 28.81, 28.37, 27.13, 25.46, 22.76, 22.67, 21.60, 21.34, 17.44, 12.15. (+)ESI-HRMS (*m/z*): [M + Na]<sup>+</sup> 628.3820 (error -1.45 ppm). Combustion analysis for (C<sub>34</sub>H<sub>55</sub>NO<sub>8</sub> × 0.5 H<sub>2</sub>O): calculated C 66.42, H 9.18, N 2.28; found C 66.65, H 8.88, N 2.27.

**3α-Acetamido-7α,12α-diacetoxy-5β-cholanoic acid (30).** Methyl ester **27** (200 mg, 0.365 mmol) was hydrolyzed at 80 °C with NaOH (22 mg, 0.55 mmol) in *i*-PrOH / H<sub>2</sub>O mixture (8 mL, 3:1 v / v). After 2 h reaction was cooled and poured onto ice / water / HCl. The mixture was extracted with DCM (4×20 mL). Combined organic layers were washed once with brine,

dried over anh.  $\text{Na}_2\text{SO}_4$ , filtered and solvent was removed under reduced pressure. Yield: 176 mg (90 %), colorless foam softness at 134-138 °C.  $[\alpha]_{\text{D}}^{20} = +0.112$  ( $c = 1.0 \times 10^{-3}$  g/mL, DCM). IR (KBr): 3440m, 2952m, 2871m, 1733s, 1647m, 1552w, 1443w, 1378m, 1249s, 1122w, 1024w, 968w  $\text{cm}^{-1}$ .  $^1\text{H}$  NMR (200 MHz,  $\text{CDCl}_3$ ,  $\delta$ ): 5.41 (*d*,  $J = 7.8$ , H-N), 5.09 (*bs*, H-C(12)), 4.91 (*bs*, H-C(7)), 3.65 (*bs*, H-C(3)), 2.13 (*s*,  $\text{CH}_3\text{COO}$ ), 2.09 (*s*,  $\text{CH}_3\text{COO}$ ), 1.88 (*s*,  $\text{CH}_3\text{CONH}$ ), 0.92 (*s*,  $\text{CH}_3\text{-C}(10)$ ), 0.82 (*d*,  $J = 5.8$ ,  $\text{CH}_3\text{-C}(20)$ ), 0.73 (*s*,  $\text{CH}_3\text{-C}(13)$ ).  $^{13}\text{C}$  NMR (50 MHz,  $\text{CDCl}_3$ ,  $\delta$ ): 178.67, 170.42, 170.29, 169.57, 75.47, 70.83, 49.71, 47.29, 45.01, 43.37, 41.39, 37.64, 36.05, 35.36, 34.47, 34.23, 31.23, 30.74, 30.54, 28.86, 28.02, 27.09, 25.51, 23.49, 22.71, 21.61, 21.34, 17.43, 12.16. (+)ESI-HRMS ( $m/z$ ):  $[\text{M} + \text{H}]^+$  534.34219 (error -0.63 ppm). Combustion analysis for ( $\text{C}_{30}\text{H}_{47}\text{NO}_8 \times 1.5 \text{H}_2\text{O}$ ): calculated C 64.26, H 8.99, N 2.50; found C 64.55, H 8.72, N 2.47.

**3 $\alpha$ -Methanesulfonamido-7 $\alpha$ ,12 $\alpha$ -diacetoxy-5 $\beta$ -cholanoic acid (31).** Cholanoic acid **31** was obtained according to procedure described for **30**, using **27** (204 mg, 0.349 mmol). Yield 188 mg (94%), colorless foam softens at 108-117 °C.  $[\alpha]_{\text{D}}^{20} = +0.034$  ( $c = 1.0 \times 10^{-3}$  g/mL, DCM). IR (KBr): 3525w, 3280m, 2932s, 2872m, 1732s, 1444m, 1379s, 1317m, 1250s, 1151m, 1082m, 1024m, 967w, 759w  $\text{cm}^{-1}$ .  $^1\text{H}$  NMR (500 MHz,  $\text{CDCl}_3$ ,  $\delta$ ): 5.09 (*bs*, H-C(12)), 4.93-4.90 (*m*, H-C(7)), 4.50 (*d*,  $J = 7.5$ , N-H, exchangeable with  $\text{D}_2\text{O}$ ), 3.19-3.09 (*m*, H-C(3)), 2.97 (*s*,  $\text{CH}_3\text{-SO}_2\text{NH}$ ), 2.42-2.34 (*m*, 1H), 2.28-2.20 (*m*, 1H), 2.13 (*s*,  $\text{CH}_3\text{COO}$ ), 2.09 (*s*,  $\text{CH}_3\text{COO}$ ), 0.92 (*s*,  $\text{CH}_3\text{-C}(10)$ ), 0.82 (*d*,  $J = 6.5$ ,  $\text{CH}_3\text{-C}(20)$ ), 0.73 (*bs*,  $\text{CH}_3\text{-C}(13)$ ).  $^{13}\text{C}$  NMR (125 MHz,  $\text{CDCl}_3$ ,  $\delta$ ): 170.46, 170.30, 75.34, 70.69, 53.99, 47.33, 45.04, 43.31, 41.89, 41.60, 37.69, 37.33, 35.42, 34.54, 34.07, 31.18, 30.72, 30.52, 29.39, 28.79, 27.14, 25.44, 22.77, 22.60, 21.58, 21.35, 17.47, 12.20. (+)ESI-HRMS ( $m/z$ ):  $[\text{M} + \text{K}]^+$  608.26569 (error +0.49 ppm). Combustion analysis for ( $\text{C}_{29}\text{H}_{47}\text{NO}_8\text{S} \times 0.5 \text{H}_2\text{O}$ ): calculated C 60.18, H 8.36, N 2.42; found C 59.91, H 8.45, N 2.38.

**3 $\alpha$ -N-tert-Butylcarbamate-7 $\alpha$ ,12 $\alpha$ -diacetoxy-5 $\beta$ -cholanoic acid (32). Methyl ester 29**

(7.20 g, 11.89 mmol) was hydrolyzed at 80 °C with NaOH (710 mg, 17.75 mmol) in *i*-PrOH / H<sub>2</sub>O mixture (290 mL, 3:1 v / v). After 4 h the reaction mixture was cooled and poured onto ice cold water and neutralized with diluted HCl (1:1, v/v) to pH 7 and DCM was added (150 mL). Layers were separated, water layer was extracted with CH<sub>2</sub>Cl<sub>2</sub> (3× 20 mL) and combined organic layers were washed with water, brine, dried over anh. Na<sub>2</sub>SO<sub>4</sub> and evaporated to dryness. Yield 6.90 g (98%) of crude product. Analytical sample obtained upon column chromatography (dry-flash, SiO<sub>2</sub>, eluent Hex /EA). Colorless foam softens at 197-202 °C.  $[\alpha]_D^{20} = +0.110$  (c = 1.55×10<sup>-3</sup> g/mL, DCM). IR (KBr): 3411w, 3260w, 2954m, 2870w, 1732s, 1712m, 1681m, 1505m, 1451w, 1378m, 1315w, 1284m, 1245m, 1173m, 1126w, 1072w, 1033w, 1000w, 969w, 889,w, 858w, cm<sup>-1</sup>. <sup>1</sup>H NMR (200 MHz, CDCl<sub>3</sub>,  $\delta$ ): 5.09 (*bs*, H-C(12)), 4.90-4.70 (*m*, H-C(7)), 3.26 (*bs*, H-C(3)), 2.12 (*s*, CH<sub>3</sub>COO), 2.08 (*s*, CH<sub>3</sub>COO), 1.45 (*s*, (CH<sub>3</sub>)<sub>3</sub>C-N(Boc)), 0.91(*s*, CH<sub>3</sub>-C(10)), 0.82 (*d*, *J* = 5.8, CH<sub>3</sub>-C(20)), 0.73 (*s*, CH<sub>3</sub>-C(13)). <sup>13</sup>C NMR (50 MHz, CDCl<sub>3</sub>,  $\delta$ ): 170.46, 75.42, 70.85, 51.02, 47.34, 45.01, 43.34, 41.50, 37.67, 36.31, 35.43, 34.54, 34.20, 31.23, 30.57, 28.79, 28.37, 27.15, 25.44, 22.76, 22.65, 21.58, 21.32, 17.44, 12.15. (+)ESI-HRMS (*m/z*):[M + Na]<sup>+</sup> 614.3663 (error - 0.97 ppm). Combustion analysis (C<sub>33</sub>H<sub>53</sub>NO<sub>8</sub>): Calculated C 66.98, H 9.03, N 2.37; found C 67.33, H 9.07, N 2.33.

**3 $\alpha$ -Acetamido-7 $\alpha$ ,12 $\alpha$ -diacetoxy-5 $\beta$ -cholan-24-ol (33). Mixture of 30 (200 mg, 0.37**

mmol), Et<sub>3</sub>N (51  $\mu$ L, 0.37 mmol), and ClCO<sub>2</sub>Et (35  $\mu$ L, 0.37 mmol) in DCM (10 mL) were stirred at r.t. After 3 h reaction mixture was evaporated to dryness, residue was dissolved in DCM/THF mixture (20 mL, 3:1 v/v), NaBH<sub>4</sub> (56 mg, 1.48 mmol) was added, and after 15 min of intensive stirring MeOH (4 mL) was added in one portion, and stirring was continued. After 90 min mixture was poured onto ice / brine / HCl and left for 1 h. Mixture was

extracted with  $\text{CH}_2\text{Cl}_2$  (6×20 mL), and organic layer was washed once with brine, dried over anh.  $\text{Na}_2\text{SO}_4$ , and filtered. The solvent was removed under reduced pressure and product was isolated after column chromatography (dry flash,  $\text{SiO}_2$ , eluent Hex/EA gradient 9/1 → EA and EA/MeOH 95/5). Yield 124 mg (63.5 %), colorless foam softness at 129-131 °C.  $[\alpha]_{\text{D}}^{20} = +0.056$  ( $c = 1.0 \times 10^{-3}$  g/mL, DCM). IR (KBr): 3443s, 2946s, 2869m, 1734s, 1650s, 1553m, 1444w, 1378s, 1248s, 1115w, 1023w, 968.7w,  $\text{cm}^{-1}$ .  $^1\text{H}$  NMR (200 MHz,  $\text{CDCl}_3$ ,  $\delta$ ): 5.45 (d,  $J = 7.8$ , H-N), 5.10 (*bs*, H-C(12)), 4.96-4.88 (*m*, H-C(7)), 3.70-3.52 (*m*, H-C(3) and 2H-C(24)), 2.13 (*s*,  $\text{CH}_3\text{COO}$ ), 2.08 (*s*,  $\text{CH}_3\text{COO}$ ), 1.97 (*s*,  $\text{CH}_3\text{CONH}$ ), 0.92(*s*,  $\text{CH}_3\text{-C}(10)$ ), 0.82 (*d*,  $J = 6.2$ ,  $\text{CH}_3\text{-C}(20)$ ), 0.73 (*s*,  $\text{CH}_3\text{-C}(13)$ ).  $^{13}\text{C}$  NMR (50 MHz,  $\text{CDCl}_3$ ,  $\delta$ ): 170.38, 170.22, 169.29, 75.52, 70.79, 63.22, 49.60, 47.40, 44.92, 43.32, 41.35, 37.58, 36.03, 35.32, 34.63, 34.18, 31.52, 31.19, 28.97, 28.82, 28.00, 27.13, 25.47, 23.49, 22.67, 21.58, 21.32, 17.34, 12.11. (+)ESI-HRMS ( $m/z$ ): $[\text{M} + \text{K}]^+$  558.31923 (error +0.15 ppm). Combustion analysis ( $\text{C}_{30}\text{H}_{49}\text{NO}_6 \times 0.5\text{H}_2\text{O}$ ): calculated C 68.15, H 9.53, N 2.65; found C 68.15, H 9.77, N 2.58.

**3 $\alpha$ -Sulfonamido-7 $\alpha$ ,12 $\alpha$ -diacetoxy-5 $\beta$ -cholan-24-ol (34).** Alcohol **34** was obtained according to procedure described for **33**, using **31** (155 mg, 0.272 mmol). The product was isolated after column chromatography (dry flash,  $\text{SiO}_2$ , eluent DCM/MeOH gradient 9/1 → 1/1 and Lobar Lichroprep A,  $\text{SiO}_2$ , DCM/EA=65/35). Yield 81.9 mg (54%). Colorless foam softens at 96-98 °C.  $[\alpha]_{\text{D}}^{20} = +0.090$  ( $c = 1.4 \times 10^{-3}$  g/mL, DCM). IR (KBr): 3442m, 2946m, 2871w, 1733s, 1631w, 1448w, 1379m, 1318m, 1248s, 1150m, 1079w, 1023m, 972w, 896w, 759w  $\text{cm}^{-1}$ .  $^1\text{H}$  NMR (200 MHz,  $\text{CDCl}_3$ ,  $\delta$ ): 5.10 (*bs*, H-C(12)), 4.94-4.88 (*m*, H-C(7)), 4.46 (*d*,  $J = 7.4$ , N-H), 3.68-3.54 (*m*, 2H-C(24)), 3.24-3.02 (*m*, H-C(3)), 2.97 (*s*,  $\text{CH}_3\text{-SO}_2\text{NH}$ ), 2.16 (*s*,  $\text{CH}_3\text{COO}$ ), 2.09 (*s*,  $\text{CH}_3\text{COO}$ ), 0.92 (*s*,  $\text{CH}_3\text{-C}(10)$ ), 0.83 (*d*,  $J = 6.2$ ,  $\text{CH}_3\text{-C}(20)$ ), 0.73 (*bs*,  $\text{CH}_3\text{-C}(13)$ ).  $^{13}\text{C}$  NMR (125 MHz,  $\text{CDCl}_3$ ,  $\delta$ ): 170.57, 170.37, 75.40, 70.68, 63.34, 53.97, 47.43, 44.94, 43.26, 41.82, 41.57, 37.64, 37.27, 35.38, 34.70, 34.03, 31.54, 31.15,

29.33, 29.06, 28.75, 27.17, 25.40, 22.72, 22.56, 21.56, 21.34, 17.79, 12.15. (+)ESI-HRMS

( $m/z$ ):  $[M + NH_4]^+$  573.3575 (error +1.25 ppm). Combustion analysis for ( $C_{29}H_{49}NO_7S \times 0.5 H_2O$ ): calculated C 61.67, H 8.92, N 2.48, S 5.68 found C 61.55, H 8.79, N 2.55, S 5.92.

**3 $\alpha$ -N-tert-Butylcarbamate-7 $\alpha$ ,12 $\alpha$ -diacetoxy-5 $\beta$ -cholan-24-ol (35).** Compound **35** was obtained according to procedure described for **33**, using **32** (7.00 g, 11.82 mmol). When reduction was completed, the solvent was removed under reduced pressure, and the residue was dissolved in DCM and transferred to separatory funnel. Water was added and pH was adjusted to pH 1 with diluted HCl. Layers was separated, water layer was extracted with DCM (3 $\times$ 50 mL), combined organic layer was washed with sat. NaHCO<sub>3</sub> and brine, and dried over anh. Na<sub>2</sub>SO<sub>4</sub>. After filtration solvent was removed under reduced pressure, the product was isolated after column chromatography (dry flash, SiO<sub>2</sub>, eluent Hex/EA gradient 8/2 to 1/1). Yield 5.20 g (76 %), colorless foam softens at 104-107 °C.  $[\alpha]_D^{20} = +0.084$  ( $c = 1.25 \times 10^{-3}$  g/mL, DCM). IR (KBr): 3444m, 2940m, 2870m, 2357w, 1735s, 1716s, 1521m, 1451w, 1378m, 1248s, 1172m, 1062m, 1024m, 999w, 966w, 894w, 853w cm<sup>-1</sup>. <sup>1</sup>H NMR (200 MHz, CDCl<sub>3</sub>,  $\delta$ ): 5.12-5.06 (*m*, H-C(12)), 4.94-4.86 (*m*, H-C(7)), 4.38 (*bs*, H-N-Boc), 3.68-3.54 (*m*, 2H-C(24)), 3.25 (*bs*, H-O), 2.12 (*s*, CH<sub>3</sub>COO), 2.08 (*s*, CH<sub>3</sub>COO), 1.44 (*s*, (CH<sub>3</sub>)<sub>3</sub>C-N(Boc)), 0.91 (*s*, CH<sub>3</sub>-C(10)), 0.83 (*d*,  $J = 6.4$ , CH<sub>3</sub>-C(20)), 0.73 (*s*, CH<sub>3</sub>-C(13)). <sup>13</sup>C NMR (50 MHz, CDCl<sub>3</sub>,  $\delta$ ): 170.50, 170.37, 155.18, 79.24, 75.49, 70.88, 63.38, 50.82, 47.45, 44.96, 43.34, 41.50, 37.65, 36.36, 35.45, 34.72, 34.21, 31.57, 31.26, 29.08, 28.81, 28.37, 27.20, 25.46, 22.67, 21.61, 21.36, 17.81, 12.16. (+)ESI-HRMS ( $m/z$ ):  $[M + Na]^+$  600.3871 (error +4.85 ppm). Combustion analysis (C<sub>33</sub>H<sub>55</sub>NO<sub>7</sub>): Calculated C 68.60, H 9.59, N 2.42; found C 68.73, H 9.19, N 2.39.

**24-N-[(7-Chloroquinoline-4-yl)amino]propylamino-3 $\alpha$ -acetamido-7 $\alpha$ ,12 $\alpha$ -diacetoxy-5 $\beta$ -cholane (37).** Compound **37** was obtained according to procedure described for **36**, using alcohol **33** (134 mg, 0.26 mmol). Yield 75 mg (39%), colorless foam softens at 108-112 °C.  $[\alpha]_D^{20} = +0.085$  ( $c = 1.5 \times 10^{-3}$  g/mL, DCM). IR (KBr): 3296m, 3067w, 2937s, 2867s, 1731s, 1653m, 1612m, 1583s, 1542m, 1449m, 1376s, 1331w, 1249s, 1137w, 1077w, 1023m, 968w, 899w, 878w, 852w, 806w, 768w, 733w,  $\text{cm}^{-1}$ .  $^1\text{H}$  NMR (500 MHz,  $\text{CDCl}_3$ ,  $\delta$ ): 8.49 (*d*,  $J = 5.4$ , H-C(2')), 7.92 (*d*,  $J = 2.1$ , H-C(8')), 7.89 (*bs*, H-N,, exchangeable with  $\text{D}_2\text{O}$ ), 7.75 (*d*,  $J = 9.0$ , H-C(5')), 7.36 (*dd*,  $J_1 = 8.9$ ,  $J_2 = 2.2$ , H-C(6')), 6.31 (*d*,  $J = 5.4$ , H-C(3')), 5.36 (*d*,  $J = 8.0$ , H-N), 5.11 (*bs*, H-C(12)), 4.93-4.88 (*m*, H-C(7)), 3.68-3.58 (*bs*, H-C(3)), 3.44-3.35 (*m*, 2H-C(9')), 2.98-2.88 (*m*, 2H-C(11')), 2.72-2.59 (*m*, 2H-C(24)), 2.08 (*s*,  $\text{CH}_3\text{COO}$ ), 2.00 (*s*,  $\text{CH}_3\text{COO}$ ), 1.98 (*s*,  $\text{CH}_3\text{CONH}$ ), 0.92 (*bs*,  $\text{CH}_3\text{-C}(10)$ ), 0.85 (*d*,  $J = 6.6$ ,  $\text{CH}_3\text{-C}(20)$ ), 0.74 (*bs*,  $\text{CH}_3\text{-C}(13)$ ).  $^{13}\text{C}$  NMR (125 MHz,  $\text{CDCl}_3$ ,  $\delta$ ): 170.35, 170.24, 169.19, 152.11, 150.60, 149.07, 134.49, 128.45, 124.62, 122.24, 117.63, 98.29, 75.57, 70.75, 50.55, 49.63, 47.37, 45.07, 44.15, 43.69, 41.45, 37.68, 36.08, 35.42, 34.88, 34.23, 33.33, 31.27, 29.09, 28.12, 27.32, 27.19, 26.31, 25.68, 23.63, 22.76, 21.53, 21.37, 17.92, 12.26. (+)ESI-HRMS ( $m/z$ ):  $[\text{M} + \text{H}]^+$  737.43954 (error -1.06 ppm). Combustion analysis ( $\text{C}_{42}\text{H}_{61}\text{ClN}_4\text{O}_5 \times 2\text{H}_2\text{O}$ ): calculated C 65.22, H 8.47, N 7.24; found C 64.73, H 8.33, N 7.34. HPLC purity: Method A: RT 1.792, area 99.09 %; method C: RT=13.145, area 95.23 %.

**24-N-[(7-Chloroquinoline-4-yl)amino]ethylamino-3 $\alpha$ -methanesulfonamido-7 $\alpha$ ,12 $\alpha$ -diacetoxy-5 $\beta$ -cholane (38).** Compound **38** was obtained according to procedure described for **36**, using alcohol **34** (503 mg, 0.9 mmol). Column chromatography (flash SP RP column MeOH/ $\text{H}_2\text{O}$  gradient 65:35  $\rightarrow$  9:1, dry flash,  $\text{SiO}_2$ , EA, EA/MeOH gradient 9:1  $\rightarrow$  6:4, EA/MeOH/ $\text{NH}_3 = 18:0.4:0.4 \rightarrow 9:2:2$ , flash chromatography (Biotage SP1 RP column MeOH/ $\text{H}_2\text{O}$  gradient 65:35  $\rightarrow$  9:1). Yield 248 mg (36%). Colorless foam softens at 108-110

$^{\circ}\text{C}$ .  $[\alpha]_{\text{D}}^{20} = +0.151$  ( $c = 1.8 \times 10^{-3}$  g/mL, DCM). IR (KBr): 3289w, 2938m, 2868w, 1729s, 1612w, 1582s, 1538w, 1451w, 1377m, 1318m, 1250s, 1147m, 1080w, 1023w, 968w, 880w, 808w, 763w  $\text{cm}^{-1}$ .  $^1\text{H}$  NMR (200 MHz,  $\text{CDCl}_3$ ,  $\delta$ ): 8.51 (*d*,  $J = 5.1$ , H-C(2')), 7.94 (*d*,  $J = 2.2$ , H-C(8')), 7.74 (*d*,  $J = 9.0$ , H-C(5')), 7.35 (*dd*,  $J_1 = 8.7$ ,  $J_2 = 2.0$ , H-C(6')), 6.38 (*d*,  $J = 5.1$ , H-C(3')), 5.99 (*bs*, H-N, exchangeable with  $\text{D}_2\text{O}$ ), 5.09 (*bs*, H-C(12)), 4.95-4.85 (*m*, H-C(7)), 4.52 (*d*,  $J = 7.4$ , N-H, exchangeable with  $\text{D}_2\text{O}$ ), 3.40-3.30 (*m*, 2H-C(9')), 3.25-2.95 (*m*, H-C(3) and 2H-C(10')), 2.96 (*s*,  $\text{CH}_3\text{-SO}_2\text{N}$ ), 2.60-2.55 (*m*, 2H-C(24)), 2.10 (*s*,  $\text{CH}_3\text{COO}$ ), 2.07 (*s*,  $\text{CH}_3\text{COO}$ ), 1.99 (*bs*, H-N, exchangeable with  $\text{D}_2\text{O}$ ), 0.92 (*s*,  $\text{CH}_3\text{-C}(10)$ ), 0.82 (*d*,  $J = 6.7$ ,  $\text{CH}_3\text{-C}(20)$ ), 0.71 (*bs*,  $\text{CH}_3\text{-C}(13)$ ).  $^{13}\text{C}$  NMR (50 MHz,  $\text{CDCl}_3$ ,  $\delta$ ): 170.49, 170.29, 151.96, 149.92, 134.83, 128.53, 125.19, 121.37, 117.33, 99.10, 75.36, 70.65, 53.97, 49.67, 47.58, 47.38, 44.97, 43.28, 41.84, 41.55, 37.62, 37.31, 35.38, 34.91, 34.01, 33.21, 31.15, 29.35, 28.79, 27.24, 26.55, 25.42, 22.73, 22.56, 21.54, 21.30, 17.85, 12.15.  $^1\text{H}$  NMR (500 MHz,  $\text{CDCl}_3$ ,  $\delta$ ): 8.53 (*d*,  $J = 5.3$ , H-C(2')), 7.96 (*d*,  $J = 2.1$ , H-C(8')), 7.70 (*d*,  $J = 8.9$ , H-C(5')), 7.36 (*dd*,  $J_1 = 8.9$ ,  $J_2 = 2.1$ , H-C(6')), 6.40 (*d*,  $J = 5.3$ , H-C(3')), 5.86 (*bs*, H-N, exchangeable with  $\text{D}_2\text{O}$ ), 5.09 (*bs*, H-C(12)), 4.95-4.85 (*m*, H-C(7)), 4.26 (*d*,  $J = 7.3$ , N-H, exchangeable with  $\text{D}_2\text{O}$ ), 3.40-3.30 (*m*, 2H-C(9')), 3.25-2.95 (*m*, H-C(3)), 3.06-2.99 (*m*, 2H-C(10')), 2.97 (*s*,  $\text{CH}_3\text{-SO}_2\text{N}$ ), 2.68-2.56 (*m*, 2H-C(24)), 2.10 (*s*,  $\text{CH}_3\text{COO}$ ), 2.07 (*s*,  $\text{CH}_3\text{COO}$ ), 0.92 (*s*,  $\text{CH}_3\text{-C}(10)$ ), 0.83 (*d*,  $J = 6.4$ ,  $\text{CH}_3\text{-C}(20)$ ), 0.71 (*bs*,  $\text{CH}_3\text{-C}(13)$ ).  $^{13}\text{C}$  NMR (125 MHz,  $\text{CDCl}_3$ ,  $\delta$ ): 170.41, 170.19, 152.14, 149.85, 149.19, 134.79, 128.83, 125.20, 121.18, 117.38, 99.24, 75.40, 70.68, 54.05, 49.71, 47.67, 47.49, 45.04, 43.36, 41.97, 41.93, 41.62, 37.71, 37.43, 35.44, 34.98, 34.10, 33.32, 31.22, 29.44, 28.86, 27.32, 26.80, 25.50, 22.80, 21.59, 21.37, 17.93, 12.23. (+)ESI-HRMS ( $m/z$ ):  $[\text{M} + \text{H}]^+$  759.39211 (error +0.60 ppm). Combustion analysis for ( $\text{C}_{40}\text{H}_{59}\text{ClN}_4\text{O}_6\text{S} \times 2 \text{H}_2\text{O}$ ): calculated C 60.40, H 7.98, N 7.04, S 4.03 found C 60.39, H 7.84, N 7.20, S 3.95. HPLC purity: Method A: RT 1.884, area 98.92 %; method C: RT 10.467, area 98.11 %.

**24-N-[(7-Chloroquinoline-4-yl)amino]proylamino-3 $\alpha$ -methanesulfonamido-7 $\alpha$ ,12 $\alpha$ -diacetoxy-5 $\beta$ -cholane (39).** Compound **39** was obtained according to procedure described for **36**, using alcohol **34** (496 mg, 0.89 mmol). Column chromatography (dry flash, SiO<sub>2</sub>, EA, EA/MeOH gradient 9:1  $\rightarrow$  6:4, EA/MeOH/NH<sub>3</sub> = 18:0.4:0.4  $\rightarrow$  18:1.4:1.4, flash chromatography Biotage SP1RP column MeOH/H<sub>2</sub>O gradient 75:25  $\rightarrow$  9:1). Yield 221 mg (32 %). Colorless foam softens at 102-105 °C.  $[\alpha]_D^{20} = +0.058$  ( $c = 1.0 \times 10^{-3}$  g/mL, DCM). IR (KBr): 3404m, 3298m, 2936m, 2868m, 1728m, 1611w, 1583s, 1539w, 1449m, 1377m, 1319m, 1249s, 1147m, 1080w, 1023w, 694w, 900w, 880w, 852w, 807w, 762w cm<sup>-1</sup>. <sup>1</sup>H NMR (200 MHz, CDCl<sub>3</sub>,  $\delta$ ): 8.49 (*d*,  $J = 5.1$ , H-C(2')), 7.95-7.85 (*m*, H-C(8') and N-H, exchangeable with D<sub>2</sub>O), 7.74 (*d*,  $J = 9.0$ , H-C(5')), 7.34 (*dd*,  $J_1 = 9.0$ ,  $J_2 = 2.2$ , H-C(6')), 6.31 (*d*,  $J = 5.6$ , H-C(3')), 5.11 (*bs*, H-C(12)), 4.95-4.84 (*m*, H-C(7)), 4.48 (*d*,  $J = 7.3$ , N-H, exchangeable with D<sub>2</sub>O), 3.38 (*bs*, 2H-C(9')), 3.14 (*bs*, H-C(3)), 3.00-2.85 (*m*, CH<sub>3</sub>-SO<sub>2</sub>N and 2H-C(11')), 2.63 (*bs*, 2H-C(24)), 2.10 (*s*, CH<sub>3</sub>COO), 2.02 (*s*, CH<sub>3</sub>COO), 0.92 (*s*, CH<sub>3</sub>-C(10)), 0.86 (*d*,  $J = 6.2$ , CH<sub>3</sub>-C(20)), 0.74 (*bs*, CH<sub>3</sub>-C(13)). <sup>13</sup>C NMR (50 MHz, CDCl<sub>3</sub>,  $\delta$ ): 170.55, 170.37, 152.16, 150.57, 149.12, 134.50, 128.49, 124.59, 122.19, 117.60, 98.25, 75.40, 70.59, 53.99, 50.55, 49.65, 47.40, 44.99, 44.15, 43.46, 41.92, 41.55, 37.60, 37.24, 35.36, 34.89, 34.54, 34.01, 33.29, 31.14, 29.32, 28.90, 28.37, 27.26, 27.17, 26.48, 25.51, 22.69, 22.60, 21.49, 21.34, 17.86, 12.20. (+)ESI-HRMS ( $m/z$ ): [M + H]<sup>+</sup> 773.40793 (error +0.81 ppm). Combustion analysis for (C<sub>41</sub>H<sub>61</sub>ClN<sub>4</sub>O<sub>6</sub>S  $\times$  1.5 H<sub>2</sub>O): calculated C 61.52, H 8.06, N 7.00, S 4.01 found C 61.45, H 8.07, N 7.06, S 3.60. HPLC purity: Method A: RT 1.773, area 98.86 %; method B: RT 1.843, area 98.21 %.

**24-N-Methyl-N-[(7-chloroquinoline-4-yl)amino]propylamino-3 $\alpha$ -methanesulfonamide-7 $\alpha$ ,12 $\alpha$ -diacetoxy-5 $\beta$ -cholane (43).** Compound **43** was obtained according to procedure described for **42**, using amine **39** (100 mg, 0.13 mmol). Yield 72 mg (71%), colorless foam



softness at 80-85 °C.  $[\alpha]_D^{20} = +0.085$  ( $c = 2.0 \times 10^{-3}$  g/mL, DCM). IR (KBr): 3065w, 2947m, 2869m, 2800w, 1731s, 1610w, 1582s, 1539w, 1448w, 1376s, 1320m, 1246s, 1148m, 1080w, 1023w, 971w, 939w, 899w, 850w, 808w, 764w  $\text{cm}^{-1}$ .  $^1\text{H}$  NMR (500 MHz,  $\text{CDCl}_3$ ,  $\delta$ ): 8.50 (*d*,  $J = 5.5$ , H-C(2')), 7.95 (*d*,  $J = 2.1$ , H-C(8')), 7.82 (*bs*, H-N, exchangeable with  $\text{D}_2\text{O}$ ), 7.69 (*d*,  $J = 8.8$ , H-C(5')), 7.34 (*dd*,  $J_1 = 8.8$ ,  $J_2 = 2.1$ , H-C(6')), 6.31 (*d*,  $J = 5.5$ , H-C(3')), 5.06 (*bs*, H-C(12)), 4.91-4.88 (*m*, H-C(7)), 4.39 (*bs*, H-N, exchangeable with  $\text{D}_2\text{O}$ ), 3.42-3.35 (*m*, 2H-C(9')), 3.19-3.10 (*m*, H-C(3)), 2.97 (*s*,  $\text{CH}_3\text{-N}$ ), 2.70-2.61 (*m*, 2H-C(11')), 2.43 (*t*,  $J = 7.6$ , 2H-C(24)), 2.38 (*s*,  $\text{CH}_3\text{-SO}_2\text{N}$ ), 2.06 (*s*,  $\text{CH}_3\text{COO}$ ), 2.05 (*s*,  $\text{CH}_3\text{COO}$ ), 0.91 (*s*,  $\text{CH}_3\text{-C}(10)$ ), 0.78 (*d*,  $J = 6.4$ ,  $\text{CH}_3\text{-C}(20)$ ), 0.68 (*s*,  $\text{CH}_3\text{-C}(13)$ ).  $^{13}\text{C}$  NMR (125 MHz,  $\text{CDCl}_3$ ,  $\delta$ ): 170.41, 170.26, 151.78, 150.78, 148.80, 134.74, 128.19, 124.88, 122.02, 117.55, 98.31, 75.34, 70.62, 58.71, 57.34, 54.02, 47.73, 45.02, 44.04, 43.35, 42.00, 41.97, 41.62, 37.66, 37.34, 35.42, 35.05, 34.06, 33.62, 31.18, 29.39, 28.89, 27.18, 25.50, 24.23, 23.82, 22.72, 22.61, 21.57, 21.31, 17.88, 12.20. (+)ESI-HRMS ( $m/z$ ):  $[\text{M} + \text{H}]^+$  787.42335 (error +0.50 ppm). Combustion analysis for ( $\text{C}_{42}\text{H}_{63}\text{ClN}_4\text{O}_6\text{S} \times 2\text{H}_2\text{O}$ ): calculated C 61.26, H 8.20, N 6.80, S 3.89. Found C 60.91, H 8.08, N 6.80, S 3.98. HPLC purity: Method A: RT 1.879, area 99.37 %; method B: RT 1.866, area 99.37 %.

**24-N-Methyl-N-[(7-chloroquinoline-4-yl)amino]propylamino-3 $\alpha$ -N'-tert-**

**butylcarbamate-7 $\alpha$ ,12 $\alpha$ -diacetoxy-5 $\beta$ -cholane (45).** Into stirred solution of **41** (1.38 g, 1.73 mmol) and formaldehyde (37 %, 581  $\mu\text{L}$ , 20.9 mmol) in DCM (85 mL),  $\text{NaBH}(\text{OAc})_3$  (3.65 g, 17.2 mmol) was added in 3 equal portions in 8 h intervals. Upon completion of the reaction, the reaction mixture was suspended in DCM/ $\text{H}_2\text{O}$  mixture, pH was adjusted to pH 12 with 0.5 M NaOH and transferred to separatory funnel and worked-up in usual manner. Product was isolated after flash column chromatography purification (Biotage SP1, NH column, eluent EA/Hex gradient 6/4  $\rightarrow$  EA, Biotage SP1, RP column, eluent MeOH/ $\text{H}_2\text{O}$

gradient 75/25 → MeOH and RP column MeOH/H<sub>2</sub>O = 95/5). Yield 880.1 mg (63 %). **45**: Colorless foam softens at 108-110 °C.  $[\alpha]_D^{20} = +0.042$  ( $c = 1.6 \times 10^{-3}$  g/mL, DCM). IR (KBr): 3674w, 3430s, 2946m, 2867m, 2800w, 1731s, 1613m, 1581s, 1535m, 1456m, 1372m, 1331w, 1244s, 1170m, 1066w, 1024m, 966w, 850w, 806w, 768w cm<sup>-1</sup>. <sup>1</sup>H NMR (500 MHz, CDCl<sub>3</sub>, δ): 8.49 (*d*,  $J = 4.5$ , H-C(2')), 7.93 (*s*, H-C(8')), 7.86 (*s*, H-N-Boc, exchangeable with D<sub>2</sub>O), 7.62 (*d*,  $J = 8.8$ , H-C(5')), 7.32 (*d*,  $J = 8.6$ , H-C(6')), 6.31 (*d*,  $J = 4.9$ , H-C(3')), 5.06 (*s*, H-C(12)), 4.88 (*s*, H-C(7)), 3.38 (*bs*, 2H-C(9')), 3.27 (*bs*, H-C(3)), 2.61 (*bs*, 2H-C(11')), 2.45-2.31 (*m*, 2H-C(24) and CH<sub>3</sub>-N), 2.05 (*s*, 2xCH<sub>3</sub>COO), 1.44 (*s*, (CH<sub>3</sub>)<sub>3</sub>C-N(Boc)), 0.90 (*s*, CH<sub>3</sub>-C(10)), 0.77 (*d*,  $J = 5.8$ , CH<sub>3</sub>-C(20)), 0.68 (*s*, CH<sub>3</sub>-C(13)). <sup>13</sup>C NMR (125 MHz, CDCl<sub>3</sub>, δ): 170.37, 170.32, 152.06, 150.65, 149.09, 134.59, 128.49, 124.78, 121.90, 117.61, 98.34, 79.18, 75.42, 70.80, 58.93, 57.74, 47.78, 45.01, 44.37, 43.36, 42.23, 41.54, 37.68, 36.38, 35.48, 35.09, 34.65, 34.23, 33.70, 31.27, 30.97, 28.88, 28.41, 27.21, 25.52, 24.28, 24.11, 22.75, 22.70, 21.62, 21.32, 17.90, 12.19. (+)ESI-HRMS ( $m/z$ ):  $[M + H]^+$  809.4978 (error -0.49 ppm). Combustion analysis for C<sub>46</sub>H<sub>69</sub>ClN<sub>4</sub>O<sub>6</sub>: Calculated C 68.25, H 8.59, N 6.92; found C 68.02, H 8.63, N 6.75. HPLC purity: Method C: RT 7.896, area 96.46; method D: RT 5.553, area 96.83 %.

**24-N-Fmoc-N-[(7-Chloroquinoline-4-yl)amino]ethylamino-3 $\alpha$ -N'-tert-butylcarbamate-7 $\alpha$ ,12 $\alpha$ -diacetoxy-5 $\beta$ -cholane (46)**. Mixture of **40** (ST10) (1.07 g, 1.36 mmol) and Fmoc-Su (460 mg, 1.36 mmol) in 32 mL DCM was stirred for 4 h at r.t. Solvent was evaporated under reduced pressure and product was isolated after flash column chromatography purification (Biotage SP1, SiO<sub>2</sub> column, eluent EA/Hex gradient 9/1 → EA). Yield 1.00 g (74 %).

Colorless foam softens at 63-68 °C.  $[\alpha]_D^{20} = +0.036$  ( $c = 1.5 \times 10^{-3}$  g/mL, DCM). IR (ATR): 3351w, 2936m, 2867m, 1704s, 1611w, 1582m, 1522w, 1452m, 1371m, 1239s, 1169m, 1067m, 1022w, 880w, 814w, 741w cm<sup>-1</sup>. <sup>1</sup>H NMR (500 MHz, CDCl<sub>3</sub>, δ): 8.33 (*bs*, H-C(2')),

7.90-7.10 (*m*, Ar), 6.21 (*bs*, H-C(3')), 5.01 (*bs*, H-C(12)), 4.88 (*bs*, H-C(7)), 3.75-3.55 (*m*, H-C(3) and 2H-C(9')), 3.30 (*bs*, 2H-C(10')), 2.95-2.80 (*m*, 2H-C(24)), 2.07 (*s*, CH<sub>3</sub>COO), 2.05 (*s*, CH<sub>3</sub>COO), 1.43 (*s*, (CH<sub>3</sub>)<sub>3</sub>C-N(Boc)), (*s*, CH<sub>3</sub>-C(10)), 0.68 (*d*, *J* = 5.85, CH<sub>3</sub>-C(20)), 0.60 (*s*, CH<sub>3</sub>-C(13)). <sup>13</sup>C NMR (50 MHz, CDCl<sub>3</sub>, δ): 174.15, 170.36, 158.57, 152.47, 148.10, 143.57, 141.36, 137.08, 127.78, 127.03, 126.51, 124.54, 122.57, 120.02, 116.18, 97.54, 75.38, 70.81, 50.80, 47.80, 47.23, 44.99, 43.30, 41.48, 37.65, 36.34, 34.89, 34.21, 32.59, 31.26, 28.77, 28.37, 27.26, 25.42, 22.65, 21.61, 21.38, 19.19, 17.79, 12.20. (+)ESI-HRMS (*m/z*): [M + Na]<sup>+</sup> 1025.51865 (error +2.04 ppm). Combustion analysis for C<sub>44</sub>H<sub>64</sub>ClN<sub>4</sub>O<sub>8</sub>·H<sub>2</sub>O: Calculated C 66.19, H 8.33, N 7.02; found C 65.86, H 5.42, N 6.96.

**24-N-Fmoc-N-[(7-Chloroquinoline-4-yl)amino]propylamino-3α-N'-tert-butylcarbamate-7α,12α-diacetoxy-5β-cholane (47).** Compound **47** was obtained according to procedure described for **46** using **41** (2.24 g, 2.81 mmol) and Fmoc-Su (947.9 mg, 2.81 mmol). Product was isolated after column chromatography purification [dry flash, SiO<sub>2</sub>, eluent EA, EA/MeOH gradient 95/5 → 8/2, flash chromatography (Biotage SP1, RP column, eluent MeOH/H<sub>2</sub>O gradient 9/1 to 95/5, SiO<sub>2</sub> column, eluent EA/Hex gradient 9/1 → EA)]. Yield 2.45 g (86 %). Colorless foam softens at 112-116 °C. [α]<sub>D</sub><sup>20</sup> = + 0.060 (*c* = 1.8×10<sup>-3</sup> g/mL, DCM). IR (KBr): 3394m, 3066w, 2934m, 2868m, 1731s, 1706s, 1611m, 1580s, 1534m, 1479m, 1450m, 1426m, 1372m, 1244s, 1170m, 1135m, 1102w, 1066w, 1024m, 1000w, 966w, 939w, 881w, 851w, 808w cm<sup>-1</sup>. <sup>1</sup>H NMR (200 MHz, CDCl<sub>3</sub>, δ): 8.49 (*d*, *J* = 5.4, H-C(2')), 8.0-7.2 (*m*, Ar), 6.48 (*bs*, H-N-Boc, exchangeable with D<sub>2</sub>O), 6.34 (*d*, *J* = 5.4, H-C(3')), 5.09 (*bs*, H-C(12)), 4.91 (*bs*, H-C(7)), 4.65 (*d*, *J* = 5.6, CH<sub>2</sub>CH (Fmoc)), 4.23 (*t*, *J* = 5.6, CH<sub>2</sub>CH(Fmoc)), 3.50-2.80 (*m*, 2H-C(9'), 2H-C(11'), 2H-C(24) and H-C(3)), 2.37 (*s*, H-N, exchangeable with D<sub>2</sub>O), 2.11 (*s*, CH<sub>3</sub>COO), 2.05 (*s*, CH<sub>3</sub>COO), 1.45 (*s*, (CH<sub>3</sub>)<sub>3</sub>C-N(Boc)), 0.91 (*s*, CH<sub>3</sub>-C(10)), 0.75 (*d*, *J* = 6.0 CH<sub>3</sub>-C(20)), 0.71 (*s*, CH<sub>3</sub>-C(13)). <sup>13</sup>C NMR

(50 MHz, CDCl<sub>3</sub>,  $\delta$ ): 170.37, 170.29, 157.17, 155.15, 151.85, 149.85, 149.19, 143.86, 141.38, 134.83, 128.42, 127.67, 127.03, 125.23, 124.59, 121.85, 119.93, 98.21, 79.20, 75.38, 70.79, 66.86, 50.75, 47.45, 44.96, 43.86, 43.32, 41.44, 38.62, 37.60, 36.31, 35.40, 34.78, 34.16, 32.59, 31.23, 28.79, 28.35, 27.22, 26.06, 25.44, 25.11, 22.62, 21.58, 21.34, 17.73, 14.11, 12.16. (+)ESI-HRMS ( $m/z$ ): [M + H]<sup>+</sup> 1017.5503 (error +1.39 ppm). Combustion analysis for C<sub>44</sub>H<sub>66</sub>ClN<sub>4</sub>O<sub>8</sub>×H<sub>2</sub>O: Calculated C 68.03, H 8.37, N 7.05; found C 67.86, H 8.42, N 7.96.

**24-N-Fmoc-N-[(7-Chloroquinoline-4-yl)amino]ethylamino-3 $\alpha$ -amino-7 $\alpha$ ,12 $\alpha$ -diacetoxy-5 $\beta$ -cholane (48).** Compound **46** (946 mg, 0.94 mmol) was stirred at r.t. in DCM/ TFA mixture (13 mL, 3:1, v/v) for 4 h. Solvent was removed under reduced pressure; the residue was transferred as DCM solution to separatory funnel and worked-up in usual manner. Crude product 817 mg was forwarded to the next reaction step without additional purification.

**24-N-Fmoc-N-[(7-Chloroquinoline-4-yl)amino]propylamino-3 $\alpha$ -amino-7 $\alpha$ ,12 $\alpha$ -diacetoxy-5 $\beta$ -cholane (49).** Compound **47** (1.26 g, 1.24 mmol) was stirred at r.t. in DCM/ TFA mixture (20 mL, 1:1, v/v) for 95 min. Solvent was removed under reduced pressure, and the residue was transferred as DCM solution to separatory funnel and worked-up in usual manner. Product was isolated after column chromatography purification. Yield 1.10 g (96 %). Colorless foam softens at 88-91 °C.  $[\alpha]_D^{20} = +0.025$  (c = 1.6×10<sup>-3</sup> g/mL, DCM). IR (KBr): 3409m, 3065w, 2942m, 2864m, 1728s, 1610m, 1581s, 1538m, 1449m, 1427m, 1376m, 1330m, 1244s, 1136m, 1077m, 1024m, 964w, 897w, 850w cm<sup>-1</sup>. <sup>1</sup>H NMR (200 MHz, CDCl<sub>3</sub>,  $\delta$ ): 8.48 (*d*, *J* = 5.3, H-C(2')), 8.00-7.20 (*m*, Ar), 6.48 (*bs*, H-N, exchangeable with D<sub>2</sub>O), 6.29 (*m*, H-C(3')), 5.07 (*bs*, H-C(12)), 4.89 (*bs*, H-C(7)), 4.64 (*d*, *J* = 5.6, CH<sub>2</sub>CH-C(Fmoc)), 4.23 (*t*, *J* = 5.6, CH<sub>2</sub>CH(Fmoc)), 3.40-2.80 (*m*, 2H-C(9'), 2H-C(11') and 2H-C(24)), 2.70-

2.50 (*m*, H-N and H-C(3)), 2.12 (*s*, CH<sub>3</sub>COO), 2.07 (*s*, CH<sub>3</sub>COO), 0.90 (*s*, CH<sub>3</sub>-C(10)), 0.78-0.64 (*m*, CH<sub>3</sub>-C(20) and CH<sub>3</sub>-C(13)). <sup>13</sup>C NMR (50 MHz, CDCl<sub>3</sub>, δ): 223.59, 170.66, 151.85, 150.58, 149.19, 143.88, 141.40, 134.85, 128.69, 128.36, 127.67, 127.03, 125.25, 124.59, 122.15, 120.95, 119.93, 119.68, 117.55, 107.73, 98.21, 75.43, 70.85, 66.88, 51.58, 50.47, 49.43, 47.77, 47.49, 44.99, 43.92, 43.34, 41.42, 39.31, 37.70, 35.43, 34.81, 34.32, 33.28, 32.63, 31.37, 28.92, 27.24, 26.48, 25.53, 22.72, 21.61, 21.45, 17.71, 12.18. (+)ESI-HRMS (*m/z*): [M + H]<sup>+</sup> 917.4978 (error -0.93 ppm). Combustion analysis for C<sub>55</sub>H<sub>69</sub>ClN<sub>4</sub>O<sub>6</sub>×H<sub>2</sub>O: Calculated C 70.60, H 7.65, N 5.99; found C 70.48, H 7.42, N 6.01.

**24-N-[(7-Chloroquinoline-4-yl)amino]propylamino-3α-N',N'-dimethylamino-7α,12α-**

**diacetoxy-5β-cholane (51).** To a stirred mixture of **49** (589 mg, 0.64 mmol) and formaldehyde (37%, 0.3 mL, 4.04 mmol) in dry methanol (20 mL) at r.t. was added a suspension of anhydrous ZnCl<sub>2</sub> (87 mg, 0.64 mmol) and NaBH<sub>3</sub>CN (81 mg, 1.28 mmol) in dry methanol (20 mL). After 24 h of stirring at r.t. the solvent was removed under reduced pressure, and the residue was transferred into separatory funnel as DCM solution, water was added and pH was adjusted to pH 12 with 0.1 M NaOH. Then, the layers were separated, water layer was extracted with DCM (2×15 mL), combined organic layers were washed with sat. NaHCO<sub>3</sub> and brine and dried over anhydrous Na<sub>2</sub>SO<sub>4</sub>. Solution was filtered off, solvent removed under reduced pressure and crude product (584 mg) was dissolved in solution of piperidine in DCM (20 %, 25 mL). After stirring at r.t. the solvent was removed under reduced pressure, transferred to separatory funnel as DCM solution and worked-up in a usual manner. After column chromatography [dry flash, SiO<sub>2</sub>, eluent MeOH, MeOH/NH<sub>3</sub> gradient 99/1 → 94/6, flash chromatography (Biotage SP1, SiO<sub>2</sub> column, eluent MeOH/NH<sub>3</sub> gradient 98/2 → 95/5, and N-H column, eluent EA/ether = 9/1, EA, gradient EA/MeOH 95/5 → 9/1)] **51** (130.7 mg, 28 %) and **57** (26.3 mg, 6 %) was isolated. **51**: colorless foam softens at 78-82

°C.  $[\alpha]_D^{20} = +0.140$  ( $c = 1.8 \times 10^{-3}$  g/mL, DCM). IR (KBr): 3426s, 2936m, 2868m, 1730m, 1613m, 1582s, 1451m, 1376m, 1331w, 1244s, 1163w, 1140w, 1070w, 1026m, 966w, 899w, 877w, 851w  $\text{cm}^{-1}$ .  $^1\text{H}$  NMR (500 MHz,  $\text{CDCl}_3$ ,  $\delta$ ): 8.48 (*d*,  $J = 5.5$ , H-C(2')), 7.93 (*d*,  $J = 2.2$ , H-C(8')), 7.83 (*d*,  $J = 9.0$ , H-C(5')), 7.32 (*dd*,  $J_1 = 8.9$ ,  $J_2 = 2.1$ , H-C(6')), 6.30 (*d*,  $J = 5.5$ , H-C(3')), 5.09 (*bs*, H-C(12)), 4.93 (*bs*, H-N, exchangeable with  $\text{D}_2\text{O}$ ), 4.92-4.87 (*m*, H-C(7)), 3.41 (*t*,  $J = 5.9$ , 2H-C(9')), 2.95 (*t*,  $J = 5.7$ , 2H-C(11')), 2.75-2.61 (*m*, 2H-C(24)), 2.35 (*s*, 2 $\text{CH}_3$ -N), 2.23-2.13 (*m*, H-C(3)), 2.10 (*s*,  $\text{CH}_3\text{COO}$ ), 2.07 (*s*,  $\text{CH}_3\text{COO}$ ), 0.91 (*s*,  $\text{CH}_3$ -C(10)), 0.83 (*d*,  $J = 6.5$ ,  $\text{CH}_3$ -C(20)), 0.71 (*s*,  $\text{CH}_3$ -C(13)).  $^{13}\text{C}$  NMR (125 MHz,  $\text{CDCl}_3$ ,  $\delta$ ): 170.53, 170.48, 151.51, 150.71, 148.53, 134.90, 127.95, 124.94, 122.29, 117.48, 98.26, 75.40, 70.82, 64.71, 50.00, 48.53, 47.66, 45.04, 43.32, 43.14, 41.65, 41.04, 37.73, 35.54, 34.99, 34.38, 33.26, 32.61, 31.47, 28.86, 27.28, 26.54, 25.93, 25.42, 23.19, 23.06, 22.77, 22.65, 21.54, 21.34, 17.86, 12.21. (+)ESI-HRMS ( $m/z$ ):  $[\text{M} + \text{H}]^+$  723.4611 (error -1.19 ppm). Combustion analysis for  $\text{C}_{42}\text{H}_{63}\text{ClN}_4\text{O}_4$ : Calculated C 69.73, H 8.78, N 7.74; found C 70.12, H 8.98, N 7.68. HPLC purity: Method A: RT 1.804, area 97.63 %; method C: RT 12.462, area 95.41 %.

**24-N-[(7-Chloroquinoline-4-yl)amino]propylamino-3 $\alpha$ -amino-7 $\alpha$ ,12 $\alpha$ -diacetoxy-5 $\beta$ -**

**cholane (53).** Compound **41** (260 mg, 0.326 mmol) was stirred at r.t. in DCM/ TFA mixture (5 mL, 1:1, v/v) for 90 min. Solvent was removed under reduced pressure, and the residue was transferred as DCM solution to separatory funnel and worked-up in a usual manner.

Yield 187 mg (82 %). Colorless foam softens at 79–82 °C.  $[\alpha]_D^{20} = +0.084$  ( $c = 1.4 \times 10^{-3}$  g/mL, DCM). IR (KBr): 3410m, 2940m, 2866m, 1730m, 1611m, 1582s, 1542m, 1450m, 1377m, 1332w, 1244s, 1138w, 1079w, 1026w, 965w, 898w, 852w  $\text{cm}^{-1}$ .  $^1\text{H}$  NMR (500 MHz,  $\text{CDCl}_3$ ,  $\delta$ ): 8.48 (*d*,  $J = 5.3$ , H-C(2')), 7.93 (*d*,  $J = 1.9$ , H-C(8')), 7.82 (*bs*, H-N, exchangeable with  $\text{D}_2\text{O}$ ), 7.73 (*d*,  $J = 9.0$ , H-C(5')), 7.31 (*dd*,  $J_1 = 8.8$ ,  $J_2 = 2.1$ , H-C(6')), 6.29 (*d*,  $J = 5.4$ ,

H-C(3')), 5.10 (*bs*, H-C(12)), 4.92-4.85 (*m*, H-C(7)), 3.38 (*t*,  $J = 5.7$ , 2H-C(9')), 2.97-2.87 (*m*, 2H-C(11')), 2.75-2.55 (*m*, 2H-C(24) and H-C(3)), 2.11 (*s*, CH<sub>3</sub>COO), 2.04 (*s*, CH<sub>3</sub>COO), 0.90 (*s*, CH<sub>3</sub>-C(10)), 0.85 (*d*,  $J = 6.6$ , CH<sub>3</sub>-C(20)), 0.73 (*s*, CH<sub>3</sub>-C(13)). <sup>13</sup>C NMR (125 MHz, CDCl<sub>3</sub>,  $\delta$ ): 170.64, 151.98, 150.60, 148.90, 134.64, 128.25, 124.69, 122.15, 117.52, 98.21, 75.49, 70.85, 51.64, 50.49, 49.42, 47.54, 45.03, 43.91, 43.46, 41.49, 39.41, 37.73, 35.51, 34.96, 34.31, 33.33, 31.38, 31.18, 29.01, 27.28, 27.13, 26.54, 25.59, 22.76, 21.57, 21.44, 17.87, 12.21. (+)ESI-HRMS ( $m/z$ ): [M + H]<sup>+</sup> 695.4280 (error -2.49 ppm). Combustion analysis for C<sub>40</sub>H<sub>59</sub>ClN<sub>4</sub>O<sub>4</sub>×0.5H<sub>2</sub>O: Calculated C 68.21, H 8.59, N 7.95; found C 68.01, H 8.54, N 7.64. HPLC purity: Method C: RT 11.493, area 97.92%; method D: RT 5.137, area 97.997 %.

**24-N-Methyl-N-[(7-chloroquinoline-4-yl)amino]propylamino-3 $\alpha$ -amino-7 $\alpha$ ,12 $\alpha$ -**

**diacetoxy-5 $\beta$ -cholane (55).** Compound **45** (133 mg, 0.164 mmol) was stirred at r.t. in DCM/TFA mixture (2.5 mL, 1:1, v/v) 3 h. Solvent was removed under reduced pressure, and the residue was transferred as DCM solution into separatory funnel and worked-up in a usual manner. Product was isolated after column chromatography (dry flash, SiO<sub>2</sub>, eluent EA, EA/MeOH gradient 9/1  $\rightarrow$  7/3, gradient EA/MeOH/NH<sub>3</sub> 18 / 0.2 / 0.2  $\rightarrow$  18 / 1.4 / 1.4). Yield 41 mg (35 %). Colorless foam softens at 75-77 °C.  $[\alpha]_D^{20} = +0.090$  ( $c = 2.0 \times 10^{-3}$  g/mL, DCM). IR (KBr): 3408m, 2939s, 2865m, 1731m, 1611m, 1582s, 1542m, 1452m, 1377m, 1332m, 1243s, 1158w, 1137m, 1026m, 966w, 898w, 850w, 807w cm<sup>-1</sup>. <sup>1</sup>H NMR (500 MHz, CDCl<sub>3</sub>,  $\delta$ ): 8.50 (*d*,  $J = 5.5$ , H-C(2')), 7.94 (*d*,  $J = 2$ , H-C(8')), 7.82 (*bs*, 2H-N, exchangeable with D<sub>2</sub>O), 7.70 (*d*,  $J = 8.9$ , H-C(5')), 7.33 (*dd*,  $J_1 = 8.9$ ,  $J_2 = 2.2$ , H-C(6')), 6.31 (*d*,  $J = 5.5$ , H-C(3')), 5.06 (*s*, H-C(12)), 4.87 (*d*,  $J = 2.6$ , H-C(7)), 3.38 (*t*,  $J = 5.7$ , 2H-C(9')), 2.81 (*bs*, 2H-N, exchangeable with D<sub>2</sub>O), 2.70-2.57 (*m*, 2H-C(11') and H-C(3)), 2.48-2.40 (*m*, 2H-C(24)), 2.38 (*s*, CH<sub>3</sub>-N), 2.08 (*s*, CH<sub>3</sub>COO), 2.07 (*s*, CH<sub>3</sub>COO), 0.90 (*s*, CH<sub>3</sub>-C(10)), 0.78 (*d*,

$J = 6.5$ , CH<sub>3</sub>-C(20)), 0.68 (*s*, CH<sub>3</sub>-C(13)). <sup>13</sup>C NMR (125 MHz, CDCl<sub>3</sub>,  $\delta$ ): 170.64, 151.74, 150.80, 148.76, 134.79, 128.16, 124.93, 122.02, 117.55, 98.29, 75.45, 70.86, 58.63, 57.30, 51.57, 47.81, 45.05, 43.96, 43.38, 41.89, 41.89, 39.11, 37.76, 35.50, 35.09, 34.36, 33.63, 31.40, 30.92, 28.98, 27.23, 25.58, 24.20, 23.77, 22.79, 22.67, 21.63, 21.42, 17.87, 12.21. (+)ESI-HRMS ( $m/z$ ):[M +H]<sup>+</sup> 709.4454 (error -0.68 ppm). Combustion analysis for C<sub>41</sub>H<sub>61</sub>ClN<sub>4</sub>O<sub>4</sub>: Calculated C 67.70, H 8.73, N 7.70; found C 67.65, H 8.83, N 7.60. HPLC purity: Method A: RT 2.240, area 96.94 %; method B: RT 1.792, area 98.41 %.

**24-N-Methyl-N-[(7-chloroquinoline-4-yl)amino]propylamino-3 $\alpha$ -N',N'-dimethylamino-7 $\alpha$ ,12 $\alpha$ -diacetoxy-5 $\beta$ -cholane (57).** Mixture of **55** (453.8 mg, 0.64 mmol) and formaldehyde (37 %, 0.48 mL, 6.43 mmol) in 3 mL of CH<sub>3</sub>CN was stirred at r.t. for 20 min. Then, NaBH<sub>3</sub>CN (122 mg, 1.94 mmol) was added and which was after 30 min followed by glac. AcOH (0.7 mL, pH = 6). After 72 h the solvent was removed under reduced pressure, and the obtained crude was transferred into separatory funnel as DCM solution, water was added and pH was adjusted to pH 12 with 0.1 M NaOH and the reaction mixture was further worked-up in usual manner. Product was isolated after column chromatography [dry flash, SiO<sub>2</sub>, eluent EA, EA/MeOH gradient 9/1  $\rightarrow$  1/1, EA/MeOH/NH<sub>3</sub> gradient 18/ 0.2 / 0.2  $\rightarrow$  18/ 3.4 / 3.4), flash chromatography (Biotage SP1 RP column, eluent MeOH/H<sub>2</sub>O gradient 7/3  $\rightarrow$  MeOH and NH column, eluent EA/Hex gradient 7/3  $\rightarrow$  EA)]. Yield 59 mg (13 %). Colorless foam softens at 73-76 °C.  $[\alpha]_D^{20} = +0.049$  ( $c = 1.8 \times 10^{-3}$  g/mL, DCM). IR (KBr): 3431s, 2925m, 2868m, 1731m, 1613m, 1582s, 1452m, 1379m, 1244m, 1125m, 1028m, 607m cm<sup>-1</sup>. <sup>1</sup>H NMR (500 MHz, CDCl<sub>3</sub>,  $\delta$ ): 8.50 (*d*,  $J = 5.2$ , H-C(2')), 7.93 (*d*,  $J = 2.0$ , H-C(8')), 7.82 (*bs*, H-N, exchangeable with D<sub>2</sub>O), 7.64 (*d*,  $J = 8.9$ , H-C(5')), 7.32 (*dd*,  $J_1 = 8.9$ ,  $J_2 = 2.1$ , H-C(6')), 6.31 (*d*,  $J = 5.4$ , H-C(3')), 5.06 (*bs*, H-C(12)), 4.88 (*d*,  $J = 2.5$ , H-C(7)), 3.42-3.35 (*m*, 2H-C(9')), 2.63 (*t*,  $J = 5.5$ , 2H-C(11')), 2.41 (*t*,  $J = 6.5$ , 2H-C(24)), 2.37 (*s*, CH<sub>3</sub>-N), 2.31 (*s*, (CH<sub>3</sub>)<sub>2</sub>N-C(3)), 2.07 (*s*, CH<sub>3</sub>COO), 2.06 (*s*, CH<sub>3</sub>COO), 0.90 (*s*, CH<sub>3</sub>-C(10)), 0.78 (*d*,  $J = 6.6$ ,



CH<sub>3</sub>-C(20)), 0.68 (*s*, CH<sub>3</sub>-C(13)). <sup>13</sup>C NMR (125 MHz, CDCl<sub>3</sub>, δ): 170.60, 170.56, 152.00, 150.68, 149.04, 134.65, 128.45, 124.83, 121.91, 117.60, 98.34, 75.44, 70.88, 64.97, 58.82, 57.64, 47.85, 45.04, 44.24, 43.29, 42.09, 41.74, 41.68, 37.74, 35.66, 35.14, 34.41, 33.68, 32.22, 31.53, 28.89, 27.22, 25.44, 24.27, 24.03, 23.59, 22.76, 22.71, 21.63, 21.37, 17.88, 12.20. (+)ESI-HRMS (*m/z*): [M + H]<sup>+</sup> 737.4767 (error -0.43 ppm). Combustion analysis for C<sub>43</sub>H<sub>65</sub>ClN<sub>4</sub>O<sub>4</sub>: Calculated C 70.03, H 8.88, N 7.60; found C 69.82, H 8.60, N 7.63.

Higher yields were obtained when **57** was prepared starting from **51** (59 mg, 0.08 mmol) according to procedure described for **56**. Column purification: dry-flash, SiO<sub>2</sub> column, eluent EA/MeOH gradient 9:1 → 3:7, MeOH, eluent MeOH/NH<sub>3</sub> conc. gradient 3.9:0.1 → 3.5:0.5; flash Biotage SP1, NH column, eluent EA/hexane gradient 8:2 → EA. Yield 58 mg (93%). HPLC purity: Method C: RT 9.682, area 95.17 %; method D: RT 5.092, area 98.86 %.

***N,N*-di(3*α*-Amino-7*α*,12*α*-diacetoxy-5*β*-cholan-24-yl)-*N'*-(7'-chloroquinoline-4'-yl)-1,3-propanediamine (61).** Compound **61** was obtained according to procedure described for **60** using **59** (656 mg, 0.484 mmol). After 5 h the solvent was removed under reduced pressure, and the residue was transferred as DCM solution to separatory funnel and worked-up in a usual manner. Product was isolated after column chromatography procedure (dry flash, SiO<sub>2</sub>, eluent EA, EA/MeOH gradient 9/1 → 7/3 and EA/MeOH/NH<sub>3</sub> gradient 18 / 0.2 / 0.2 → 18 / 1.7 / 1.7). Yield 511 mg (91 %). Colorless foam softens at 113-117 °C. [α]<sub>D</sub><sup>20</sup> = +0.065 (c = 2.1 × 10<sup>-3</sup> g/mL, DCM). IR (KBr): 3752w, 3402m, 2948m, 2856m, 1731s, 1668s, 1613m, 1581s, 1540w, 1452m, 1379s, 1245s, 1137w, 1024m, 965w, 851w cm<sup>-1</sup>. <sup>1</sup>H NMR (200 MHz, CDCl<sub>3</sub>, δ): 8.49 (*d*, *J* = 5,1, H-C(2')), 7.92 (*d*, *J* = 1.7, H-C(8')), 7.80 (*bs*, H-N, exchangeable with D<sub>2</sub>O), 7.68 (*d*, *J* = 9.0, H-C(5')), 7.33 (*dd*, *J*<sub>1</sub> = 9.0, *J*<sub>2</sub> = 1.7, H-C(6')), 6.32 (*d*, *J* = 5.6, H-C(3')), 5.73 (*bs*, 2 × NH<sub>2</sub>, exchangeable with D<sub>2</sub>O), 5.06 (*bs*, 2 × H-C(12)), 4.87 (*bs*, 2 × H-C(7)), 3.36 (*bs*, 2H-C(9')), 2.72-2.36 (*m*, 2H-C(11'), 2 × H-C(3) and 2 × 2H-C(24)), 2.07 (*s*, CH<sub>3</sub>COO), 2.05 (*s*, CH<sub>3</sub>COO), 2.02 (*s*, CH<sub>3</sub>COO), 0.90 (*s*, 2 × CH<sub>3</sub>-C(10)), 0.75 (*d*, *J* = 6.2,

2×CH<sub>3</sub>-C(20)), 0.67 (*s*, 2×CH<sub>3</sub>-C(13)). <sup>13</sup>C NMR (50 MHz, CDCl<sub>3</sub>, δ): 172.77, 170.69, 170.53, 170.49, 152.07, 150.54, 149.06, 134.57, 128.42, 124.61, 122.03, 117.49, 98.37, 75.42, 70.85, 54.90, 54.22, 51.56, 47.83, 44.96, 44.45, 43.30, 41.41, 39.29, 37.64, 35.42, 35.03, 34.85, 34.27, 33.65, 31.34, 31.06, 28.92, 28.13, 27.15, 25.49, 24.38, 23.58, 23.00, 22.73, 22.56, 21.60, 21.38, 17.75, 12.13. <sup>1</sup>H NMR (500 MHz, CDCl<sub>3</sub>, δ): 8.50 (*d*, *J* = 5.3, H-C(2')), 7.93 (*d*, *J* = 2.1, H-C(8')), 7.74-7.63 (*m*, H-N, exchangeable with D<sub>2</sub>O and H-C(5')), 7.33 (*dd*, *J*<sub>1</sub> = 8.8, *J*<sub>2</sub> = 2.2, H-C(6')), 6.31 (*d*, *J* = 5.5, H-C(3')), 5.05 (*bs*, 2×H-C(12)), 4.87 (*bs*, 2×H-C(7)), 3.36 (*bs*, 2H-C(9')), 2.72-2.54 (*m*, 2H-C(11')), 2×H-C(3), 2.52-2.40 (*m*, 2×2H-C(24)), 2.06 (*s*, CH<sub>3</sub>COO), 2.05 (*s*, CH<sub>3</sub>COO), 2.02 (*s*, CH<sub>3</sub>COO), 0.90 (*s*, 2×CH<sub>3</sub>-C(10)), 0.75 (*d*, *J* = 6.0, 2×CH<sub>3</sub>-C(20)), 0.67 (*s*, 2×CH<sub>3</sub>-C(13)). <sup>13</sup>C NMR (125 MHz, CDCl<sub>3</sub>, δ): 170.64, 170.60, 152.14, 150.50, 149.17, 134.58, 128.58, 124.63, 121.96, 117.54, 98.43, 75.46, 70.89, 54.96, 55.30, 53.39, 51.66, 47.91, 45.04, 44.48, 43.38, 41.52, 39.51, 37.74, 35.53, 35.11, 34.36, 33.74, 31.43, 31.27, 29.66, 28.99, 27.22, 25.58, 24.54, 23.66, 22.80, 22.76, 21.65, 21.42, 21.26, 17.85, 12.20. (+)ESI-HRMS (*m/z*): [M + H]<sup>+</sup> 1154.7660 (error +1.22 ppm). Combustion analysis for C<sub>68</sub>H<sub>104</sub>ClN<sub>5</sub>O<sub>8</sub>×H<sub>2</sub>O: Calculated C 69.62, H 9.11, N 5.97; found C 69.39, H 9.27, N 5.91. HPLC purity: Method C: RT = 10.553, area 95.61 %; method D: RT 5.288, area 95.46 %.

***N,N'*-{4'-[(7-Chloroquinoline-4-yl)amino]propyl}-7 $\alpha$ ,12 $\alpha$ -diacetoxy-3,24-diamine (63**, mixture of diastereoisomers). Compound **63** was obtained according to procedure described for **62** using **23** (852 mg, 1.23 mmol), ACQ3 (579 mg, 2.46 mmol) and NaBH<sub>3</sub>CN (107 mg, 1.71 mmol). Column chromatography dry flash, SiO<sub>2</sub>, eluent gradient EtOAc → EtOAc/MeOH = 1:9 → MeOH, gradient EtOAc/MeOH/NH<sub>3</sub> = 18:1:1 → EtOAc/MeOH/NH<sub>3</sub> = 9:1:1, flash chromatography Biotage SP1 RP, gradient MeOH/H<sub>2</sub>O = 8:2 → 9:1. Yield 286 mg, 26 %. Colorless solid, [ $\alpha$ ]<sub>D</sub><sup>20</sup> = +0.041 (*c* = 1.1×10<sup>-3</sup> g/mL, DCM). IR (KBr): 3405m, 2930s, 2863w, 1728m, 1610w, 1582s, 1538w, 1450w, 1372w, 1331w, 1246m, 1170w,

1137w, 1077w, 1023w, 963w, 900w, 878w, 852w, 805w, 766w  $\text{cm}^{-1}$ .  $^1\text{H}$  NMR (500 MHz,  $\text{CD}_3\text{OD}$ ,  $\delta$ ): 8.34 (*d*,  $J = 5.7$ ,  $2\times\text{H-C}(2')$ ), 8.10-8.02 (*m*,  $2\times\text{H-C}(5')$ ), 7.79-7.76 (*m*,  $2\times\text{H-C}(8')$ ), 7.41-7.34 (*m*,  $2\times\text{H-C}(6')$ ), 6.54-6.48 (*m*,  $2\times\text{H-C}(3')$ ), 5.08-5.02 (*bs*,  $\text{H-C}(12)$ ), 4.85 (*bs*,  $\text{H-C}(7)$  covered with methanol signal), 3.41 (*t*,  $J = 6.7$ ,  $2\times\text{H-C}(9')$ ), 2.84 (*bs*,  $\text{H}\alpha\text{-C}(3)$ ), 2.81-2.65 (*m*,  $2\times\text{H-C}(11')$ ), 2.75-2.50 (*m*,  $2\text{H-C}(24)$ ), 2.06 (*s*,  $\text{CH}_3\text{COO}$ ), 2.02 (*s*,  $\text{CH}_3\text{COO}$ ), 0.92 (*s*,  $\text{CH}_3\text{-C}(10)$ , one isomer), 0.88 (*s*,  $\text{CH}_3\text{-C}(10)$ , second isomer), 0.85-0.78 (*m*,  $\text{CH}_3\text{-C}(20)$ ), 0.73 (*s*,  $\text{CH}_3\text{-C}(13)$  one isomer), 0.72 (*s*,  $\text{CH}_3\text{-C}(13)$ , second isomer).  $^{13}\text{C}$  NMR (125 MHz,  $\text{CD}_3\text{OD}$ ,  $\delta$ ): 172.37, 152.86, 152.82, 152.64, 149.86, 136.44, 127.83, 126.12, 124.44, 118.96, 99.79, 77.35, 72.86, 54.15, 51.38, 46.41, 46.37, 44.88, 42.89, 42.57, 39.09, 37.24, 36.39, 34.61, 34.17, 32.33, 31.20, 29.97, 29.27, 29.03, 28.42, 27.00, 26.80, 25.40, 23.995, 23.95, 23.26, 21.59, 21.37, 18.58, 12.71 (+)ESI-HRMS ( $m/z$ ):  $[\text{M} + 2\text{H}]^{2+}$  457.24877 (error -0.62 ppm),  $[\text{M} + \text{H}]^+$  913.49058 (error -0.28 ppm). Combustion analysis  $\text{C}_{52}\text{H}_{70}\text{Cl}_2\text{N}_6\text{O}_4 \times \text{H}_2\text{O}$ : Calculated C 67.01, H 7.79, N 9.02; found C 66.95, H 7.99, N 9.07. HPLC purity: Method C: RT1 5.533, RT2 8.731, area 95.07 %; method D: RT1 5.495, RT2 5.495, area 99.55 %.

***N,N'*-{4'-[(7-Chloroquinoline-4-yl)amino]butyl}-7 $\alpha$ ,12 $\alpha$ -diacetoxy-3 $\beta$ ,24-diamine (64).**

Compound **64** was obtained according to procedure described for **62**, using **24** (150 mg, 0.21 mmol), ACQ4 (105 mg, 0.42 mmol) and  $\text{NaBH}_3\text{CN}$  (22 mg, 0.34 mmol). Column chromatography dry flash,  $\text{SiO}_2$ , gradient  $\text{EtOAc} \rightarrow \text{EtOAc/MeOH} = 3:7 \rightarrow \text{MeOH} \rightarrow \text{EtOAc/MeOH/NH}_3 = 18:1:1$ , flash chromatography Biotage SP1 NH column, eluent  $\text{EtOAc/MeOH}$  and  $\text{DCM/MeOH}$ . Yield 16 mg (8%) **64** and 10 mg (5%) of unresolvable mixture of epimers. **64**: Colorless solid,  $[\alpha]_{\text{D}}^{20} = +0.046$  ( $c = 1.6 \times 10^{-3}$  g/mL, MeOH). IR (film): 3898w, 3738w, 3670w, 3646w, 3612w, 3304m, 2942m, 2868w, 2280w, 1721m, 1610w, 1582s, 1540w, 1451w, 1371m, 1332w, 1247m, 1136w, 1078w, 1024w, 900w, 878w,

851w, 806w, 731w  $\text{cm}^{-1}$ .  $^1\text{H}$  NMR (500 MHz,  $\text{CD}_3\text{OD}$ ,  $\delta$ ): 8.35-8.30 (*m*,  $2\times\text{H-C}(2')$ ), 8.12-8.05 (*m*,  $2\times\text{H-C}(8')$ ), 7.79-7.74 (*m*,  $2\times\text{H-C}(5')$ ), 7.41-7.35 (*m*,  $2\times\text{H-C}(6')$ ), 6.53-6.47 (*m*,  $2\times\text{H-C}(3')$ ), 5.06 (*bs*,  $\text{H-C}(12)$ ), 4.86 (*bs*,  $\text{H-C}(7)$ , covered with  $\text{CD}_3\text{OD}$ ), 3.40-3.34 (*m*,  $2\times\text{H-C}(9')$ ), 2.84 (*bs*,  $\text{H}\alpha\text{-C}(3)$ ), 2.67-2.62 (*m*,  $2\text{H-C}(12')$ ), 2.61-2.56 (*m*,  $2\text{H-C}(12')$ ), 2.55-2.45 (*m*,  $2\text{H-C}(24)$ ), 2.07 (*s*,  $\text{CH}_3\text{COO}$ ), 2.03 (*s*,  $\text{CH}_3\text{COO}$ ), 0.93 (*s*,  $\text{CH}_3\text{-C}(10)$ ), 0.82 (*d*,  $J = 6.6$ ,  $\text{CH}_3\text{-C}(20)$ ), 0.72 (*s*,  $\text{CH}_3\text{-C}(13)$ ).  $^{13}\text{C}$  NMR (125 MHz,  $\text{CD}_3\text{OD}$ ,  $\delta$ ): 172.40, 172.36, 152.84, 152.59, 149.86, 136.42, 127.78, 126.07, 124.46, 118.93, 99.79, 77.33, 72.85, 54.07, 51.19, 50.37, 48.03, 46.36, 44.84, 43.98, 43.93, 39.09, 37.18, 36.37, 35.97, 34.57, 34.03, 32.33, 31.15, 29.96, 28.44, 28.25, 28.00, 27.45, 27.28, 26.83, 26.78, 25.24, 23.97, 23.26, 21.59, 21.38, 18.56, 12.71. (+)ESI-HRMS ( $m/z$ ):  $[\text{M} + 2\text{H}]^{2+}$  471.26355 (error -2.46 ppm),  $[\text{M} + \text{H}]^+$  941.51879 (error -3.55 ppm). Combustion analysis  $\text{C}_{54}\text{H}_{74}\text{Cl}_2\text{N}_6\text{O}_4 \times \text{H}_2\text{O}$ : Calculated C 67.55, H 7.98, N 8.75; found C 67.25, H 7.89, N 8.53. HPLC purity: Method C: RT 8.807, area 97.79 %; method D: RT 5.135, area 99.23 %.

***N,N'*-{4'-[(7-Chloroquinoline-4-yl)amino]hexyl}-7 $\alpha$ ,12 $\alpha$ -diacetoxy-5 $\beta$ -cholane-3 $\beta$ ,24-diamine (65) and *N,N'*-{4'-[(7-chloroquinoline-4-yl)amino]hexyl}-7 $\alpha$ ,12 $\alpha$ -diacetoxy-5 $\beta$ -cholane-3 $\alpha$ ,24-diamine (66)}**. Compounds were obtained according to procedure described for **62**, using **25** (200 mg, 0.27 mmol), ACQ6 (151 mg, 0.54 mmol) and  $\text{NaBH}_3\text{CN}$  (60 mg, 0.95 mmol). Column chromatography: dry flash,  $\text{SiO}_2$ , eluent EA, gradient EA/MeOH 95/5  $\rightarrow$  2/8, MeOH, gradient EA/MeOH/ $\text{NH}_3$  18/1/1  $\rightarrow$  9/1/1; Lobar RP column, eluent MeOH/ $\text{H}_2\text{O}$  9/1 and MeOH; flash chromatography Biotage SP1RP column, eluent gradient EA/MeOH/ $\text{NH}_3$  8/1/1  $\rightarrow$  9/1/1; preparative TLC  $\text{SiO}_2$ , eluent EA/MeOH/ $\text{NH}_3$ =9/1/1. Yields 7 mg (2.5%) **65** ( $\beta$  epimer) and 6 mg (2.3%) **66** ( $\alpha$  epimer). **65**: Colorless solid,  $[\alpha]_{\text{D}}^{20} = +0.080$  ( $c = 1.8 \times 10^{-3}$  g/mL, MeOH). IR (film): 3313w, 2927m, 2856w, 1724w, 1610w, 1581s, 1539w, 1452w, 1371w, 1332w, 1249m, 1136w, 1080w, 1023w, 901w, 879w, 851w,

807w, 766w, 736w  $\text{cm}^{-1}$ .  $^1\text{H}$  NMR (500 MHz,  $\text{CD}_3\text{OD}$ ,  $\delta$ ): 8.35-8.31 (*m*,  $2\times\text{H-C}(2')$ ), 8.11-8.06 (*m*,  $2\times\text{H-C}(5')$ ), 7.76- (*d*,  $J = 2.2$ ,  $2\times\text{H-C}(8')$ ), 7.37 (*dd*,  $J_1 = 9.0$ ,  $J_2 = 2.1$ ,  $2\times\text{H-C}(6')$ ), 6.50-6.45 (*m*,  $2\times\text{H-C}(3')$ ), 5.07 (*bs*,  $\text{H-C}(12)$ ), 4.86 (*bs*,  $\text{H-C}(7)$ , covered with MeOH), 3.38-3.30 (*m*,  $2\times 2\text{H-C}(9')$ ), 2.79 (*bs*,  $\text{H-C}(3)$ ), 2.60-2.42 (*m*,  $2\times 2\text{H-C}(14')$  and  $2\text{H-C}(24)$ ), 2.08 (*s*,  $\text{CH}_3\text{COO}$ ), 2.03 (*s*,  $\text{CH}_3\text{COO}$ ), 0.92 (*s*,  $\text{CH}_3\text{-C}(10)$ ), 0.83 (*d*,  $J = 6.5$ ,  $\text{CH}_3\text{-C}(20)$ ), 0.74 (*s*,  $\text{CH}_3\text{-C}(13)$ ).  $^{13}\text{C}$  NMR (125 MHz,  $\text{CD}_3\text{OD}$ ,  $\delta$ ): 172.28, 172.22, 152.73, 152.43, 149.74, 136.24, 127.63, 125.90, 124.32, 118.79, 99.60, 77.20, 72.73, 53.75, 51.24, 50.61, 48.03, 46.22, 44.70, 43.94, 38.96, 37.06, 36.27, 35.82, 34.50, 34.05, 33.07, 32.21, 32.15, 31.01, 30.77, 30.49, 30.38, 30.10, 29.82, 29.32, 29.30, 28.31, 28.19, 28.10, 26.83, 26.65, 25.07, 23.84, 23.74, 23.12, 21.45, 21.24, 18.44, 14.45, 12.57. (+)ESI-HRMS ( $m/z$ ):  $[\text{M} + \text{H}]^+$  997.5854 (error +0.62 ppm). Combustion analysis  $\text{C}_{58}\text{H}_{82}\text{Cl}_2\text{N}_6\text{O}_4 \times \text{H}_2\text{O}$ : Calculated C 68.55, H 8.33, N 8.27; found C 68.27, H 8.49, N 8.53. HPLC purity: Method C: RT 11.422, area 97.88 %; method D: RT 5.150, area 99.24.

**66:** Colorless solid,  $[\alpha]_{\text{D}}^{20} = +0.122$  ( $c = 3.9 \times 10^{-3}$  g/mL, MeOH). IR (film): 3303w, 3061w, 2928s, 2856m, 1726m, 1610w, 1580s, 1538w, 1452w, 1372w, 1332w, 1250m, 1136w, 1079w, 1023w, 879w, 851w, 807w, 766w, 737w  $\text{cm}^{-1}$ .  $^1\text{H}$  NMR (500 MHz,  $\text{CD}_3\text{OD}$ ,  $\delta$ ): 8.36-8.31 (*m*,  $2\times\text{H-C}(2')$ ), 8.09 (*d*,  $J = 9.1$ ,  $2\times\text{H-C}(5')$ ), 7.77 (*d*,  $J = 2.0$ ,  $2\times\text{H-C}(8')$ ), 7.38 (*dd*,  $J_1 = 9.0$ ,  $J_2 = 2.1$ ,  $2\times\text{H-C}(6')$ ), 6.51 (*d*,  $J = 5.8$ ,  $2\times\text{H-C}(3')$ ), 5.06 (*bs*,  $\text{H-C}(12)$ ), 4.87 (*bs*,  $\text{H-C}(7)$ ), 3.36 (*t*,  $J = 7.0$ ,  $2\times 2\text{H-C}(9')$ ), 2.60-2.45 (*m*,  $2\times 2\text{H-C}(14')$  and  $2\text{H-C}(24)$ ), 2.36-2.30 (*m*,  $\text{H-C}(3)$ ), 2.06 (*s*,  $\text{CH}_3\text{COO}$ ), 2.04 (*s*,  $\text{CH}_3\text{COO}$ ), 0.94 (*s*,  $\text{CH}_3\text{-C}(10)$ ), 0.83 (*d*,  $J = 6.6$ ,  $\text{CH}_3\text{-C}(20)$ ), 0.76 (*s*,  $\text{CH}_3\text{-C}(13)$ ).  $^{13}\text{C}$  NMR (125 MHz,  $\text{CD}_3\text{OD}$ ,  $\delta$ ): 172.42, 172.30, 152.76, 152.45, 149.76, 136.28, 127.62, 125.91, 124.32, 118.80, 99.61, 77.17, 72.64, 59.35, 51.13, 50.51, 47.76, 46.24, 44.76, 43.92, 43.88, 42.80, 39.02, 37.10, 36.51, 36.26, 35.86, 34.45, 32.46, 30.48, 30.28, 30.20, 30.09, 29.29, 29.24, 28.31, 28.14, 28.06, 26.66, 26.46, 23.83, 23.14, 21.48, 21.23, 18.41, 12.54. (+)ESI-HRMS ( $m/z$ ):  $[\text{M} + 2\text{H}]^{2+}$  499.2938 (error -4.31

ppm)  $[M + H]^+$  997.5824 (error -2.30 ppm). Combustion analysis  $C_{58}H_{82}Cl_2N_6O_4 \times H_2O$ :

Calculated C 68.55, H 8.33, N 8.27; found C 68.60, H 8.30, N 8.35. HPLC purity: Method

C: RT 9.878, area 99.98 %; method D: RT 5.208, area 96.76 %.

**3 $\beta$ -N-{6'-[(7-Chloroquinoline-4-yl)amino]hexyl}-24-N'-{4'-[(7-chloroquinolin-4-yl)amino]butyl}-7 $\alpha$ ,12 $\alpha$ -diacetoxy-5 $\beta$ -cholane-3,24-diamine (67) and**

**3 $\alpha$ -N-{6'-[(7-chloroquinoline-4-yl)amino]hexyl}-24-N'-{4'-[(7-chloroquinoline-4-yl)amino]butyl}-7 $\alpha$ ,12 $\alpha$ -diacetoxy-5 $\beta$ -cholane-3,24-diamine (68).** Compounds were

obtained according to procedure described for **62**, using **24** (200 mg, 0.28 mmol), ACQ6

(157 mg, 0.56 mmol) and NaBH<sub>3</sub>CN (27 mg, 0.42 mmol). Column chromatography: dry

flash, SiO<sub>2</sub>, gradient EtOAc  $\rightarrow$  EtOAc/MeOH = 2:8, MeOH, gradient EtOAc/MeOH/NH<sub>3</sub> =

18:1:1  $\rightarrow$  9:1:1; flash chromatography (Biotage SP1 RP column, gradient MeOH/H<sub>2</sub>O = 9:1

$\rightarrow$  MeOH; preparative TLC, SiO<sub>2</sub>, eluent EtOAc/MeOH/NH<sub>3</sub> = 9:1:1). Yields 14.4 mg (5%)

**67** and 4.2 mg (2%) **68**. Compound **67**: Colorless solid,  $[\alpha]_D^{20} = +0.020$  ( $c = 1.8 \times 10^{-3}$  g/mL,

MeOH). IR (film): 3297m, 2932m, 2861w, 1724m, 1610w, 1581s, 1539w, 1451w, 1371w,

1332w, 1250m, 1167w, 1136w, 1079w, 1023w, 901w, 879w, 851w, 807w, 736w cm<sup>-1</sup>. <sup>1</sup>H

NMR (500 MHz, CD<sub>3</sub>OD,  $\delta$ ): 8.35-8.32 (*m*, H-C(2') and H-C(2'')), 8.10-8.07 (*m*, H-C(8')

and H-C(8'')), 7.78-7.75 (*m*, H-C(5') and H-C(5'')), 7.40-7.35 (*m*, H-C(6') and H-C(6'')),

6.52-6.47 (*m*, H-C(3') and H-C(3'')), 5.06 (*bs*, H-C(12)), 4.85 (*bs*, H-C(7), covered with

MeOH), 3.40-3.32 (*m*, 2H-C(9') and 2H-C(9'')), 2.83 (*bs*, Ha-C(3)), 2.68-2.61 (*m*, 2H-

C(12'')), 2.58-2.46 (*m*, 2H-C(12') and 2H-C(24)), 2.08 (*s*, CH<sub>3</sub>COO), 2.03 (*s*, CH<sub>3</sub>COO),

0.92 (*s*, CH<sub>3</sub>-C(10)), 0.83 (*d*,  $J = 6.6$ , CH<sub>3</sub>-C(20)), 0.73 (*s*, CH<sub>3</sub>-C(13)). <sup>13</sup>C NMR (125 MHz,

CD<sub>3</sub>OD,  $\delta$ ): 170.85, 170.80, 151.32, 151.28, 151.03, 151.00, 148.31, 134.85, 126.23, 126.21,

124.52, 124.49, 122.90, 117.38, 98.24, 98.19, 75.76, 71.28, 52.50, 49.64, 48.82, 46.56, 44.81,

43.28, 42.51, 42.37, 37.54, 35.62, 34.82, 34.39, 33.02, 32.40, 30.76, 29.57, 28.84, 28.42,

27.90, 26.89, 26.83, 26.66, 26.45 25.72, 25.28, 25.23, 23.50, 22.42, 21.67, 20.03, 19.82, 17.00, 11.15. (+)ESI-HRMS ( $m/z$ ): $[M + H]^+$  969.55129 (error -2.22 ppm). Combustion analysis  $C_{56}H_{78}Cl_2N_6O_4 \times 0.5H_2O$ : Calculated C 68.69, H 8.13, N 8.58; found C 68.57, H 8.29, N 8.45. HPLC purity: Method C: RT 8.674, area 95.27 %; method D: RT 5.072, area 99.21 %.

**68**: Colorless solid,  $[\alpha]_D^{20} = +0.013$  ( $c = 8.0 \times 10^{-4}$  g/mL, MeOH). IR (film): 3300m, 2927s, 2856w, 1728m, 1670w, 1610w, 1580s, 1540w, 1452w, 1372w, 1332w, 1246m, 1134w, 1078w, 1024w, 964w, 939w, 880w, 850w, 805w, 732w  $cm^{-1}$ .  $^1H$  NMR (500 MHz,  $CD_3OD$ ,  $\delta$ ): 8.37-8.30 (*m*, H-C(2') and H-C(2'')), 8.12-8.07 (*m*, H-C(8') and H-C(8'')), 7.79-7.75 (*m*, H-C(5') and H-C(5'')), 7.42-7.36 (*m*, H-C(6') and H-C(6'')), 6.54-6.48 (*m*, H-C(3') and H-C(3'')), 5.06 (*bs*, H-C(12)), 4.87 (*bs*, H-C(7)), 3.42-3.34 (*m*, 2H-C(9') and 2H-C(9'')), 2.70-2.63 (*m*, 2H-C(12'')), 2.63-2.48 (*m*, 2H-C(14') and 2H-C(24)), 2.42-2.34 (*m*, H $\beta$ -C(3)), 2.06 (*s*,  $CH_3COO$ ), 2.04 (*s*,  $CH_3COO$ ), 0.94 (*s*,  $CH_3-C(10)$ ), 0.82 (*d*,  $J = 6.4$ ,  $CH_3-C(20)$ ), 0.74 (*s*,  $CH_3-C(13)$ ).  $^{13}C$  NMR (125 MHz,  $CD_3OD$ ,  $\delta$ ): 172.38, 172.28, 152.76, 152.73, 152.46, 152.43, 149.74, 136.29, 127.63, 125.95, 125.92, 124.31, 118.81, 99.66, 99.60, 77.14, 72.60, 59.33, 50.97, 50.15, 49.62, 47.61, 46.25, 44.74, 43.86, 43.75, 42.75, 39.00, 36.80, 36.43, 36.22, 35.83, 34.39, 32.43, 32.14, 30.28, 30.22, 30.09, 29.23, 28.30, 28.11, 28.01, 27.89, 27.72, 27.10, 26.56, 26.47, 23.82, 23.11, 21.48, 21.23, 18.38, 12.54. (+)ESI-HRMS ( $m/z$ ): $[M + 2H]^{2+}$  485.28020 (error -0.32 ppm),  $[M + H]^+$  969.55344 (error 0.65 ppm). Combustion analysis  $C_{56}H_{78}Cl_2N_6O_4 \times 0.5H_2O$ : Calculated C 68.69, H 8.13, N 8.58; found C 68.51, H 8.21, N 8.77. HPLC purity: method C: RT 8.846, area 99.18 %; method D: RT 5.181, area 96.31 %.

**HPLC analyses for purity**

Compounds were analyzed for purity (HPLC) using a Waters 1525 HPLC dual pump system equipped with an Alltech, Select degasser system, and dual  $\lambda$  2487 UV-VIS detector. For data processing, Empower software was used (methods A and B). Methods C and D: Agilent Technologies 1260 Liquid Chromatograph equipped with Quat Pump (G1311B), Injector (G1329B) 1260 ALS, TCC 1260 ( G1316A) and Detector 1260 DAD VL+ (G1315C). For data processing, LC OpenLab CDS ChemStation software was used.

**Method A:** Octadecylsilica was used as the stationary phase (Symmetry C18 analytical column, 4.6 mm  $\times$  150 mm, 5  $\mu$ m, series no. 021336278136 37). Compounds were dissolved in mixture containing 0.2% HCOOH/CH<sub>3</sub>OH 1/1 [% , v/v] final concentrations were 0.1-0.5 mg/mL and injection volume was 10 $\mu$ l. Eluent was made from the following solvents: 0.2% formic acid in water (A) and methanol (B). The analysis were performed at the UV max of the compounds (at 340 nm) to maximize selectivity.

Compounds **12, 52, 16, 22, 23**, were eluted using gradient protocol: 0 - 2 min 98 %A, 2 - 7 min 98 %A  $\rightarrow$  2 %A, 7-9 min 2 %A, 9-16 min 2 %A  $\rightarrow$  98 %A.

Compounds **36, 40, 60, 41, 21, 37, 38, 39, 42, 43, 13, 62, 51, 50, 44, 54, 56, 55, 15, 19, 25, 14, 18, 24** were eluted using gradient protocol: 0-3 min 10 %A, 3-6 min 10 %A  $\rightarrow$  90 %A, 6-9 min 90 %A, 9-12 min 90 %A  $\rightarrow$  10 %A, 12-13 min 10 % A.

Compound **17** was eluted using gradient protocol: 0 - 2 min 95 %A, 2 - 7 min 95 %A  $\rightarrow$  5 %A, 7-9 min 5 %A, 9-16 min 5 %A  $\rightarrow$  95 %A.

Compounds **66, 65**, were eluted using gradient protocol: 0-3 min 20 %A, 3-6 min 20 %A  $\rightarrow$  80 %A, 6-9 min 80 %A, 9-12 min 80 %A  $\rightarrow$  20 %A, 12-13 min 20 % A.

Compounds **61, 57, 20** were eluted using gradient protocol: : 0-3 min 6 %A, 3-6 min 6 %A  $\rightarrow$  94 %A, 6-9 min 94 %A, 9-12 min 94 %A  $\rightarrow$  6 %A, 12-13 min 6 % A.

**Method B:** Octadecylsilica was used as the stationary phase (Nucleosil C18 analytical column, 4 mm  $\times$  150 mm, 5  $\mu$ m). Compounds were dissolved in mixture containing 0.2%



HCOOH/CH<sub>3</sub>OH 1/1 [% , v/v], final concentrations were 0.1-0.5 mg/mL and injection volume was 10µL. Eluent was made from the following solvents: 0.2 % formic acid in water (A) and methanol (B). The analysis were performed at the UV max of the compounds (at 340 nm) to maximize selectivity.

Compounds **12, 40, 52, 16, 22, 20, 21, 13, 17, 50** were eluted using gradient protocol: 0 - 2 min 98 %A, 2 - 7 min 98 %A→ 2 %A, 7-9 min 2 %A, 9-16 min 2 %A→ 98 %A.

Compounds **60, 53, 37, 38, 39, 42, 43, 62, 59, 44, 54, 56, 15, 19, 25, 14, 18, 24** were eluted using gradient protocol: 0-3 min 10 %A, 3-6 min 10 %A→ 90 %A, 6-9 min 90 %A, 9-12 min 90 %A→ 10 %A, 12-13 min 10 % A.

Compounds **51, 55** were eluted using gradient protocol: 0 - 3 min 6 %A, 3 - 6 min 6 %A→ 94 %A, 6-9 min 94 %A, 9-12 min 94 %A→ 6 %A, 12-13 min 6 %A.

Compounds **36, 41, 23, 57**, were eluted using gradient protocol: 0 - 3 min 2 %A, 3 - 6 min 2 %A→ 98 %A, 6-9 min 98 %A, 9-12 min 98 %A→ 2 %A, 12-13 min 2 %A.

Compounds **66, 65**, were eluted using gradient protocol: 0-3 min 20 %A, 3-6 min 20 %A→ 80 %A, 6-9 min 80 %A, 9-12 min 80 %A→ 20 %A, 12-13 min 20 % A.

Compound **61** was eluted using gradient protocol: 0-3 min 4 %A, 3-6 min 4 %A→ 96 %A, 6-9 min 96 %A, 9-12 min 96 %A→ 4 %A, 12-13 min 4 % A.

**Method C:** Zorbax Eclipse Plus C18 4.6 \_ 150mm, 1.8µ, S.N. USWKY01594 was used as the stationary phase. Eluent was made from the following solvents: 0.2% formic acid in water (A) and methanol (B). The analysis were performed at the UV max of the compounds (at 330 nm or 254 nm for compound **63**) to maximize selectivity. Compounds were dissolved in methanol, final concentrations were ~ 1mg/mL. Flow rate was 0.5mL/min.

Compounds were eluted using gradient protocol: 0 - 1 min 95%A, 1 - 6 min 95%A→ 5%A, 6 - 11 min 5%A, 11 – 15 min 5%A→ 95%A, 15 – 20 min 95%A.

Compounds **45** and **57** were eluted using gradient protocol: 0 - 1 min 95%A, 1 - 6 min 95%A→ 0%A, 6 - 11 min 0%A, 11 – 15 min 0%A→ 95%A, 15 – 20 min 95%A.

**Method D:** Poroshell 120 EC-C18, 4.6 \_ 50mm, 2.7 $\mu$ , S.N. USCFU07797 was used as the stationary phase. Eluent was made from the following solvents: 0.2% formic acid in water (A) and methanol (B). The analysis were performed at the UV max of the compounds (at 330 nm or 254 nm for compound **66**) to maximize selectivity. Compounds were dissolved in methanol, final concentrations were ~ 1mg/mL. Flow rate was 0.5mL/min. Compounds were eluted using gradient protocol: 0 - 1 min 95%A, 1 - 3 min 95%A $\rightarrow$  0%A, 3 - 10 min 0%A, 10 - 12 min 0%A $\rightarrow$  95%A, 12 - 15 min 95%A.

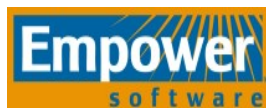

Reported by User: System

Project Name: Organskajedinjenja

### SAMPLE INFORMATION

|                                 |                                   |
|---------------------------------|-----------------------------------|
| Sample Name: DO152Á Compound 12 | Acquired By: System               |
| Sample Type: Unknown            | Date Acquired: 4.6.2012 14:09:40  |
| Vial: 5                         | Acq. Method Set: 98225434005_MS   |
| Injection #: 1                  | Date Processed: 4.6.2012 15:28:18 |
| Injection Volume: 10,00 ul      | Processing Method: do152 11       |
| Run Time: 16,0 Minutes          | Channel Name: 2487Channel 2       |
| Sample Set Name:                | Proc. Chnl. Descr.:               |

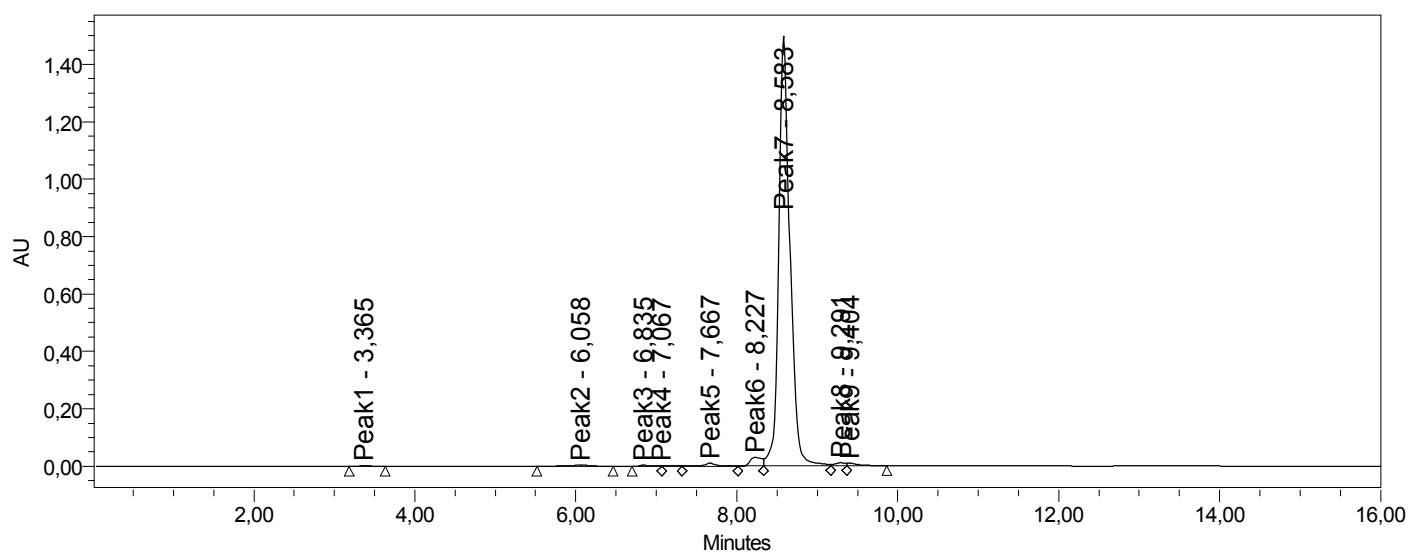

|   | Peak Name | RT    | Area     | % Area | Height  |
|---|-----------|-------|----------|--------|---------|
| 1 | Peak1     | 3,365 | 17300    | 0,11   | 1699    |
| 2 | Peak2     | 6,058 | 86364    | 0,56   | 4728    |
| 3 | Peak3     | 6,835 | 45929    | 0,30   | 3843    |
| 4 | Peak4     | 7,067 | 16655    | 0,11   | 1982    |
| 5 | Peak5     | 7,667 | 116557   | 0,75   | 10064   |
| 6 | Peak6     | 8,227 | 305824   | 1,98   | 29779   |
| 7 | Peak7     | 8,583 | 14675122 | 95,04  | 1489514 |
| 8 | Peak8     | 9,291 | 94072    | 0,61   | 9950    |
| 9 | Peak9     | 9,404 | 83317    | 0,54   | 8496    |



Method A

## Multi Sample Summary

Reported by User: System

Project Name: Organskajedinjenja

## SAMPLE INFORMATION

|                   |              |             |                     |                    |
|-------------------|--------------|-------------|---------------------|--------------------|
| Sample Name:      | DR06         | Compound 13 | Acquired By:        | System             |
| Sample Type:      | Unknown      |             | Date Acquired:      | 18.7.2012 11:17:59 |
| Vial:             | 1            |             | Acq. Method Set:    | 10902543400513m_MS |
| Injection #:      | 1            |             | Date Processed:     | 18.7.2012 11:40:54 |
| Injection Volume: | 10,00 ul     |             | Processing Method:  | DR06               |
| Run Time:         | 13,0 Minutes |             | Channel Name:       | 2487Channel 2      |
| Sample Set Name:  |              |             | Proc. Chnl. Descr.: |                    |

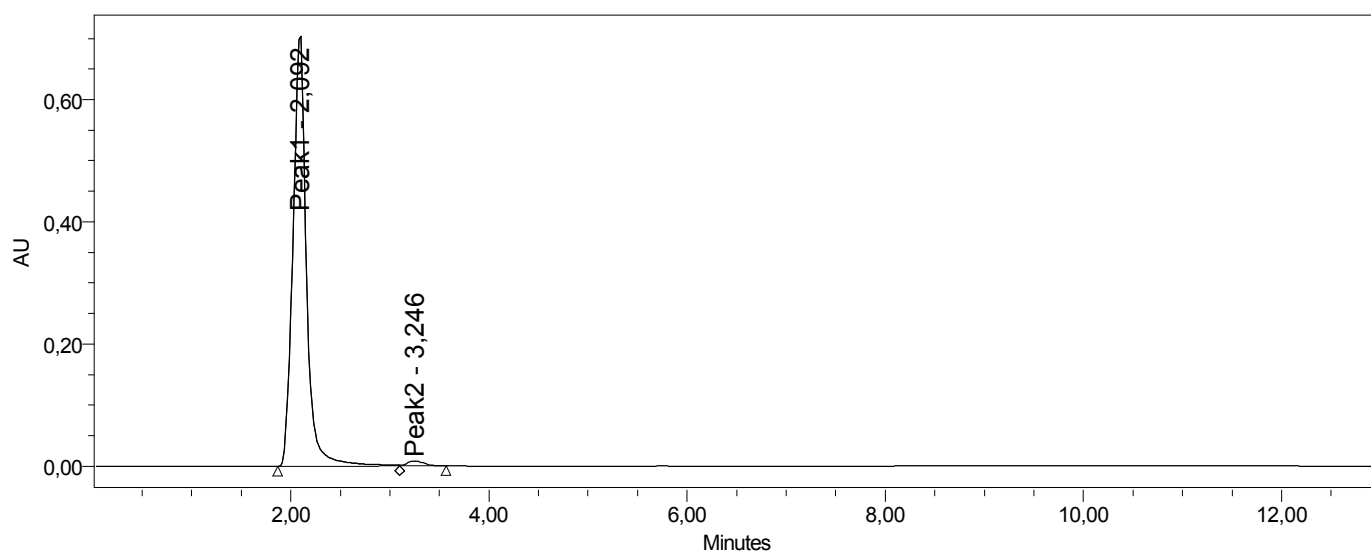

|   | Peak Name | RT    | Area    | % Area | Height |
|---|-----------|-------|---------|--------|--------|
| 1 | Peak1     | 2,092 | 6660900 | 98,69  | 706478 |
| 2 | Peak2     | 3,246 | 88276   | 1,31   | 7570   |

Reported by User: System

Project Name: Organskajedinjenja

SAMPLE INFORMATION

|                   |                    |                     |                    |
|-------------------|--------------------|---------------------|--------------------|
| Sample Name:      | DOZS11 Compound 14 | Acquired By:        | System             |
| Sample Type:      | Unknown            | Date Acquired:      | 19.7.2012 11:37:31 |
| Vial:             | 4                  | Acq. Method Set:    | 10902543400513m_MS |
| Injection #:      | 1                  | Date Processed:     | 19.7.2012 11:52:21 |
| Injection Volume: | 10,00 ul           | Processing Method:  | DOZS11             |
| Run Time:         | 13,0 Minutes       | Channel Name:       | 2487Channel 2      |
| Sample Set Name:  |                    | Proc. Chnl. Descr.: |                    |

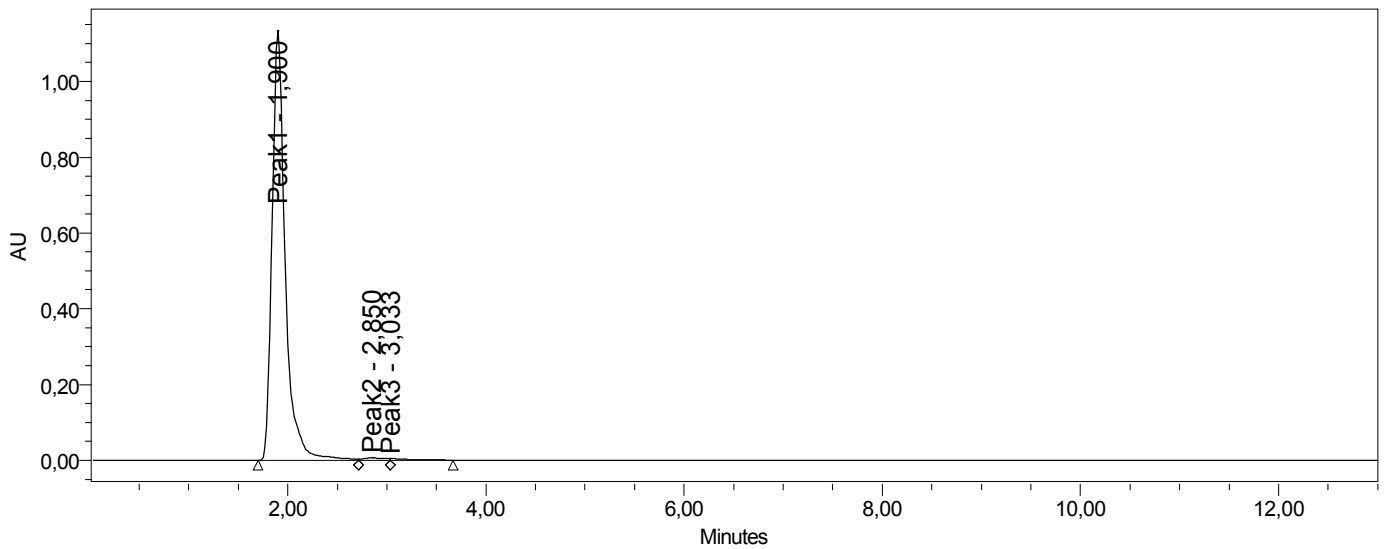

|   | Peak Name | RT    | Area     | % Area | Height  |
|---|-----------|-------|----------|--------|---------|
| 1 | Peak1     | 1,900 | 10480061 | 98,59  | 1131248 |
| 2 | Peak2     | 2,850 | 94128    | 0,89   | 6179    |
| 3 | Peak3     | 3,033 | 55912    | 0,53   | 4825    |

Reported by User: System

Project Name: Organskajedinjenja

SAMPLE INFORMATION

|                   |                    |                     |                    |
|-------------------|--------------------|---------------------|--------------------|
| Sample Name:      | DOJK06 Compound 15 | Acquired By:        | System             |
| Sample Type:      | Unknown            | Date Acquired:      | 19.7.2012 10:55:50 |
| Vial:             | 1                  | Acq. Method Set:    | 10902543400513m_MS |
| Injection #:      | 1                  | Date Processed:     | 19.7.2012 11:12:06 |
| Injection Volume: | 10,00 ul           | Processing Method:  | DOJK06             |
| Run Time:         | 13,0 Minutes       | Channel Name:       | 2487Channel 2      |
| Sample Set Name:  |                    | Proc. Chnl. Descr.: |                    |

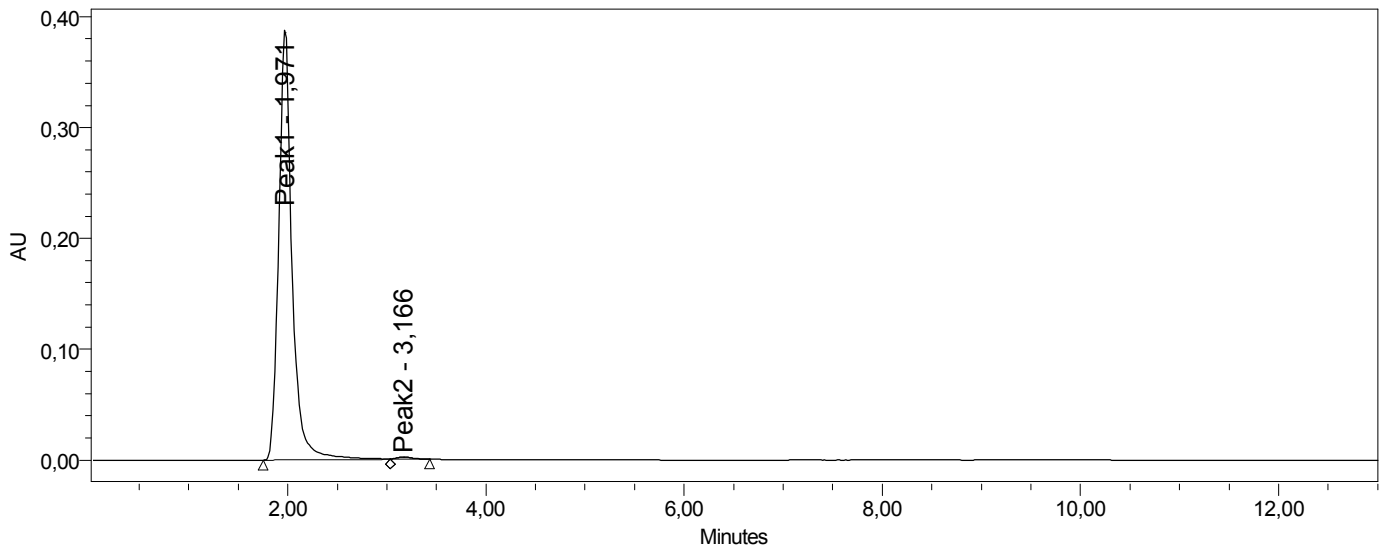

|   | Peak Name | RT    | Area    | % Area | Height |
|---|-----------|-------|---------|--------|--------|
| 1 | Peak1     | 1,971 | 3633586 | 99,39  | 387128 |
| 2 | Peak2     | 3,166 | 22169   | 0,61   | 2037   |

SAMPLE INFORMATION

|                   |                   |                     |                   |
|-------------------|-------------------|---------------------|-------------------|
| Sample Name:      | DO183 Compound 16 | Acquired By:        | System            |
| Sample Type:      | Unknown           | Date Acquired:      | 5.6.2012 11:07:08 |
| Vial:             | 2                 | Acq. Method Set:    | 98225434005_MS    |
| Injection #:      | 1                 | Date Processed:     | 5.6.2012 11:28:53 |
| Injection Volume: | 10,00 ul          | Processing Method:  | DO183 2           |
| Run Time:         | 17,0 Minutes      | Channel Name:       | 2487Channel 2     |
| Sample Set Name:  |                   | Proc. Chnl. Descr.: |                   |

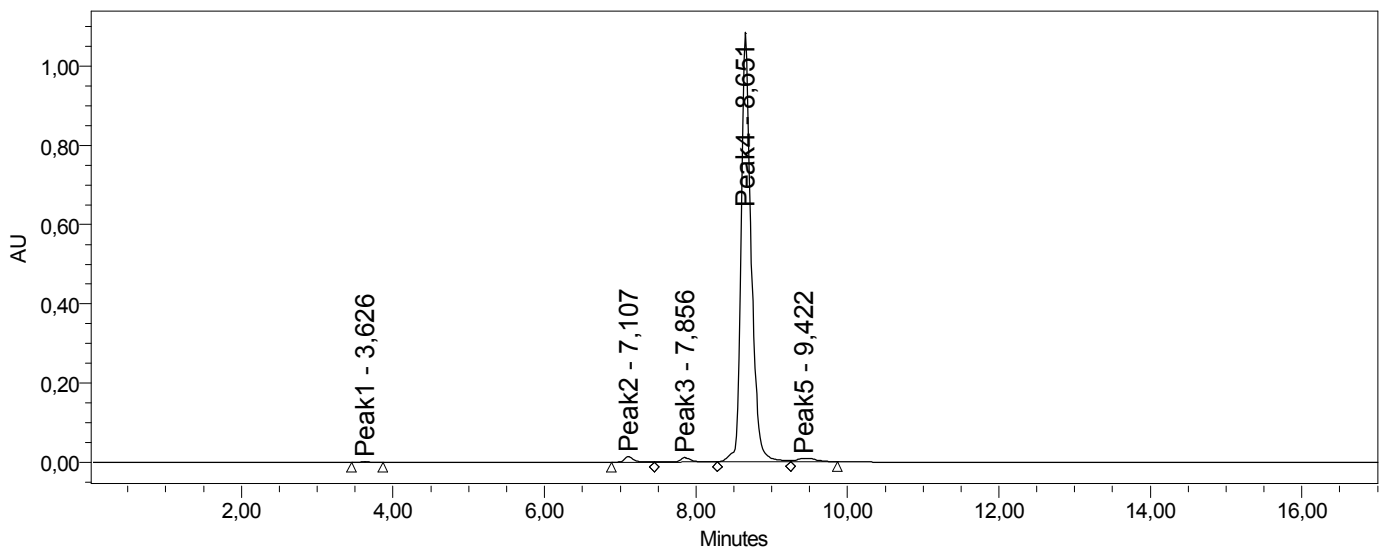

|   | Peak Name | RT    | Area     | % Area | Height  |
|---|-----------|-------|----------|--------|---------|
| 1 | Peak1     | 3,626 | 9572     | 0,09   | 931     |
| 2 | Peak2     | 7,107 | 112946   | 1,08   | 14450   |
| 3 | Peak3     | 7,856 | 120199   | 1,15   | 11172   |
| 4 | Peak4     | 8,651 | 10042346 | 96,19  | 1075678 |
| 5 | Peak5     | 9,422 | 155045   | 1,49   | 8483    |

SAMPLE INFORMATION

|                   |                    |                     |                    |
|-------------------|--------------------|---------------------|--------------------|
| Sample Name:      | DOZS12 Compound 18 | Acquired By:        | System             |
| Sample Type:      | Unknown            | Date Acquired:      | 19.7.2012 11:51:18 |
| Vial:             | 5                  | Acq. Method Set:    | 10902543400513m_MS |
| Injection #:      | 1                  | Date Processed:     | 19.7.2012 12:21:59 |
| Injection Volume: | 10,00 ul           | Processing Method:  | DOZS12             |
| Run Time:         | 13,0 Minutes       | Channel Name:       | 2487Channel 2      |
| Sample Set Name:  |                    | Proc. Chnl. Descr.: |                    |

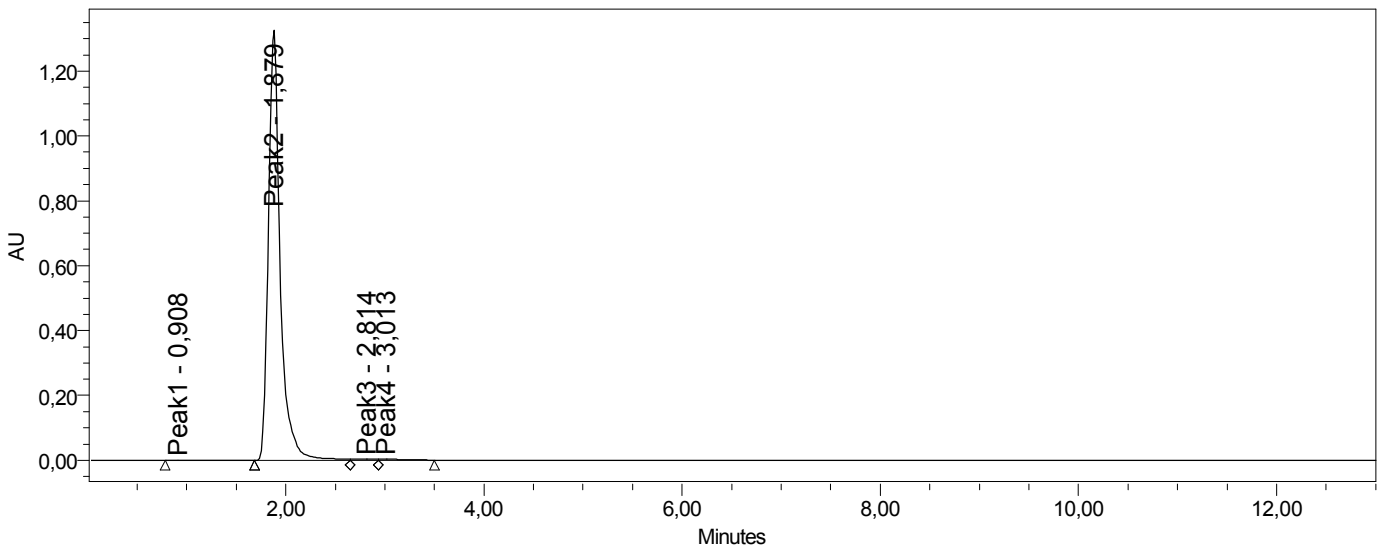

|   | Peak Name | RT    | Area     | % Area | Height  |
|---|-----------|-------|----------|--------|---------|
| 1 | Peak1     | 0,908 | 6572     | 0,06   | 272     |
| 2 | Peak2     | 1,879 | 10985407 | 99,04  | 1324027 |
| 3 | Peak3     | 2,814 | 49573    | 0,45   | 3150    |
| 4 | Peak4     | 3,013 | 50386    | 0,45   | 3601    |



Reported by User: System

Project Name: Organskajedinjenja

SAMPLE INFORMATION

|                   |              |             |                     |                    |
|-------------------|--------------|-------------|---------------------|--------------------|
| Sample Name:      | DOJK07       | Compound 19 | Acquired By:        | System             |
| Sample Type:      | Unknown      |             | Date Acquired:      | 19.7.2012 11:23:36 |
| Vial:             | 3            |             | Acq. Method Set:    | 10902543400513m_MS |
| Injection #:      | 1            |             | Date Processed:     | 19.7.2012 11:38:53 |
| Injection Volume: | 10,00 ul     |             | Processing Method:  | DOJK07             |
| Run Time:         | 13,0 Minutes |             | Channel Name:       | 2487Channel 2      |
| Sample Set Name:  |              |             | Proc. Chnl. Descr.: |                    |

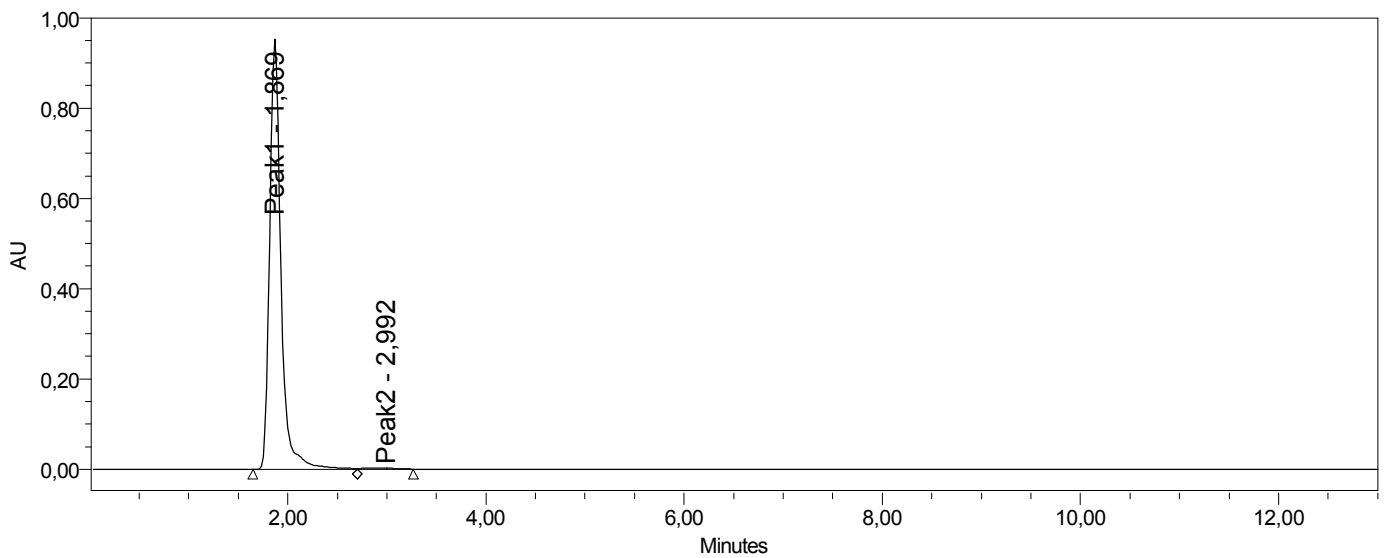

|   | Peak Name | RT    | Area    | % Area | Height |
|---|-----------|-------|---------|--------|--------|
| 1 | Peak1     | 1,869 | 7549586 | 99,39  | 948295 |
| 2 | Peak2     | 2,992 | 45965   | 0,61   | 2058   |

Reported by User: System

Project Name: Organskajedinjenja

SAMPLE INFORMATION

|                   |              |             |                     |                    |
|-------------------|--------------|-------------|---------------------|--------------------|
| Sample Name:      | DO193        | Compound 21 | Acquired By:        | System             |
| Sample Type:      | Unknown      |             | Date Acquired:      | 18.7.2012 14:26:02 |
| Vial:             | 13           |             | Acq. Method Set:    | 10902543400513m_MS |
| Injection #:      | 1            |             | Date Processed:     | 18.7.2012 14:41:14 |
| Injection Volume: | 10,00 ul     |             | Processing Method:  | DO193              |
| Run Time:         | 13,0 Minutes |             | Channel Name:       | 2487Channel 2      |
| Sample Set Name:  |              |             | Proc. Chnl. Descr.: |                    |

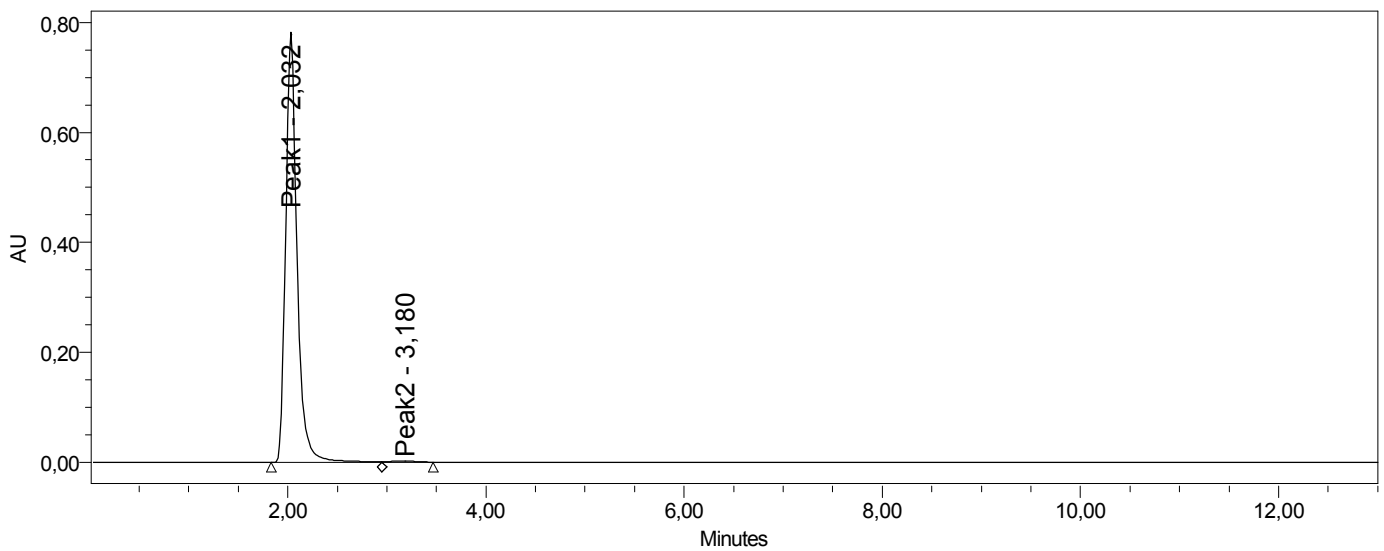

|   | Peak Name | RT    | Area    | % Area | Height |
|---|-----------|-------|---------|--------|--------|
| 1 | Peak1     | 2,032 | 6247539 | 99,46  | 777700 |
| 2 | Peak2     | 3,180 | 34076   | 0,54   | 2146   |

SAMPLE INFORMATION

|                   |              |             |                     |                   |
|-------------------|--------------|-------------|---------------------|-------------------|
| Sample Name:      | DO184        | Compound 22 | Acquired By:        | System            |
| Sample Type:      | Unknown      |             | Date Acquired:      | 5.6.2012 12:14:01 |
| Vial:             | 5            |             | Acq. Method Set:    | 98225434005_MS    |
| Injection #:      | 1            |             | Date Processed:     | 5.6.2012 13:27:27 |
| Injection Volume: | 10,00 ul     |             | Processing Method:  | proba4rtr         |
| Run Time:         | 16,0 Minutes |             | Channel Name:       | 2487Channel 2     |
| Sample Set Name:  |              |             | Proc. Chnl. Descr.: |                   |

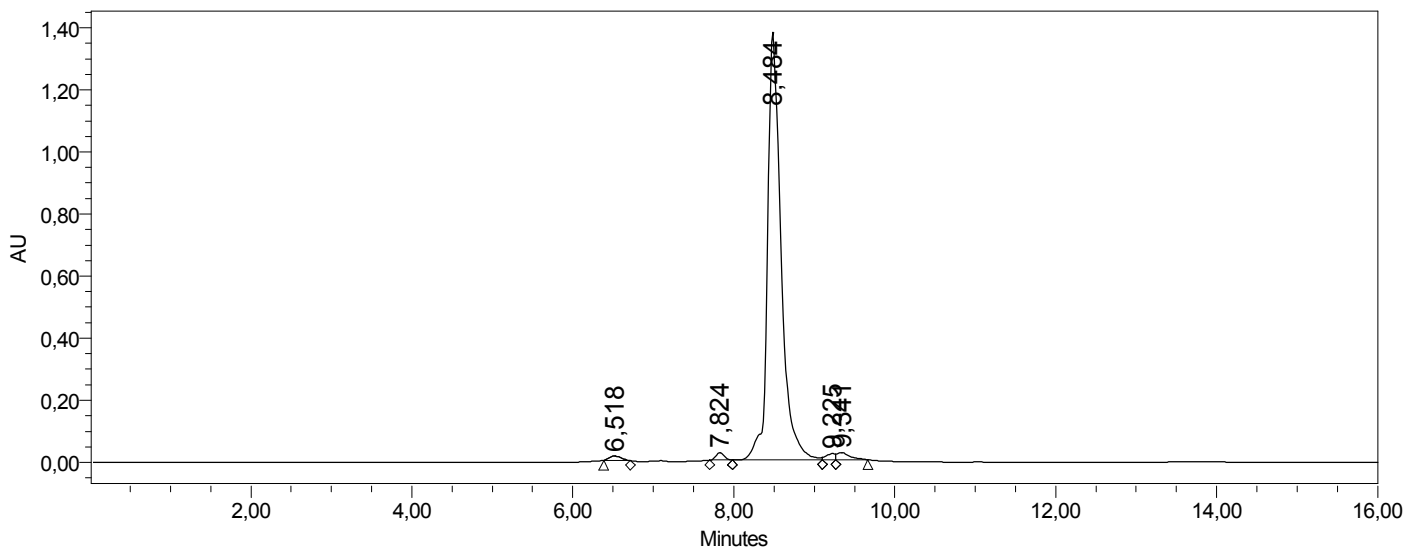

|   | RT    | Area     | % Area | Height  |
|---|-------|----------|--------|---------|
| 1 | 6,518 | 136102   | 0,81   | 13769   |
| 2 | 7,824 | 168970   | 1,00   | 24317   |
| 3 | 8,484 | 16157420 | 95,76  | 1371249 |
| 4 | 9,225 | 156009   | 0,92   | 19973   |
| 5 | 9,341 | 254034   | 1,51   | 22655   |

Reported by User: System

Project Name: Organskajedinjenja

SAMPLE INFORMATION

|                   |                    |                     |                    |
|-------------------|--------------------|---------------------|--------------------|
| Sample Name:      | DOZS13 Compound 24 | Acquired By:        | System             |
| Sample Type:      | Unknown            | Date Acquired:      | 19.7.2012 12:05:11 |
| Vial:             | 6                  | Acq. Method Set:    | 10902543400513m_MS |
| Injection #:      | 1                  | Date Processed:     | 19.7.2012 12:23:11 |
| Injection Volume: | 10,00 ul           | Processing Method:  | DOZS13             |
| Run Time:         | 13,0 Minutes       | Channel Name:       | 2487Channel 2      |
| Sample Set Name:  |                    | Proc. Chnl. Descr.: |                    |

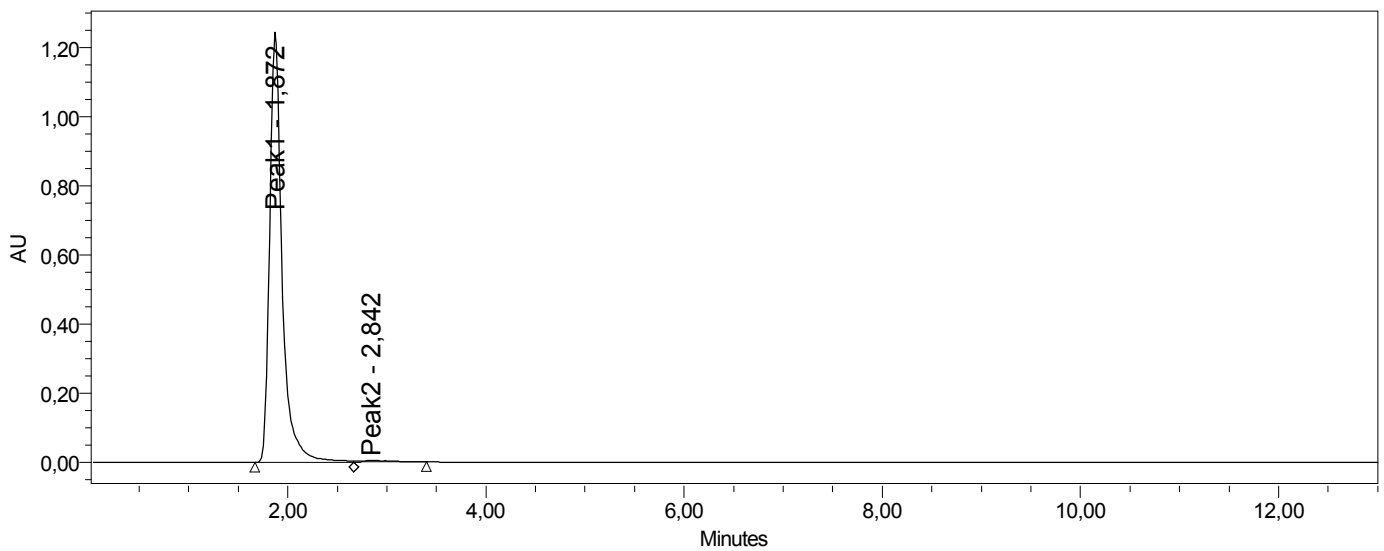

|   | Peak Name | RT    | Area     | % Area | Height  |
|---|-----------|-------|----------|--------|---------|
| 1 | Peak1     | 1,872 | 10842029 | 99,17  | 1243086 |
| 2 | Peak2     | 2,842 | 90494    | 0,83   | 3733    |

Reported by User: System

Project Name: Organskajedinjenja

SAMPLE INFORMATION

|                   |              |             |                     |                    |
|-------------------|--------------|-------------|---------------------|--------------------|
| Sample Name:      | DOJK08       | Compound 25 | Acquired By:        | System             |
| Sample Type:      | Unknown      |             | Date Acquired:      | 19.7.2012 11:09:47 |
| Vial:             | 2            |             | Acq. Method Set:    | 10902543400513m_MS |
| Injection #:      | 1            |             | Date Processed:     | 19.7.2012 11:24:59 |
| Injection Volume: | 10,00 ul     |             | Processing Method:  | DOJK08             |
| Run Time:         | 13,0 Minutes |             | Channel Name:       | 2487Channel 2      |
| Sample Set Name:  |              |             | Proc. Chnl. Descr.: |                    |

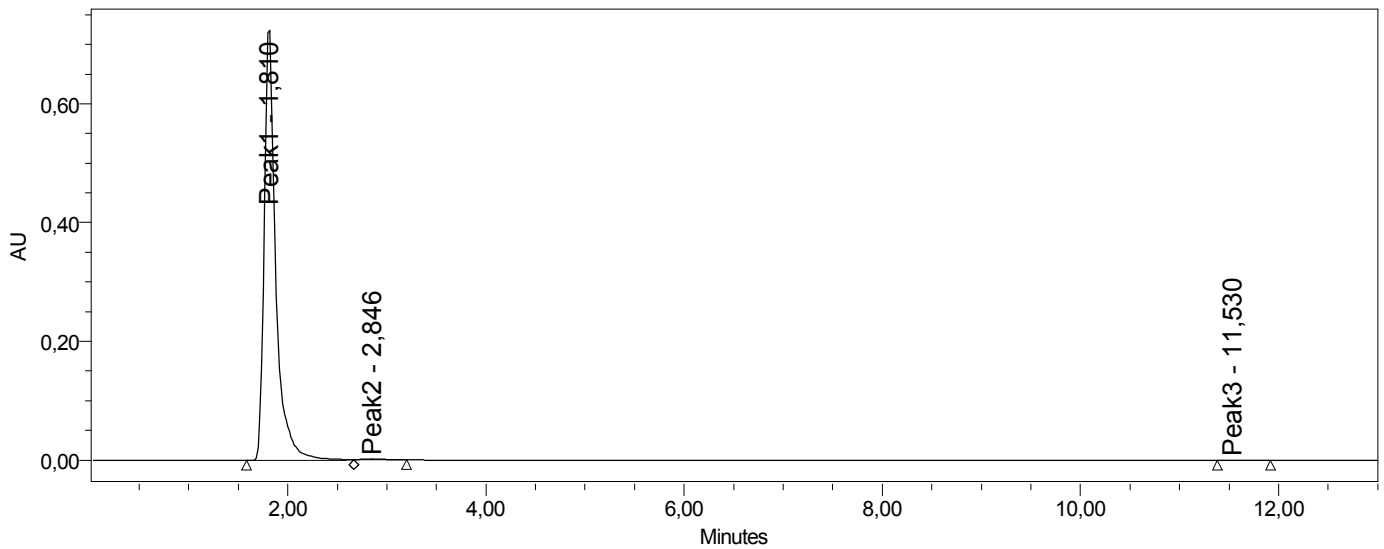

|   | Peak Name | RT     | Area    | % Area | Height |
|---|-----------|--------|---------|--------|--------|
| 1 | Peak1     | 1,810  | 5905692 | 99,47  | 725594 |
| 2 | Peak2     | 2,846  | 27517   | 0,46   | 1637   |
| 3 | Peak3     | 11,530 | 3833    | 0,06   | 407    |

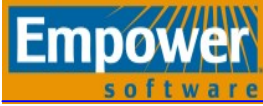

Reported by User: System

Project Name: Organskajedinjenja

SAMPLE INFORMATION

|                   |                   |                     |                    |
|-------------------|-------------------|---------------------|--------------------|
| Sample Name:      | DO174 Compound 36 | Acquired By:        | System             |
| Sample Type:      | Unknown           | Date Acquired:      | 18.7.2012 11:45:33 |
| Vial:             | 2                 | Acq. Method Set:    | 10902543400513m_MS |
| Injection #:      | 1                 | Date Processed:     | 18.7.2012 12:00:12 |
| Injection Volume: | 10,00 ul          | Processing Method:  | DO174              |
| Run Time:         | 13,0 Minutes      | Channel Name:       | 2487Channel 2      |
| Sample Set Name:  |                   | Proc. Chnl. Descr.: |                    |

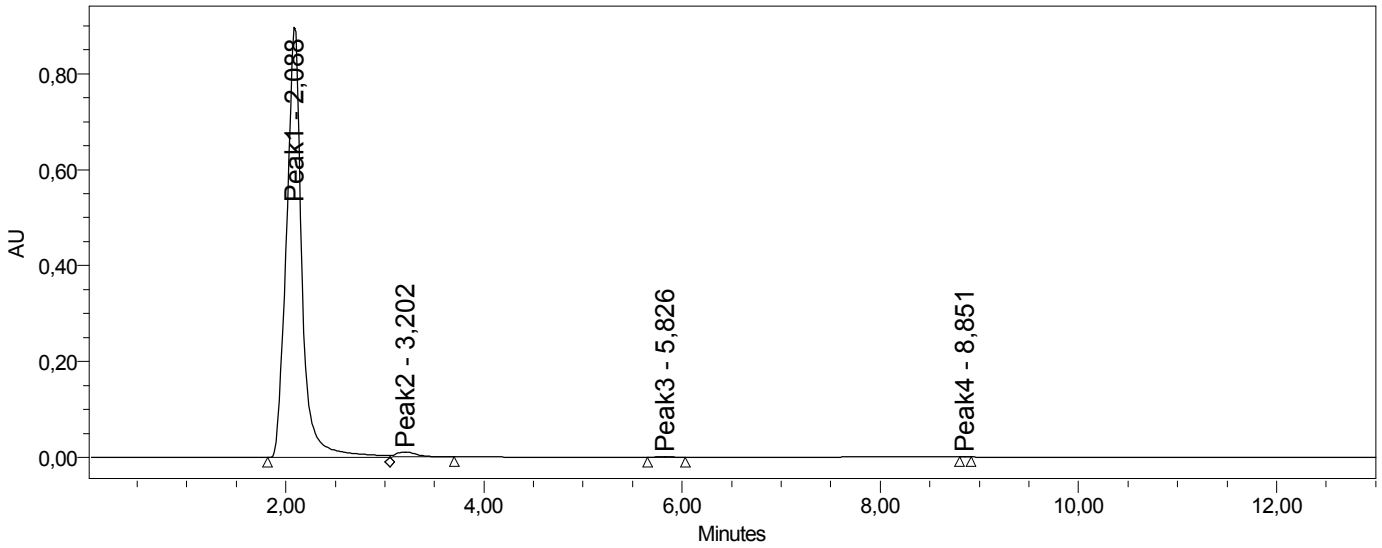

|   | Peak Name | RT    | Area    | % Area | Height |
|---|-----------|-------|---------|--------|--------|
| 1 | Peak1     | 2,088 | 9692935 | 98,43  | 896550 |
| 2 | Peak2     | 3,202 | 148240  | 1,51   | 10323  |
| 3 | Peak3     | 5,826 | 5674    | 0,06   | 501    |
| 4 | Peak4     | 8,851 | 928     | 0,01   | 331    |

Reported by User: System

Project Name: Organskajedinjenja

SAMPLE INFORMATION

|                   |              |             |                     |                    |
|-------------------|--------------|-------------|---------------------|--------------------|
| Sample Name:      | DO194        | Compound 37 | Acquired By:        | System             |
| Sample Type:      | Unknown      |             | Date Acquired:      | 18.7.2012 12:17:23 |
| Vial:             | 4            |             | Acq. Method Set:    | 10902543400513m_MS |
| Injection #:      | 1            |             | Date Processed:     | 18.7.2012 12:32:47 |
| Injection Volume: | 10,00 ul     |             | Processing Method:  | DO194              |
| Run Time:         | 13,0 Minutes |             | Channel Name:       | 2487Channel 2      |
| Sample Set Name:  |              |             | Proc. Chnl. Descr.: |                    |

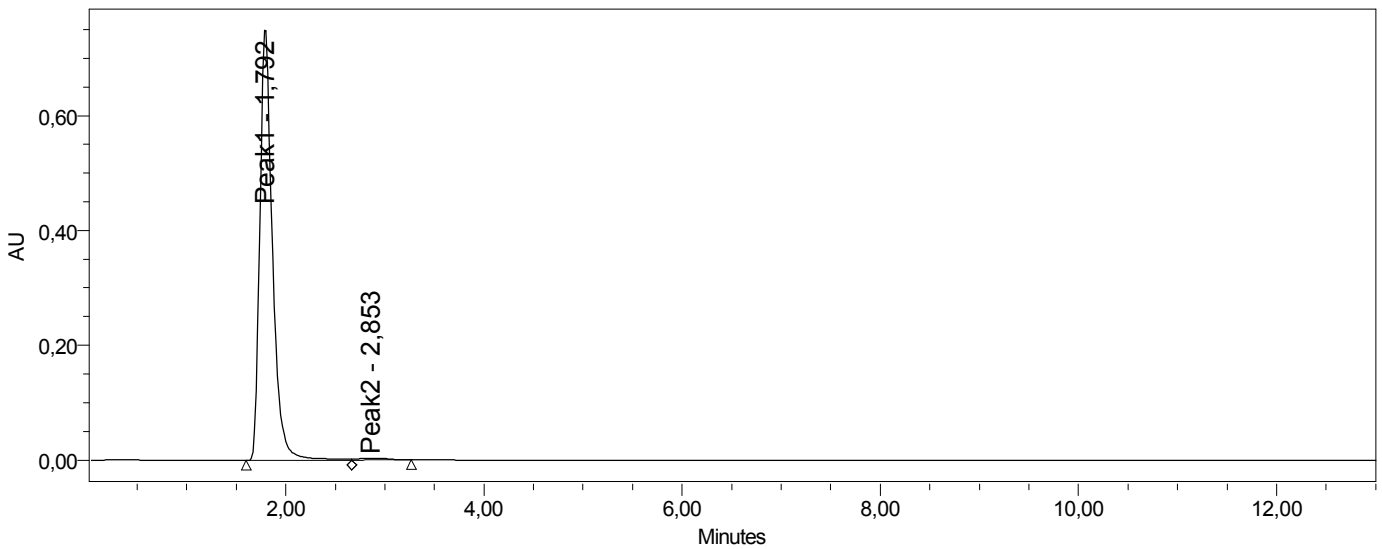

|   | Peak Name | RT    | Area    | % Area | Height |
|---|-----------|-------|---------|--------|--------|
| 1 | Peak1     | 1,792 | 6673440 | 99,09  | 755512 |
| 2 | Peak2     | 2,853 | 61429   | 0,91   | 3057   |

Reported by User: System

Project Name: Organskajedinjenja

SAMPLE INFORMATION

|                   |              |             |                     |                    |
|-------------------|--------------|-------------|---------------------|--------------------|
| Sample Name:      | DO195        | Compound 38 | Acquired By:        | System             |
| Sample Type:      | Unknown      |             | Date Acquired:      | 18.7.2012 12:45:01 |
| Vial:             | 6            |             | Acq. Method Set:    | 10902543400513m_MS |
| Injection #:      | 1            |             | Date Processed:     | 18.7.2012 13:00:17 |
| Injection Volume: | 10,00 ul     |             | Processing Method:  | DO195              |
| Run Time:         | 13,0 Minutes |             | Channel Name:       | 2487Channel 2      |
| Sample Set Name:  |              |             | Proc. Chnl. Descr.: |                    |

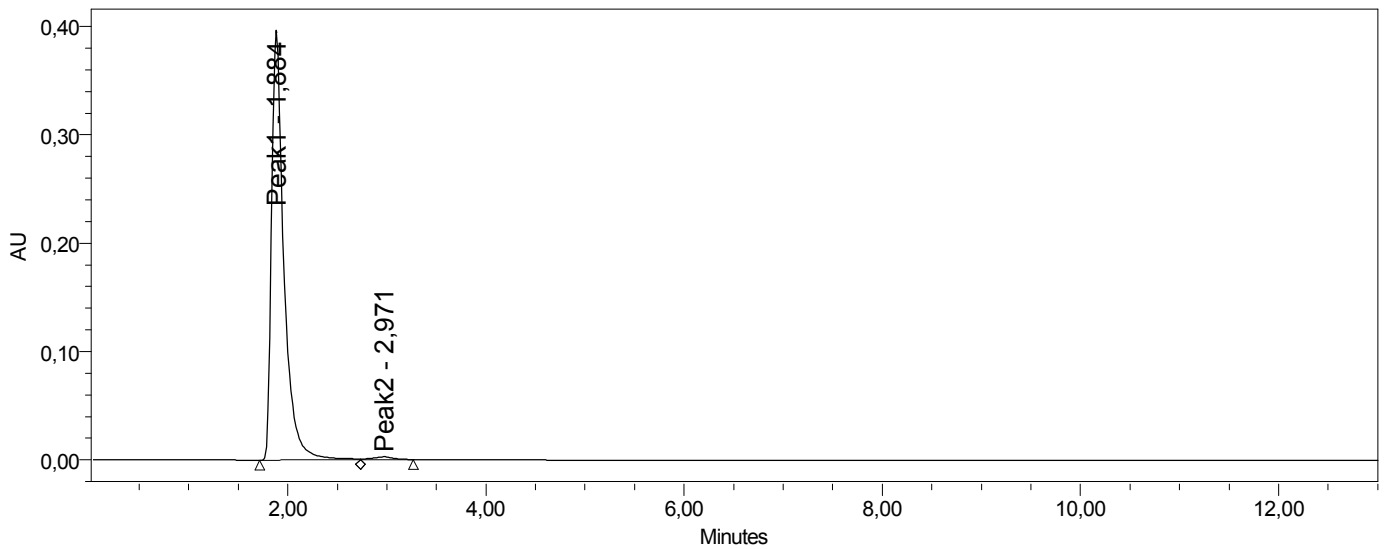

|   | Peak Name | RT    | Area    | % Area | Height |
|---|-----------|-------|---------|--------|--------|
| 1 | Peak1     | 1,884 | 3446210 | 98,92  | 395282 |
| 2 | Peak2     | 2,971 | 37663   | 1,08   | 2613   |



Reported by User: System

Project Name: Organskajedinjenja

SAMPLE INFORMATION

|                   |              |             |                     |                    |
|-------------------|--------------|-------------|---------------------|--------------------|
| Sample Name:      | DO196        | Compound 39 | Acquired By:        | System             |
| Sample Type:      | Unknown      |             | Date Acquired:      | 18.7.2012 13:13:54 |
| Vial:             | 8            |             | Acq. Method Set:    | 10902543400513m_MS |
| Injection #:      | 1            |             | Date Processed:     | 18.7.2012 13:29:01 |
| Injection Volume: | 10,00 ul     |             | Processing Method:  | DO196              |
| Run Time:         | 13,0 Minutes |             | Channel Name:       | 2487Channel 2      |
| Sample Set Name:  |              |             | Proc. Chnl. Descr.: |                    |

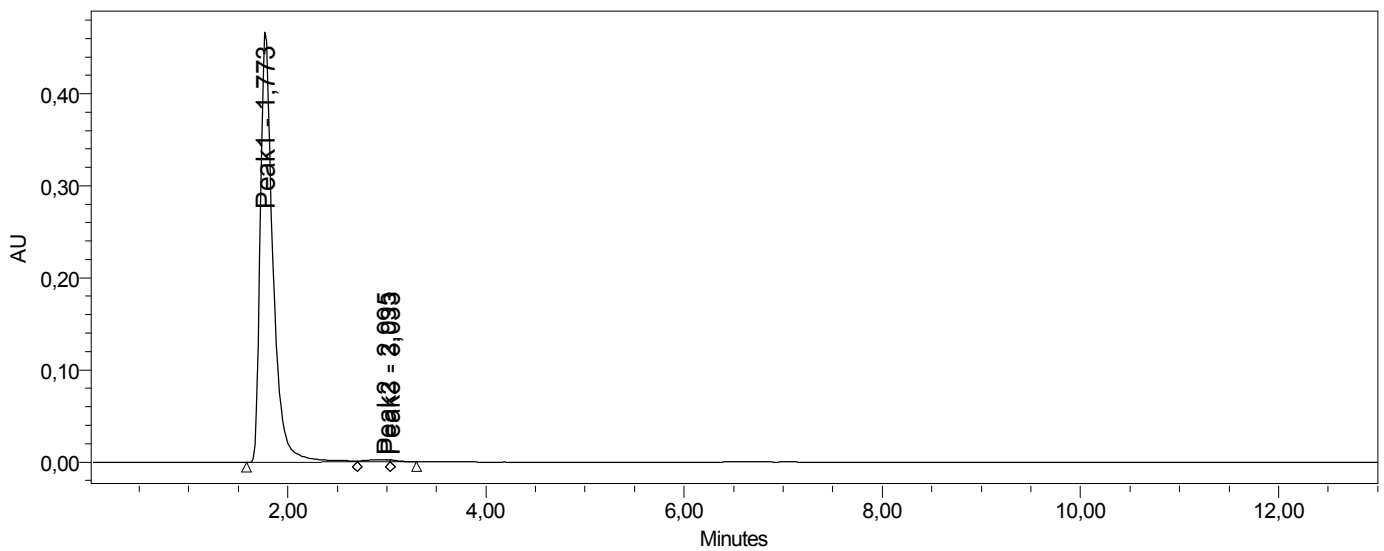

|   | Peak Name | RT    | Area    | % Area | Height |
|---|-----------|-------|---------|--------|--------|
| 1 | Peak1     | 1,773 | 4160601 | 98,86  | 468149 |
| 2 | Peak2     | 2,995 | 37246   | 0,88   | 2336   |
| 3 | Peak3     | 3,033 | 10807   | 0,26   | 2117   |

Reported by User: System

Project Name: Organskajedinjenja

## SAMPLE INFORMATION

|                   |                   |                     |                    |
|-------------------|-------------------|---------------------|--------------------|
| Sample Name:      | DO179 Compound 40 | Acquired By:        | System             |
| Sample Type:      | Unknown           | Date Acquired:      | 18.7.2012 12:02:53 |
| Vial:             | 3                 | Acq. Method Set:    | 10902543400513m_MS |
| Injection #:      | 1                 | Date Processed:     | 18.7.2012 12:18:41 |
| Injection Volume: | 10,00 ul          | Processing Method:  | DO179              |
| Run Time:         | 13,0 Minutes      | Channel Name:       | 2487Channel 2      |
| Sample Set Name:  |                   | Proc. Chnl. Descr.: |                    |

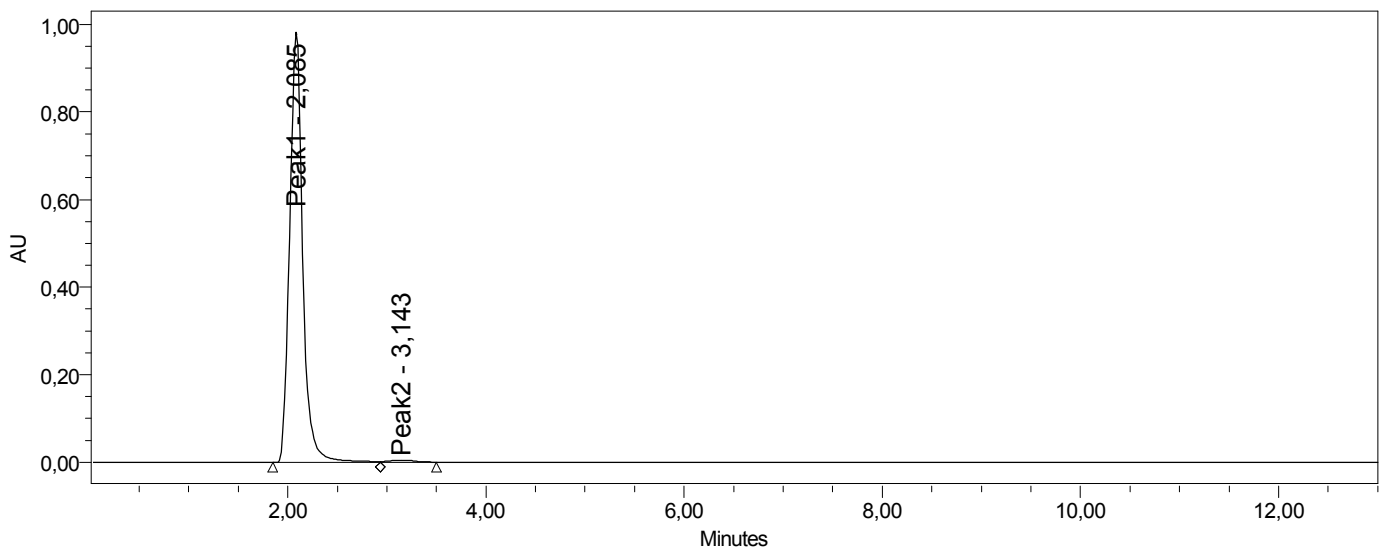

|   | Peak Name | RT    | Area    | % Area | Height |
|---|-----------|-------|---------|--------|--------|
| 1 | Peak1     | 2,085 | 8971779 | 99,22  | 978169 |
| 2 | Peak2     | 3,143 | 70514   | 0,78   | 3959   |

Reported by User: System

Project Name: Organskajedinjenja

SAMPLE INFORMATION

|                   |              |             |                     |                    |
|-------------------|--------------|-------------|---------------------|--------------------|
| Sample Name:      | DO191        | Compound 41 | Acquired By:        | System             |
| Sample Type:      | Unknown      |             | Date Acquired:      | 18.7.2012 12:31:11 |
| Vial:             | 5            |             | Acq. Method Set:    | 10902543400513m_MS |
| Injection #:      | 1            |             | Date Processed:     | 18.7.2012 12:46:25 |
| Injection Volume: | 10,00 ul     |             | Processing Method:  | DO191              |
| Run Time:         | 13,0 Minutes |             | Channel Name:       | 2487Channel 2      |
| Sample Set Name:  |              |             | Proc. Chnl. Descr.: |                    |

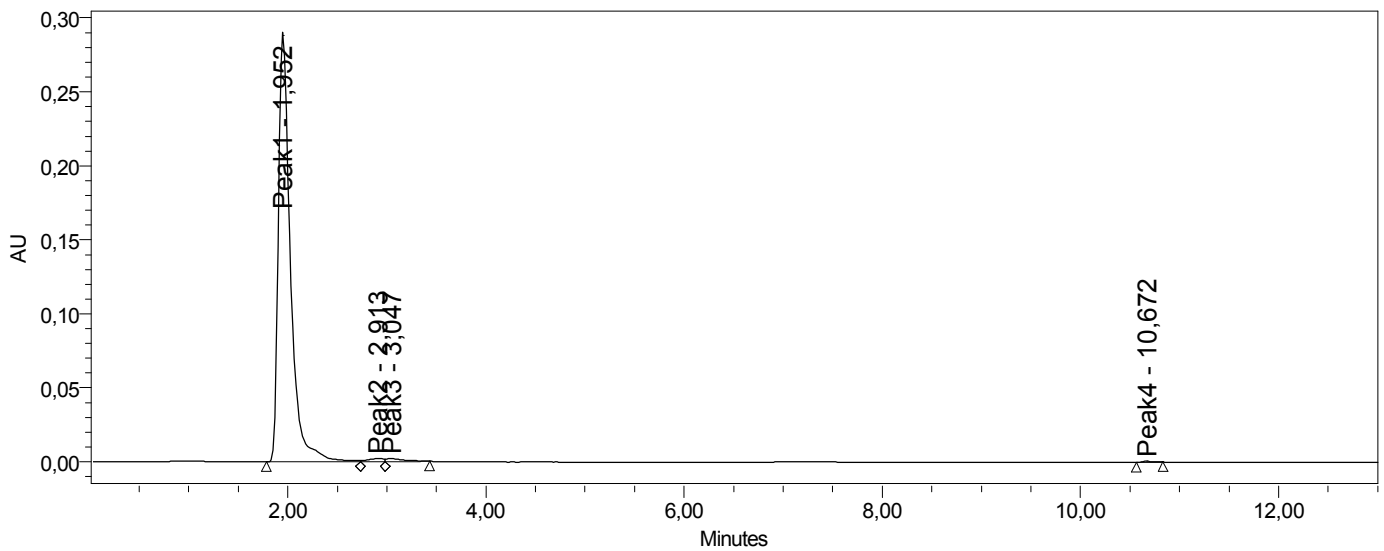

|   | Peak Name | RT     | Area    | % Area | Height |
|---|-----------|--------|---------|--------|--------|
| 1 | Peak1     | 1,952  | 2469475 | 98,07  | 289267 |
| 2 | Peak2     | 2,913  | 21184   | 0,84   | 1876   |
| 3 | Peak3     | 3,047  | 23458   | 0,93   | 1833   |
| 4 | Peak4     | 10,672 | 4055    | 0,16   | 620    |

Reported by User: System

Project Name: Organskajedinjenja

SAMPLE INFORMATION

|                   |              |             |                     |                    |
|-------------------|--------------|-------------|---------------------|--------------------|
| Sample Name:      | DO197        | Compound 42 | Acquired By:        | System             |
| Sample Type:      | Unknown      |             | Date Acquired:      | 18.7.2012 12:58:57 |
| Vial:             | 7            |             | Acq. Method Set:    | 10902543400513m_MS |
| Injection #:      | 1            |             | Date Processed:     | 18.7.2012 13:14:53 |
| Injection Volume: | 10,00 ul     |             | Processing Method:  | DO197              |
| Run Time:         | 13,0 Minutes |             | Channel Name:       | 2487Channel 2      |
| Sample Set Name:  |              |             | Proc. Chnl. Descr.: |                    |

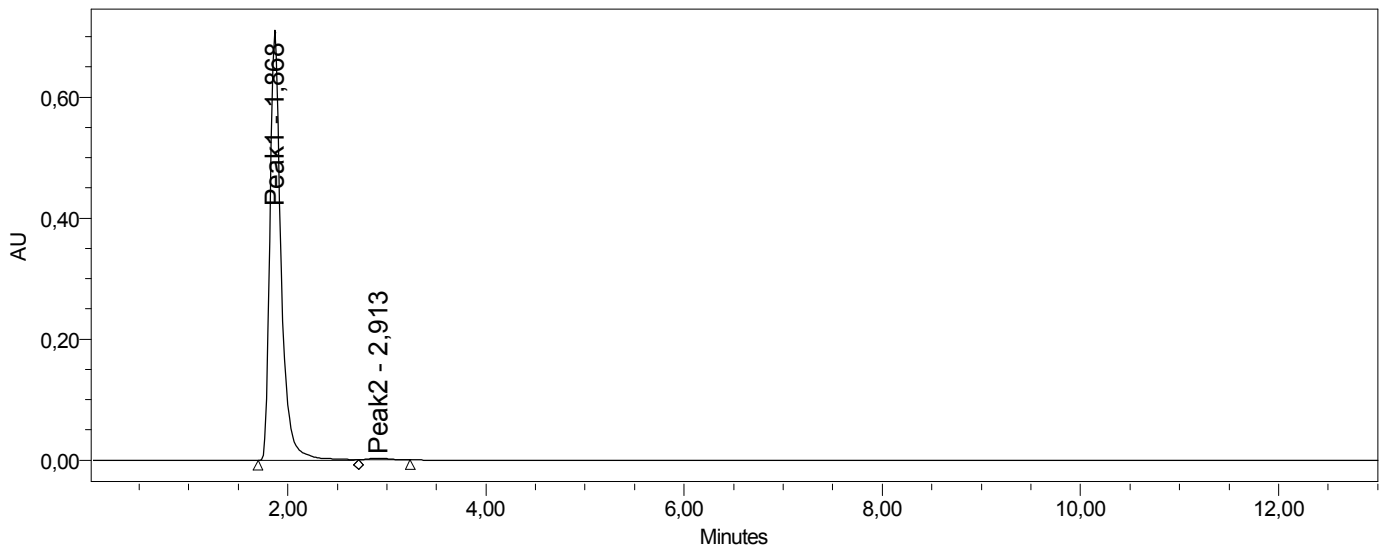

|   | Peak Name | RT    | Area    | % Area | Height |
|---|-----------|-------|---------|--------|--------|
| 1 | Peak1     | 1,868 | 5571036 | 99,31  | 706487 |
| 2 | Peak2     | 2,913 | 38854   | 0,69   | 2378   |

Reported by User: System

Project Name: Organskajedinjenja

SAMPLE INFORMATION

|                   |                   |                     |                    |
|-------------------|-------------------|---------------------|--------------------|
| Sample Name:      | DO199 Compound 43 | Acquired By:        | System             |
| Sample Type:      | Unknown           | Date Acquired:      | 18.7.2012 13:27:44 |
| Vial:             | 9                 | Acq. Method Set:    | 10902543400513m_MS |
| Injection #:      | 1                 | Date Processed:     | 18.7.2012 13:42:47 |
| Injection Volume: | 10,00 ul          | Processing Method:  | DO199              |
| Run Time:         | 13,0 Minutes      | Channel Name:       | 2487Channel 2      |
| Sample Set Name:  |                   | Proc. Chnl. Descr.: |                    |

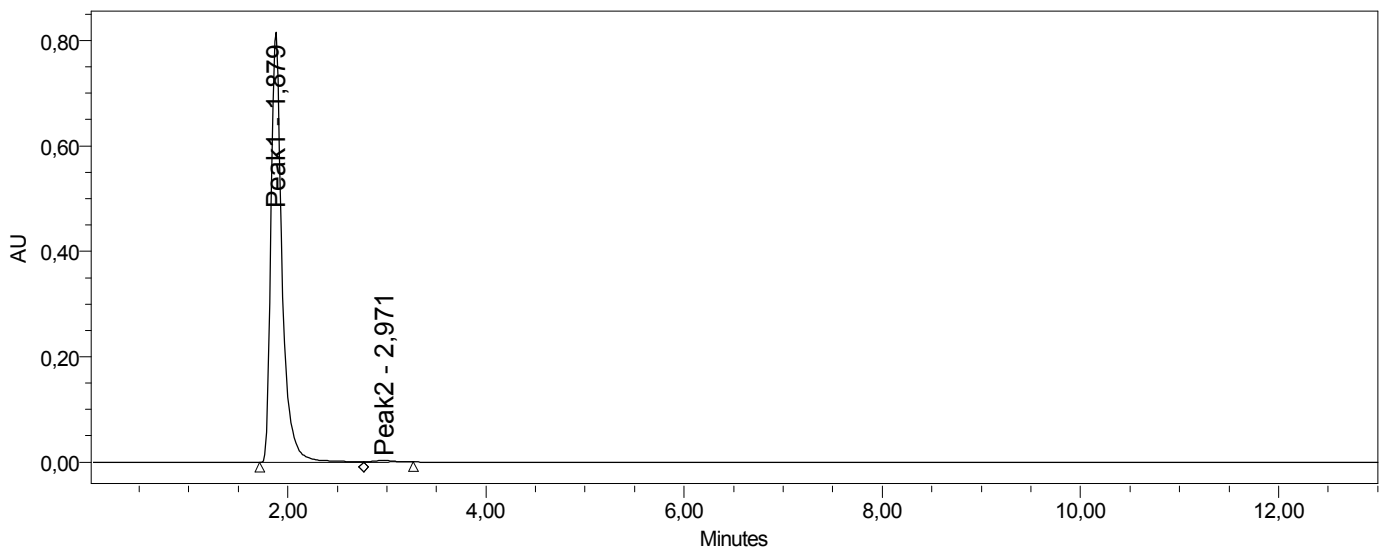

|   | Peak Name | RT    | Area    | % Area | Height |
|---|-----------|-------|---------|--------|--------|
| 1 | Peak1     | 1,879 | 6377676 | 99,37  | 814645 |
| 2 | Peak2     | 2,971 | 40401   | 0,63   | 3137   |

SAMPLE INFORMATION

|                   |              |             |                     |                    |
|-------------------|--------------|-------------|---------------------|--------------------|
| Sample Name:      | ST11         | Compound 44 | Acquired By:        | System             |
| Sample Type:      | Unknown      |             | Date Acquired:      | 18.7.2012 13:41:34 |
| Vial:             | 10           |             | Acq. Method Set:    | 10902543400513m_MS |
| Injection #:      | 1            |             | Date Processed:     | 18.7.2012 13:56:46 |
| Injection Volume: | 10,00 ul     |             | Processing Method:  | ST11               |
| Run Time:         | 13,0 Minutes |             | Channel Name:       | 2487Channel 2      |
| Sample Set Name:  |              |             | Proc. Chnl. Descr.: |                    |

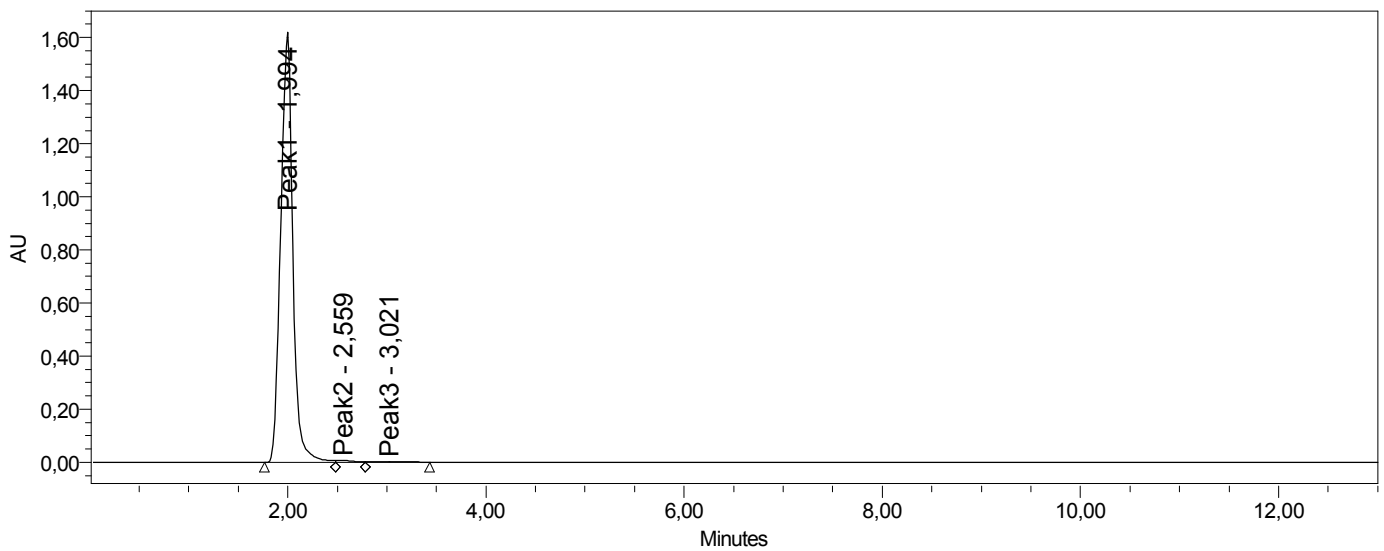

|   | Peak Name | RT    | Area     | % Area | Height  |
|---|-----------|-------|----------|--------|---------|
| 1 | Peak1     | 1,994 | 13768996 | 99,12  | 1618399 |
| 2 | Peak2     | 2,559 | 74020    | 0,53   | 6674    |
| 3 | Peak3     | 3,021 | 48607    | 0,35   | 2175    |

Reported by User: System

Project Name: Organskajedinjenja

SAMPLE INFORMATION

|                   |                  |                     |                    |
|-------------------|------------------|---------------------|--------------------|
| Sample Name:      | MV78 Compound 50 | Acquired By:        | System             |
| Sample Type:      | Unknown          | Date Acquired:      | 19.7.2012 14:28:45 |
| Vial:             | 18               | Acq. Method Set:    | 10902543400513m_MS |
| Injection #:      | 1                | Date Processed:     | 19.7.2012 14:45:14 |
| Injection Volume: | 10,00 ul         | Processing Method:  | MV78               |
| Run Time:         | 13,0 Minutes     | Channel Name:       | 2487Channel 2      |
| Sample Set Name:  |                  | Proc. Chnl. Descr.: |                    |

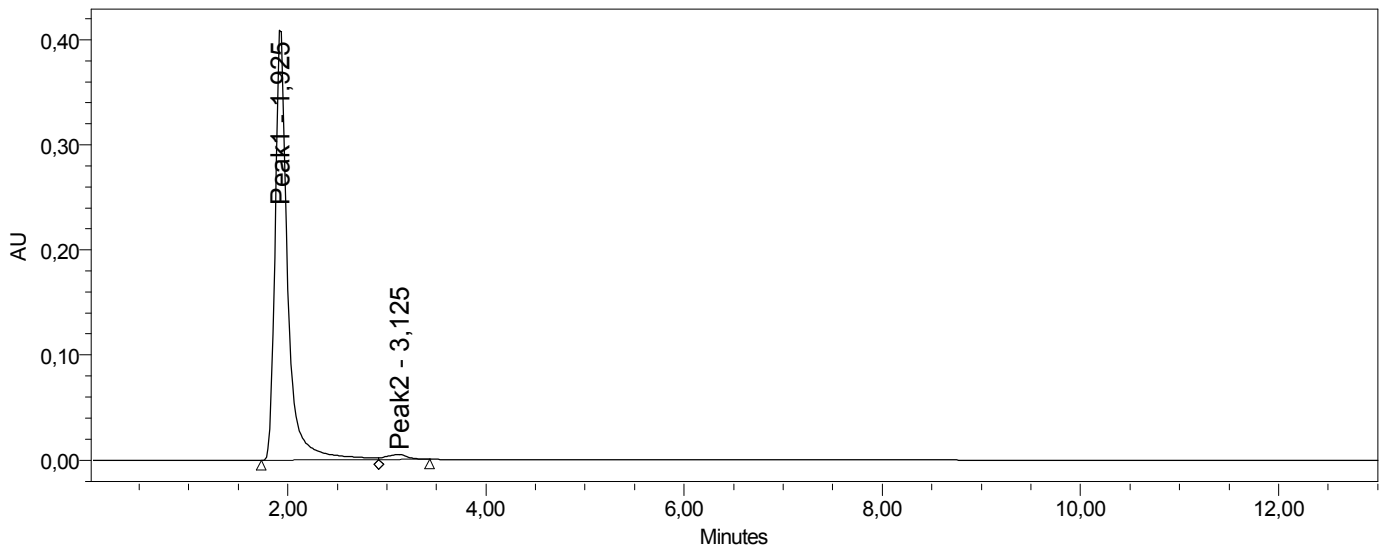

|   | Peak Name | RT    | Area    | % Area | Height |
|---|-----------|-------|---------|--------|--------|
| 1 | Peak1     | 1,925 | 3625124 | 98,15  | 411540 |
| 2 | Peak2     | 3,125 | 68261   | 1,85   | 4922   |

SAMPLE INFORMATION

|                   |              |             |                     |                    |
|-------------------|--------------|-------------|---------------------|--------------------|
| Sample Name:      | MV61         | Compound 51 | Acquired By:        | System             |
| Sample Type:      | Unknown      |             | Date Acquired:      | 18.7.2012 14:40:13 |
| Vial:             | 14           |             | Acq. Method Set:    | 10902543400513m_MS |
| Injection #:      | 1            |             | Date Processed:     | 18.7.2012 14:55:42 |
| Injection Volume: | 10,00 ul     |             | Processing Method:  | MV61               |
| Run Time:         | 13,0 Minutes |             | Channel Name:       | 2487Channel 2      |
| Sample Set Name:  |              |             | Proc. Chnl. Descr.: |                    |

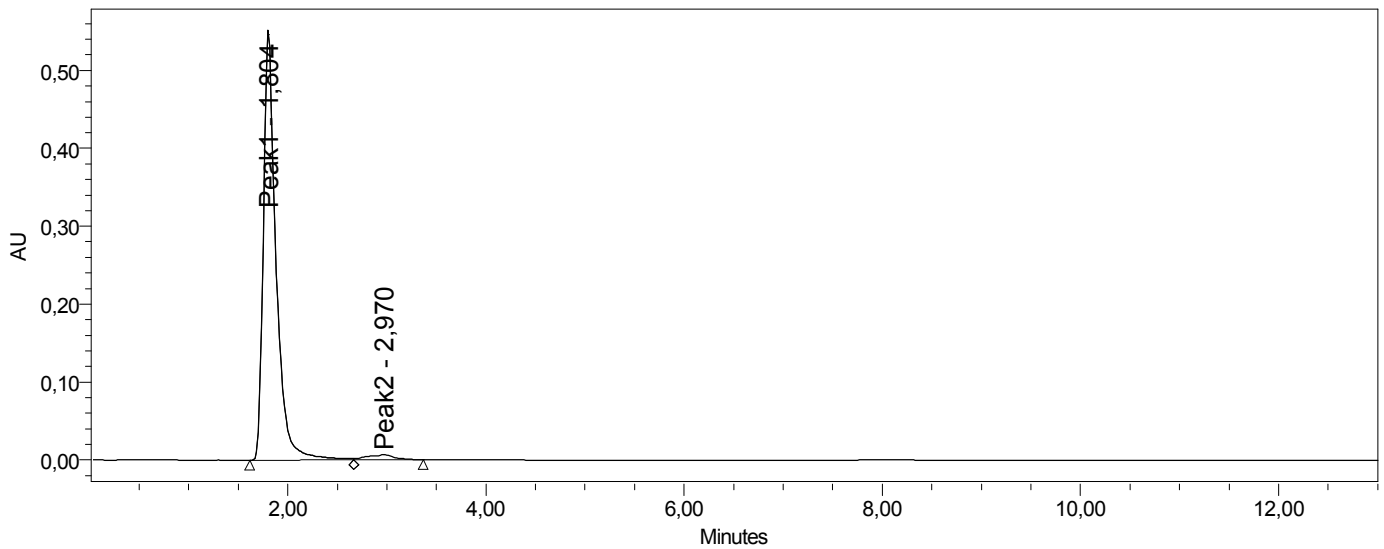

|   | Peak Name | RT    | Area    | % Area | Height |
|---|-----------|-------|---------|--------|--------|
| 1 | Peak1     | 1,804 | 4925314 | 97,63  | 550272 |
| 2 | Peak2     | 2,970 | 119351  | 2,37   | 6371   |



Reported by User: System

Project Name: Organskajedinjenja

SAMPLE INFORMATION

|                   |              |             |                     |                    |
|-------------------|--------------|-------------|---------------------|--------------------|
| Sample Name:      | DO181        | Compound 52 | Acquired By:        | System             |
| Sample Type:      | Unknown      |             | Date Acquired:      | 26.7.2012 11:50:45 |
| Vial:             | 2            |             | Acq. Method Set:    | 10902543400513m_MS |
| Injection #:      | 1            |             | Date Processed:     | 26.7.2012 12:11:51 |
| Injection Volume: | 10,00 ul     |             | Processing Method:  | DO181              |
| Run Time:         | 13,0 Minutes |             | Channel Name:       | 2487Channel 2      |
| Sample Set Name:  |              |             | Proc. Chnl. Descr.: |                    |

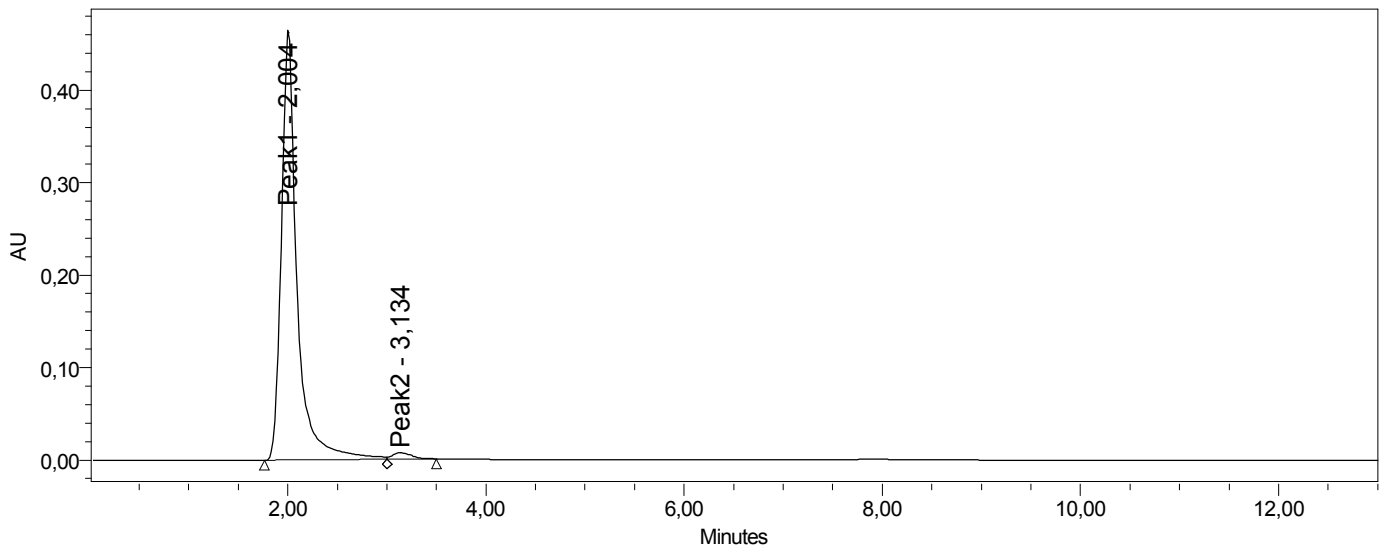

|   | Peak Name | RT    | Area    | % Area | Height |
|---|-----------|-------|---------|--------|--------|
| 1 | Peak1     | 2,004 | 5081751 | 98,23  | 464041 |
| 2 | Peak2     | 3,134 | 91549   | 1,77   | 6875   |

SAMPLE INFORMATION

|                   |              |             |                     |                    |
|-------------------|--------------|-------------|---------------------|--------------------|
| Sample Name:      | ST13         | Compound 54 | Acquired By:        | System             |
| Sample Type:      | Unknown      |             | Date Acquired:      | 18.7.2012 13:55:19 |
| Vial:             | 11           |             | Acq. Method Set:    | 10902543400513m_MS |
| Injection #:      | 1            |             | Date Processed:     | 18.7.2012 14:27:55 |
| Injection Volume: | 10,00 ul     |             | Processing Method:  | ST13               |
| Run Time:         | 13,0 Minutes |             | Channel Name:       | 2487Channel 2      |
| Sample Set Name:  |              |             | Proc. Chnl. Descr.: |                    |

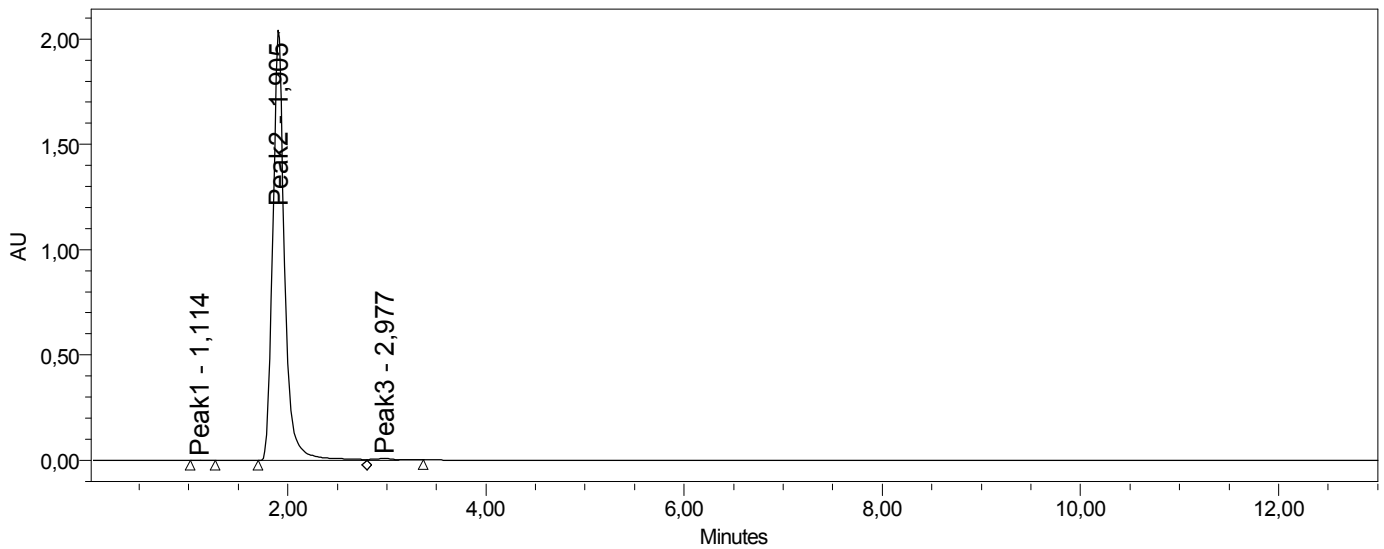

|   | Peak Name | RT    | Area     | % Area | Height  |
|---|-----------|-------|----------|--------|---------|
| 1 | Peak1     | 1,114 | 2682     | 0,02   | 389     |
| 2 | Peak2     | 1,905 | 16841376 | 99,44  | 2040094 |
| 3 | Peak3     | 2,977 | 92952    | 0,55   | 7056    |

Reported by User: System

Project Name: Organskajedinjenja

SAMPLE INFORMATION

|                   |              |             |                     |                    |
|-------------------|--------------|-------------|---------------------|--------------------|
| Sample Name:      | MV29         | Compound 55 | Acquired By:        | System             |
| Sample Type:      | Unknown      |             | Date Acquired:      | 17.8.2012 13:24:21 |
| Vial:             | 14           |             | Acq. Method Set:    | 10902543400513m_MS |
| Injection #:      | 1            |             | Date Processed:     | 17.8.2012 13:38:46 |
| Injection Volume: | 10,00 ul     |             | Processing Method:  | MV29               |
| Run Time:         | 13,0 Minutes |             | Channel Name:       | 2487Channel 2      |
| Sample Set Name:  |              |             | Proc. Chnl. Descr.: |                    |

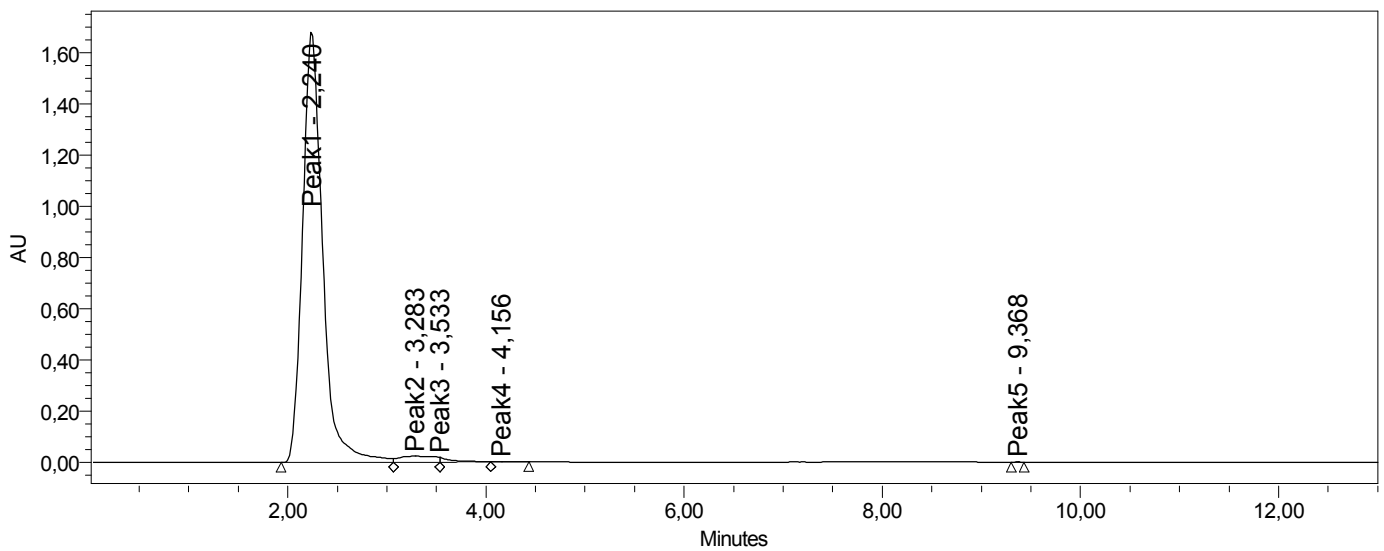

|   | Peak Name | RT    | Area     | % Area | Height  |
|---|-----------|-------|----------|--------|---------|
| 1 | Peak1     | 2,240 | 23588920 | 96,94  | 1682321 |
| 2 | Peak2     | 3,283 | 572035   | 2,35   | 23420   |
| 3 | Peak3     | 3,533 | 149199   | 0,61   | 17852   |
| 4 | Peak4     | 4,156 | 19466    | 0,08   | 1481    |
| 5 | Peak5     | 9,368 | 4506     | 0,02   | 1650    |

Reported by User: System

Project Name: Organskajedinjenja

SAMPLE INFORMATION

|                   |                  |                     |                    |
|-------------------|------------------|---------------------|--------------------|
| Sample Name:      | ST14 Compound 56 | Acquired By:        | System             |
| Sample Type:      | Unknown          | Date Acquired:      | 18.7.2012 14:09:13 |
| Vial:             | 12               | Acq. Method Set:    | 10902543400513m_MS |
| Injection #:      | 1                | Date Processed:     | 18.7.2012 14:29:31 |
| Injection Volume: | 10,00 ul         | Processing Method:  | ST14               |
| Run Time:         | 13,0 Minutes     | Channel Name:       | 2487Channel 2      |
| Sample Set Name:  |                  | Proc. Chnl. Descr.: |                    |

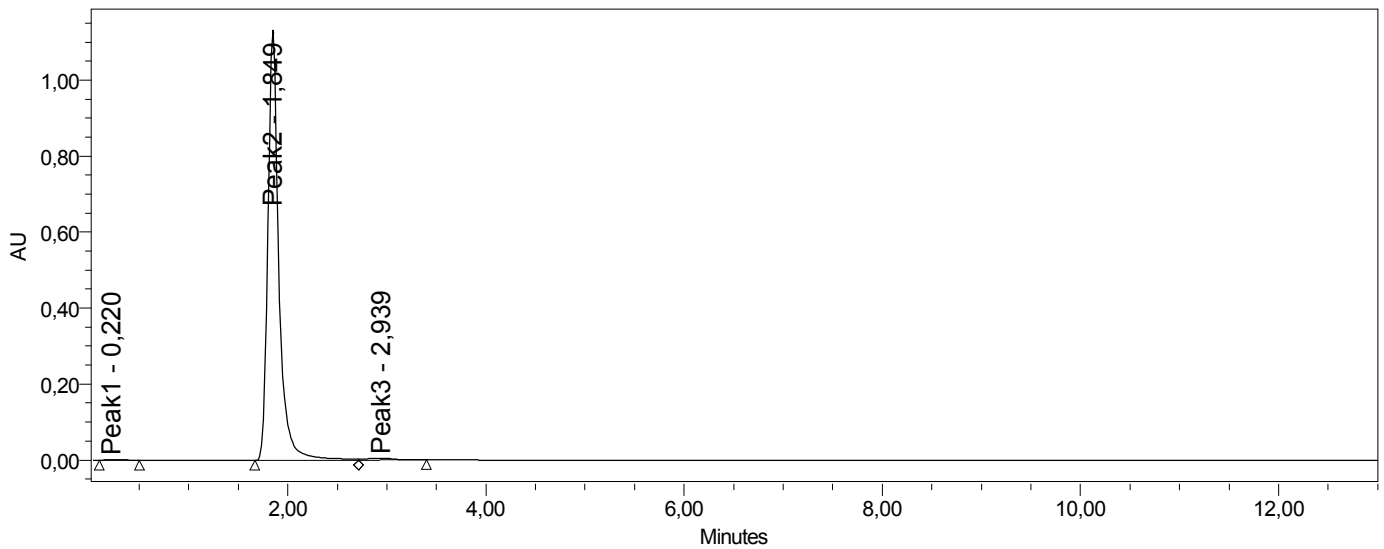

|   | Peak Name | RT    | Area    | % Area | Height  |
|---|-----------|-------|---------|--------|---------|
| 1 | Peak1     | 0,220 | 13715   | 0,16   | 1463    |
| 2 | Peak2     | 1,849 | 8707139 | 98,82  | 1121724 |
| 3 | Peak3     | 2,939 | 89964   | 1,02   | 5042    |

Reported by User: System

Project Name: Organskajedinjenja

SAMPLE INFORMATION

|                   |                   |                     |                    |
|-------------------|-------------------|---------------------|--------------------|
| Sample Name:      | DO180 Compound 60 | Acquired By:        | System             |
| Sample Type:      | Unknown           | Date Acquired:      | 18.7.2012 14:54:03 |
| Vial:             | 15                | Acq. Method Set:    | 10902543400513m_MS |
| Injection #:      | 1                 | Date Processed:     | 18.7.2012 15:09:12 |
| Injection Volume: | 10,00 ul          | Processing Method:  | DO180              |
| Run Time:         | 13,0 Minutes      | Channel Name:       | 2487Channel 2      |
| Sample Set Name:  |                   | Proc. Chnl. Descr.: |                    |

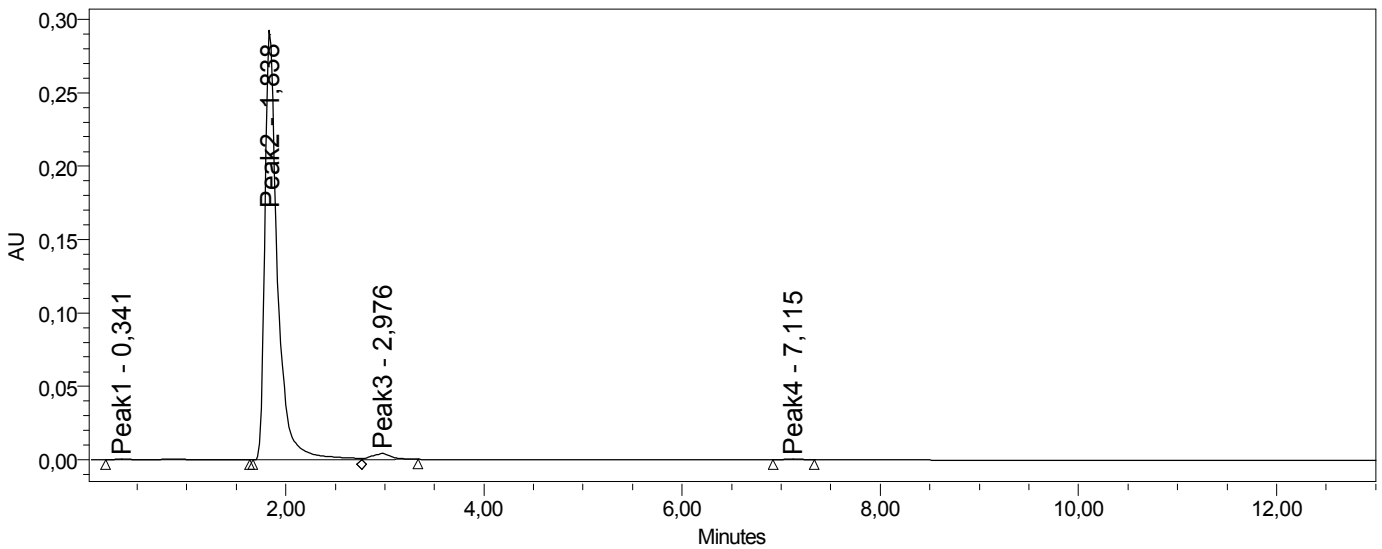

|   | Peak Name | RT    | Area    | % Area | Height |
|---|-----------|-------|---------|--------|--------|
| 1 | Peak1     | 0,341 | 15198   | 0,57   | 398    |
| 2 | Peak2     | 1,838 | 2593563 | 97,10  | 292198 |
| 3 | Peak3     | 2,976 | 55470   | 2,08   | 4070   |
| 4 | Peak4     | 7,115 | 6766    | 0,25   | 595    |

SAMPLE INFORMATION

|                   |                     |                     |                    |
|-------------------|---------------------|---------------------|--------------------|
| Sample Name:      | DO152 6 Compound 12 | Acquired By:        | System             |
| Sample Type:      | Unknown             | Date Acquired:      | 23.5.2012 15:47:45 |
| Vial:             | 10                  | Acq. Method Set:    | 98225434005_MS     |
| Injection #:      | 1                   | Date Processed:     | 9.7.2012 13:20:04  |
| Injection Volume: | 10,00 ul            | Processing Method:  | DO152 10           |
| Run Time:         | 17,0 Minutes        | Channel Name:       | 2487Channel 2      |
| Sample Set Name:  |                     | Proc. Chnl. Descr.: |                    |

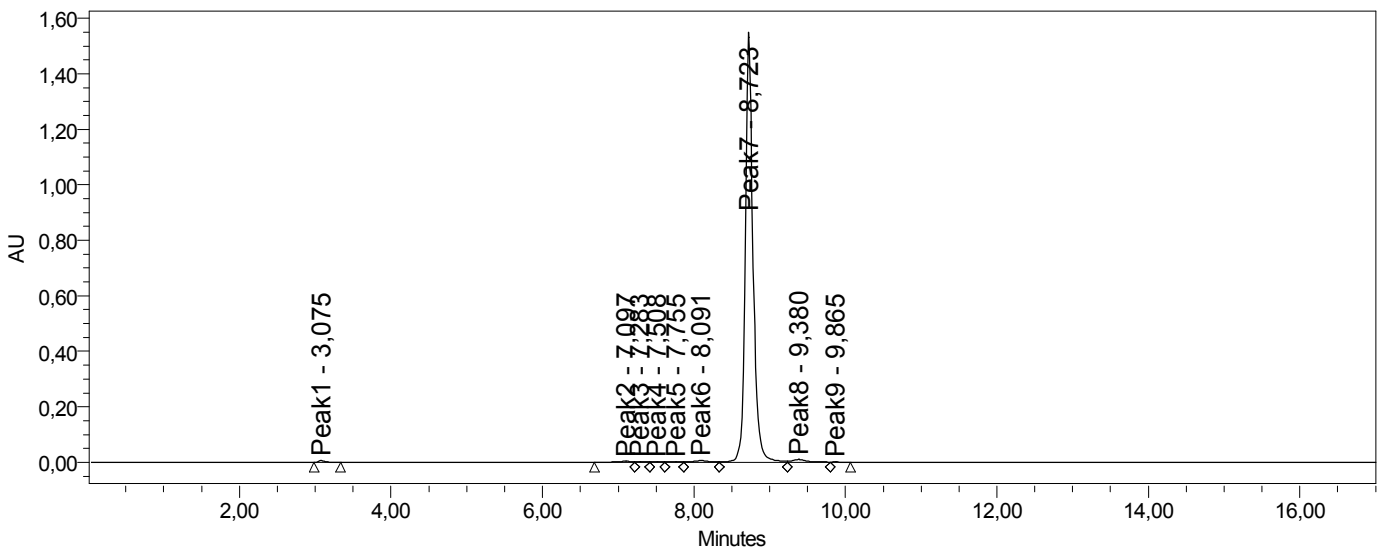

|   | Peak Name | RT    | Area     | % Area | Height  |
|---|-----------|-------|----------|--------|---------|
| 1 | Peak1     | 3,075 | 35790    | 0,31   | 5733    |
| 2 | Peak2     | 7,097 | 50713    | 0,43   | 4047    |
| 3 | Peak3     | 7,283 | 19393    | 0,17   | 1991    |
| 4 | Peak4     | 7,508 | 17530    | 0,15   | 1693    |
| 5 | Peak5     | 7,755 | 20545    | 0,18   | 1582    |
| 6 | Peak6     | 8,091 | 85555    | 0,73   | 5876    |
| 7 | Peak7     | 8,723 | 11308508 | 96,87  | 1546669 |
| 8 | Peak8     | 9,380 | 129209   | 1,11   | 9796    |
| 9 | Peak9     | 9,865 | 6393     | 0,05   | 782     |

SAMPLE INFORMATION

|                   |                  |                     |                   |
|-------------------|------------------|---------------------|-------------------|
| Sample Name:      | DR06 Compound 13 | Acquired By:        | System            |
| Sample Type:      | Unknown          | Date Acquired:      | 9.7.2012 13:33:29 |
| Vial:             | 8                | Acq. Method Set:    | 98225434005_MS    |
| Injection #:      | 1                | Date Processed:     | 9.7.2012 13:57:51 |
| Injection Volume: | 10,00 ul         | Processing Method:  | DR06 8            |
| Run Time:         | 16,0 Minutes     | Channel Name:       | 2487Channel 2     |
| Sample Set Name:  |                  | Proc. Chnl. Descr.: |                   |

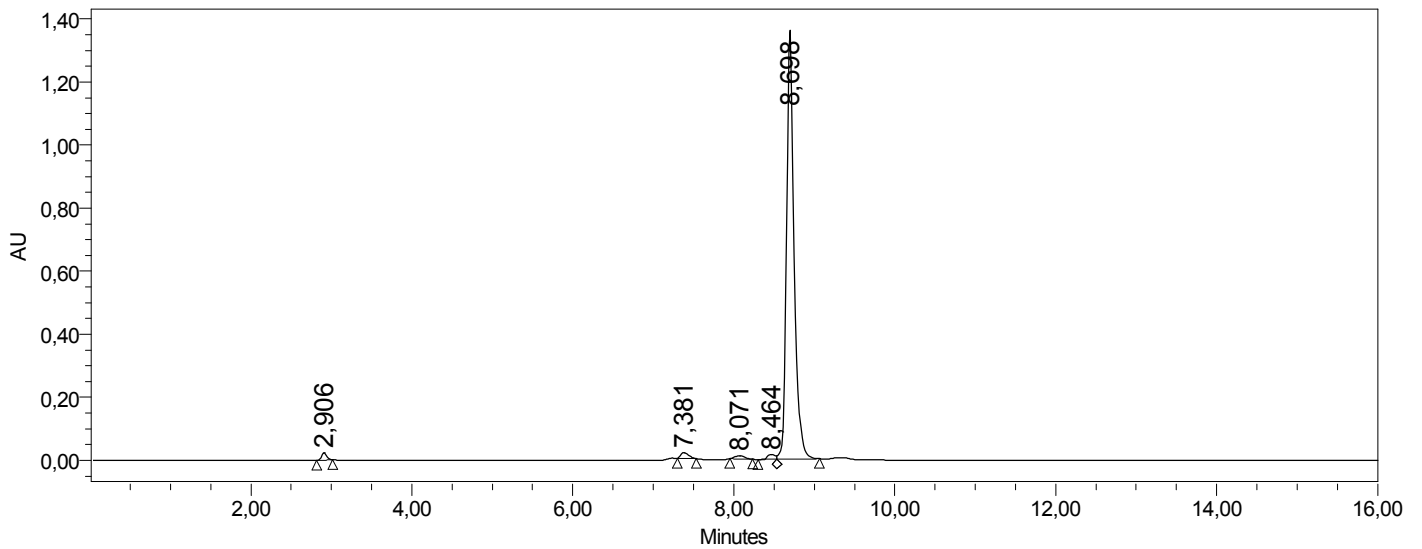

|   | RT    | Area    | % Area | Height  |
|---|-------|---------|--------|---------|
| 1 | 2,906 | 103254  | 1,12   | 22809   |
| 2 | 7,381 | 123863  | 1,35   | 18673   |
| 3 | 8,071 | 87062   | 0,95   | 10796   |
| 4 | 8,464 | 102613  | 1,12   | 15942   |
| 5 | 8,698 | 8763478 | 95,46  | 1347666 |

SAMPLE INFORMATION

|                   |              |             |                     |                   |
|-------------------|--------------|-------------|---------------------|-------------------|
| Sample Name:      | DO183        | Compound 16 | Acquired By:        | System            |
| Sample Type:      | Unknown      |             | Date Acquired:      | 9.7.2012 11:41:35 |
| Vial:             | 2            |             | Acq. Method Set:    | 98225434005_MS    |
| Injection #:      | 1            |             | Date Processed:     | 9.7.2012 12:08:43 |
| Injection Volume: | 10,00 ul     |             | Processing Method:  | DO183 2           |
| Run Time:         | 16,0 Minutes |             | Channel Name:       | 2487Channel 2     |
| Sample Set Name:  |              |             | Proc. Chnl. Descr.: |                   |

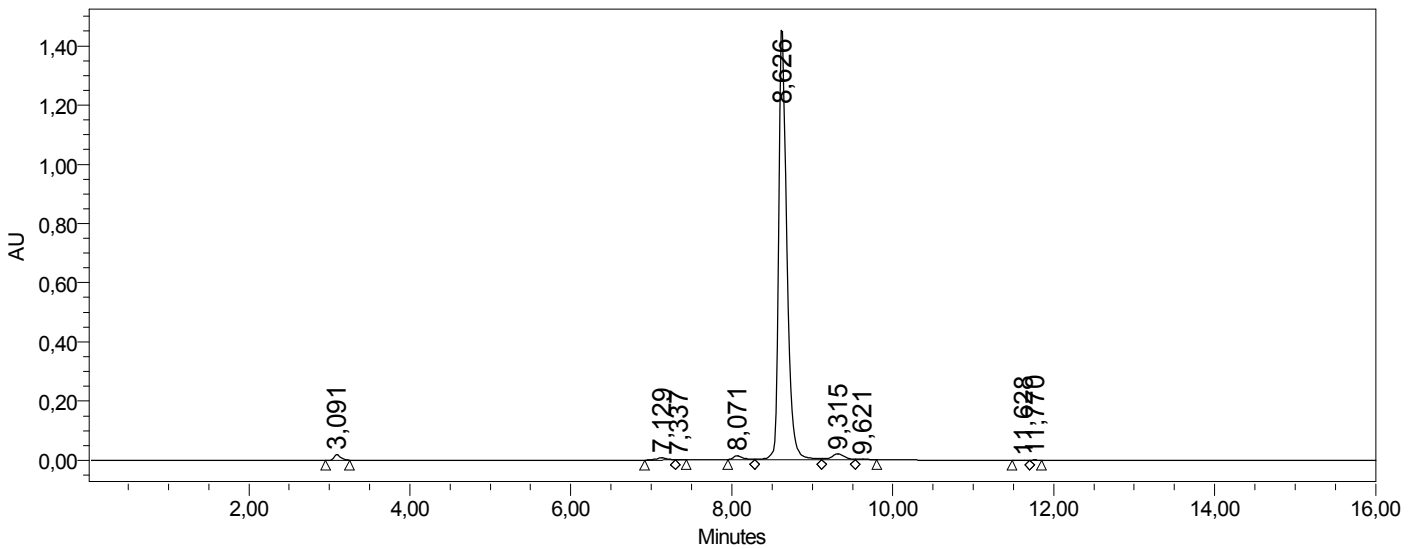

|   | RT     | Area     | % Area | Height  |
|---|--------|----------|--------|---------|
| 1 | 3,091  | 109050   | 1,02   | 19219   |
| 2 | 7,129  | 72970    | 0,68   | 8040    |
| 3 | 7,337  | 6525     | 0,06   | 1407    |
| 4 | 8,071  | 93936    | 0,88   | 12458   |
| 5 | 8,626  | 10133114 | 95,11  | 1466196 |
| 6 | 9,315  | 211542   | 1,99   | 19259   |
| 7 | 9,621  | 19960    | 0,19   | 2303    |
| 8 | 11,628 | 3066     | 0,03   | 378     |
| 9 | 11,770 | 3986     | 0,04   | 1008    |



SAMPLE INFORMATION

|                   |              |             |                     |                    |
|-------------------|--------------|-------------|---------------------|--------------------|
| Sample Name:      | DR07         | Compound 17 | Acquired By:        | System             |
| Sample Type:      | Unknown      |             | Date Acquired:      | 10.7.2012 10:58:51 |
| Vial:             | 1            |             | Acq. Method Set:    | 98225434005_MS     |
| Injection #:      | 1            |             | Date Processed:     | 10.7.2012 11:16:50 |
| Injection Volume: | 10,00 ul     |             | Processing Method:  | DR07               |
| Run Time:         | 16,0 Minutes |             | Channel Name:       | 2487Channel 2      |
| Sample Set Name:  |              |             | Proc. Chnl. Descr.: |                    |

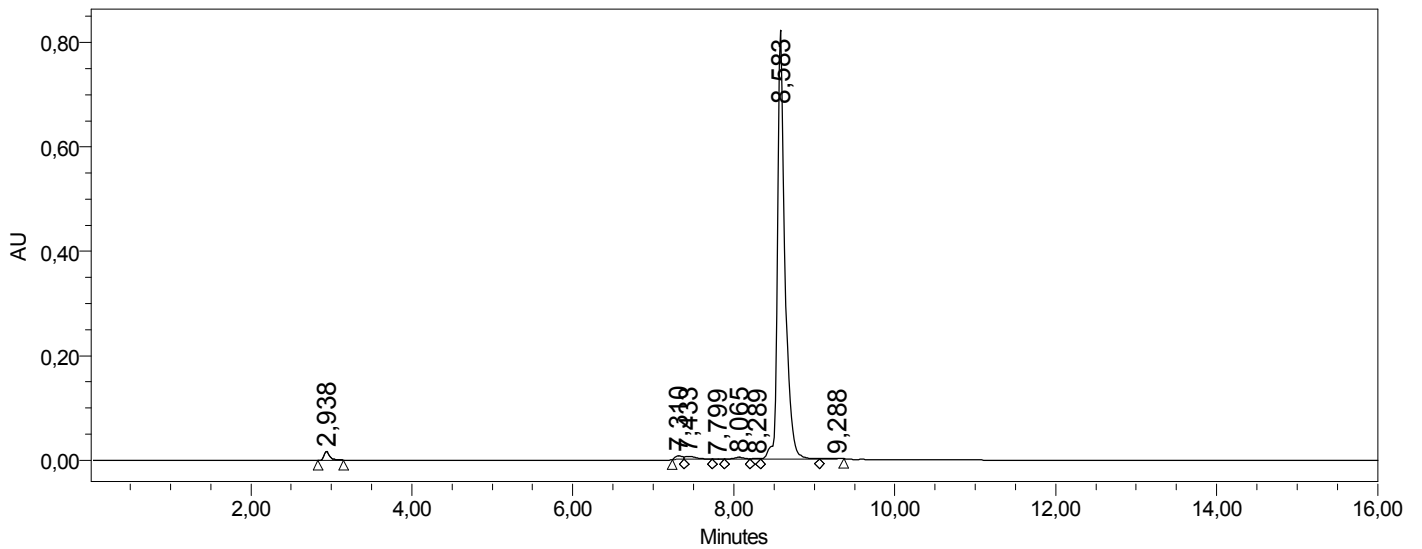

|   | RT    | Area    | % Area | Height |
|---|-------|---------|--------|--------|
| 1 | 2,938 | 85244   | 1,52   | 16912  |
| 2 | 7,310 | 44674   | 0,80   | 7242   |
| 3 | 7,433 | 58121   | 1,04   | 5810   |
| 4 | 7,799 | 988     | 0,02   | 199    |
| 5 | 8,065 | 29315   | 0,52   | 3413   |
| 6 | 8,289 | 9291    | 0,17   | 1746   |
| 7 | 8,583 | 5353520 | 95,71  | 810755 |
| 8 | 9,288 | 12465   | 0,22   | 1433   |

SAMPLE INFORMATION

|                   |              |             |                     |                    |
|-------------------|--------------|-------------|---------------------|--------------------|
| Sample Name:      | DO186        | Compound 20 | Acquired By:        | System             |
| Sample Type:      | Unknown      |             | Date Acquired:      | 10.7.2012 14:55:44 |
| Vial:             | 12           |             | Acq. Method Set:    | 98225434005_MS     |
| Injection #:      | 1            |             | Date Processed:     | 10.7.2012 15:15:03 |
| Injection Volume: | 10,00 ul     |             | Processing Method:  | DO186              |
| Run Time:         | 16,0 Minutes |             | Channel Name:       | 2487Channel 2      |
| Sample Set Name:  |              |             | Proc. Chnl. Descr.: |                    |

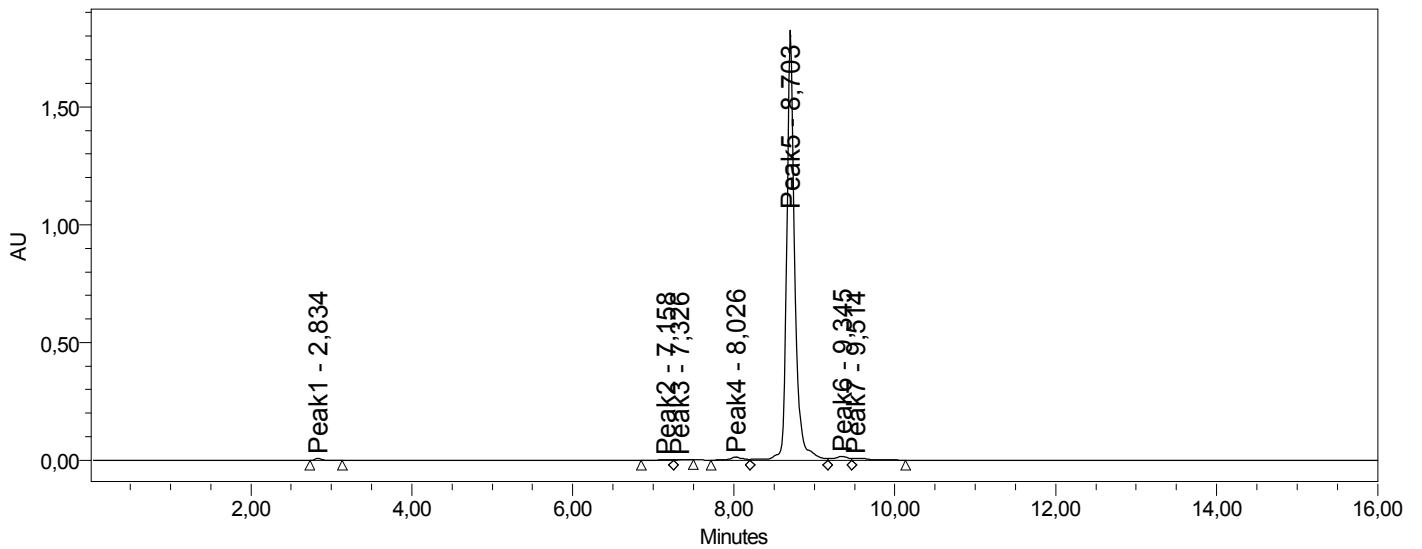

|   | Peak Name | RT    | Area     | % Area | Height  |
|---|-----------|-------|----------|--------|---------|
| 1 | Peak1     | 2,834 | 47150    | 0,36   | 8747    |
| 2 | Peak2     | 7,158 | 20178    | 0,16   | 2104    |
| 3 | Peak3     | 7,326 | 15664    | 0,12   | 2069    |
| 4 | Peak4     | 8,026 | 125759   | 0,97   | 13255   |
| 5 | Peak5     | 8,703 | 12449570 | 96,21  | 1803552 |
| 6 | Peak6     | 9,345 | 178880   | 1,38   | 15269   |
| 7 | Peak7     | 9,514 | 102965   | 0,80   | 6955    |

SAMPLE INFORMATION

|                   |              |             |                     |                    |
|-------------------|--------------|-------------|---------------------|--------------------|
| Sample Name:      | DO193        | Compound 21 | Acquired By:        | System             |
| Sample Type:      | Unknown      |             | Date Acquired:      | 10.7.2012 15:34:31 |
| Vial:             | 14           |             | Acq. Method Set:    | 98225434005_MS     |
| Injection #:      | 1            |             | Date Processed:     | 10.7.2012 15:52:12 |
| Injection Volume: | 10,00 ul     |             | Processing Method:  | DO193              |
| Run Time:         | 16,0 Minutes |             | Channel Name:       | 2487Channel 2      |
| Sample Set Name:  |              |             | Proc. Chnl. Descr.: |                    |

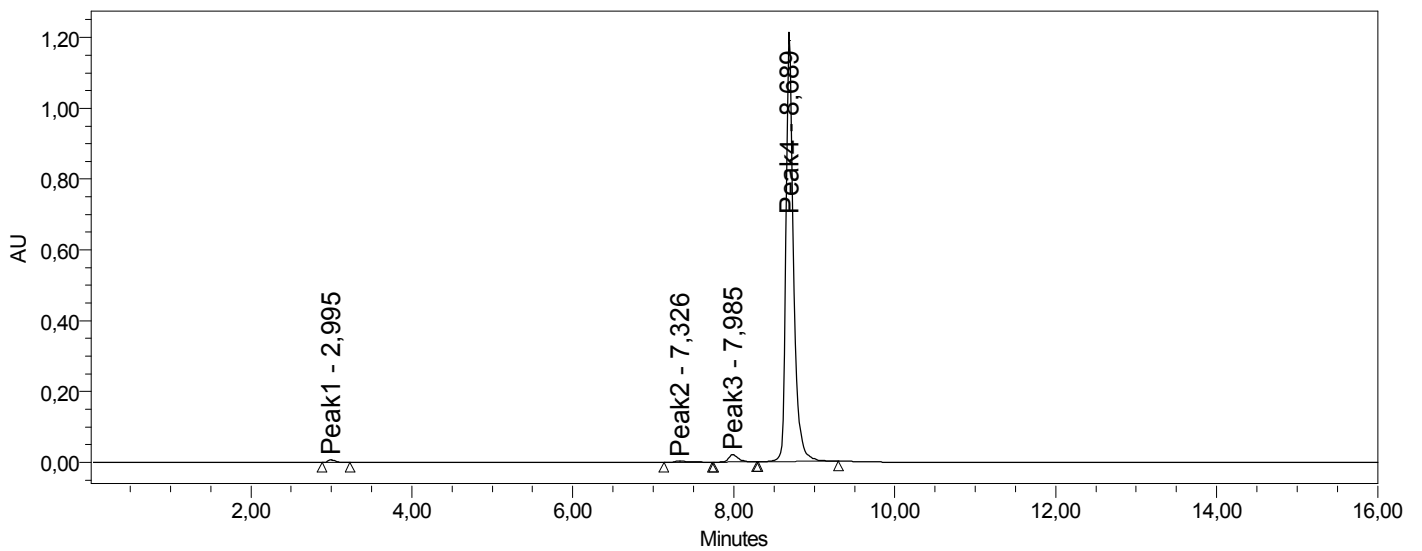

|   | Peak Name | RT    | Area    | % Area | Height  |
|---|-----------|-------|---------|--------|---------|
| 1 | Peak1     | 2,995 | 41857   | 0,52   | 7322    |
| 2 | Peak2     | 7,326 | 36546   | 0,46   | 3048    |
| 3 | Peak3     | 7,985 | 167544  | 2,10   | 21556   |
| 4 | Peak4     | 8,689 | 7750627 | 96,92  | 1204189 |

SAMPLE INFORMATION

|                   |              |             |                     |                   |
|-------------------|--------------|-------------|---------------------|-------------------|
| Sample Name:      | DO184        | Compound 22 | Acquired By:        | System            |
| Sample Type:      | Unknown      |             | Date Acquired:      | 9.7.2012 12:17:50 |
| Vial:             | 4            |             | Acq. Method Set:    | 98225434005_MS    |
| Injection #:      | 1            |             | Date Processed:     | 9.7.2012 13:06:45 |
| Injection Volume: | 10,00 ul     |             | Processing Method:  | DO184 4           |
| Run Time:         | 16,0 Minutes |             | Channel Name:       | 2487Channel 2     |
| Sample Set Name:  |              |             | Proc. Chnl. Descr.: |                   |

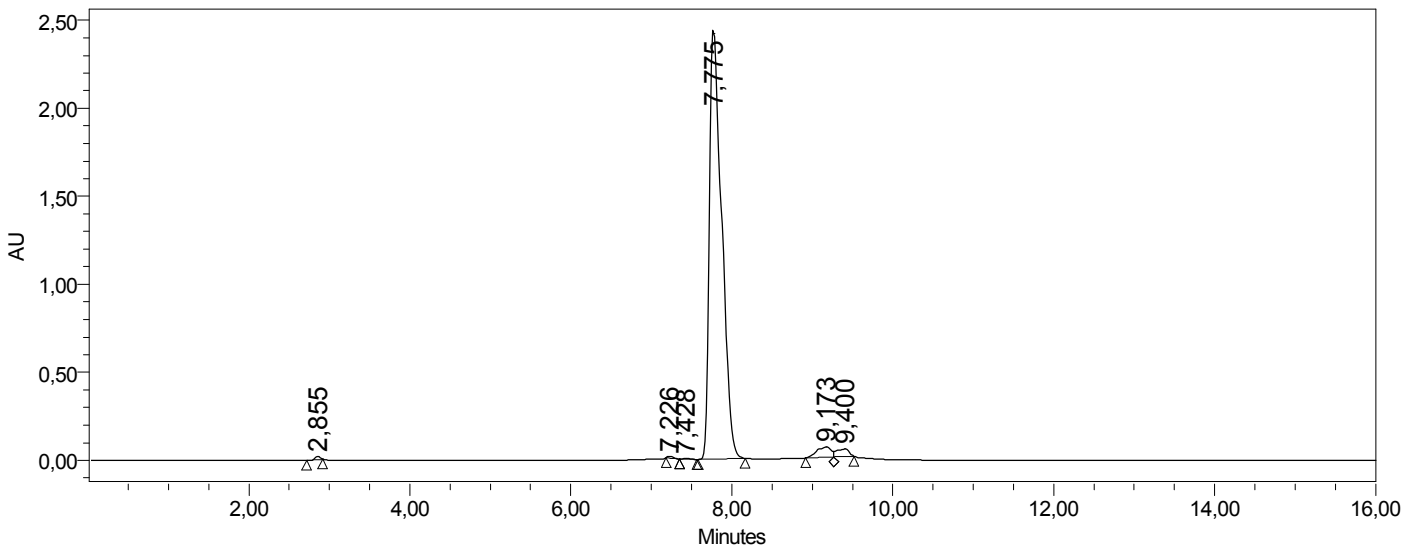

|   | RT    | Area     | % Area | Height  |
|---|-------|----------|--------|---------|
| 1 | 2,855 | 78731    | 0,29   | 19420   |
| 2 | 7,226 | 47556    | 0,18   | 10140   |
| 3 | 7,428 | 25503    | 0,09   | 4210    |
| 4 | 7,775 | 25737693 | 95,05  | 2457603 |
| 5 | 9,173 | 720071   | 2,66   | 57546   |
| 6 | 9,400 | 469672   | 1,73   | 42467   |

Reported by User: System

Project Name: Organskajedinjenja

**SAMPLE INFORMATION**

|                   |              |                    |                     |                    |
|-------------------|--------------|--------------------|---------------------|--------------------|
| Sample Name:      | DO196        | <b>Compound 39</b> | Acquired By:        | System             |
| Sample Type:      | Unknown      |                    | Date Acquired:      | 11.7.2012 13:23:10 |
| Vial:             | 9            |                    | Acq. Method Set:    | 10902543400513m_MS |
| Injection #:      | 1            |                    | Date Processed:     | 11.7.2012 13:49:49 |
| Injection Volume: | 10,00 ul     |                    | Processing Method:  | Do196              |
| Run Time:         | 13,0 Minutes |                    | Channel Name:       | 2487Channel 2      |
| Sample Set Name:  |              |                    | Proc. Chnl. Descr.: |                    |

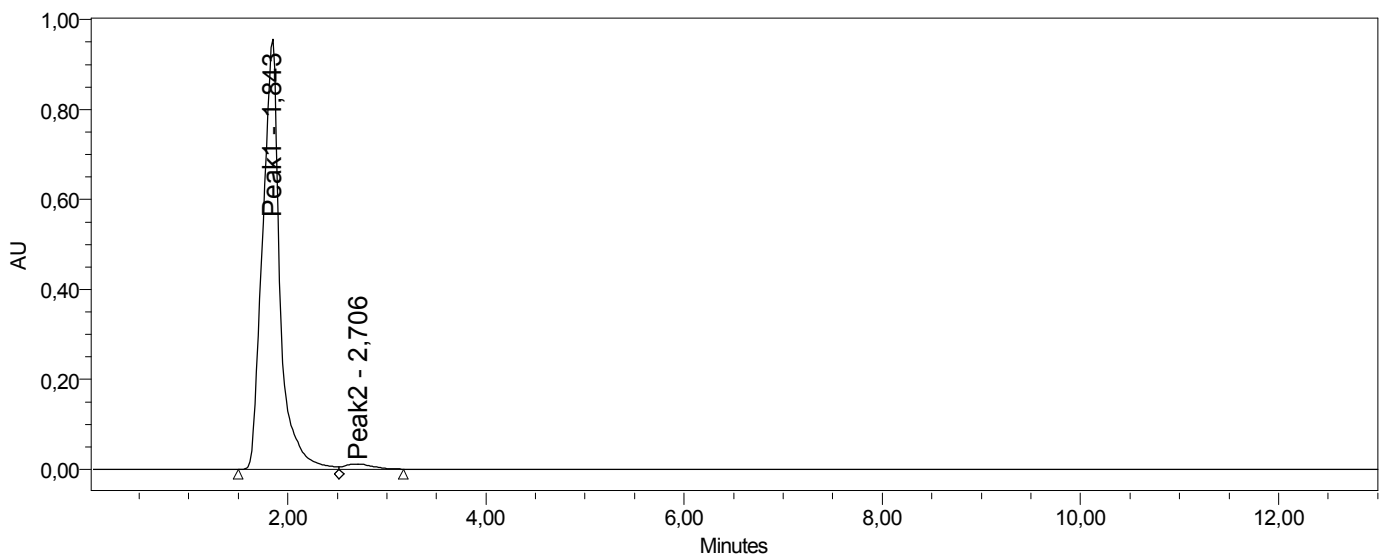

|   | Peak Name | RT    | Area     | % Area | Height |
|---|-----------|-------|----------|--------|--------|
| 1 | Peak1     | 1,843 | 11643932 | 98,21  | 958195 |
| 2 | Peak2     | 2,706 | 212803   | 1,79   | 11120  |

SAMPLE INFORMATION

|                   |                   |                     |                    |
|-------------------|-------------------|---------------------|--------------------|
| Sample Name:      | DO179 Compound 40 | Acquired By:        | System             |
| Sample Type:      | Unknown           | Date Acquired:      | 10.7.2012 12:27:16 |
| Vial:             | 5                 | Acq. Method Set:    | 98225434005_MS     |
| Injection #:      | 1                 | Date Processed:     | 10.7.2012 12:45:56 |
| Injection Volume: | 10,00 ul          | Processing Method:  | DO179              |
| Run Time:         | 16,0 Minutes      | Channel Name:       | 2487Channel 2      |
| Sample Set Name:  |                   | Proc. Chnl. Descr.: |                    |

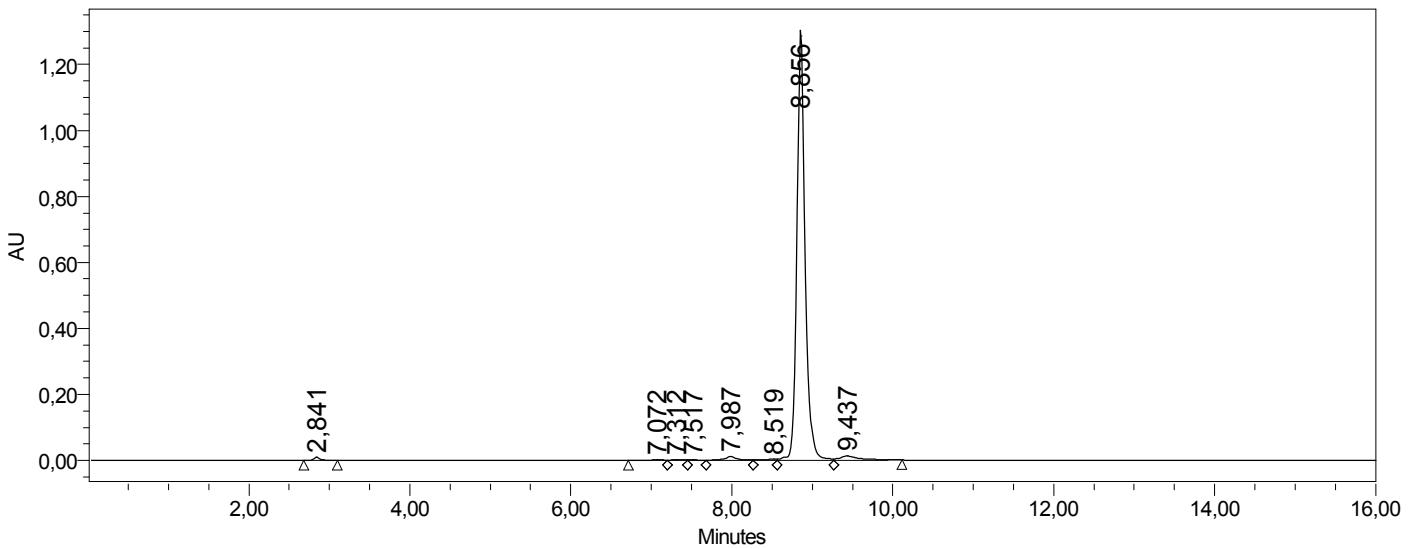

|   | RT    | Area    | % Area | Height  |
|---|-------|---------|--------|---------|
| 1 | 2,841 | 50248   | 0,53   | 8937    |
| 2 | 7,072 | 20870   | 0,22   | 2116    |
| 3 | 7,312 | 18966   | 0,20   | 1942    |
| 4 | 7,517 | 9047    | 0,10   | 859     |
| 5 | 7,987 | 118230  | 1,24   | 12090   |
| 6 | 8,519 | 33517   | 0,35   | 3359    |
| 7 | 8,856 | 9054210 | 95,25  | 1298066 |
| 8 | 9,437 | 201127  | 2,12   | 12718   |

SAMPLE INFORMATION

|                   |                   |                     |                    |
|-------------------|-------------------|---------------------|--------------------|
| Sample Name:      | DO197 Compound 42 | Acquired By:        | System             |
| Sample Type:      | Unknown           | Date Acquired:      | 11.7.2012 13:59:42 |
| Vial:             | 11                | Acq. Method Set:    | 10902543400513m_MS |
| Injection #:      | 1                 | Date Processed:     | 11.7.2012 14:16:19 |
| Injection Volume: | 10,00 ul          | Processing Method:  | DO197              |
| Run Time:         | 13,0 Minutes      | Channel Name:       | 2487Channel 2      |
| Sample Set Name:  |                   | Proc. Chnl. Descr.: |                    |

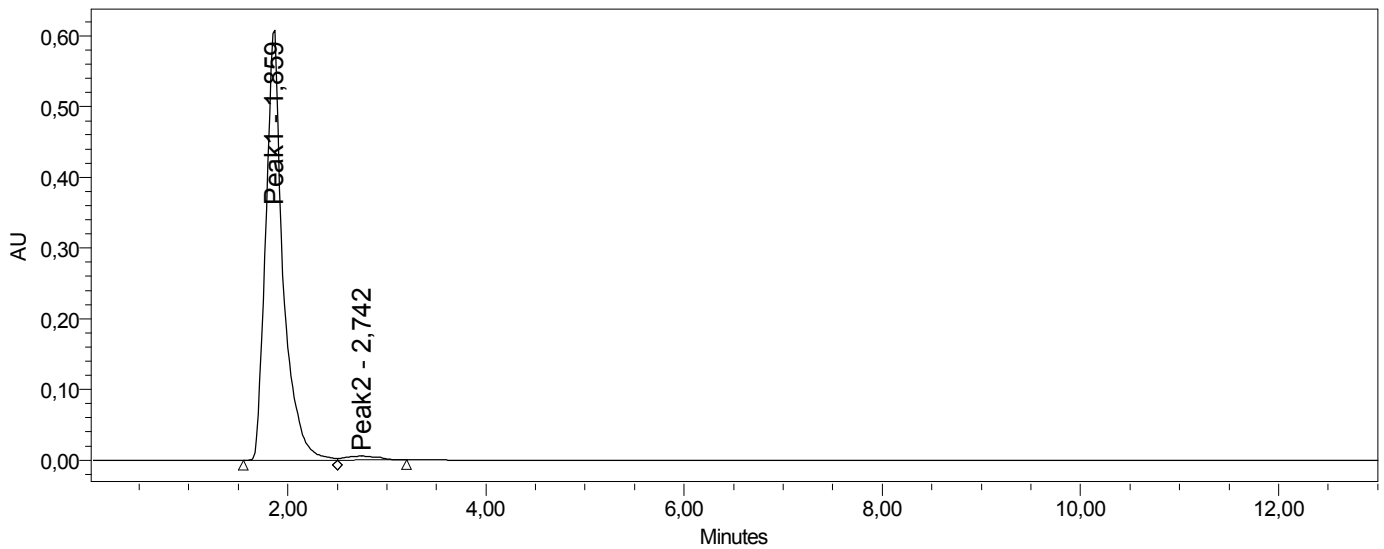

|   | Peak Name | RT    | Area    | % Area | Height |
|---|-----------|-------|---------|--------|--------|
| 1 | Peak1     | 1,859 | 7406062 | 98,31  | 609527 |
| 2 | Peak2     | 2,742 | 127100  | 1,69   | 5603   |

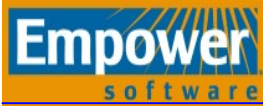

Reported by User: System

Project Name: Organskajedinjenja

SAMPLE INFORMATION

|                   |              |             |                     |                    |
|-------------------|--------------|-------------|---------------------|--------------------|
| Sample Name:      | DO199        | Compound 43 | Acquired By:        | System             |
| Sample Type:      | Unknown      |             | Date Acquired:      | 11.7.2012 13:07:43 |
| Vial:             | 8            |             | Acq. Method Set:    | 10902543400513m_MS |
| Injection #:      | 1            |             | Date Processed:     | 22.8.2012 9:38:17  |
| Injection Volume: | 10,00 ul     |             | Processing Method:  | DO199              |
| Run Time:         | 13,0 Minutes |             | Channel Name:       | 2487Channel 2      |
| Sample Set Name:  |              |             | Proc. Chnl. Descr.: |                    |

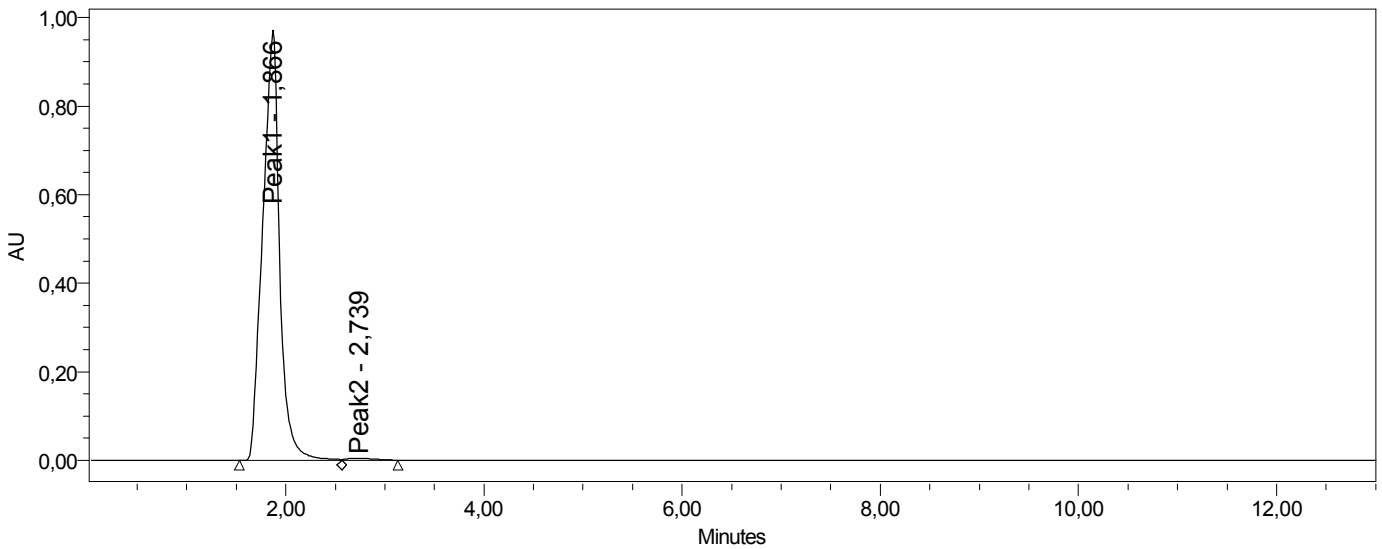

|   | Peak Name | RT    | Area     | % Area | Height |
|---|-----------|-------|----------|--------|--------|
| 1 | Peak1     | 1,866 | 11502563 | 99,37  | 969345 |
| 2 | Peak2     | 2,739 | 72644    | 0,63   | 4037   |



SAMPLE INFORMATION

|                   |                  |                     |                    |
|-------------------|------------------|---------------------|--------------------|
| Sample Name:      | NV78 Compound 50 | Acquired By:        | System             |
| Sample Type:      | Unknown          | Date Acquired:      | 10.7.2012 15:13:58 |
| Vial:             | 13               | Acq. Method Set:    | 98225434005_MS     |
| Injection #:      | 1                | Date Processed:     | 10.7.2012 15:35:48 |
| Injection Volume: | 10,00 ul         | Processing Method:  | MV78               |
| Run Time:         | 16,0 Minutes     | Channel Name:       | 2487Channel 2      |
| Sample Set Name:  |                  | Proc. Chnl. Descr.: |                    |

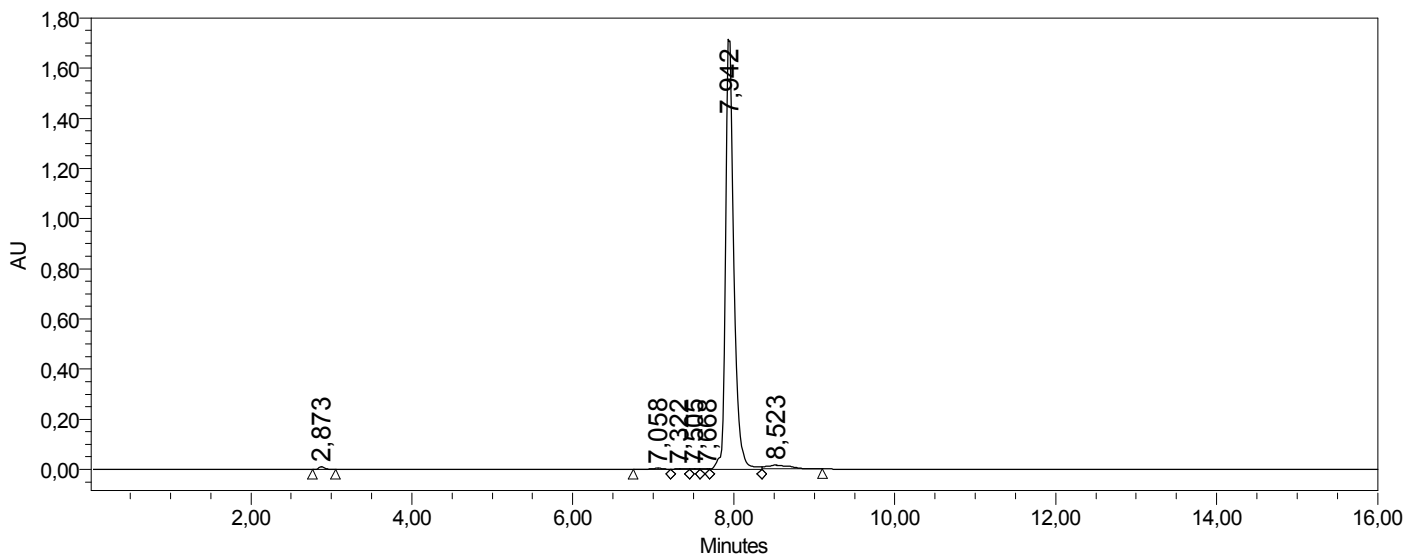

|   | RT    | Area     | % Area | Height  |
|---|-------|----------|--------|---------|
| 1 | 2,873 | 47104    | 0,38   | 9512    |
| 2 | 7,058 | 37378    | 0,30   | 4081    |
| 3 | 7,322 | 21853    | 0,18   | 2906    |
| 4 | 7,505 | 6308     | 0,05   | 912     |
| 5 | 7,668 | 8073     | 0,07   | 1486    |
| 6 | 7,942 | 11897269 | 96,45  | 1728281 |
| 7 | 8,523 | 317314   | 2,57   | 15479   |

SAMPLE INFORMATION

|                   |                   |                     |                    |
|-------------------|-------------------|---------------------|--------------------|
| Sample Name:      | DO181 Compound 52 | Acquired By:        | System             |
| Sample Type:      | Unknown           | Date Acquired:      | 10.7.2012 12:10:12 |
| Vial:             | 4                 | Acq. Method Set:    | 98225434005_MS     |
| Injection #:      | 1                 | Date Processed:     | 10.7.2012 12:34:01 |
| Injection Volume: | 10,00 ul          | Processing Method:  | DO181              |
| Run Time:         | 16,0 Minutes      | Channel Name:       | 2487Channel 2      |
| Sample Set Name:  |                   | Proc. Chnl. Descr.: |                    |

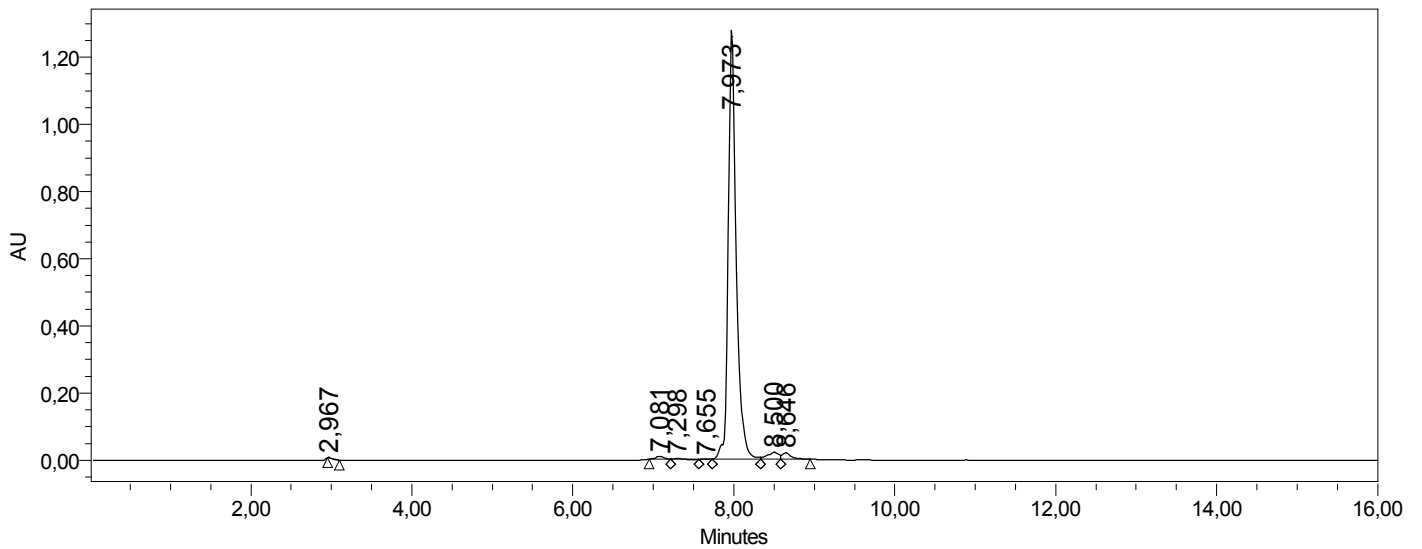

|   | RT    | Area    | % Area | Height  |
|---|-------|---------|--------|---------|
| 1 | 2,967 | 9899    | 0,11   | 1955    |
| 2 | 7,081 | 60180   | 0,66   | 8892    |
| 3 | 7,298 | 18844   | 0,21   | 2095    |
| 4 | 7,655 | 7613    | 0,08   | 1125    |
| 5 | 7,973 | 8694118 | 95,08  | 1275092 |
| 6 | 8,500 | 203211  | 2,22   | 20936   |
| 7 | 8,646 | 149925  | 1,64   | 18766   |

Reported by User: System

Project Name: Organskajedinjenja

SAMPLE INFORMATION

|                   |              |             |                     |                   |
|-------------------|--------------|-------------|---------------------|-------------------|
| Sample Name:      | MV29         | Compound 55 | Acquired By:        | System            |
| Sample Type:      | Unknown      |             | Date Acquired:      | 8.8.2012 10:34:01 |
| Vial:             | 3            |             | Acq. Method Set:    | 6942543400513m_MS |
| Injection #:      | 1            |             | Date Processed:     | 8.8.2012 10:48:19 |
| Injection Volume: | 10,00 ul     |             | Processing Method:  | MV29k2            |
| Run Time:         | 13,0 Minutes |             | Channel Name:       | 2487Channel 2     |
| Sample Set Name:  |              |             | Proc. Chnl. Descr.: |                   |

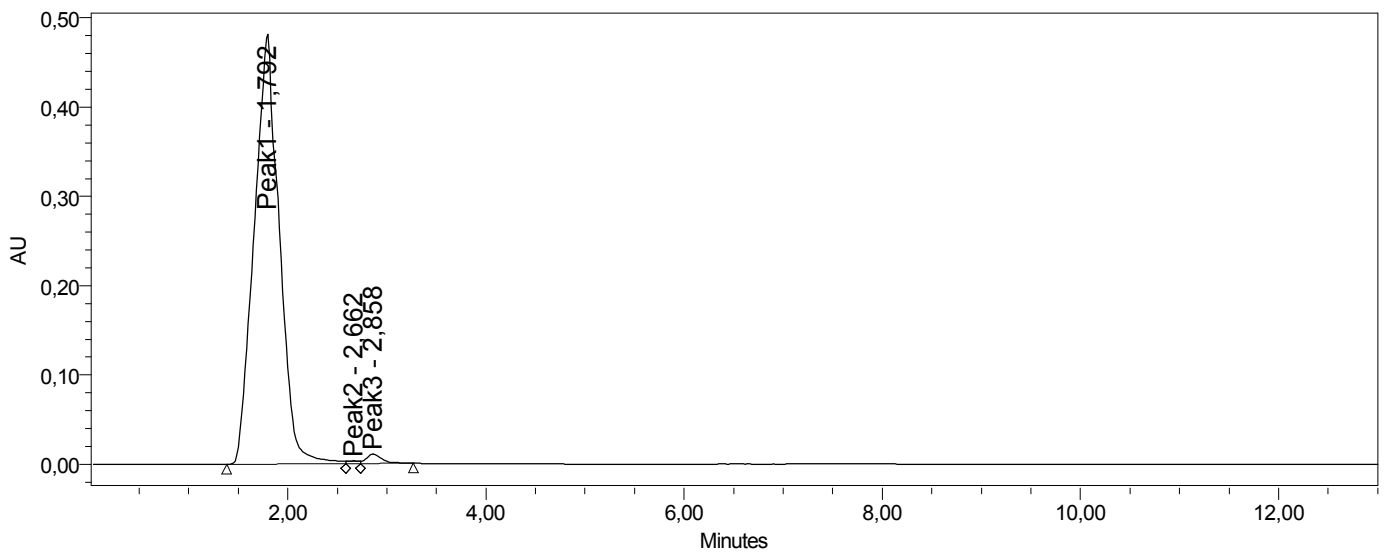

|   | Peak Name | RT    | Area    | % Area | Height |
|---|-----------|-------|---------|--------|--------|
| 1 | Peak1     | 1,792 | 8498337 | 98,41  | 482280 |
| 2 | Peak2     | 2,662 | 23495   | 0,27   | 2952   |
| 3 | Peak3     | 2,858 | 114002  | 1,32   | 10699  |

Reported by User: System

Project Name: Organskajedinjenja

SAMPLE INFORMATION

|                   |                  |                     |                    |
|-------------------|------------------|---------------------|--------------------|
| Sample Name:      | JK05 Compound 62 | Acquired By:        | System             |
| Sample Type:      | Unknown          | Date Acquired:      | 13.7.2012 14:03:35 |
| Vial:             | 16               | Acq. Method Set:    | 10902543400513m_MS |
| Injection #:      | 1                | Date Processed:     | 13.7.2012 14:18:46 |
| Injection Volume: | 10,00 ul         | Processing Method:  | JK05               |
| Run Time:         | 13,0 Minutes     | Channel Name:       | 2487Channel 2      |
| Sample Set Name:  |                  | Proc. Chnl. Descr.: |                    |

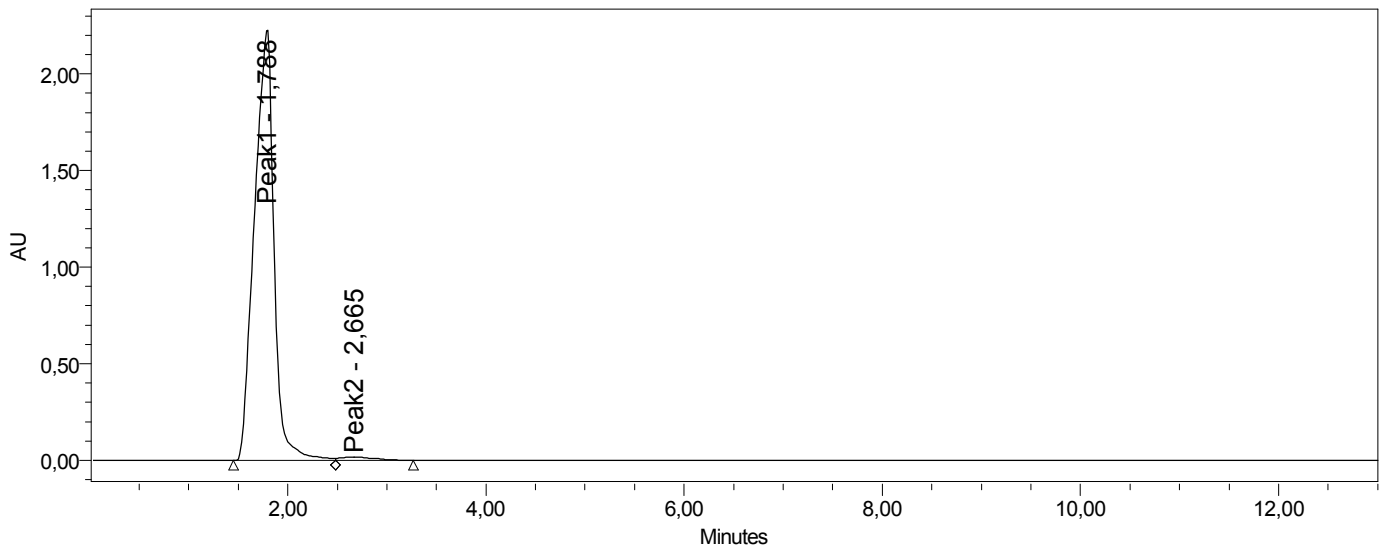

|   | Peak Name | RT    | Area     | % Area | Height  |
|---|-----------|-------|----------|--------|---------|
| 1 | Peak1     | 1,788 | 30564596 | 98,83  | 2254359 |
| 2 | Peak2     | 2,665 | 362651   | 1,17   | 16434   |

```

=====
Acq. Operator   : SYSTEM
Acq. Instrument : HPLC-Solaja           Location  : Vial 84
Injection Date  : 2/26/2014 8:46:43 PM
                                           Inj Volume : 3.000 µl

Acq. Method     : C:\CHEM32\1\METHODS\METODA 7.M
Last changed    : 2/26/2014 8:44:29 PM by SYSTEM
                 (modified after loading)

Analysis Method  : C:\CHEM32\1\METHODS\PRANJE.M
Last changed    : 9/18/2013 2:53:53 PM by SYSTEM
=====
  
```

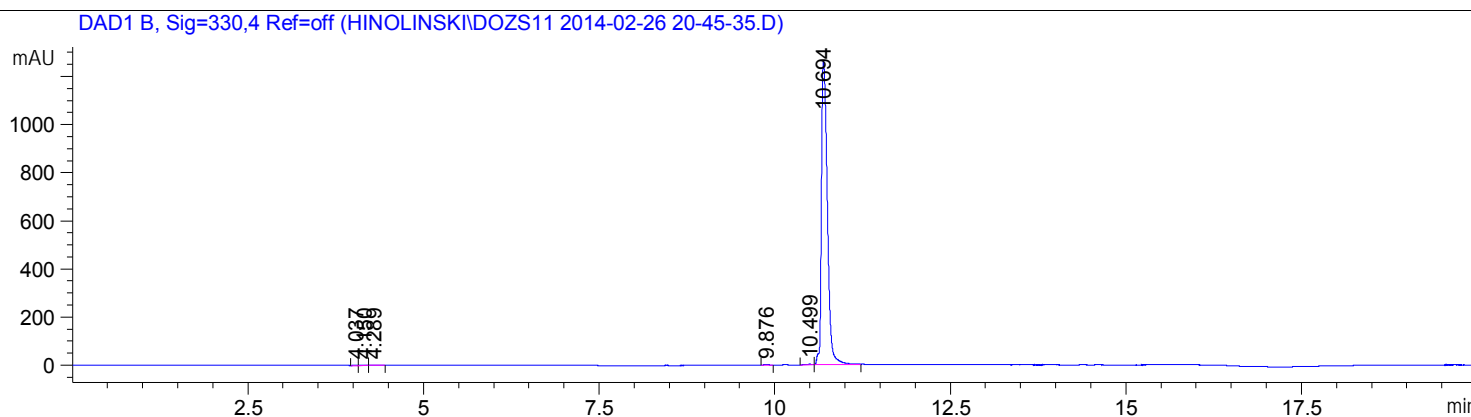

Fraction Information

No Fractions found.

Area Percent Report

```

Sorted By       : Signal
Multiplier      : 1.0000
Dilution        : 1.0000
Use Multiplier & Dilution Factor with ISTDs
  
```

Signal 2: DAD1 B, Sig=330,4 Ref=off

| Peak # | RetTime [min] | Type | Width [min] | Area [mAU*s] | Height [mAU] | Area %  |
|--------|---------------|------|-------------|--------------|--------------|---------|
| 1      | 4.037         | BV   | 0.0563      | 8.69776      | 2.10002      | 0.1166  |
| 2      | 4.150         | VV   | 0.0837      | 17.49445     | 2.59416      | 0.2346  |
| 3      | 4.289         | VB   | 0.0951      | 13.40362     | 1.67149      | 0.1797  |
| 4      | 9.876         | VB   | 0.0708      | 8.55184      | 1.57636      | 0.1147  |
| 5      | 10.499        | BV   | 0.0819      | 15.50056     | 2.38157      | 0.2078  |
| 6      | 10.694        | VB   | 0.0931      | 7394.27734   | 1258.24707   | 99.1466 |

Totals : 7457.92557 1268.57067

\*\*\* End of Report \*\*\*

```
=====
Acq. Operator   : SYSTEM
Acq. Instrument : HPLC-Solaja           Location : Vial 22
Injection Date  : 2/20/2014 10:29:16 AM
                                           Inj Volume : 7.500 µl
Acq. Method     : C:\CHEM32\1\METHODS\METODA 7.M
Last changed    : 2/20/2014 10:40:45 AM by SYSTEM
                  (modified after loading)
Analysis Method  : C:\CHEM32\1\METHODS\METODA 7.M
Last changed    : 2/19/2014 3:10:21 PM by SYSTEM
=====
```

DAD1 B, Sig=330,4 Ref=off (HINOLINSKI\DOJK06 2014-02-20 10-28-03.D)

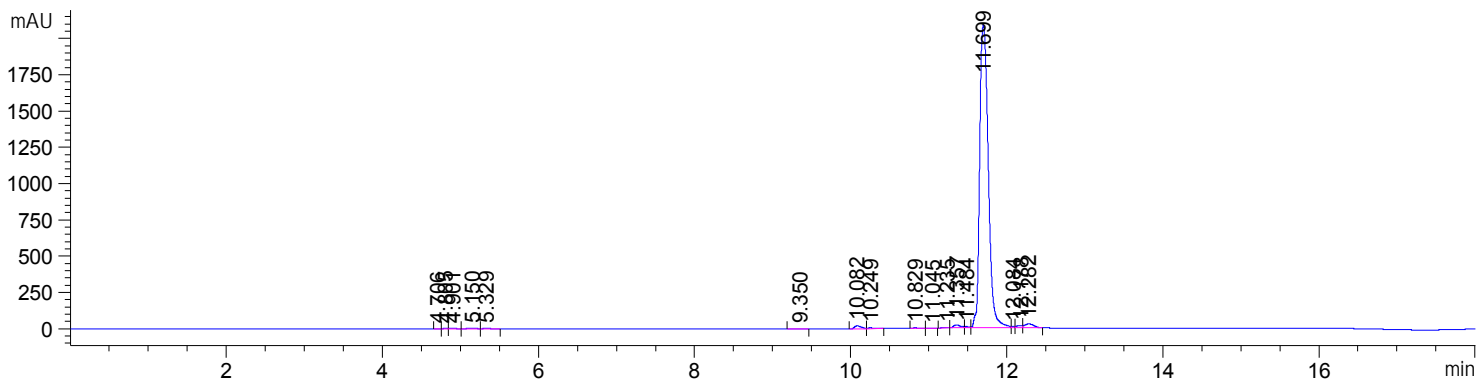

```
=====
Fraction Information
=====
```

No Fractions found.

```
=====
Area Percent Report
=====
```

```
Sorted By      :      Signal
Multiplier     :      1.0000
Dilution       :      1.0000
Use Multiplier & Dilution Factor with ISTDs
```

Sample Name: JK06

Signal 2: DAD1 B, Sig=330,4 Ref=off

| Peak # | RetTime [min] | Type | Width [min] | Area [mAU*s] | Height [mAU] | Area %  |
|--------|---------------|------|-------------|--------------|--------------|---------|
| 1      | 4.706         | VV   | 0.0622      | 7.23272      | 1.42613      | 0.0431  |
| 2      | 4.805         | VV   | 0.0586      | 11.70099     | 2.67164      | 0.0697  |
| 3      | 4.901         | VB   | 0.0796      | 16.67839     | 2.55658      | 0.0993  |
| 4      | 5.150         | BV   | 0.1040      | 21.87318     | 2.49038      | 0.1302  |
| 5      | 5.329         | VB   | 0.0821      | 8.87225      | 1.28471      | 0.0528  |
| 6      | 9.350         | BB   | 0.0972      | 8.60202      | 1.04878      | 0.0512  |
| 7      | 10.082        | BV   | 0.0886      | 117.61160    | 20.00121     | 0.7003  |
| 8      | 10.249        | VB   | 0.0790      | 29.08188     | 4.84406      | 0.1732  |
| 9      | 10.829        | BB   | 0.0717      | 17.86604     | 3.67498      | 0.1064  |
| 10     | 11.045        | BB   | 0.0681      | 6.03111      | 1.08016      | 0.0359  |
| 11     | 11.235        | BB   | 0.0989      | 9.60299      | 1.17490      | 0.0572  |
| 12     | 11.357        | BV   | 0.0998      | 125.79803    | 19.11553     | 0.7491  |
| 13     | 11.484        | VV   | 0.0573      | 36.52851     | 7.92797      | 0.2175  |
| 14     | 11.699        | VV   | 0.1215      | 1.60226e4    | 2087.60083   | 95.4097 |
| 15     | 12.084        | VV   | 0.0322      | 28.99114     | 11.18867     | 0.1726  |
| 16     | 12.178        | VV   | 0.0750      | 91.37415     | 16.79968     | 0.5441  |
| 17     | 12.282        | VB   | 0.1138      | 233.03242    | 28.66618     | 1.3876  |

Totals : 1.67935e4 2213.55241

=====  
\*\*\* End of Report \*\*\*

```

=====
Acq. Operator   : SYSTEM                      Seq. Line :    2
Acq. Instrument : HPLC-Solaja                 Location  : Vial 34
Injection Date  : 2/21/2014 5:11:54 PM      Inj       :    1
                                                Inj Volume: 5.000 µl
Method          : C:\CHEM32\1\DATA\HINOLINSKI\HINOLINSKI 6 2014-02-21 16-44-21\METODA 7.M (
                : Sequence Method)
Last changed    : 2/21/2014 4:44:22 PM by SYSTEM
  
```

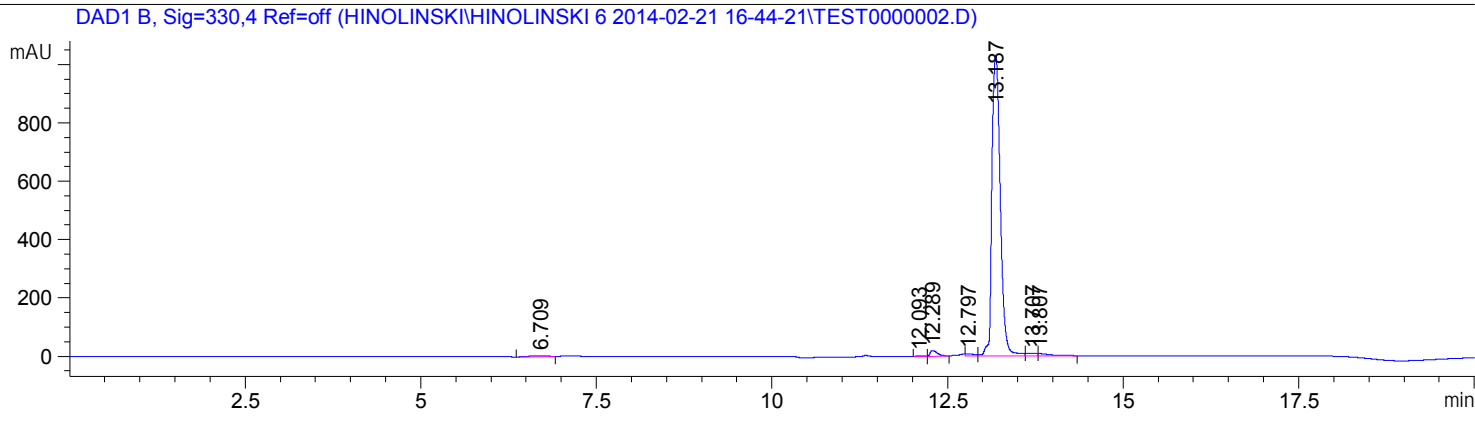

=====  
 Fraction Information  
 =====

No Fractions found.

=====  
 Area Percent Report  
 =====

Sorted By : Signal  
 Multiplier : 1.0000  
 Dilution : 1.0000  
 Use Multiplier & Dilution Factor with ISTDs  
 Signal 2: DAD1 B, Sig=330,4 Ref=off

| Peak # | RetTime [min] | Type | Width [min] | Area [mAU*s] | Height [mAU] | Area %  |
|--------|---------------|------|-------------|--------------|--------------|---------|
| 1      | 6.709         | BV   | 0.2344      | 86.05817     | 4.32957      | 0.9602  |
| 2      | 12.093        | BB   | 0.0762      | 10.51504     | 1.72388      | 0.1173  |
| 3      | 12.289        | BB   | 0.1046      | 128.86201    | 18.88998     | 1.4378  |
| 4      | 12.797        | VV   | 0.1066      | 58.68514     | 7.01316      | 0.6548  |
| 5      | 13.187        | VV   | 0.1327      | 8516.03027   | 1027.66528   | 95.0174 |
| 6      | 13.707        | VV   | 0.1197      | 83.13605     | 8.24247      | 0.9276  |
| 7      | 13.807        | VB   | 0.1299      | 79.31776     | 7.23449      | 0.8850  |

Totals : 8962.60445 1075.09886

=====  
 \*\*\* End of Report \*\*\*



=====  
Acq. Operator : SYSTEM  
Acq. Instrument : HPLC-Solaja Location : Vial 23  
Injection Date : 2/20/2014 10:52:04 AM Inj Volume : 7.500 µl  
Acq. Method : C:\CHEM32\1\METHODS\METODA 7.M  
Last changed : 2/20/2014 10:40:45 AM by SYSTEM  
(modified after loading)  
Analysis Method : C:\CHEM32\1\METHODS\METODA 7.M  
Last changed : 2/19/2014 3:10:21 PM by SYSTEM

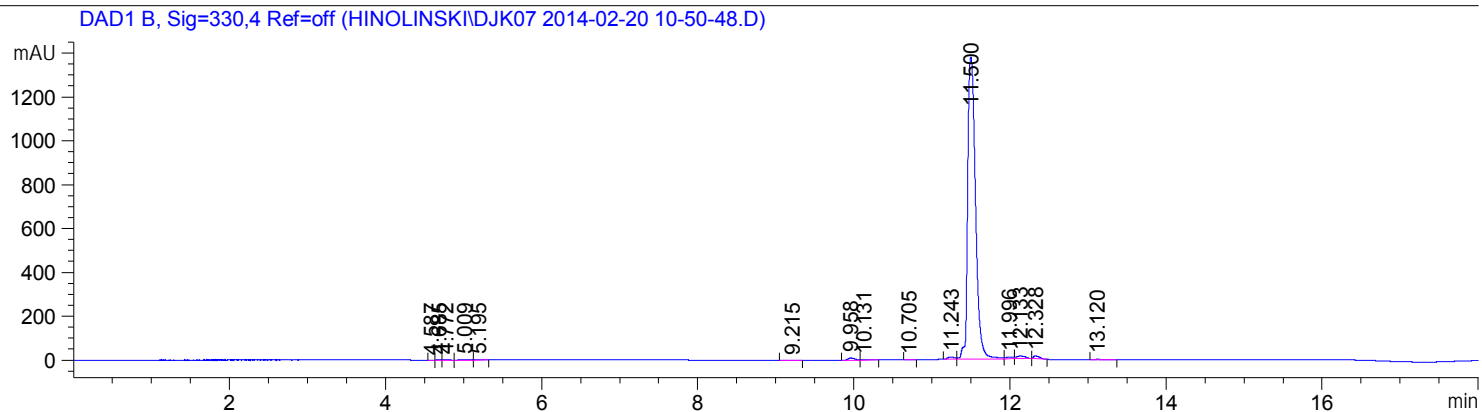

=====  
Fraction Information  
=====

No Fractions found.  
=====

=====  
Area Percent Report  
=====

Sorted By : Signal  
Multiplier : 1.0000  
Dilution : 1.0000  
Use Multiplier & Dilution Factor with ISTDs

Signal 2: DAD1 B, Sig=330,4 Ref=off

| Peak # | RetTime [min] | Type | Width [min] | Area [mAU*s] | Height [mAU] | Area %  |
|--------|---------------|------|-------------|--------------|--------------|---------|
| 1      | 4.587         | VV   | 0.0565      | 5.81544      | 1.26840      | 0.0579  |
| 2      | 4.685         | VV   | 0.0570      | 10.07004     | 2.35113      | 0.1003  |
| 3      | 4.772         | VB   | 0.0755      | 13.99395     | 2.28411      | 0.1394  |
| 4      | 5.009         | BV   | 0.0940      | 18.05120     | 2.28976      | 0.1798  |
| 5      | 5.195         | VB   | 0.0733      | 6.31388      | 1.07773      | 0.0629  |
| 6      | 9.215         | BB   | 0.0933      | 8.41399      | 1.06941      | 0.0838  |
| 7      | 9.958         | BV   | 0.0852      | 60.36195     | 10.32249     | 0.6011  |
| 8      | 10.131        | VB   | 0.0784      | 19.00268     | 3.04076      | 0.1892  |
| 9      | 10.705        | BB   | 0.0549      | 7.22036      | 1.57765      | 0.0719  |
| 10     | 11.243        | BV   | 0.0928      | 65.36218     | 10.68954     | 0.6509  |
| 11     | 11.500        | VV   | 0.1098      | 9598.78711   | 1377.40308   | 95.5881 |
| 12     | 11.996        | VV   | 0.0862      | 52.47046     | 7.92991      | 0.5225  |
| 13     | 12.133        | VB   | 0.1115      | 97.59934     | 12.04516     | 0.9719  |
| 14     | 12.328        | BB   | 0.0739      | 68.86954     | 13.51773     | 0.6858  |
| 15     | 13.120        | VB   | 0.0855      | 9.48490      | 1.32480      | 0.0945  |

Totals : 1.00418e4 1448.19166

=====  
\*\*\* End of Report \*\*\*

Sample Name: D0186

## Compound 20 Method C

```

=====
Acq. Operator   : SYSTEM                      Seq. Line :    2
Acq. Instrument : HPLC-Solaja                 Location  : Vial 32
Injection Date  : 2/21/2014 4:12:30 PM      Inj       :    1
                                                Inj Volume: 2.000 µl
Method          : C:\CHEM32\1\DATA\HINOLINSKI\HINOLINSKI 5 2014-02-21 15-47-00\METODA 7.M (
                : Sequence Method)
Last changed    : 2/21/2014 3:47:00 PM by SYSTEM
=====

```

DAD1 B, Sig=330,4 Ref=off (HINOLINSKI\HINOLINSKI 5 2014-02-21 15-47-00\TEST000002.D)

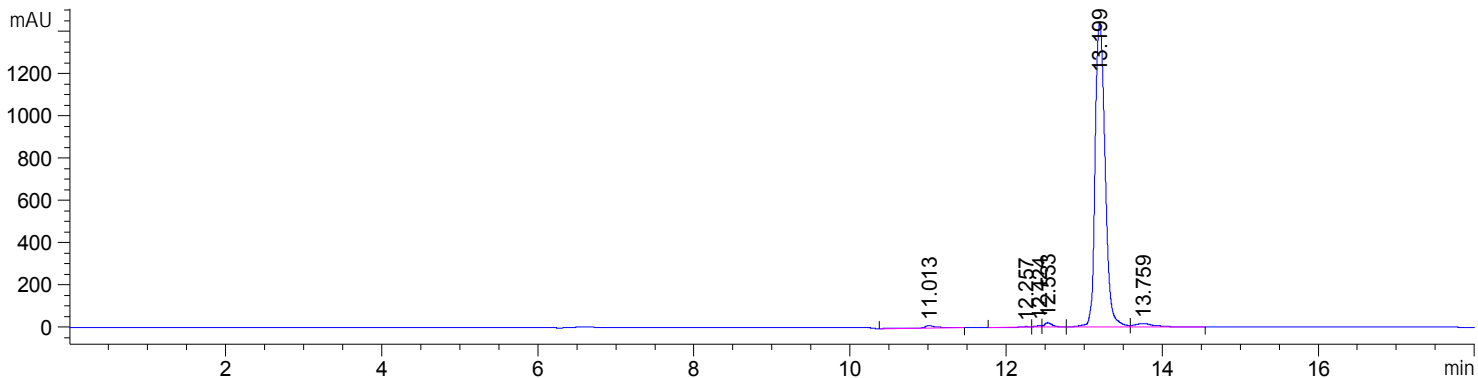

```

=====
Fraction Information
=====

```

```

=====
No Fractions found.
=====

```

```

=====
Area Percent Report
=====

```

```

Sorted By      :      Signal
Multiplier     :      1.0000
Dilution       :      1.0000
Use Multiplier & Dilution Factor with ISTDs

```

Signal 2: DAD1 B, Sig=330,4 Ref=off

| Peak # | RetTime [min] | Type | Width [min] | Area [mAU*s] | Height [mAU] | Area %  |
|--------|---------------|------|-------------|--------------|--------------|---------|
| 1      | 11.013        | BB   | 0.1744      | 166.23553    | 12.12893     | 1.2392  |
| 2      | 12.257        | BV   | 0.1204      | 30.58098     | 3.05293      | 0.2280  |
| 3      | 12.424        | VV   | 0.0728      | 34.70166     | 5.97099      | 0.2587  |
| 4      | 12.533        | VB   | 0.1054      | 135.93785    | 20.10739     | 1.0133  |
| 5      | 13.199        | BV   | 0.1423      | 1.27679e4    | 1434.42065   | 95.1766 |
| 6      | 13.759        | VB   | 0.2141      | 279.60245    | 15.94336     | 2.0843  |

```
Totals :                1.34150e4  1491.62425
```

```

=====
*** End of Report ***

```

```
=====
Acq. Operator   : SYSTEM
Acq. Instrument : HPLC-Solaja           Location : Vial 41
Injection Date  : 2/19/2014 9:47:39 AM
                                           Inj Volume : 5.000 µl
Acq. Method    : C:\CHEM32\1\METHODS\METODA 7.M
Last changed   : 2/19/2014 9:23:40 AM by SYSTEM
                 (modified after loading)
Analysis Method : C:\CHEM32\1\METHODS\PRANJE.M
Last changed   : 9/18/2013 2:53:53 PM by SYSTEM
=====
```

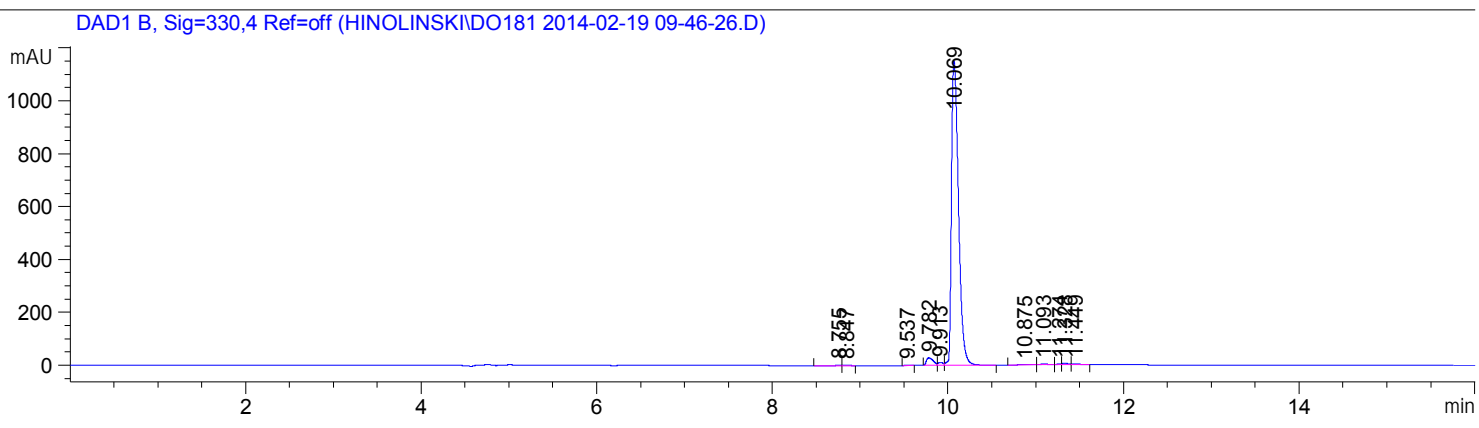

```
=====
Fraction Information
=====
```

No Fractions found.

```
=====
Area Percent Report
=====
```

```
Sorted By      :      Signal
Multiplier     :      1.0000
Dilution      :      1.0000
Use Multiplier & Dilution Factor with ISTDs
```

Signal 2: DAD1 B, Sig=330,4 Ref=off

| Peak # | RetTime [min] | Type | Width [min] | Area [mAU*s] | Height [mAU] | Area %  |
|--------|---------------|------|-------------|--------------|--------------|---------|
| 1      | 8.755         | BV   | 0.0843      | 14.75049     | 2.19836      | 0.2204  |
| 2      | 8.847         | VV   | 0.0769      | 20.37475     | 3.47413      | 0.3045  |
| 3      | 9.537         | BB   | 0.0551      | 6.45124      | 1.40293      | 0.0964  |
| 4      | 9.782         | BV   | 0.0844      | 145.50365    | 27.66089     | 2.1743  |
| 5      | 9.913         | VV   | 0.0616      | 38.97849     | 9.16115      | 0.5825  |
| 6      | 10.069        | VB   | 0.0866      | 6363.96094   | 1149.05420   | 95.0962 |
| 7      | 10.875        | BV   | 0.1022      | 18.90684     | 2.29344      | 0.2825  |
| 8      | 11.093        | VB   | 0.0766      | 20.12285     | 3.34847      | 0.3007  |
| 9      | 11.274        | BV   | 0.0460      | 12.53524     | 4.30000      | 0.1873  |
| 10     | 11.328        | VV   | 0.0701      | 28.63871     | 5.56271      | 0.4279  |
| 11     | 11.449        | VB   | 0.0730      | 21.90523     | 3.65288      | 0.3273  |

Totals : 6692.12843 1212.10918

=====  
\*\*\* End of Report \*\*\*

=====  
Acq. Operator : SYSTEM  
Acq. Instrument : HPLC-Solaja Location : Vial 8  
Injection Date : 2/21/2014 11:08:40 AM Inj Volume : 5.000 µl  
Acq. Method : C:\CHEM32\1\METHODS\METODA 7.M  
Last changed : 2/21/2014 11:07:18 AM by SYSTEM  
(modified after loading)  
Analysis Method : C:\CHEM32\1\METHODS\METODA 7.M  
Last changed : 2/20/2014 2:58:40 PM by SYSTEM

DAD1 B, Sig=330,4 Ref=off (HINOLINSKI\DR09 2014-02-21 11-07-25.D)

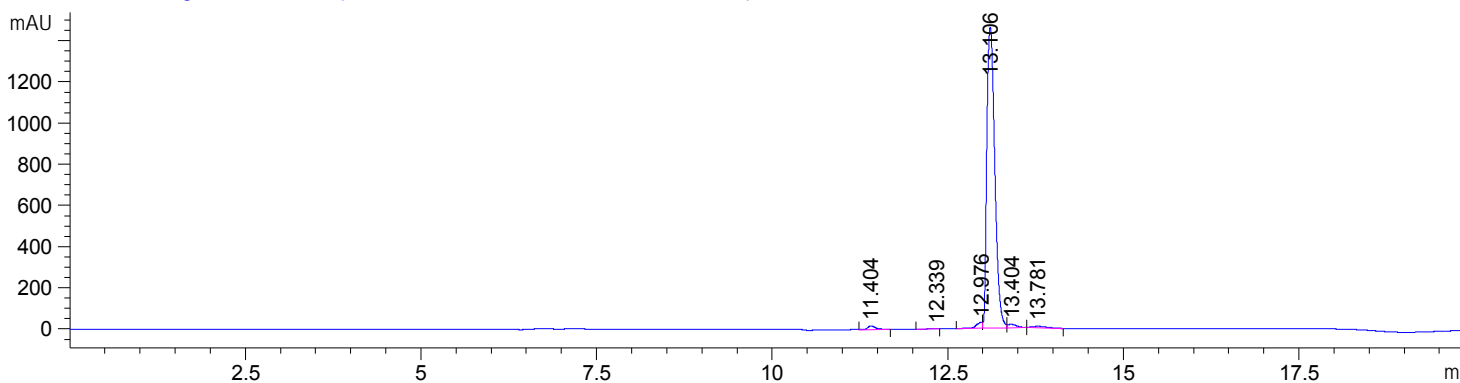

=====  
Fraction Information  
=====

No Fractions found.  
=====

=====  
Area Percent Report  
=====

Sorted By : Signal  
Multiplier : 1.0000  
Dilution : 1.0000  
Use Multiplier & Dilution Factor with ISTDs

Signal 2: DAD1 B, Sig=330,4 Ref=off

| Peak # | RetTime [min] | Type | Width [min] | Area [mAU*s] | Height [mAU] | Area %  |
|--------|---------------|------|-------------|--------------|--------------|---------|
| 1      | 11.404        | VB   | 0.1187      | 147.29094    | 17.85912     | 1.2157  |
| 2      | 12.339        | BV   | 0.1197      | 13.35825     | 1.34118      | 0.1103  |
| 3      | 12.976        | BV   | 0.0856      | 179.39629    | 28.23582     | 1.4807  |
| 4      | 13.106        | VV   | 0.1261      | 1.15281e4    | 1460.27515   | 95.1511 |
| 5      | 13.404        | VB   | 0.1080      | 145.85057    | 16.12716     | 1.2038  |
| 6      | 13.781        | BB   | 0.1663      | 101.57732    | 7.25804      | 0.8384  |

Totals : 1.21156e4 1531.09648

=====  
\*\*\* End of Report \*\*\*

```

=====
Acq. Operator   : SYSTEM                               Seq. Line :    3
Acq. Instrument : HPLC-Solaja                          Location  : Vial 56
Injection Date  : 2/25/2014 11:10:31 PM              Inj       :    1
                                                    Inj Volume: 5.000 µl
Method          : C:\CHEM32\1\DATA\HINOLINSKI\HINOLINSKI 9 2014-02-25 22-16-36\METODA 24.M (
                  Sequence Method)
Last changed    : 2/25/2014 10:16:36 PM by SYSTEM
  
```

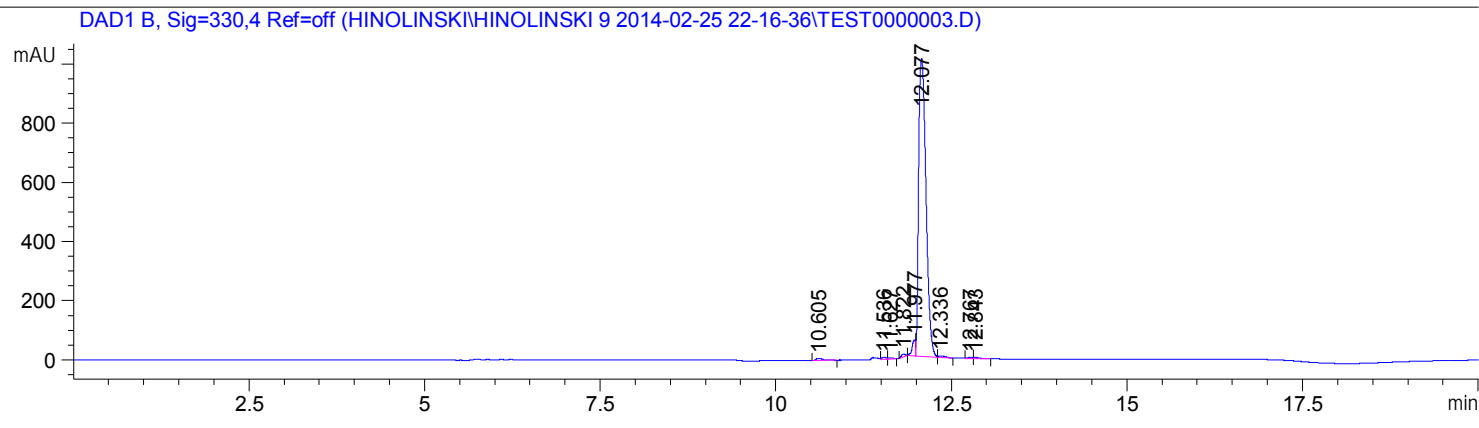

=====  
 Fraction Information  
 =====

No Fractions found.

=====  
 Area Percent Report  
 =====

```

Sorted By      :      Signal
Multiplier     :      1.0000
Dilution      :      1.0000
Use Multiplier & Dilution Factor with ISTDs
  
```

Signal 2: DAD1 B, Sig=330,4 Ref=off

| Peak # | RetTime [min] | Type | Width [min] | Area [mAU*s] | Height [mAU] | Area %  |
|--------|---------------|------|-------------|--------------|--------------|---------|
| 1      | 10.605        | BB   | 0.0891      | 45.47674     | 6.88395      | 0.5932  |
| 2      | 11.536        | VV   | 0.0668      | 29.65431     | 6.04188      | 0.3868  |
| 3      | 11.627        | VB   | 0.0629      | 16.13100     | 3.49195      | 0.2104  |
| 4      | 11.822        | BB   | 0.0673      | 34.05287     | 8.48385      | 0.4442  |
| 5      | 11.977        | BV   | 0.0524      | 176.41385    | 52.86920     | 2.3010  |
| 6      | 12.077        | VV   | 0.1161      | 7294.38867   | 1006.11627   | 95.1406 |
| 7      | 12.336        | VB   | 0.0988      | 33.36090     | 4.30850      | 0.4351  |
| 8      | 12.767        | VV   | 0.0660      | 17.46827     | 3.28944      | 0.2278  |
| 9      | 12.843        | VB   | 0.0731      | 20.00685     | 3.30386      | 0.2609  |

Totals :                                    7666.95346 1094.78890

=====  
 \*\*\* End of Report \*\*\*

Sample Name: DOJK08

Compound 25

Method C

```
=====
Acq. Operator   : SYSTEM                      Seq. Line :    6
Acq. Instrument : HPLC-Solaja                 Location  : Vial 62
Injection Date  : 2/26/2014 12:29:28 AM      Inj       :    1
                                                    Inj Volume: 5.000 µl
Method          : C:\CHEM32\1\DATA\HINOLINSKI\HINOLINSKI 9 2014-02-25 22-16-36\METHODA 24.M (
                : Sequence Method)
Last changed    : 2/25/2014 10:16:36 PM by SYSTEM
=====
```

DAD1 B, Sig=330,4 Ref=off (HINOLINSKI\HINOLINSKI 9 2014-02-25 22-16-36\TEST0000006.D)

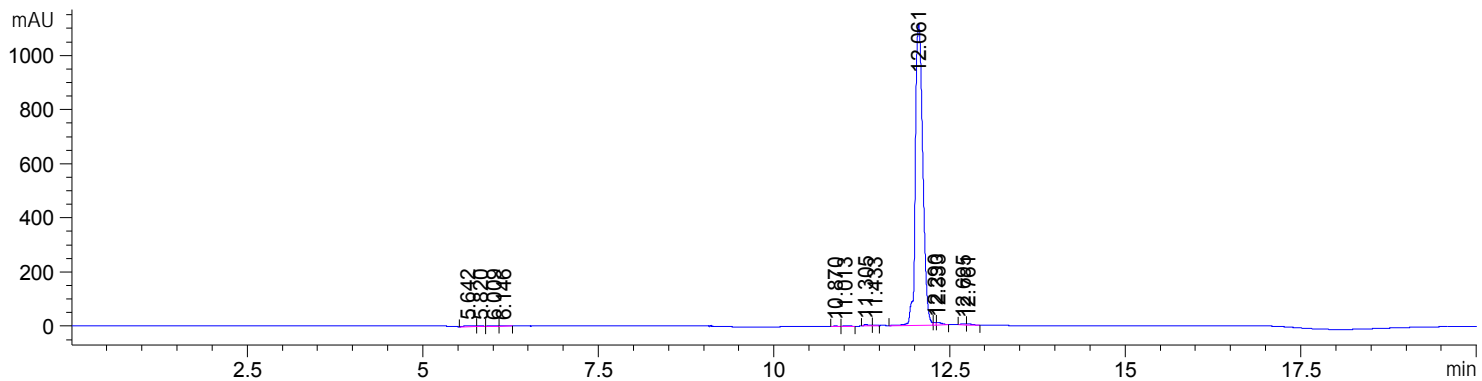

```
=====
Fraction Information
=====
```

```
No Fractions found.
=====
```

```
Area Percent Report
=====
```

```
Sorted By      :      Signal
Multiplier     :      1.0000
Dilution       :      1.0000
Use Multiplier & Dilution Factor with ISTDs
```



Signal 2: DAD1 B, Sig=330,4 Ref=off

| Peak # | RetTime [min] | Type | Width [min] | Area [mAU*s] | Height [mAU] | Area %  |
|--------|---------------|------|-------------|--------------|--------------|---------|
| 1      | 5.642         | BV   | 0.1278      | 36.26812     | 3.36398      | 0.4312  |
| 2      | 5.820         | VV   | 0.0748      | 17.15714     | 2.88639      | 0.2040  |
| 3      | 6.009         | VV   | 0.0977      | 18.80373     | 2.28020      | 0.2236  |
| 4      | 6.146         | VB   | 0.0826      | 10.56242     | 1.62935      | 0.1256  |
| 5      | 10.870        | BV   | 0.0627      | 6.37159      | 1.22561      | 0.0758  |
| 6      | 11.013        | VB   | 0.0773      | 8.66594      | 1.35110      | 0.1030  |
| 7      | 11.305        | BV   | 0.0777      | 25.77197     | 4.61158      | 0.3064  |
| 8      | 11.433        | VB   | 0.0484      | 6.06162      | 1.55901      | 0.0721  |
| 9      | 12.061        | BV   | 0.1168      | 8172.54492   | 1110.94275   | 97.1698 |
| 10     | 12.290        | VV   | 0.0395      | 25.65238     | 9.06508      | 0.3050  |
| 11     | 12.333        | VB   | 0.0672      | 44.77309     | 8.68314      | 0.5323  |
| 12     | 12.695        | VV   | 0.0728      | 18.50238     | 3.46563      | 0.2200  |
| 13     | 12.761        | VB   | 0.0638      | 19.44583     | 3.67121      | 0.2312  |

Totals : 8410.58114 1154.73502

=====  
\*\*\* End of Report \*\*\*

Sample Name: D0174

## Compound 36

## Method C

```
=====
Acq. Operator   : SYSTEM                      Seq. Line :    4
Acq. Instrument : HPLC-Solaja                 Location  : Vial 57
Injection Date  : 2/25/2014 11:36:51 PM      Inj       :    1
                                                Inj Volume: 5.000 µl
Method         : C:\CHEM32\1\DATA\HINOLINSKI\HINOLINSKI 9 2014-02-25 22-16-36\METODA 24.M (
                Sequence Method)
Last changed    : 2/25/2014 10:16:36 PM by SYSTEM
=====
```

DAD1 B, Sig=330,4 Ref=off (HINOLINSKI\HINOLINSKI 9 2014-02-25 22-16-36\TEST0000004.D)

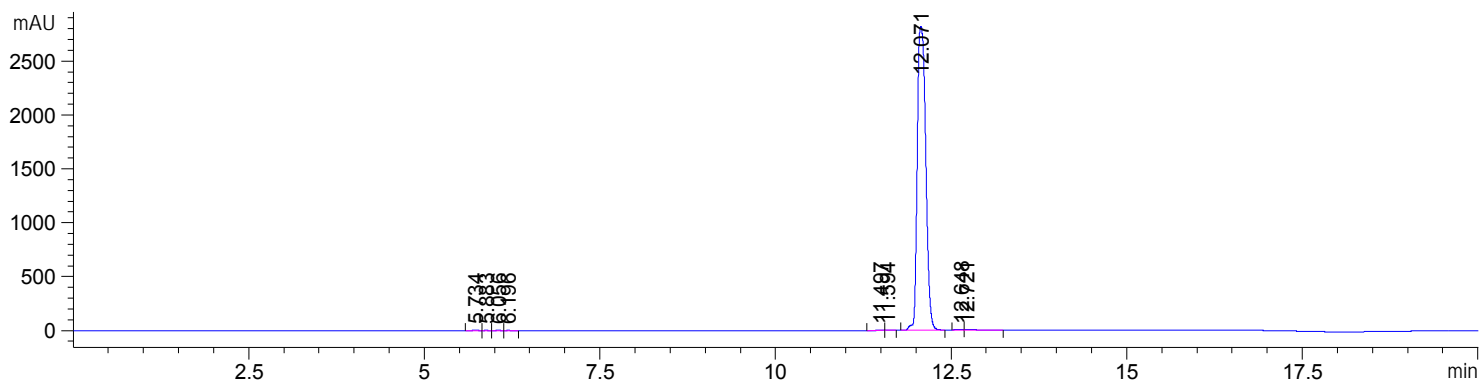

```
=====
Fraction Information
=====
```

```
No Fractions found.
=====
```

```
Area Percent Report
=====
```

```
Sorted By      : Signal
Multiplier     : 1.0000
Dilution      : 1.0000
Use Multiplier & Dilution Factor with ISTDs
```

Signal 2: DAD1 B, Si g=330, 4 Ref=off

| Peak # | RetTime [min] | Type | Width [min] | Area [mAU*s] | Height [mAU] | Area %  |
|--------|---------------|------|-------------|--------------|--------------|---------|
| 1      | 5.734         | BV   | 0.1247      | 34.74579     | 3.31755      | 0.1456  |
| 2      | 5.883         | VV   | 0.0804      | 18.31310     | 2.99248      | 0.0767  |
| 3      | 6.056         | VV   | 0.0919      | 18.64886     | 2.44772      | 0.0782  |
| 4      | 6.196         | VB   | 0.0860      | 11.68477     | 1.71578      | 0.0490  |
| 5      | 11.497        | BV   | 0.0852      | 13.33289     | 2.02765      | 0.0559  |
| 6      | 11.594        | VB   | 0.0664      | 7.07617      | 1.34354      | 0.0297  |
| 7      | 12.071        | BV   | 0.1012      | 2.36822e4    | 2813.83350   | 99.2431 |
| 8      | 12.648        | BV   | 0.0889      | 30.85190     | 4.19247      | 0.1293  |
| 9      | 12.721        | VB   | 0.1278      | 45.96009     | 4.45875      | 0.1926  |

Totals : 2.38628e4 2836.32944

=====  
\*\*\* End of Report \*\*\*

```

=====
Acq. Operator   : SYSTEM
Acq. Instrument : HPLC-Solaja           Location : Vial 11
Injection Date  : 2/21/2014 1:02:35 PM
                                           Inj Volume : 5.000 µl

Acq. Method    : C:\CHEM32\1\METHODS\METODA 7.M
Last changed   : 2/21/2014 12:38:38 PM by SYSTEM
                 (modified after loading)

Analysis Method : C:\CHEM32\1\METHODS\METODA 7.M
Last changed   : 2/20/2014 2:58:40 PM by SYSTEM
  
```

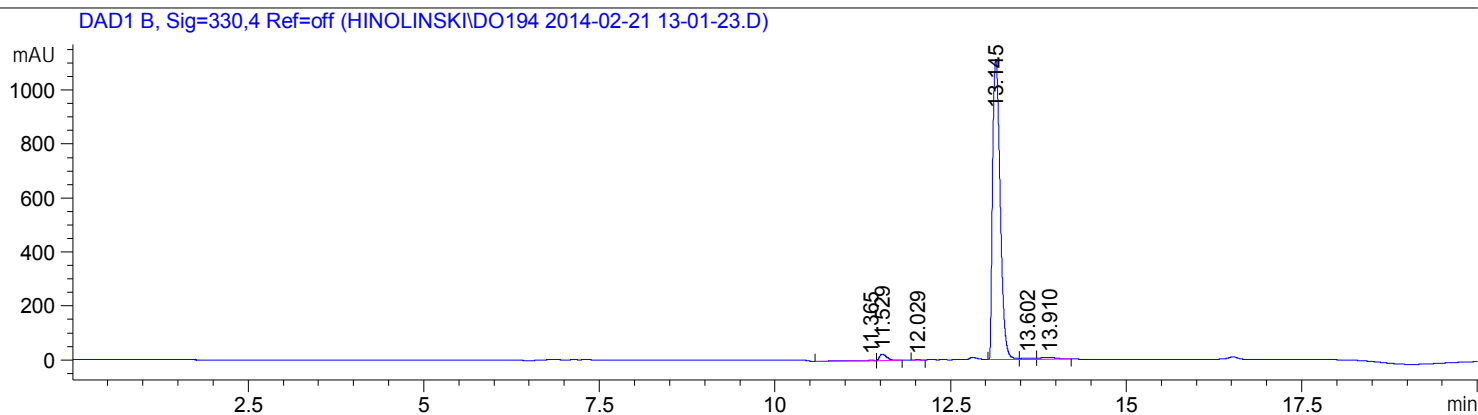

=====  
 Fraction Information  
 =====

No Fractions found.

=====  
 Area Percent Report  
 =====

```

Sorted By       : Signal
Multiplier      : 1.0000
Dilution        : 1.0000
Use Multiplier & Dilution Factor with ISTDs
  
```

Signal 2: DAD1 B, Sig=330,4 Ref=off

| Peak # | RetTime [min] | Type | Width [min] | Area [mAU*s] | Height [mAU] | Area %  |
|--------|---------------|------|-------------|--------------|--------------|---------|
| 1      | 11.365        | BV   | 0.4126      | 66.33316     | 1.88258      | 0.7592  |
| 2      | 11.529        | VB   | 0.1153      | 174.55154    | 23.47076     | 1.9979  |
| 3      | 12.029        | BV   | 0.0710      | 12.85775     | 2.20732      | 0.1472  |
| 4      | 13.145        | BV   | 0.1209      | 8320.55859   | 1111.08850   | 95.2343 |
| 5      | 13.602        | VV   | 0.1422      | 54.91820     | 4.55336      | 0.6286  |
| 6      | 13.910        | VB   | 0.1828      | 107.71581    | 6.92975      | 1.2329  |

Totals :                                      8736.93505 1150.13227

=====  
 \*\*\* End of Report \*\*\*

```
=====
Acq. Operator   : SYSTEM
Acq. Instrument : HPLC-Solaja                    Location : Vial 83
Injection Date  : 2/26/2014 7:31:34 PM
                                                 Inj Volume : 2.000 µl

Acq. Method     : C:\CHEM32\1\METHODS\METODA 7.M
Last changed    : 2/26/2014 7:30:08 PM by SYSTEM
                                                 (modified after loading)

Analysis Method : C:\CHEM32\1\METHODS\PRANJE.M
Last changed    : 9/18/2013 2:53:53 PM by SYSTEM
=====
```

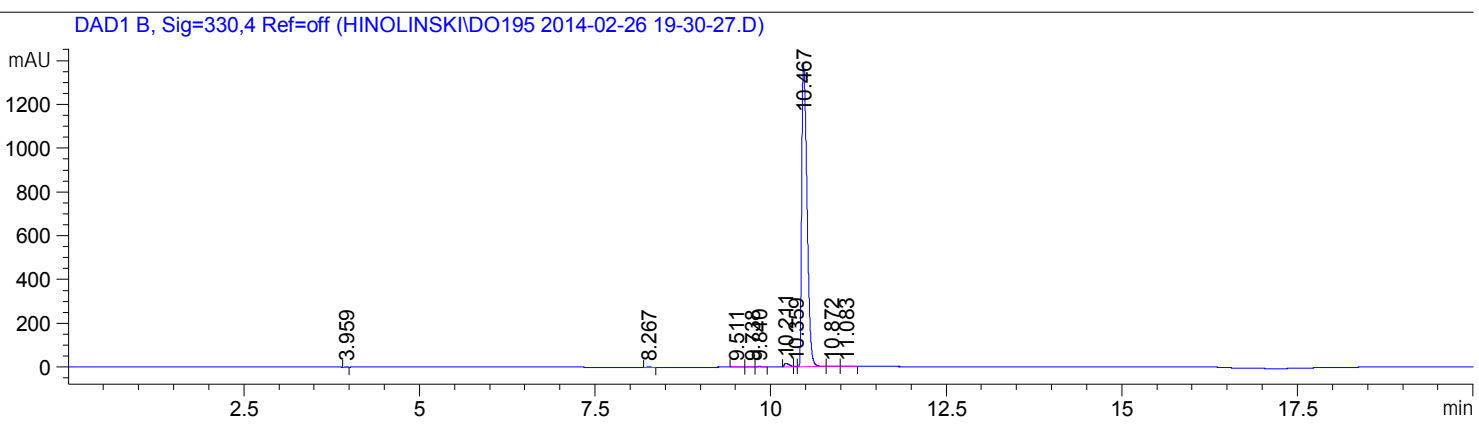

=====  
Fraction Information  
=====

No Fractions found.  
=====

=====  
Area Percent Report  
=====

Sorted By            :        Signal  
Multiplier          :        1.0000  
Dilution             :        1.0000  
Use Multiplier & Dilution Factor with ISTDs

Signal 2: DAD1 B, Sig=330,4 Ref=off

| Peak # | RetTime [min] | Type | Width [min] | Area [mAU*s] | Height [mAU] | Area %  |
|--------|---------------|------|-------------|--------------|--------------|---------|
| 1      | 3.959         | BB   | 0.0469      | 6.22457      | 2.17706      | 0.0841  |
| 2      | 8.267         | BB   | 0.0549      | 5.25604      | 1.15871      | 0.0710  |
| 3      | 9.511         | BV   | 0.0824      | 9.35642      | 1.36666      | 0.1264  |
| 4      | 9.738         | VV   | 0.0776      | 8.47712      | 1.40132      | 0.1145  |
| 5      | 9.840         | VB   | 0.0681      | 9.86576      | 1.86846      | 0.1333  |
| 6      | 10.211        | VV   | 0.0689      | 77.25272     | 15.55775     | 1.0438  |
| 7      | 10.359        | VV   | 0.0350      | 5.75576      | 2.31383      | 0.0778  |
| 8      | 10.467        | VB   | 0.0842      | 7261.27490   | 1384.18518   | 98.1114 |
| 9      | 10.872        | BV   | 0.0778      | 7.18719      | 1.09850      | 0.0971  |
| 10     | 11.083        | VB   | 0.0744      | 10.40300     | 1.68820      | 0.1406  |

Totals : 7401.05349 1412.81568

=====  
\*\*\* End of Report \*\*\*

Sample Name: D0191 **Compound 41**

**Method C**

```

=====
Acq. Operator   : SYSTEM                      Seq. Line :    2
Acq. Instrument : HPLC-Solaja                 Location  : Vial 72
Injection Date  : 2/24/2014 8:40:01 PM      Inj       :    1
                                           Inj Volume: 2.000 µl

Acq. Method     : C:\CHEM32\1\DATA\HINOLINSKI\HINOLINSKI 8 2014-02-24 20-12-39\METODA 8.M
Last changed    : 2/24/2014 8:34:12 PM by SYSTEM
Analysis Method : C:\CHEM32\1\DATA\HINOLINSKI\HINOLINSKI 8 2014-02-24 20-12-39\METODA 8.M (
                  Sequence Method)
Last changed    : 2/24/2014 8:12:39 PM by SYSTEM
Method Info     : BENZOTIAZOLI
    
```

DAD1 B, Sig=330,4 Ref=off (HINOLINSKI\HINOLINSKI 8 2014-02-24 20-12-39\TEST000002.D)

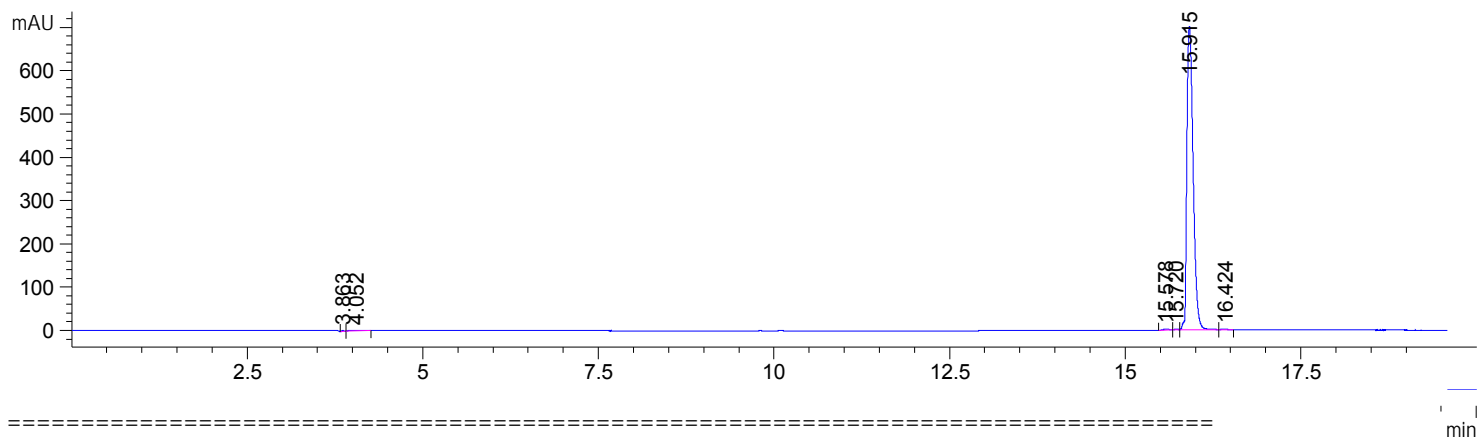

Fraction Information

No Fractions found.

Area Percent Report

```

Sorted By      :      Signal
Multiplier     :      1.0000
Dilution       :      1.0000
Use Multiplier & Dilution Factor with ISTDs
    
```

Signal 2: DAD1 B, Sig=330,4 Ref=off

| Peak # | RetTime [min] | Type | Width [min] | Area [mAU*s] | Height [mAU] | Area %  |
|--------|---------------|------|-------------|--------------|--------------|---------|
| 1      | 3.863         | BV   | 0.0390      | 5.16061      | 1.79463      | 0.1172  |
| 2      | 4.052         | VB   | 0.1515      | 25.32899     | 1.98973      | 0.5754  |
| 3      | 15.578        | BV   | 0.0753      | 14.38167     | 2.58968      | 0.3267  |
| 4      | 15.720        | VV   | 0.0629      | 8.63869      | 1.81897      | 0.1962  |
| 5      | 15.915        | VV   | 0.0982      | 4340.81494   | 701.01807    | 98.6065 |
| 6      | 16.424        | VB   | 0.0900      | 7.83396      | 1.05020      | 0.1780  |

Totals : 4402.15886 710.26128

\*\*\* End of Report \*\*\*

```

=====
Acq. Operator   : SYSTEM
Acq. Instrument : HPLC-Solaja                      Location  : Vial 77
Injection Date  : 2/27/2014 6:28:38 PM
                                           Inj Volume: 2.000 µl

Acq. Method     : C:\CHEM32\1\METHODS\METODA 24.M
Last changed    : 2/27/2014 6:25:04 PM by SYSTEM
                  (modified after loading)

Analysis Method : C:\CHEM32\1\METHODS\PRANJE.M
Last changed    : 9/18/2013 2:53:53 PM by SYSTEM
  
```

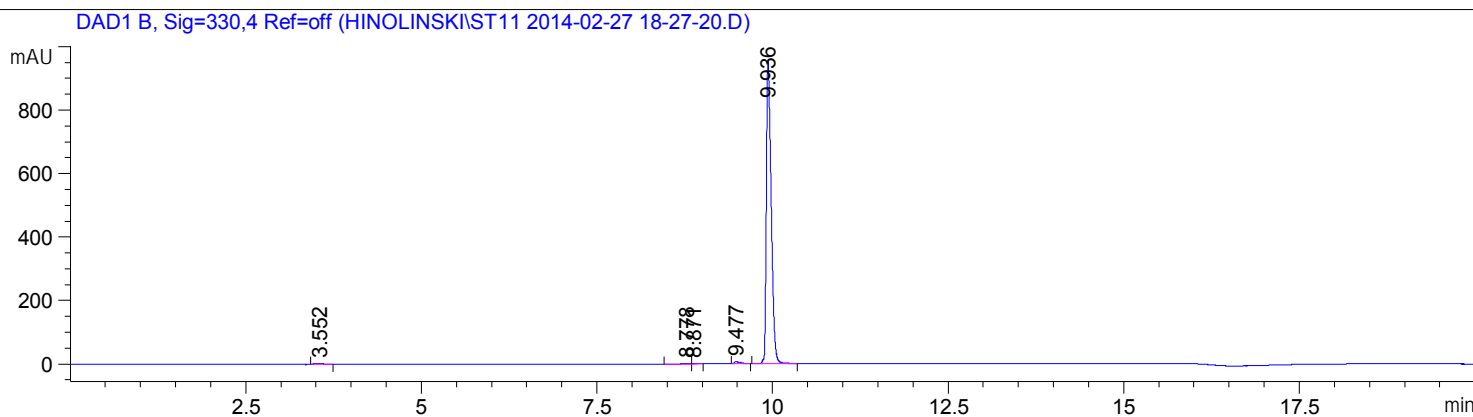

=====  
 Fraction Information  
 =====

No Fractions found.

=====  
 Area Percent Report  
 =====

```

Sorted By      :      Signal
Multiplier     :      1.0000
Dilution       :      1.0000
Use Multiplier & Dilution Factor with ISTDs
  
```

Signal 2: DAD1 B, Sig=330,4 Ref=off

| Peak # | RetTime [min] | Type | Width [min] | Area [mAU*s] | Height [mAU] | Area %  |
|--------|---------------|------|-------------|--------------|--------------|---------|
| 1      | 3.552         | VB   | 0.1360      | 21.57221     | 1.88557      | 0.4633  |
| 2      | 8.778         | BV   | 0.1134      | 17.16291     | 1.80479      | 0.3686  |
| 3      | 8.871         | VB   | 0.0537      | 5.04941      | 1.16190      | 0.1085  |
| 4      | 9.477         | BB   | 0.0811      | 39.85469     | 6.67863      | 0.8560  |
| 5      | 9.936         | BB   | 0.0760      | 4572.14014   | 952.83606    | 98.2035 |

Totals :                      4655.77936    964.36694

=====  
 \*\*\* End of Report \*\*\*



=====  
Acq. Operator : SYSTEM  
Acq. Instrument : HPLC-Solaja Location : Vial 71  
Injection Date : 2/27/2014 2:55:59 PM Inj Volume : 5.000 µl  
Acq. Method : C:\CHEM32\1\METHODS\METODA 24.M  
Last changed : 2/27/2014 2:39:03 PM by SYSTEM  
(modified after loading)  
Analysis Method : C:\CHEM32\1\METHODS\PRANJE.M  
Last changed : 9/18/2013 2:53:53 PM by SYSTEM

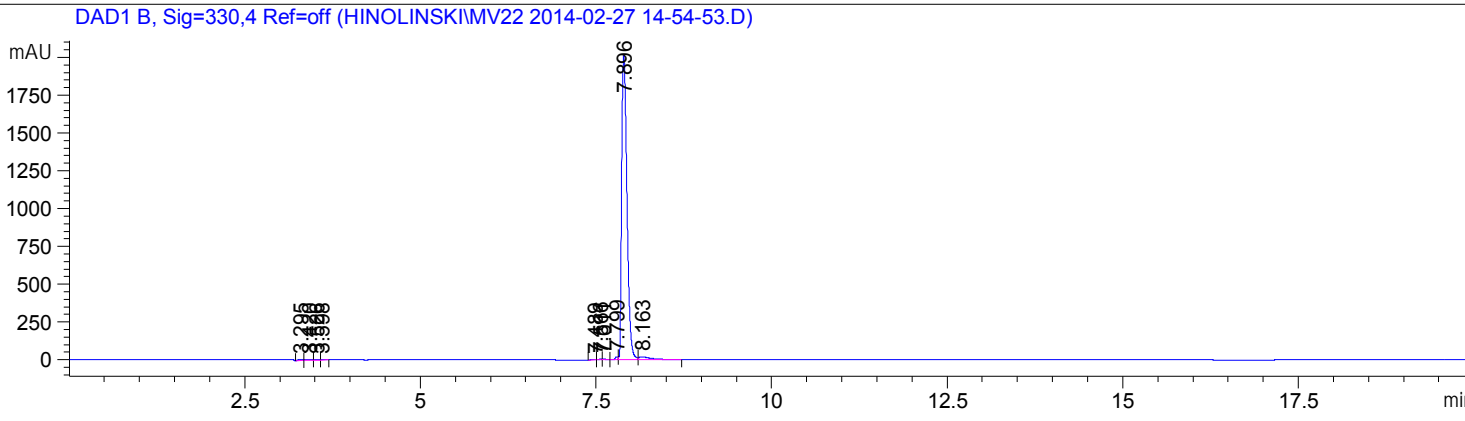

=====  
Fraction Information  
=====

No Fractions found.  
=====

=====  
Area Percent Report  
=====

Sorted By : Signal  
Multiplier : 1.0000  
Dilution : 1.0000  
Use Multiplier & Dilution Factor with ISTDs

Signal 2: DAD1 B, Sig=330,4 Ref=off

| Peak # | RetTime [min] | Type | Width [min] | Area [mAU*s] | Height [mAU] | Area %  |
|--------|---------------|------|-------------|--------------|--------------|---------|
| 1      | 3.295         | BV   | 0.0700      | 29.83358     | 5.94979      | 0.2733  |
| 2      | 3.420         | VV   | 0.0820      | 38.07766     | 5.55012      | 0.3488  |
| 3      | 3.526         | VV   | 0.0681      | 21.82052     | 3.97027      | 0.1999  |
| 4      | 3.598         | VB   | 0.0514      | 10.97804     | 2.56818      | 0.1006  |
| 5      | 7.489         | BV   | 0.0448      | 7.40382      | 2.35009      | 0.0678  |
| 6      | 7.566         | VV   | 0.0491      | 13.15521     | 3.87252      | 0.1205  |
| 7      | 7.611         | VB   | 0.0540      | 13.90615     | 3.49097      | 0.1274  |
| 8      | 7.799         | BV   | 0.0436      | 46.89835     | 16.77225     | 0.4296  |
| 9      | 7.896         | VV   | 0.0826      | 1.05308e4    | 2010.04443   | 96.4580 |
| 10     | 8.163         | VB   | 0.1538      | 204.62837    | 17.77680     | 1.8743  |

Totals : 1.09175e4 2072.34543

=====  
\*\*\* End of Report \*\*\*

```

=====
Acq. Operator   : SYSTEM
Acq. Instrument : HPLC-Solaja           Location : Vial 7
Injection Date  : 2/21/2014 10:43:28 AM
                                           Inj Volume : 1.500 µl

Acq. Method     : C:\CHEM32\1\METHODS\METODA 7.M
Last changed    : 2/21/2014 10:54:24 AM by SYSTEM
                  (modified after loading)

Analysis Method : C:\CHEM32\1\METHODS\METODA 7.M
Last changed    : 2/20/2014 2:58:40 PM by SYSTEM
  
```

DAD1 B, Sig=330,4 Ref=off (HINOLINSKI\MV61 2014-02-21 10-42-11.D)

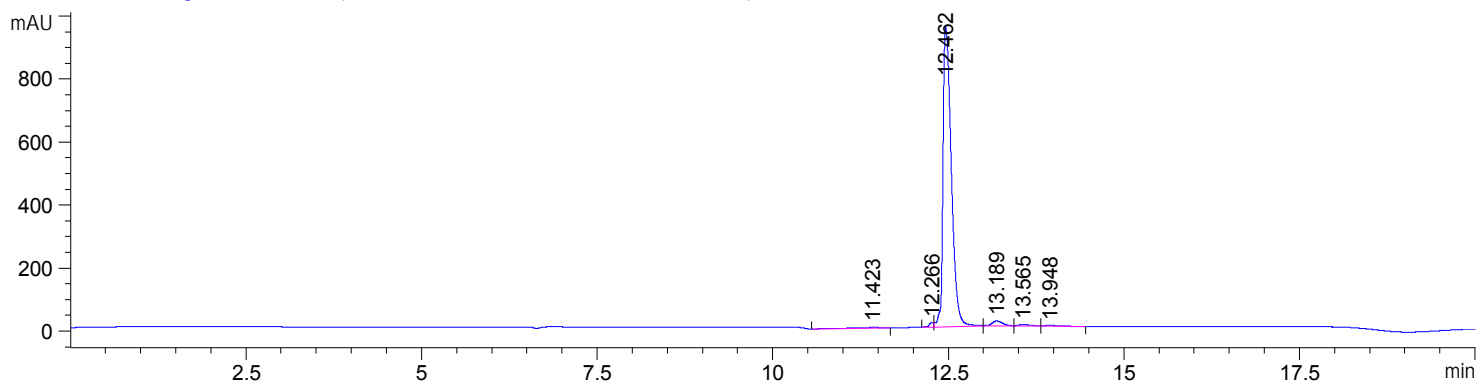

=====  
 Fraction Information  
 =====

No Fractions found.  
 =====

=====  
 Area Percent Report  
 =====

Sorted By : Signal  
 Multiplier : 1.0000  
 Dilution : 1.0000  
 Use Multiplier & Dilution Factor with ISTDs

Signal 2: DAD1 B, Sig=330,4 Ref=off

| Peak # | RetTime [min] | Type | Width [min] | Area [mAU*s] | Height [mAU] | Area %  |
|--------|---------------|------|-------------|--------------|--------------|---------|
| 1      | 11.423        | BB   | 0.3545      | 80.20527     | 2.68111      | 0.9768  |
| 2      | 12.266        | BV   | 0.0686      | 60.87838     | 13.25480     | 0.7414  |
| 3      | 12.462        | VB   | 0.1281      | 7834.17725   | 950.83105    | 95.4108 |
| 4      | 13.189        | BV   | 0.1326      | 150.77586    | 15.01812     | 1.8363  |
| 5      | 13.565        | VV   | 0.1404      | 53.32525     | 4.54446      | 0.6494  |
| 6      | 13.948        | VB   | 0.1795      | 31.63280     | 2.07948      | 0.3852  |

Totals : 8210.99481 988.40904

=====  
 \*\*\* End of Report \*\*\*

```

=====
Acq. Operator   : SYSTEM                               Seq. Line :    1
Acq. Instrument : HPLC-Solaja                          Location  : Vial 54
Injection Date  : 2/25/2014 10:17:54 PM              Inj       :    1
                                                    Inj Volume: 5.000 µl
Method          : C:\CHEM32\1\DATA\HINOLINSKI\HINOLINSKI 9 2014-02-25 22-16-36\METODA 24.M (
                  Sequence Method)
Last changed    : 2/25/2014 10:16:36 PM by SYSTEM
=====
  
```

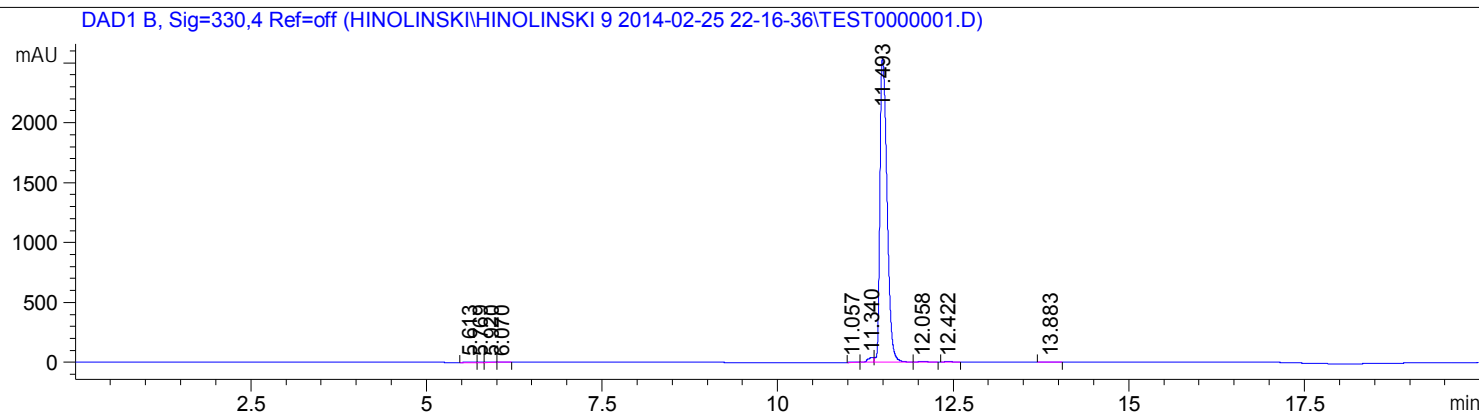

=====  
 Fraction Information  
 =====

No Fractions found.

=====  
 Area Percent Report  
 =====

```

Sorted By      :      Signal
Multiplier     :      1.0000
Dilution       :      1.0000
Use Multiplier & Dilution Factor with ISTDs
  
```

Signal 2: DAD1 B, Sig=330,4 Ref=off

| Peak # | RetTime [min] | Type | Width [min] | Area [mAU*s] | Height [mAU] | Area %  |
|--------|---------------|------|-------------|--------------|--------------|---------|
| 1      | 5.613         | BV   | 0.1217      | 24.77264     | 2.42405      | 0.1356  |
| 2      | 5.769         | VV   | 0.0628      | 8.54417      | 1.63935      | 0.0468  |
| 3      | 5.920         | VV   | 0.0901      | 12.88919     | 1.72560      | 0.0706  |
| 4      | 6.070         | VB   | 0.0762      | 7.49557      | 1.18722      | 0.0410  |
| 5      | 11.057        | BV   | 0.0866      | 16.42900     | 2.51783      | 0.0899  |
| 6      | 11.340        | VV   | 0.0815      | 238.29944    | 40.27359     | 1.3044  |
| 7      | 11.493        | VV   | 0.1109      | 1.78894e4    | 2532.88477   | 97.9245 |
| 8      | 12.058        | VB   | 0.1252      | 40.66521     | 3.84978      | 0.2226  |
| 9      | 12.422        | BB   | 0.0971      | 16.75681     | 2.08881      | 0.0917  |
| 10     | 13.883        | BB   | 0.0769      | 13.31058     | 2.17637      | 0.0729  |

Totals :                      1.82685e4 2590.76737

=====  
 \*\*\* End of Report \*\*\*

Sample Name: ST13 **Compound 54** **Method C**

```

=====
Acq. Operator   : SYSTEM                               Seq. Line :    2
Acq. Instrument : HPLC-Solaja                          Location  : Vial 55
Injection Date  : 2/25/2014 10:44:13 PM                Inj       :    1
                                                    Inj Volume: 5.000 µl
Method          : C:\CHEM32\1\DATA\HI NOLINSKI \HI NOLINSKI 9 2014-02-25 22-16-36\METODA 24.M (
                Sequence Method)
Last changed    : 2/25/2014 10:16:36 PM by SYSTEM
=====
    
```

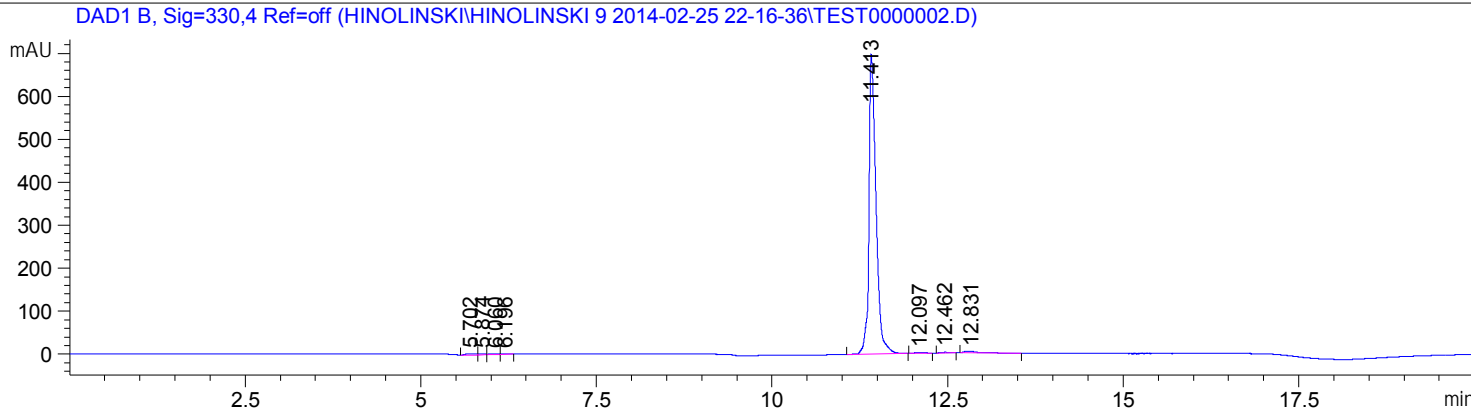

Fraction Information

No Fractions found.

Area Percent Report

```

Sorted By      :      Signal
Multiplier     :      1.0000
Dilution       :      1.0000
Use Multiplier & Dilution Factor with ISTDs
    
```

Signal 2: DAD1 B, Sig=330,4 Ref=off

| Peak # | RetTime [min] | Type | Width [min] | Area [mAU*s] | Height [mAU] | Area %  |
|--------|---------------|------|-------------|--------------|--------------|---------|
| 1      | 5.702         | BV   | 0.1296      | 36.57756     | 3.35749      | 0.7252  |
| 2      | 5.874         | VV   | 0.0715      | 18.11462     | 3.03915      | 0.3592  |
| 3      | 6.060         | VV   | 0.0989      | 19.11790     | 2.32680      | 0.3791  |
| 4      | 6.196         | VB   | 0.0833      | 11.05497     | 1.65761      | 0.2192  |
| 5      | 11.413        | BB   | 0.1077      | 4883.66016   | 697.03918    | 96.8300 |
| 6      | 12.097        | BB   | 0.0941      | 13.61810     | 1.71603      | 0.2700  |
| 7      | 12.462        | BB   | 0.0969      | 11.65178     | 1.43263      | 0.2310  |
| 8      | 12.831        | BB   | 0.1806      | 49.74744     | 3.30498      | 0.9864  |

Totals : 5043.54253 713.87387

\*\*\* End of Report \*\*\*

```

=====
Acq. Operator   : SYSTEM
Acq. Instrument : HPLC-Solaja                      Location  : Vial 72
Injection Date  : 2/27/2014 6:03:31 PM
                                                    Inj Volume: 1.500 µl

Acq. Method     : C:\CHEM32\1\METHODS\METODA 24.M
Last changed    : 2/27/2014 6:02:10 PM by SYSTEM
                  (modified after loading)

Analysis Method : C:\CHEM32\1\METHODS\PRANJE.M
Last changed    : 9/18/2013 2:53:53 PM by SYSTEM
  
```

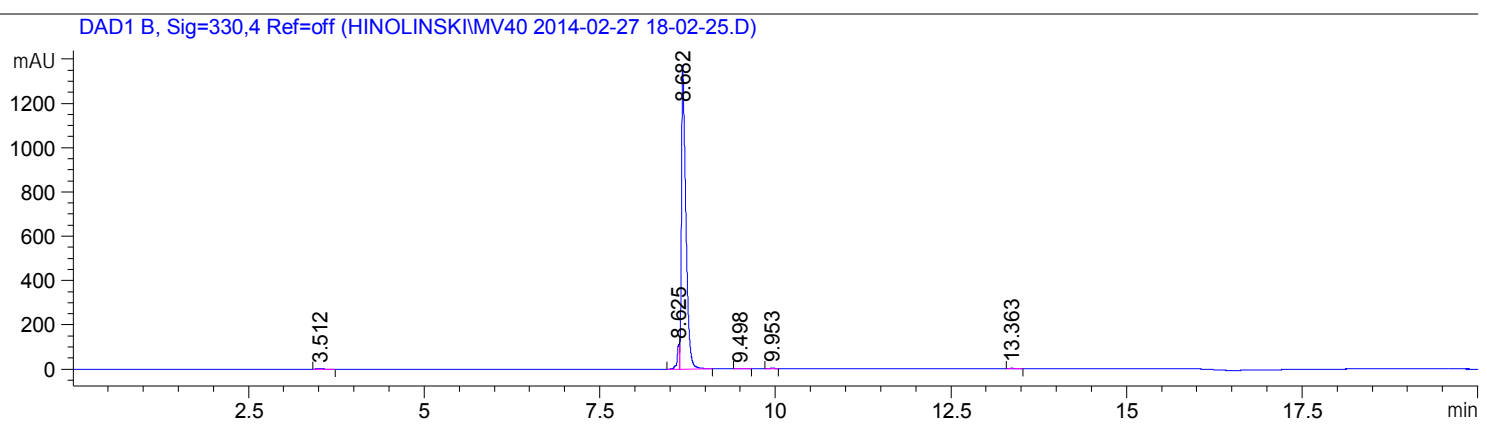

=====  
 Fraction Information  
 =====

No Fractions found.

=====  
 Area Percent Report  
 =====

Sorted By : Signal  
 Multiplier : 1.0000  
 Dilution : 1.0000  
 Use Multiplier & Dilution Factor with ISTDs

Signal 2: DAD1 B, Sig=330,4 Ref=off

| Peak # | RetTime [min] | Type | Width [min] | Area [mAU*s] | Height [mAU] | Area %  |
|--------|---------------|------|-------------|--------------|--------------|---------|
| 1      | 3.512         | VB   | 0.1292      | 21.04389     | 1.93720      | 0.3362  |
| 2      | 8.625         | BV   | 0.0336      | 252.08754    | 112.73808    | 4.0278  |
| 3      | 8.682         | VV   | 0.0602      | 5956.11426   | 1370.96179   | 95.1661 |
| 4      | 9.498         | BB   | 0.0684      | 6.69030      | 1.27198      | 0.1069  |
| 5      | 9.953         | BV   | 0.0697      | 12.64812     | 2.45145      | 0.2021  |
| 6      | 13.363        | BB   | 0.0622      | 10.06762     | 2.31454      | 0.1609  |

Total s : 6258.65173 1491.67503

=====  
 \*\*\* End of Report \*\*\*

```
=====
Acq. Operator   : SYSTEM
Acq. Instrument : HPLC-Solaja           Location : Vial 87
Injection Date  : 2/27/2014 9:23:31 AM
                                           Inj Volume : 10.000 µl
Acq. Method    : C:\CHEM32\1\METHODS\METODA 24.M
Last changed   : 2/27/2014 8:32:34 AM by SYSTEM
                 (modified after loading)
Analysis Method : C:\CHEM32\1\METHODS\PRANJE.M
Last changed   : 9/18/2013 2:53:53 PM by SYSTEM
=====
```

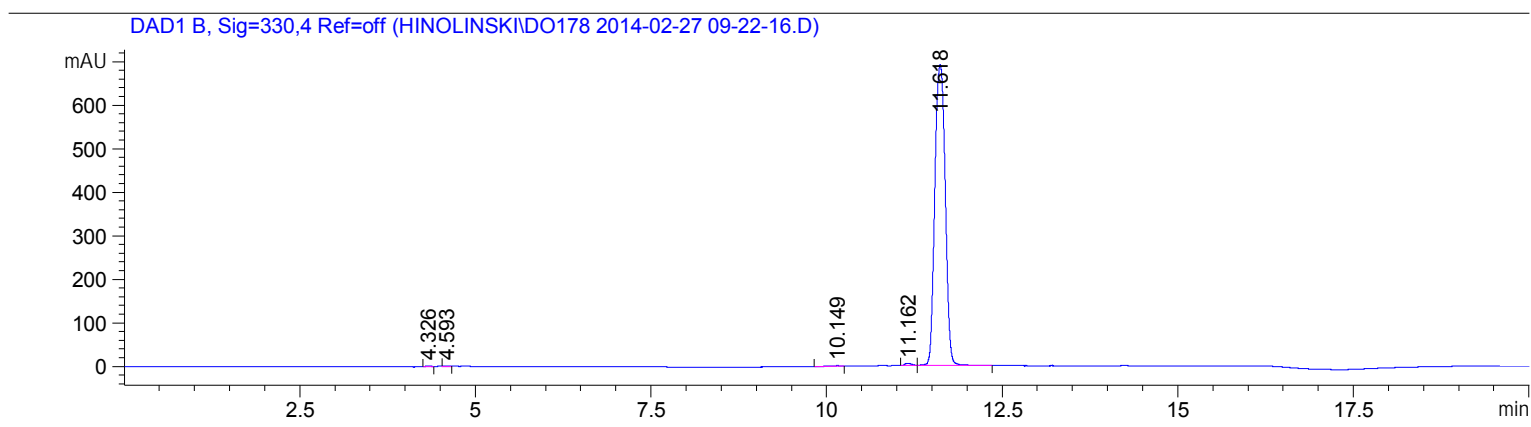

```
=====
Fraction Information
=====
```

No Fractions found.

```
=====
Area Percent Report
=====
```

```
Sorted By      : Signal
Multiplier     : 1.0000
Dilution       : 1.0000
Use Multiplier & Dilution Factor with ISTDs
```

Sample Name: D0178

Signal 2: DAD1 B, Sig=330,4 Ref=off

| Peak # | RetTime [min] | Type | Width [min] | Area [mAU*s] | Height [mAU] | Area %  |
|--------|---------------|------|-------------|--------------|--------------|---------|
| 1      | 4.326         | BB   | 0.0662      | 8.77658      | 1.64607      | 0.1219  |
| 2      | 4.593         | VV   | 0.0619      | 6.46930      | 1.28189      | 0.0899  |
| 3      | 10.149        | BB   | 0.0979      | 10.87971     | 1.32378      | 0.1511  |
| 4      | 11.162        | BV   | 0.0861      | 34.76116     | 4.88114      | 0.4829  |
| 5      | 11.618        | VB   | 0.1665      | 7137.80811   | 691.08551    | 99.1542 |

Totals :                               7198.69486   700.21840

=====  
\*\*\* End of Report \*\*\*



```

=====
Acq. Operator   : SYSTEM                      Seq. Line :    1
Acq. Instrument : HPLC-Solaja                 Location  : Vial 1
Injection Date  : 2/20/2014 1:23:06 PM       Inj       :    1
                                                    Inj Volume: 10.000 µl
Method          : C:\CHEM32\1\DATA\HINOLINSKI\HINOLINSKI 4 2014-02-20 13-21-50\METODA 7.M (
                : Sequence Method)
Last changed    : 2/20/2014 1:21:50 PM by SYSTEM
  
```

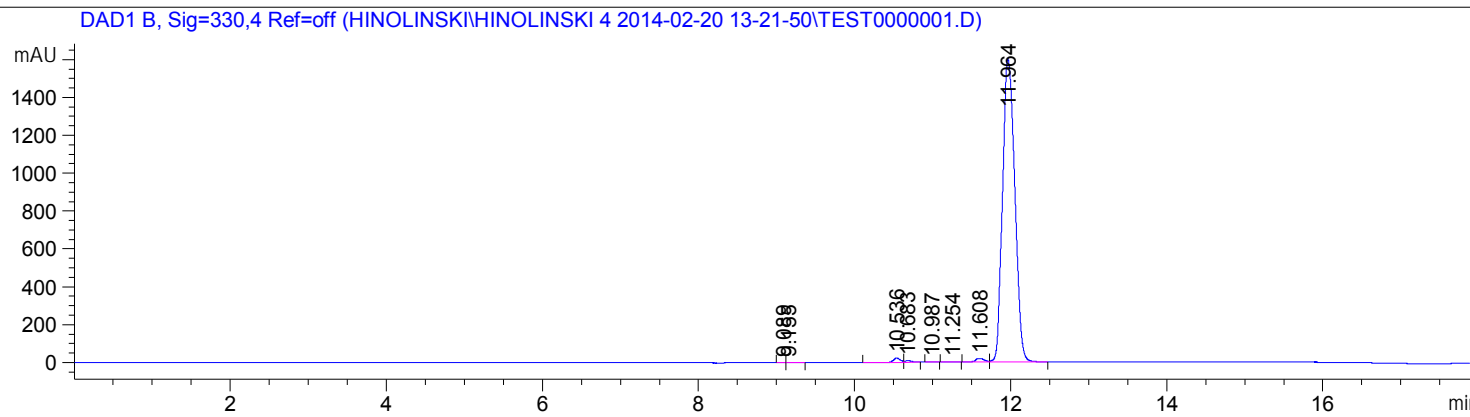

Fraction Information

No Fractions found.

Area Percent Report

```

Sorted By      : Signal
Multiplier     : 1.0000
Dilution       : 1.0000
Use Multiplier & Dilution Factor with ISTDs
  
```

Signal 2: DAD1 B, Sig=330,4 Ref=off

| Peak # | RetTime [min] | Type | Width [min] | Area [mAU*s] | Height [mAU] | Area %  |
|--------|---------------|------|-------------|--------------|--------------|---------|
| 1      | 9.089         | VV   | 0.0618      | 8.54477      | 1.70955      | 0.0479  |
| 2      | 9.155         | VB   | 0.0707      | 12.71255     | 2.15816      | 0.0712  |
| 3      | 10.536        | BV   | 0.0908      | 141.91032    | 23.05680     | 0.7949  |
| 4      | 10.683        | VB   | 0.0870      | 51.84019     | 8.33943      | 0.2904  |
| 5      | 10.987        | BB   | 0.0560      | 5.44765      | 1.17759      | 0.0305  |
| 6      | 11.254        | BB   | 0.0884      | 9.70442      | 1.36534      | 0.0544  |
| 7      | 11.608        | BV   | 0.1009      | 139.59642    | 18.31508     | 0.7819  |
| 8      | 11.964        | VB   | 0.1659      | 1.74833e4    | 1601.37720   | 97.9289 |

Totals : 1.78530e4 1657.49914

\*\*\* End of Report \*\*\*

```

=====
Acq. Operator   : SYSTEM
Acq. Instrument : HPLC-Solaja           Location : Vial 85
Injection Date  : 2/27/2014 8:34:10 AM
                                           Inj Volume : 10.000 µl
Acq. Method     : C:\CHEM32\1\METHODS\METODA 24.M
Last changed    : 2/27/2014 8:32:34 AM by SYSTEM
                  (modified after loading)
Analysis Method  : C:\CHEM32\1\METHODS\PRANJE.M
  
```

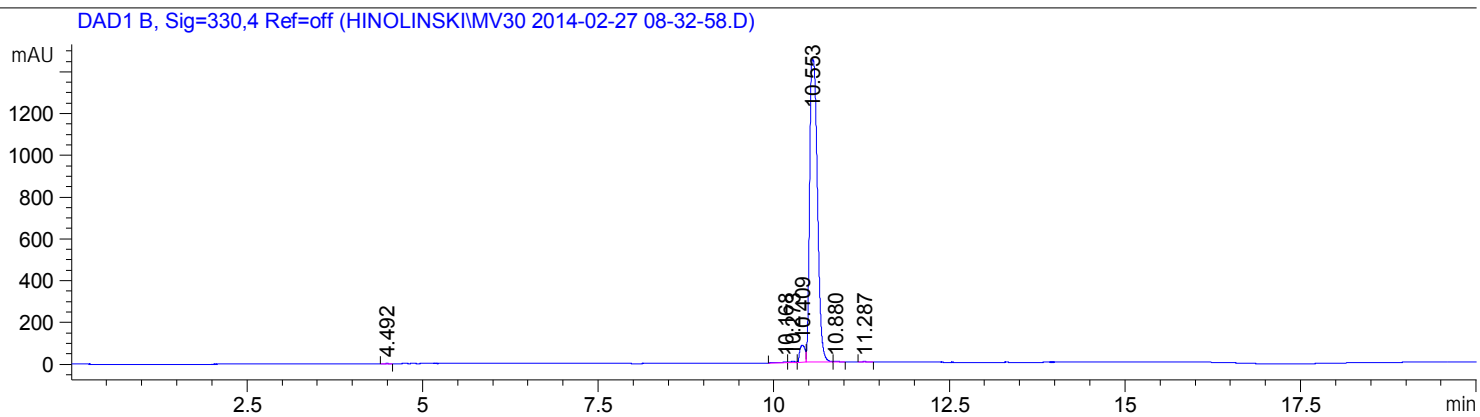

=====  
 Fraction Information  
 =====

No Fractions found.  
 =====

=====  
 Area Percent Report  
 =====

```

Sorted By      :      Signal
Multiplier     :      1.0000
Dilution       :      1.0000
Use Multiplier & Dilution Factor with ISTDs
  
```

Signal 2: DAD1 B, Sig=330,4 Ref=off

| Peak # | RetTime [min] | Type | Width [min] | Area [mAU*s] | Height [mAU] | Area %  |
|--------|---------------|------|-------------|--------------|--------------|---------|
| 1      | 4.492         | BB   | 0.0673      | 6.42647      | 1.17558      | 0.0556  |
| 2      | 10.168        | BV   | 0.0933      | 18.56855     | 2.46612      | 0.1606  |
| 3      | 10.273        | VV   | 0.0830      | 26.76161     | 4.24795      | 0.2314  |
| 4      | 10.409        | VV   | 0.0862      | 426.93210    | 82.11183     | 3.6917  |
| 5      | 10.553        | VB   | 0.1210      | 1.10575e4    | 1449.50037   | 95.6142 |
| 6      | 10.880        | BB   | 0.0677      | 10.34705     | 1.97354      | 0.0895  |
| 7      | 11.287        | BB   | 0.0784      | 18.17168     | 2.83167      | 0.1571  |

Totals :                    1.15647e4  1544.30705

=====  
 \*\*\* End of Report \*\*\*

=====

|                 |                                                                                             |            |            |
|-----------------|---------------------------------------------------------------------------------------------|------------|------------|
| Acq. Operator   | : SYSTEM                                                                                    | Seq. Line  | : 1        |
| Acq. Instrument | : HPLC-Solaja                                                                               | Location   | : Vial 21  |
| Injection Date  | : 2/19/2014 2:20:00 PM                                                                      | Inj        | : 1        |
|                 |                                                                                             | Inj Volume | : 5.000 µl |
| Method          | : C:\CHEM32\1\DATA\HINOLINSKI\HINOLINSKI 2 2014-02-19 14-18-46\METODA 7.M (Sequence Method) |            |            |
| Last changed    | : 2/19/2014 2:18:46 PM by SYSTEM                                                            |            |            |

DAD1 B, Sig=330,4 Ref=off (HINOLINSKI\HINOLINSKI 2 2014-02-19 14-18-46\TEST000001.D)

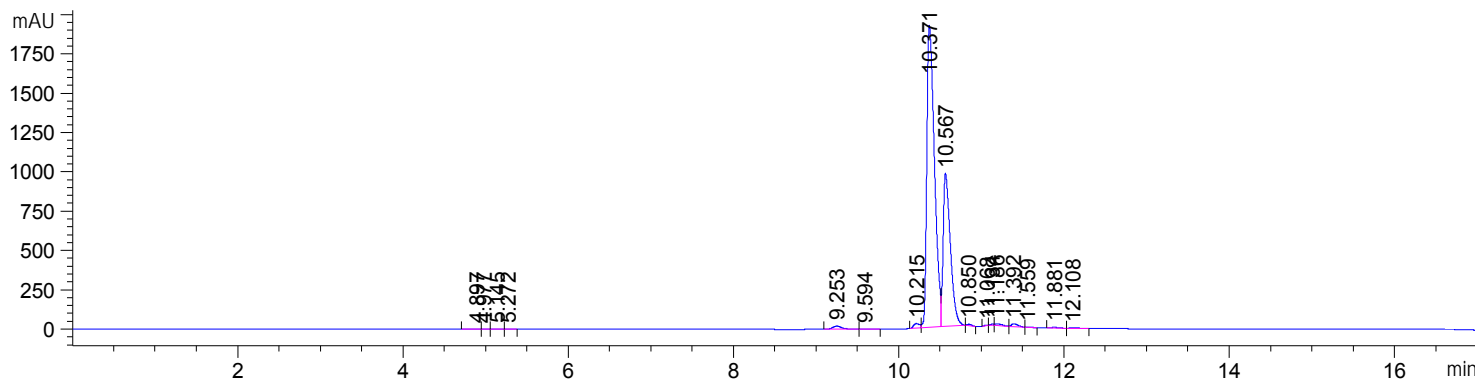

=====  
Fraction Information  
=====

No Fractions found.  
=====

=====  
Area Percent Report  
=====

Sorted By : Signal  
Multiplier : 1.0000  
Dilution : 1.0000  
Use Multiplier & Dilution Factor with ISTDs

Signal 2: DAD1 B, Sig=330,4 Ref=off

| Peak # | RetTime [min] | Type | Width [min] | Area [mAU*s] | Height [mAU] | Area %  |
|--------|---------------|------|-------------|--------------|--------------|---------|
| 1      | 4.897         | BV   | 0.1073      | 24.18136     | 2.84077      | 0.1276  |
| 2      | 4.977         | VB   | 0.0554      | 8.57369      | 2.20271      | 0.0452  |
| 3      | 5.145         | BV   | 0.0819      | 20.64248     | 3.01480      | 0.1089  |
| 4      | 5.272         | VB   | 0.0673      | 7.01048      | 1.28158      | 0.0370  |
| 5      | 9.253         | BV   | 0.1219      | 176.33762    | 21.35053     | 0.9307  |
| 6      | 9.594         | VB   | 0.0936      | 9.36458      | 1.19286      | 0.0494  |
| 7      | 10.215        | BV   | 0.0802      | 150.01939    | 29.57986     | 0.7918  |
| 8      | 10.371        | VV   | 0.0992      | 1.23132e4    | 1922.30261   | 64.9853 |
| 9      | 10.567        | VB   | 0.0940      | 5926.94336   | 974.06238    | 31.2806 |
| 10     | 10.850        | BB   | 0.0654      | 37.13902     | 9.33766      | 0.1960  |
| 11     | 11.068        | BB   | 0.0502      | 7.29534      | 2.17178      | 0.0385  |
| 12     | 11.134        | BV   | 0.0427      | 21.07627     | 7.75579      | 0.1112  |
| 13     | 11.186        | VB   | 0.0798      | 69.94500     | 11.52516     | 0.3691  |
| 14     | 11.392        | BV   | 0.0884      | 96.42045     | 17.19282     | 0.5089  |
| 15     | 11.559        | VB   | 0.0803      | 16.61453     | 2.84007      | 0.0877  |
| 16     | 11.881        | BB   | 0.0897      | 36.33640     | 5.28650      | 0.1918  |
| 17     | 12.108        | BB   | 0.0912      | 26.56188     | 3.88792      | 0.1402  |

Totals : 1.89477e4 3017.82580

=====  
\*\*\* End of Report \*\*\*



Signal 1: DAD1 A, Sig=254,4 Ref=off

| Peak # | RetTime [min] | Type | Width [min] | Area [mAU*s] | Height [mAU] | Area %  |
|--------|---------------|------|-------------|--------------|--------------|---------|
| 1      | 7.598         | BV   | 0.0737      | 140.26274    | 27.65811     | 0.7675  |
| 2      | 8.344         | BB   | 0.0408      | 103.46177    | 39.16729     | 0.5662  |
| 3      | 8.533         | VV   | 0.0752      | 1.39331e4    | 2867.69385   | 76.2442 |
| 4      | 8.731         | VB   | 0.0612      | 3441.26855   | 783.84924    | 18.8312 |
| 5      | 9.005         | VB   | 0.0527      | 106.27769    | 29.41607     | 0.5816  |
| 6      | 9.261         | BV   | 0.0698      | 364.46271    | 86.19911     | 1.9944  |
| 7      | 9.370         | VB   | 0.0553      | 150.82022    | 39.68163     | 0.8253  |
| 8      | 9.477         | BB   | 0.0490      | 34.65574     | 10.37789     | 0.1896  |

Totals : 1.82743e4 3884.04320

=====  
\*\*\* End of Report \*\*\*



Sample Name: DOJK09-G

## Compound 65

## Method C

```

=====
Acq. Operator   : SYSTEM
Acq. Instrument : HPLC-Solaja           Location  : Vial 82
Injection Date  : 2/26/2014 7:59:02 PM
                                           Inj Volume : 1.000 µl

Acq. Method     : C:\CHEM32\1\METHODS\METODA 7.M
Last changed    : 2/26/2014 7:52:38 PM by SYSTEM
                 (modified after loading)

Analysis Method : C:\CHEM32\1\METHODS\PRANJE.M
Last changed    : 9/18/2013 2:53:53 PM by SYSTEM
=====

```

DAD1 B, Sig=330,4 Ref=off (HINOLINSKI\DOJK09-G 2014-02-26 19-57-56.D)

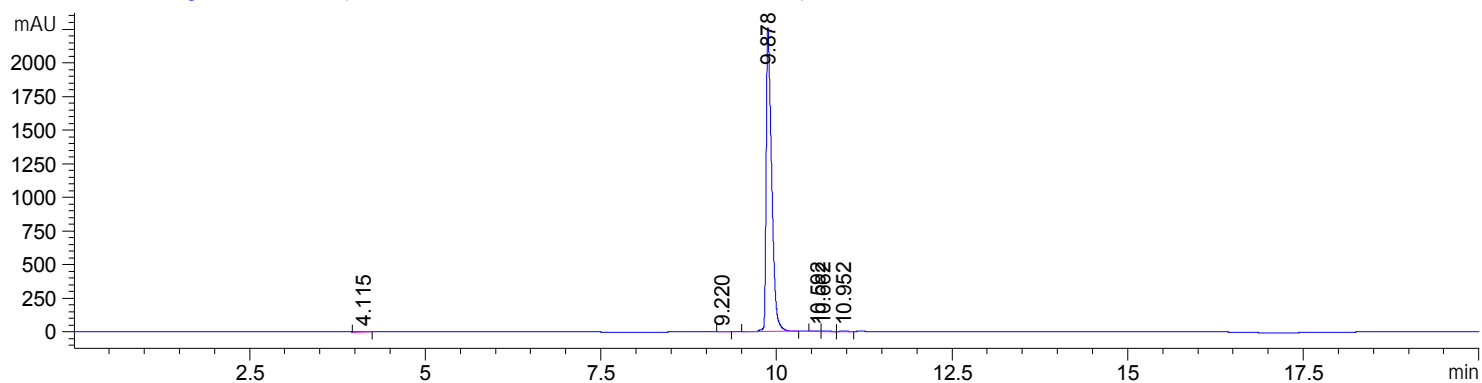

```

=====
Fraction Information
=====

```

```

=====
No Fractions found.
=====

```

```

=====
Area Percent Report
=====

```

```

Sorted By           :      Signal
Multiplier          :      1.0000
Dilution            :      1.0000
Use Multiplier & Dilution Factor with ISTDs

```

Signal 2: DAD1 B, Sig=330,4 Ref=off

| Peak # | RetTime [min] | Type | Width [min] | Area [mAU*s] | Height [mAU] | Area %  |
|--------|---------------|------|-------------|--------------|--------------|---------|
| 1      | 4.115         | BB   | 0.1399      | 15.96979     | 1.36559      | 0.1294  |
| 2      | 9.220         | BB   | 0.0590      | 9.45455      | 1.98570      | 0.0766  |
| 3      | 9.878         | BB   | 0.0843      | 1.22533e4    | 2258.72559   | 99.2982 |
| 4      | 10.592        | VV   | 0.0887      | 27.94959     | 4.17232      | 0.2265  |
| 5      | 10.662        | VB   | 0.0714      | 20.14357     | 3.76592      | 0.1632  |
| 6      | 10.952        | BB   | 0.0733      | 13.08130     | 2.17050      | 0.1060  |

```
Totals :                1.23399e4  2272.18561
```

```

=====
*** End of Report ***

```





```

=====
Acq. Operator   : SYSTEM
Acq. Instrument : HPLC-Solaja           Location  : Vial 72
Injection Date  : 2/27/2014 5:41:07 PM
                                           Inj Volume : 2.000 µl
Acq. Method     : C:\CHEM32\1\METHODS\METODA 24.M
Last changed    : 2/27/2014 5:39:53 PM by SYSTEM
                  (modified after loading)
Analysis Method : C:\CHEM32\1\METHODS\PRANJE.M
Last changed    : 9/18/2013 2:53:53 PM by SYSTEM
  
```

DAD1 B, Sig=330,4 Ref=off (HINOLINSKI\DOZS15 2014-02-27 17-39-59.D)

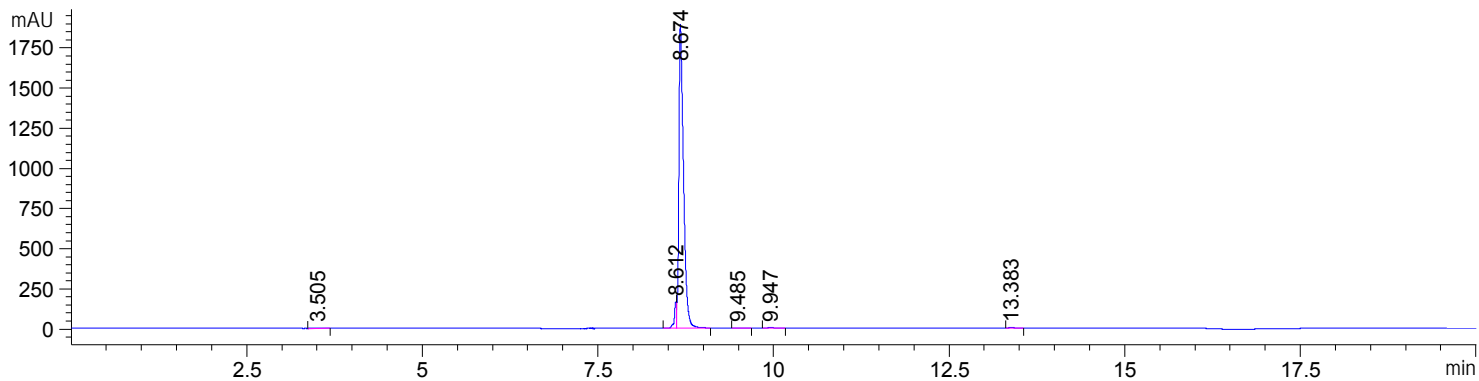

=====  
 Fraction Information  
 =====

No Fractions found.  
 =====

=====  
 Area Percent Report  
 =====

Sorted By : Signal  
 Multiplier : 1.0000  
 Dilution : 1.0000  
 Use Multiplier & Dilution Factor with ISTDs

Signal 2: DAD1 B, Sig=330,4 Ref=off

| Peak # | RetTime [min] | Type | Width [min] | Area [mAU*s] | Height [mAU] | Area %  |
|--------|---------------|------|-------------|--------------|--------------|---------|
| 1      | 3.505         | VB   | 0.1397      | 21.50900     | 1.85658      | 0.2362  |
| 2      | 8.612         | BV   | 0.0337      | 369.45660    | 164.55032    | 4.0564  |
| 3      | 8.674         | VV   | 0.0710      | 8677.65723   | 1891.88940   | 95.2748 |
| 4      | 9.485         | BB   | 0.0673      | 7.12599      | 1.29212      | 0.0782  |
| 5      | 9.947         | BB   | 0.0775      | 14.55247     | 2.55314      | 0.1598  |
| 6      | 13.383        | BB   | 0.0620      | 17.73038     | 4.05211      | 0.1947  |

Totals : 9108.03167 2066.19368

=====  
 \*\*\* End of Report \*\*\*



```

=====
Acq. Operator   : SYSTEM
Acq. Instrument : HPLC-Solaja           Location : Vial 5
Injection Date  : 2/28/2014 10:30:04 AM
                                           Inj Volume : 2.000 µl

Acq. Method     : C:\CHEM32\1\METHODS\METODA 25.M
Last changed    : 2/28/2014 10:28:47 AM by SYSTEM
                  (modified after loading)

Analysis Method : C:\CHEM32\1\METHODS\PRANJE.M
Last changed    : 9/18/2013 2:53:53 PM by SYSTEM
  
```

DAD1 B, Sig=330,4 Ref=off (HINOLINSKI\DOZS12 2014-02-28 10-28-51.D)

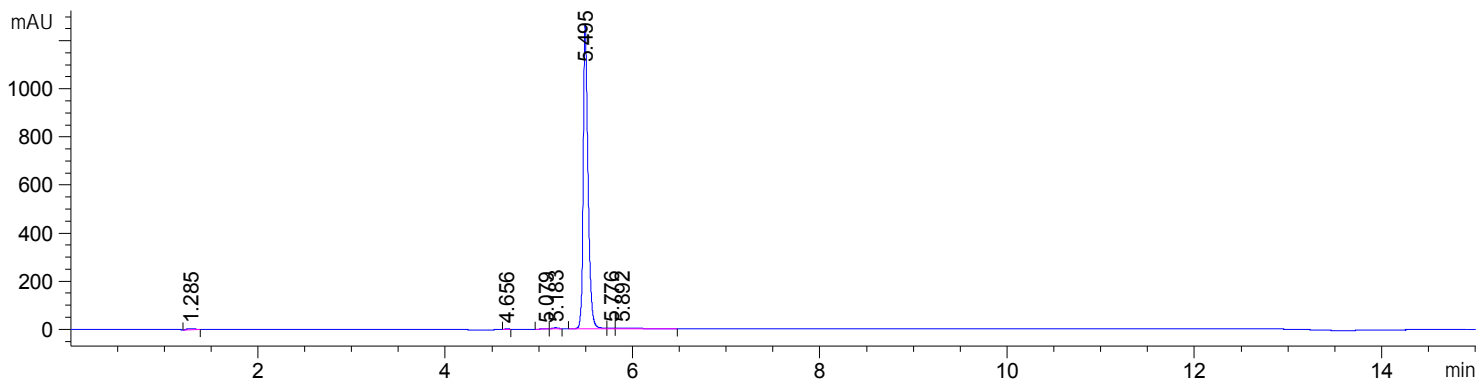

=====  
 Fraction Information  
 =====

No Fractions found.  
 =====

=====  
 Area Percent Report  
 =====

```

Sorted By      :      Signal
Multiplier     :      1.0000
Dilution       :      1.0000
Use Multiplier & Dilution Factor with ISTDs
  
```

Signal 2: DAD1 B, Sig=330,4 Ref=off

| Peak # | RetTime [min] | Type | Width [min] | Area [mAU*s] | Height [mAU] | Area %  |
|--------|---------------|------|-------------|--------------|--------------|---------|
| 1      | 1.285         | BB   | 0.0764      | 30.82211     | 5.10553      | 0.6626  |
| 2      | 4.656         | BV   | 0.0422      | 12.17721     | 4.09883      | 0.2618  |
| 3      | 5.079         | BV   | 0.0544      | 11.05448     | 2.69109      | 0.2376  |
| 4      | 5.183         | VV   | 0.0616      | 22.25791     | 4.98515      | 0.4785  |
| 5      | 5.495         | BV   | 0.0538      | 4514.38184   | 1260.92078   | 97.0470 |
| 6      | 5.776         | VV   | 0.0597      | 14.55320     | 3.22330      | 0.3129  |
| 7      | 5.892         | VB   | 0.1987      | 46.50219     | 2.79328      | 0.9997  |

Totals :                      4651.74893 1283.81795

=====  
 \*\*\* End of Report \*\*\*



Sample Name: MV22      Compound 45      Method D

```

=====
Acq. Operator   : SYSTEM                               Seq. Line :    9
Acq. Instrument : HPLC-Solaja                          Location  : Vial 71
Injection Date  : 2/27/2014 11:56:36 PM                Inj       :    1
                                                    Inj Volume: 2.000 µl
Method          : C:\CHEM32\1\DATA\HINOLINSKI\HINOLINSKI 11 2014-02-27 21-05-38\METODA 25.M (
                  Sequence Method)
Last changed    : 2/27/2014 9:05:38 PM by SYSTEM
    
```

DAD1 B, Sig=330,4 Ref=off (HINOLINSKI\HINOLINSKI 11 2014-02-27 21-05-38\TEST000009.D)

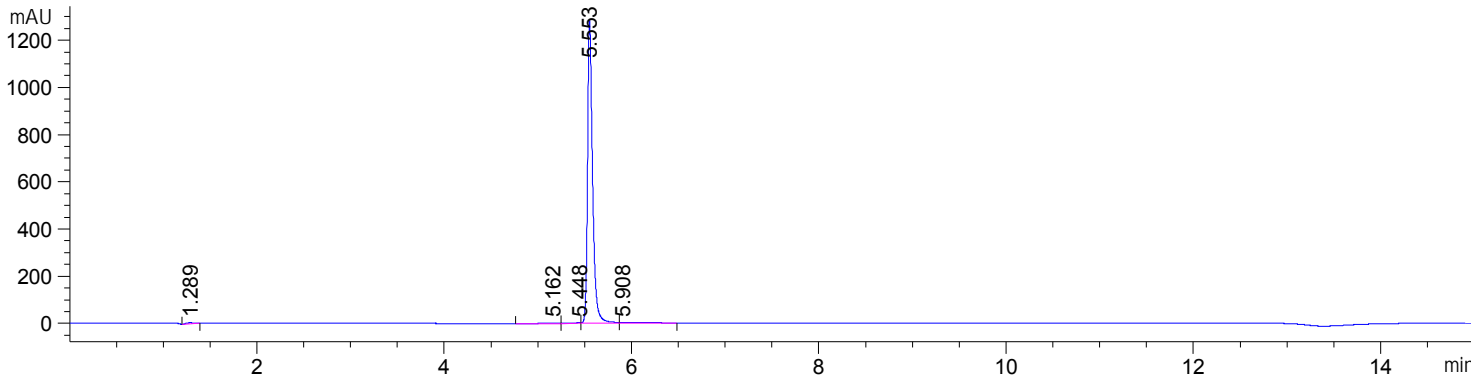

Fraction Information

No Fractions found.

Area Percent Report

```

Sorted By      :      Signal
Multiplier     :      1.0000
Dilution       :      1.0000
Use Multiplier & Dilution Factor with ISTDs
    
```

Signal 2: DAD1 B, Sig=330,4 Ref=off

| Peak # | RetTime [min] | Type | Width [min] | Area [mAU*s] | Height [mAU] | Area %  |
|--------|---------------|------|-------------|--------------|--------------|---------|
| 1      | 1.289         | BB   | 0.0772      | 32.15473     | 5.23525      | 0.6476  |
| 2      | 5.162         | BV   | 0.1235      | 31.88377     | 3.17802      | 0.6421  |
| 3      | 5.448         | VV   | 0.0875      | 29.10960     | 4.27066      | 0.5862  |
| 4      | 5.553         | VV   | 0.0558      | 4808.14307   | 1280.33252   | 96.8295 |
| 5      | 5.908         | VB   | 0.2011      | 64.28740     | 3.75680      | 1.2947  |

Totals :                      4965.57857 1296.77325

\*\*\* End of Report \*\*\*

=====  
Acq. Operator : SYSTEM  
Acq. Instrument : HPLC-Solaja Location : Vial 54  
Injection Date : 2/28/2014 9:36:13 AM Inj Volume : 2.000 µl  
Acq. Method : C:\CHEM32\1\METHODS\METODA 25.M  
Last changed : 2/28/2014 9:12:27 AM by SYSTEM  
(modified after loading)  
Analysis Method : C:\CHEM32\1\METHODS\PRANJE.M  
Last changed : 9/18/2013 2:53:53 PM by SYSTEM  
(modified after loading)

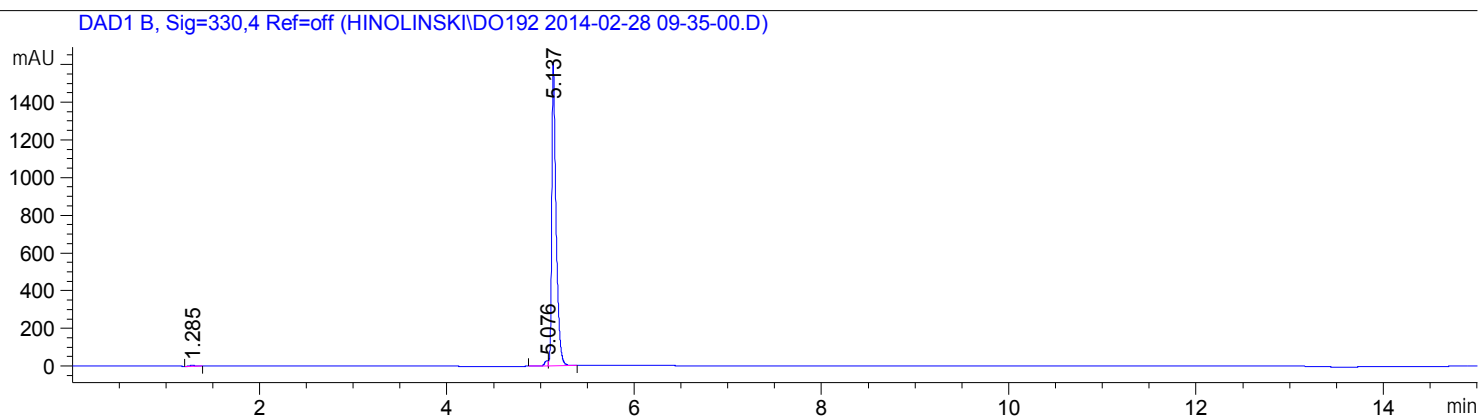

=====  
Fraction Information  
=====

No Fractions found.  
=====

=====  
Area Percent Report  
=====

Sorted By : Signal  
Multiplier : 1.0000  
Dilution : 1.0000  
Use Multiplier & Dilution Factor with ISTDs

Signal 2: DAD1 B, Sig=330,4 Ref=off

| Peak # | RetTime [min] | Type | Width [min] | Area [mAU*s] | Height [mAU] | Area %  |
|--------|---------------|------|-------------|--------------|--------------|---------|
| 1      | 1.285         | BB   | 0.0900      | 31.90867     | 5.24447      | 0.6086  |
| 2      | 5.076         | BV   | 0.0408      | 73.09942     | 28.11178     | 1.3943  |
| 3      | 5.137         | VB   | 0.0457      | 5137.63428   | 1611.56714   | 97.9970 |

Totals : 5242.64236 1644.92340

=====  
\*\*\* End of Report \*\*\*

Sample Name: ST14 Compound 56

```

=====
Acq. Operator   : SYSTEM
Acq. Instrument : HPLC-Solaja           Location : Vial 54
Injection Date  : 2/27/2014 8:30:42 PM
                                           Inj Volume : 5.000 µl
Acq. Method     : C:\CHEM32\1\METHODS\METODA 24.M
Last changed    : 2/27/2014 8:33:45 PM by SYSTEM
                  (modified after loading)
Analysis Method : C:\CHEM32\1\METHODS\PRANJE.M
Last changed    : 9/18/2013 2:53:53 PM by SYSTEM
=====

```

DAD1 B, Sig=330,4 Ref=off (HINOLINSKI\UVFI 2014-02-27 20-29-26.D)

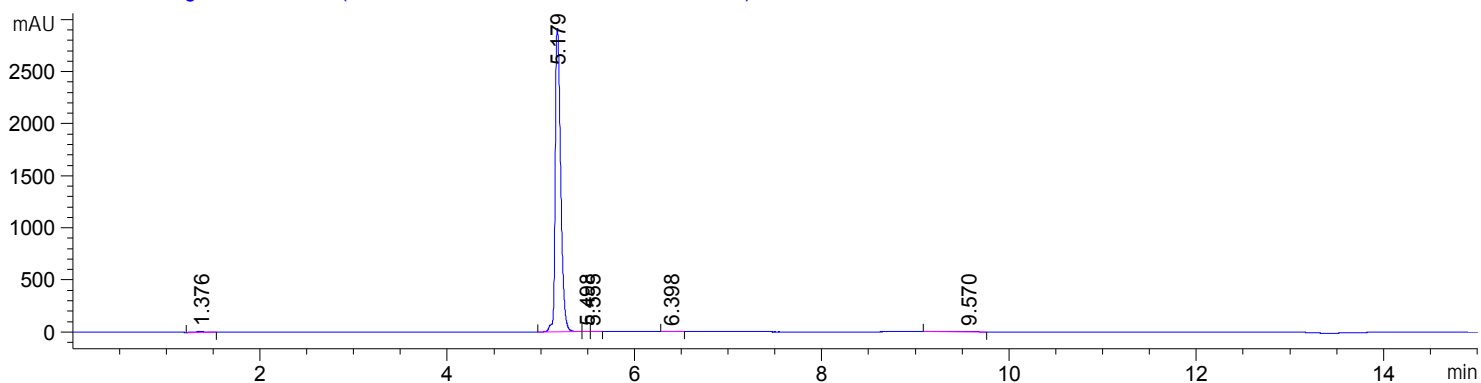

```

=====
Fraction Information
=====

```

```

=====
No Fractions found.
=====

```

```

=====
Area Percent Report
=====

```

```

Sorted By       : Signal
Multiplier      : 1.0000
Dilution        : 1.0000
Use Multiplier & Dilution Factor with ISTDs

```

Signal 2: DAD1 B, Sig=330,4 Ref=off

| Peak # | RetTime [min] | Type | Width [min] | Area [mAU*s] | Height [mAU] | Area %  |
|--------|---------------|------|-------------|--------------|--------------|---------|
| 1      | 1.376         | BB   | 0.1502      | 70.69771     | 5.77826      | 0.5856  |
| 2      | 5.179         | VV   | 0.0552      | 1.19118e4    | 2914.95850   | 98.6723 |
| 3      | 5.498         | VV   | 0.0564      | 12.32152     | 2.88321      | 0.1021  |
| 4      | 5.555         | VB   | 0.0545      | 10.09038     | 2.22248      | 0.0836  |
| 5      | 6.398         | VB   | 0.0602      | 16.21222     | 3.36451      | 0.1343  |
| 6      | 9.570         | BB   | 0.2250      | 50.95580     | 2.66631      | 0.4221  |

```
Totals :                1.20721e4  2931.87327
```

```

=====
*** End of Report ***

```



```

=====
Acq. Operator   : SYSTEM                               Seq. Line :    2
Acq. Instrument : HPLC-Solaja                          Location  : Vial 72
Injection Date  : 2/27/2014 9:28:04 PM                Inj       :    1
                                                    Inj Volume: 2.000 µl
Method          : C:\CHEM32\1\DATA\HINOLINSKI\HINOLINSKI 11 2014-02-27 21-05-38\METODA 25.M (
                  Sequence Method)
Last changed    : 2/27/2014 9:05:38 PM by SYSTEM
  
```

DAD1 B, Sig=330,4 Ref=off (HINOLINSKI\HINOLINSKI 11 2014-02-27 21-05-38\TEST000002.D)

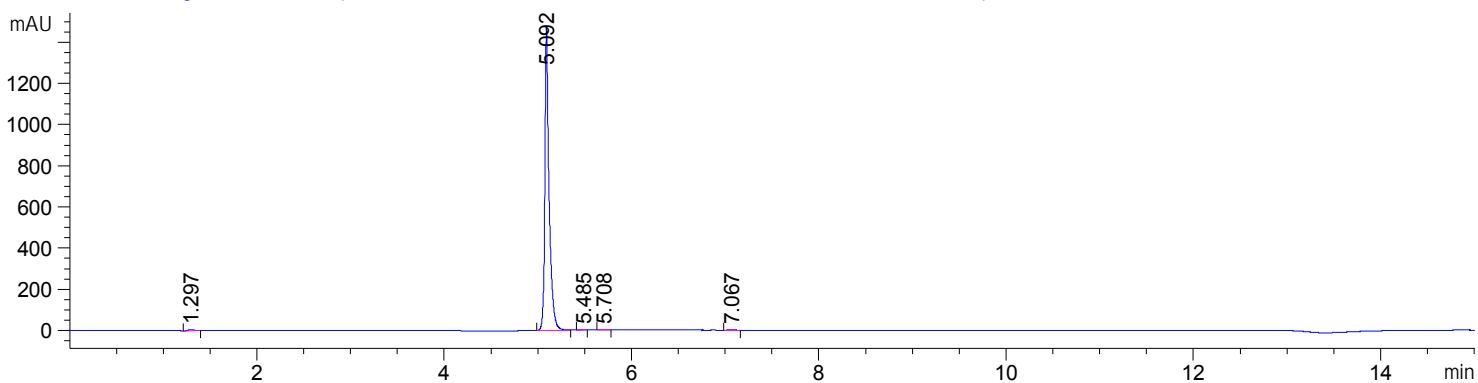

Fraction Information

No Fractions found.

Area Percent Report

```

Sorted By      : Signal
Multiplier     : 1.0000
Dilution       : 1.0000
Use Multiplier & Dilution Factor with ISTDs
  
```

Signal 2: DAD1 B, Sig=330,4 Ref=off

| Peak # | RetTime [min] | Type | Width [min] | Area [mAU*s] | Height [mAU] | Area %  |
|--------|---------------|------|-------------|--------------|--------------|---------|
| 1      | 1.297         | BB   | 0.0766      | 30.77659     | 5.15579      | 0.6570  |
| 2      | 5.092         | BV   | 0.0443      | 4631.22754   | 1468.61035   | 98.8594 |
| 3      | 5.485         | VV   | 0.0625      | 8.02072      | 1.55961      | 0.1712  |
| 4      | 5.708         | VV   | 0.0625      | 8.42438      | 1.72487      | 0.1798  |
| 5      | 7.067         | BB   | 0.0536      | 6.20943      | 1.68097      | 0.1325  |

Totals : 4684.65866 1478.73159

\*\*\* End of Report \*\*\*

Sample Name: D0178 Compound 58 Method D

```

=====
Acq. Operator   : SYSTEM
Acq. Instrument : HPLC-Solaja           Location : Vial 87
Injection Date  : 2/28/2014 8:55:56 AM
                                           Inj Volume : 7.500 µl
Acq. Method     : C:\CHEM32\1\METHODS\METODA 25.M
Last changed    : 2/28/2014 8:54:30 AM by SYSTEM
                  (modified after loading)
Analysis Method  : C:\CHEM32\1\METHODS\PRANJE.M
Last changed    : 9/18/2013 2:53:53 PM by SYSTEM
=====

```

DAD1 B, Sig=330,4 Ref=off (HINOLINSKI\DO178 2014-02-28 08-54-42.D)

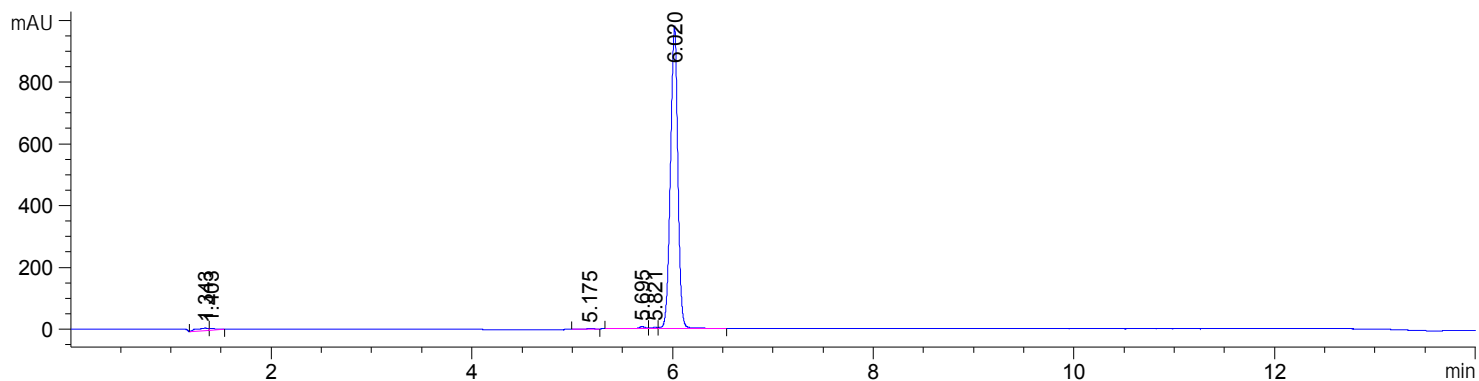

```

=====
Fraction Information
=====

```

```

=====
No Fractions found.
=====

```

```

=====
Area Percent Report
=====

```

```

Sorted By      :      Signal
Multiplier     :      1.0000
Dilution       :      1.0000
Use Multiplier & Dilution Factor with ISTDs

```

Signal 2: DAD1 B, Sig=330,4 Ref=off

| Peak # | RetTime [min] | Type | Width [min] | Area [mAU*s] | Height [mAU] | Area %  |
|--------|---------------|------|-------------|--------------|--------------|---------|
| 1      | 1.343         | BV   | 0.1169      | 67.87621     | 7.51195      | 1.3109  |
| 2      | 1.403         | VB   | 0.0573      | 23.39939     | 5.42418      | 0.4519  |
| 3      | 5.175         | BV   | 0.0677      | 8.89435      | 1.59157      | 0.1718  |
| 4      | 5.695         | BV   | 0.0760      | 43.59182     | 7.58748      | 0.8419  |
| 5      | 5.821         | VV   | 0.0586      | 18.57452     | 3.96548      | 0.3587  |
| 6      | 6.020         | VB   | 0.0793      | 5015.60059   | 977.76709    | 96.8648 |

```
Totals :                5177.93688 1003.84776
```

```

=====
*** End of Report ***

```

```

=====
Acq. Operator   : SYSTEM                               Seq. Line :   10
Acq. Instrument : HPLC-Solaja                          Location  : Vial 61
Injection Date  : 2/28/2014 12:17:50 AM                Inj       :    1
                                                    Inj Volume: 2.000 µl
Method          : C:\CHEM32\1\DATA\HINOLINSKI\HINOLINSKI 11 2014-02-27 21-05-38\METODA 25.M (
                  Sequence Method)
Last changed    : 2/27/2014 9:05:38 PM by SYSTEM
  
```

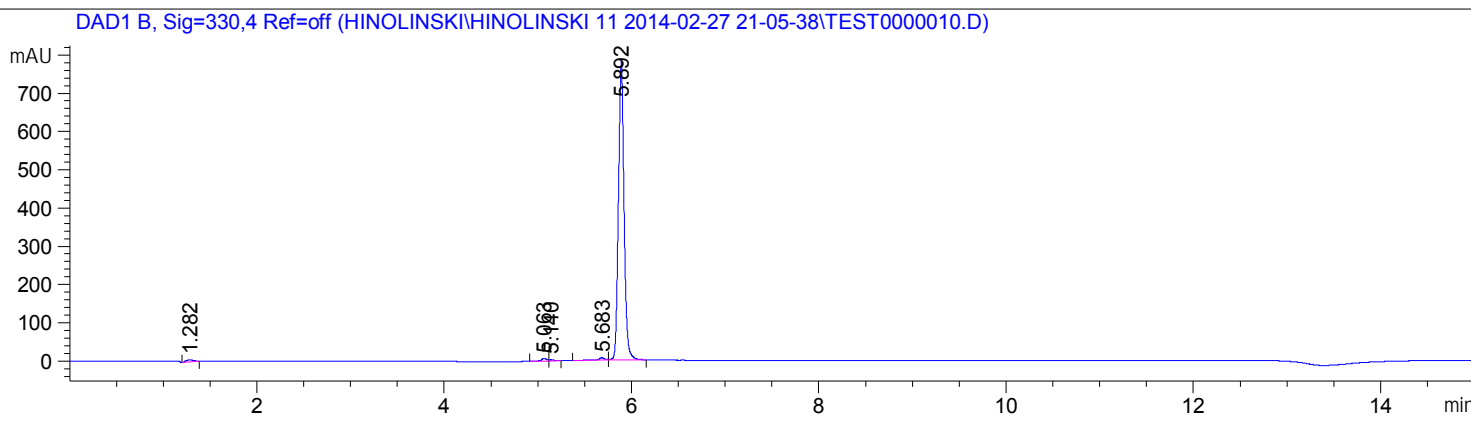

Fraction Information

No Fractions found.

Area Percent Report

```

Sorted By      :      Signal
Multiplier     :      1.0000
Dilution       :      1.0000
Use Multiplier & Dilution Factor with ISTDs
  
```

Signal 2: DAD1 B, Sig=330,4 Ref=off

| Peak # | RetTime [min] | Type | Width [min] | Area [mAU*s] | Height [mAU] | Area %  |
|--------|---------------|------|-------------|--------------|--------------|---------|
| 1      | 1.282         | BB   | 0.0879      | 31.53892     | 5.34119      | 0.9388  |
| 2      | 5.063         | BV   | 0.0566      | 26.59043     | 6.95812      | 0.7915  |
| 3      | 5.140         | VB   | 0.0493      | 11.97652     | 3.34003      | 0.3565  |
| 4      | 5.683         | BV   | 0.0710      | 36.46378     | 6.86361      | 1.0854  |
| 5      | 5.892         | VB   | 0.0655      | 3252.84106   | 782.67798    | 96.8277 |

Totals :                      3359.41072    805.18092

\*\*\* End of Report \*\*\*

=====  
Acq. Operator : SYSTEM  
Acq. Instrument : HPLC-Solaja Location : Vial 53  
Injection Date : 2/28/2014 10:54:17 AM Inj Volume : 2.000 µl  
Acq. Method : C:\CHEM32\1\METHODS\METODA 25.M  
Last changed : 2/28/2014 10:28:47 AM by SYSTEM  
(modified after loading)  
Analysis Method : C:\CHEM32\1\METHODS\PRANJE.M  
Last changed : 9/18/2013 2:53:53 PM by SYSTEM

DAD1 B, Sig=330,4 Ref=off (HINOLINSKI\DO180 2014-02-28 10-53-04.D)

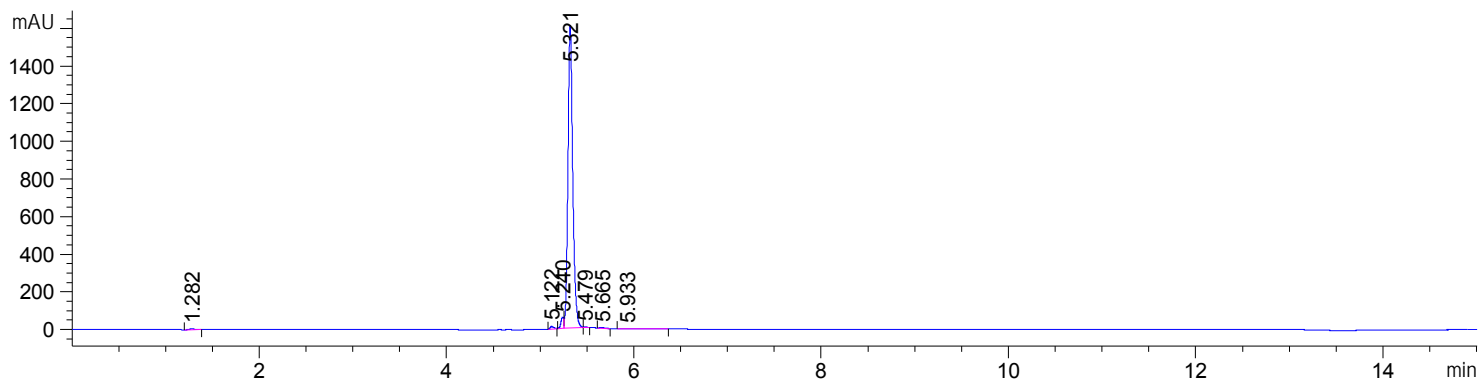

=====  
Fraction Information  
=====

No Fractions found.  
=====

=====  
Area Percent Report  
=====

Sorted By : Signal  
Multiplier : 1.0000  
Dilution : 1.0000  
Use Multiplier & Dilution Factor with ISTDs

Signal 2: DAD1 B, Sig=330,4 Ref=off

| Peak # | RetTime [min] | Type | Width [min] | Area [mAU*s] | Height [mAU] | Area %  |
|--------|---------------|------|-------------|--------------|--------------|---------|
| 1      | 1.282         | BB   | 0.0746      | 31.32107     | 5.21197      | 0.5260  |
| 2      | 5.122         | BB   | 0.0346      | 30.97727     | 13.10603     | 0.5202  |
| 3      | 5.240         | BV   | 0.0324      | 123.60563    | 59.16384     | 2.0758  |
| 4      | 5.321         | VV   | 0.0536      | 5735.92188   | 1607.23230   | 96.3262 |
| 5      | 5.479         | VB   | 0.0357      | 10.29071     | 4.26195      | 0.1728  |
| 6      | 5.665         | BB   | 0.0448      | 11.20796     | 3.41772      | 0.1882  |
| 7      | 5.933         | VB   | 0.1189      | 11.36069     | 1.14377      | 0.1908  |

Totals : 5954.68520 1693.53758

=====  
\*\*\* End of Report \*\*\*

=====  
Acq. Operator : SYSTEM  
Acq. Instrument : HPLC-Solaja Location : Vial 85  
Injection Date : 2/28/2014 10:02:20 AM Inj Volume : 5.000 µl  
Acq. Method : C:\CHEM32\1\METHODS\METODA 25.M  
Last changed : 2/28/2014 10:01:03 AM by SYSTEM  
(modified after loading)  
Analysis Method : C:\CHEM32\1\METHODS\PRANJE.M  
Last changed : 9/18/2013 2:53:53 PM by SYSTEM  
=====

DAD1 B, Sig=330,4 Ref=off (HINOLINSKI\MV30 2014-02-28 10-01-10.D)

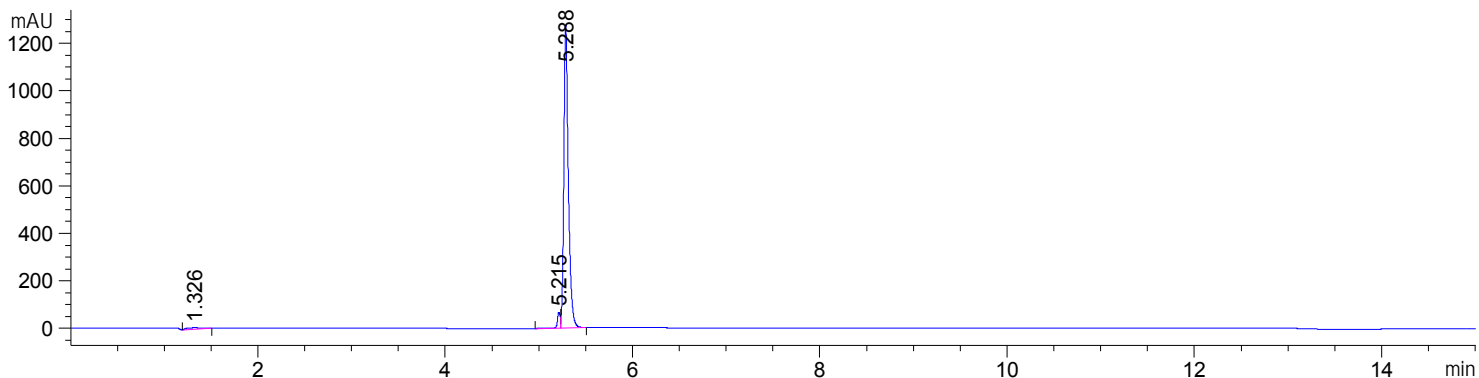

=====  
Fraction Information  
=====

No Fractions found.  
=====

=====  
Area Percent Report  
=====

Sorted By : Signal  
Multiplier : 1.0000  
Dilution : 1.0000  
Use Multiplier & Dilution Factor with ISTDs

Signal 2: DAD1 B, Sig=330,4 Ref=off

| Peak # | RetTime [min] | Type | Width [min] | Area [mAU*s] | Height [mAU] | Area %  |
|--------|---------------|------|-------------|--------------|--------------|---------|
| 1      | 1.326         | BB   | 0.1329      | 70.05448     | 6.49267      | 1.5604  |
| 2      | 5.215         | BV   | 0.0298      | 133.64371    | 66.92734     | 2.9768  |
| 3      | 5.288         | VB   | 0.0492      | 4285.82715   | 1276.07971   | 95.4628 |

Totals : 4489.52534 1349.49972

=====  
\*\*\* End of Report \*\*\*  
=====

```

=====
Acq. Operator   : SYSTEM
Acq. Instrument : HPLC-Solaja           Location : Vial 21
Injection Date  : 2/28/2014 9:17:02 AM
                                           Inj Volume : 2.000 µl

Acq. Method     : C:\CHEM32\1\METHODS\METODA 25.M
Last changed    : 2/28/2014 9:12:27 AM by SYSTEM
                  (modified after loading)

Analysis Method  : C:\CHEM32\1\METHODS\PRANJE.M
Last changed    : 9/18/2013 2:53:53 PM by SYSTEM
  
```

DAD1 B, Sig=330,4 Ref=off (HINOLINSKI\JK05 2014-02-28 09-15-51.D)

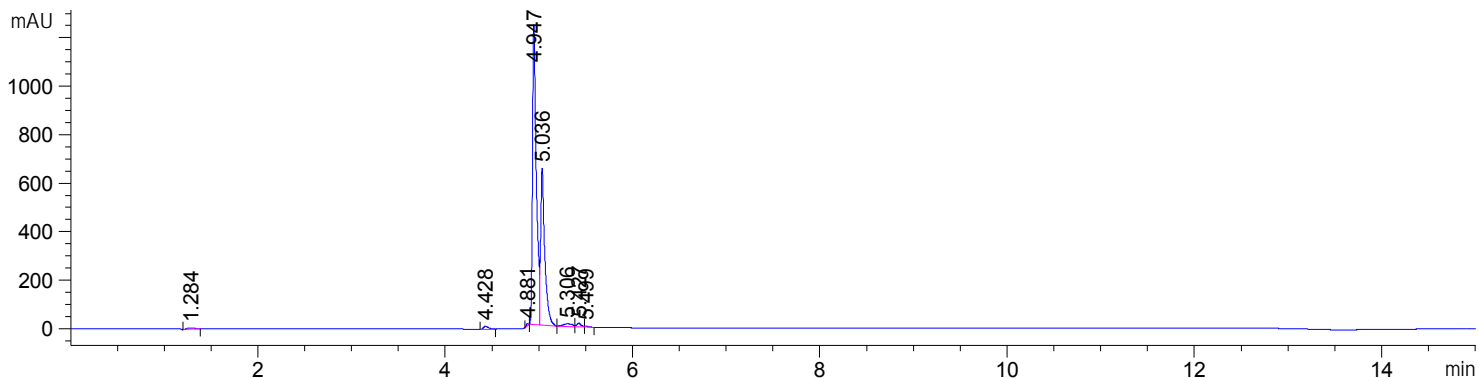

Fraction Information

No Fractions found.

Area Percent Report

```

Sorted By      : Signal
Multiplier     : 1.0000
Dilution       : 1.0000
se Multiplier & Dilution Factor with ISTDs
  
```

Signal 2: DAD1 B, Sig=330,4 Ref=off

| Peak # | RetTime [min] | Type | Width [min] | Area [mAU*s] | Height [mAU] | Area %  |
|--------|---------------|------|-------------|--------------|--------------|---------|
| 1      | 1.284         | BB   | 0.0762      | 30.68703     | 5.20760      | 0.5389  |
| 2      | 4.428         | BV   | 0.0558      | 44.56494     | 12.14464     | 0.7826  |
| 3      | 4.881         | BB   | 0.0273      | 14.29690     | 8.65168      | 0.2511  |
| 4      | 4.947         | BV   | 0.0402      | 3469.44141   | 1236.32007   | 60.9227 |
| 5      | 5.036         | VB   | 0.0435      | 2001.60938   | 647.83722    | 35.1479 |
| 6      | 5.306         | BV   | 0.0763      | 75.77526     | 12.75458     | 1.3306  |
| 7      | 5.427         | VV   | 0.0473      | 48.33295     | 14.92499     | 0.8487  |
| 8      | 5.499         | VB   | 0.0419      | 10.11355     | 3.37761      | 0.1776  |

Totals : 5694.82140 1941.21838

\*\*\* End of Report \*\*\*

```

=====
Acq. Operator   : SYSTEM                               Seq. Line :    5
Acq. Instrument : HPLC-Solaja                          Location  : Vial 74
Injection Date  : 2/27/2014 10:31:48 PM              Inj       :    1
                                                    Inj Volume: 2.000 µl
Method          : C:\CHEM32\1\DATA\HINOLINSKI\HINOLINSKI 11 2014-02-27 21-05-38\METODA 25.M (
                  Sequence Method)
Last changed    : 2/27/2014 9:05:38 PM by SYSTEM
  
```

DAD1 B, Sig=330,4 Ref=off (HINOLINSKI\HINOLINSKI 11 2014-02-27 21-05-38\TEST000005.D)

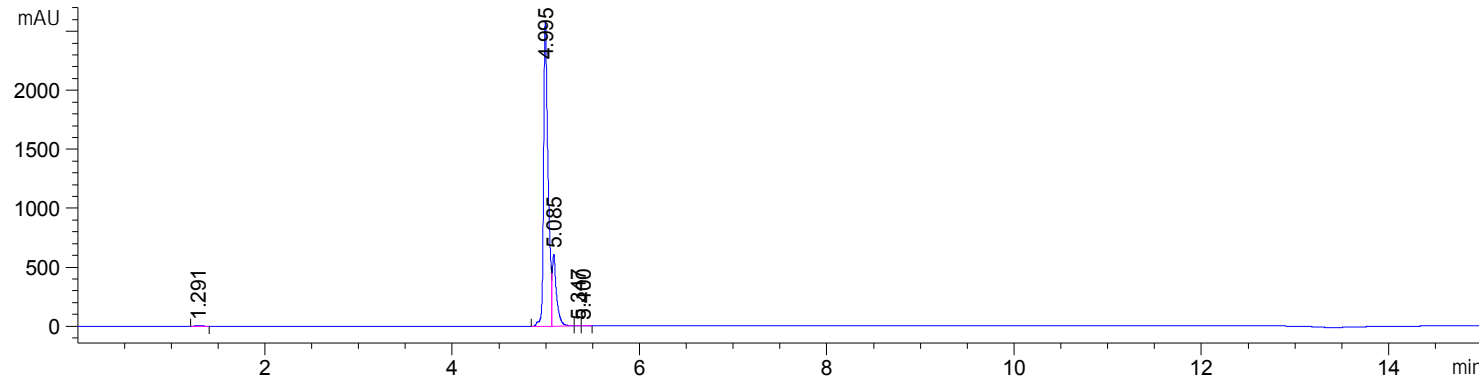

Fraction Information

No Fractions found.

Area Percent Report

```

Sorted By      :      Signal
Multiplier     :      1.0000
Dilution       :      1.0000
Use Multiplier & Dilution Factor with ISTDs
  
```

Signal 2: DAD1 B, Sig=330,4 Ref=off

| Peak # | RetTime [min] | Type | Width [min] | Area [mAU*s] | Height [mAU] | Area %  |
|--------|---------------|------|-------------|--------------|--------------|---------|
| 1      | 1.291         | BB   | 0.0761      | 33.34475     | 5.36028      | 0.3144  |
| 2      | 4.995         | BV   | 0.0488      | 8674.29395   | 2574.86401   | 81.7809 |
| 3      | 5.085         | VV   | 0.0431      | 1884.24561   | 608.60223    | 17.7646 |
| 4      | 5.347         | VV   | 0.0493      | 8.57778      | 2.23154      | 0.0809  |
| 5      | 5.400         | VB   | 0.0514      | 6.29111      | 1.60006      | 0.0593  |

Totals :                      1.06068e4   3192.65812

\*\*\* End of Report \*\*\*

```

=====
Acq. Operator   : SYSTEM                               Seq. Line :    6
Acq. Instrument : HPLC-Solaja                          Location  : Vial 73
Injection Date  : 2/27/2014 10:53:00 PM                Inj       :    1
                                                    Inj Volume: 2.000 µl
Method          : C:\CHEM32\1\DATA\HINOLINSKI\HINOLINSKI 11 2014-02-27 21-05-38\METODA 25.M (
                  Sequence Method)
Last changed    : 2/27/2014 9:05:38 PM by SYSTEM
  
```

DAD1 B, Sig=330,4 Ref=off (HINOLINSKI\HINOLINSKI 11 2014-02-27 21-05-38\TEST000006.D)

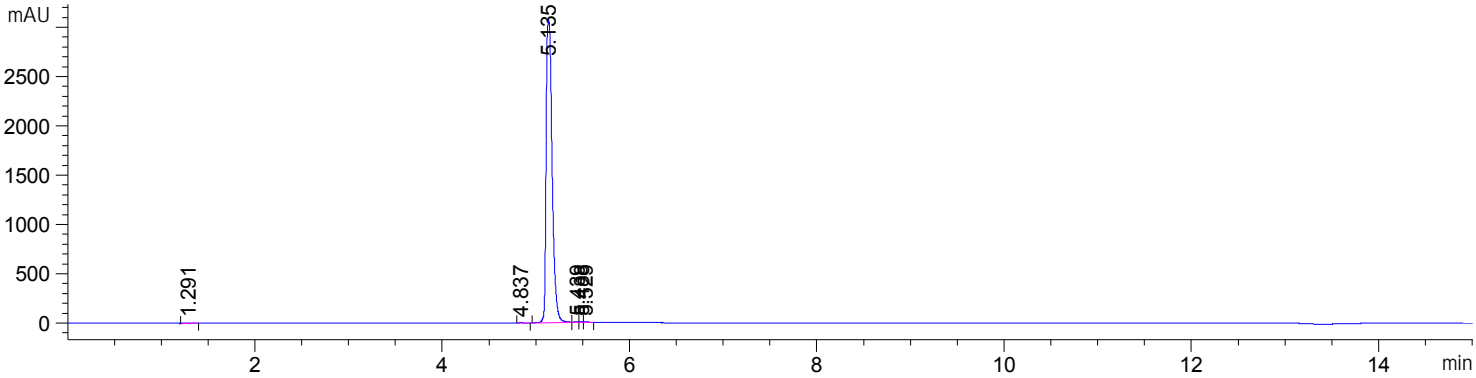

=====  
 Fraction Information  
 =====

No Fractions found.

=====  
 Area Percent Report  
 =====

```

Sorted By      :      Signal
Multiplier     :      1.0000
Dilution       :      1.0000
Use Multiplier & Dilution Factor with ISTDs
  
```

Signal 2: DAD1 B, Sig=330,4 Ref=off

| Peak # | RetTime [min] | Type | Width [min] | Area [mAU*s] | Height [mAU] | Area %  |
|--------|---------------|------|-------------|--------------|--------------|---------|
| 1      | 1.291         | BB   | 0.0843      | 32.10134     | 5.14675      | 0.2346  |
| 2      | 4.837         | BB   | 0.0448      | 16.26962     | 5.09167      | 0.1189  |
| 3      | 5.135         | BB   | 0.0545      | 1.35803e4    | 3076.87012   | 99.2306 |
| 4      | 5.439         | BV   | 0.0365      | 14.59687     | 5.77229      | 0.1067  |
| 5      | 5.488         | VV   | 0.0364      | 16.51150     | 6.66786      | 0.1206  |
| 6      | 5.529         | VB   | 0.0421      | 25.82304     | 8.83148      | 0.1887  |

Totals :                      1.36856e4   3108.38018

=====  
 \*\*\* End of Report \*\*\*



```

=====
Acq. Operator   : SYSTEM                      Seq. Line :    3
Acq. Instrument : HPLC-Solaja                 Location  : Vial 73
Injection Date  : 2/27/2014 9:49:14 PM      Inj       :    1
                                           Inj Volume: 2.000 µl
Method          : C:\CHEM32\1\DATA\HINOLINSKI\HINOLINSKI 11 2014-02-27 21-05-38\METODA 25.M (
                  Sequence Method)
Last changed    : 2/27/2014 9:05:38 PM by SYSTEM
  
```

DAD1 B, Sig=330,4 Ref=off (HINOLINSKI\HINOLINSKI 11 2014-02-27 21-05-38\TEST000003.D)

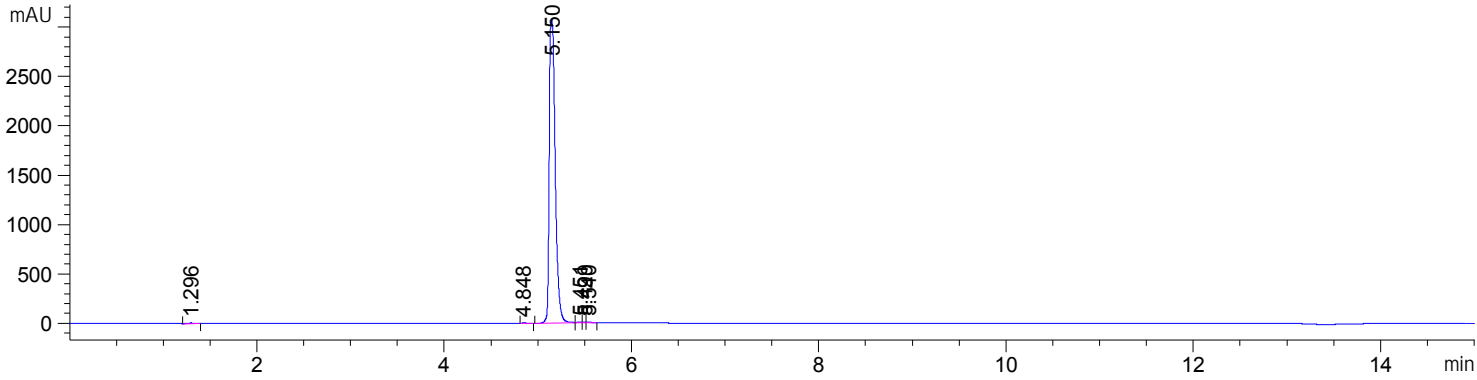

Fraction Information

No Fractions found.

Area Percent Report

```

Sorted By      :      Signal
Multiplier     :      1.0000
Dilution       :      1.0000
Use Multiplier & Dilution Factor with ISTDs
  
```

Signal 2: DAD1 B, Sig=330,4 Ref=off

| Peak # | RetTime [min] | Type | Width [min] | Area [mAU*s] | Height [mAU] | Area %  |
|--------|---------------|------|-------------|--------------|--------------|---------|
| 1      | 1.296         | BB   | 0.0732      | 31.22255     | 5.15455      | 0.2272  |
| 2      | 4.848         | BB   | 0.0475      | 16.73750     | 5.07316      | 0.1218  |
| 3      | 5.150         | BB   | 0.0543      | 1.36351e4    | 3073.64551   | 99.2389 |
| 4      | 5.451         | BV   | 0.0366      | 14.51578     | 5.71865      | 0.1056  |
| 5      | 5.499         | VV   | 0.0346      | 16.28599     | 6.64245      | 0.1185  |
| 6      | 5.540         | VB   | 0.0420      | 25.80930     | 8.72343      | 0.1878  |

Totals : 1.37397e4 3104.95775

\*\*\* End of Report \*\*\*

```

=====
Acq. Operator   : SYSTEM                               Seq. Line :    4
Acq. Instrument : HPLC-Solaja                          Location  : Vial 63
Injection Date  : 2/27/2014 10:10:30 PM                Inj       :    1
                                                    Inj Volume: 2.000 µl
Method          : C:\CHEM32\1\DATA\HINOLINSKI\HINOLINSKI 11 2014-02-27 21-05-38\METODA 25.M (
                  Sequence Method)
Last changed    : 2/27/2014 9:05:38 PM by SYSTEM
DAD1 A, Sig=254,4 Ref=off (HINOLINSKI\HINOLINSKI 11 2014-02-27 21-05-38\TEST000004.D)
  
```

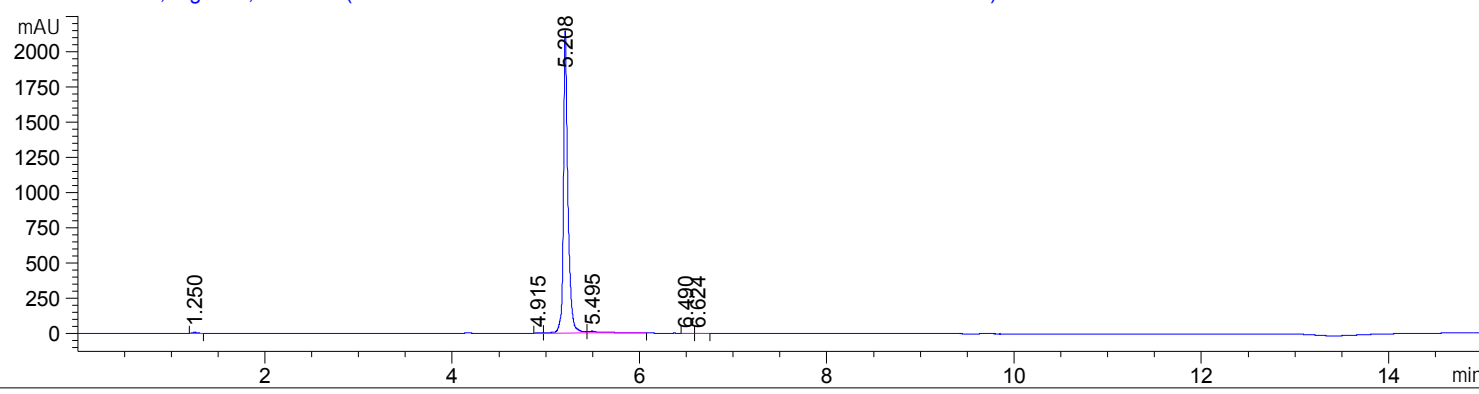

Fraction Information

No Fractions found.

Area Percent Report

```

Sorted By      :      Signal
Multiplier     :      1.0000
Dilution       :      1.0000
Use Multiplier & Dilution Factor with ISTDs
  
```

Signal 1: DAD1 A, Sig=254,4 Ref=off

| Peak # | RetTime [min] | Type | Width [min] | Area [mAU*s] | Height [mAU] | Area %  |
|--------|---------------|------|-------------|--------------|--------------|---------|
| 1      | 1.250         | BB   | 0.0775      | 38.33717     | 8.06219      | 0.5200  |
| 2      | 4.915         | BV   | 0.0549      | 6.66064      | 1.65775      | 0.0903  |
| 3      | 5.208         | VV   | 0.0468      | 7133.92041   | 2146.30713   | 96.7591 |
| 4      | 5.495         | VB   | 0.1583      | 182.20453    | 14.23526     | 2.4713  |
| 5      | 6.490         | VV   | 0.0705      | 6.17663      | 1.08386      | 0.0838  |
| 6      | 6.624         | VB   | 0.0591      | 5.56605      | 1.24736      | 0.0755  |

Totals : 7372.86544 2172.59354

\*\*\* End of Report \*\*\*

=====  
Acq. Operator : SYSTEM Seq. Line : 7  
Acq. Instrument : HPLC-Solaja Location : Vial 72  
Injection Date : 2/27/2014 11:14:09 PM Inj : 1  
Inj Volume : 2.000 µl  
Method : C:\CHEM32\1\DATA\HINOLINSKI\HINOLINSKI 11 2014-02-27 21-05-38\METODA 25.M ( Sequence Method)  
Last changed : 2/27/2014 9:05:38 PM by SYSTEM

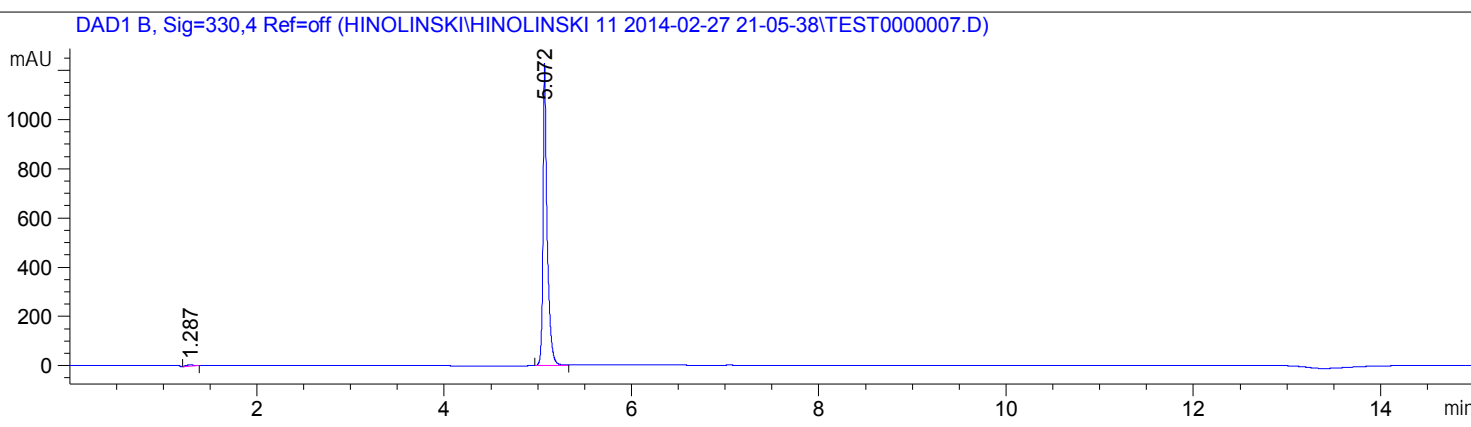

=====  
Fraction Information  
=====

No Fractions found.

=====  
Area Percent Report  
=====

Sorted By : Signal  
Multiplier : 1.0000  
Dilution : 1.0000  
Use Multiplier & Dilution Factor with ISTDs

Signal 2: DAD1 B, Sig=330,4 Ref=off

| Peak # | RetTime [min] | Type | Width [min] | Area [mAU*s] | Height [mAU] | Area %  |
|--------|---------------|------|-------------|--------------|--------------|---------|
| 1      | 1.287         | BB   | 0.0899      | 30.25244     | 5.05081      | 0.7935  |
| 2      | 5.072         | BV   | 0.0435      | 3782.41846   | 1227.06824   | 99.2065 |

Totals : 3812.67089 1232.11905

=====  
\*\*\* End of Report \*\*\*

```

=====
Acq. Operator   : SYSTEM
Acq. Instrument : HPLC-Solaja           Location : Vial 75
Injection Date  : 2/28/2014 8:35:00 AM
                                           Inj Volume : 5.000 µl

Acq. Method     : C:\CHEM32\1\METHODS\METODA 25.M
Last changed    : 2/28/2014 8:35:51 AM by SYSTEM
                  (modified after loading)

Analysis Method  : C:\CHEM32\1\METHODS\PRANJE.M
Last changed    : 9/18/2013 2:53:53 PM by SYSTEM
=====

```

DAD1 B, Sig=330,4 Ref=off (HINOLINSKI\DOZS18 2014-02-28 08-33-43.D)

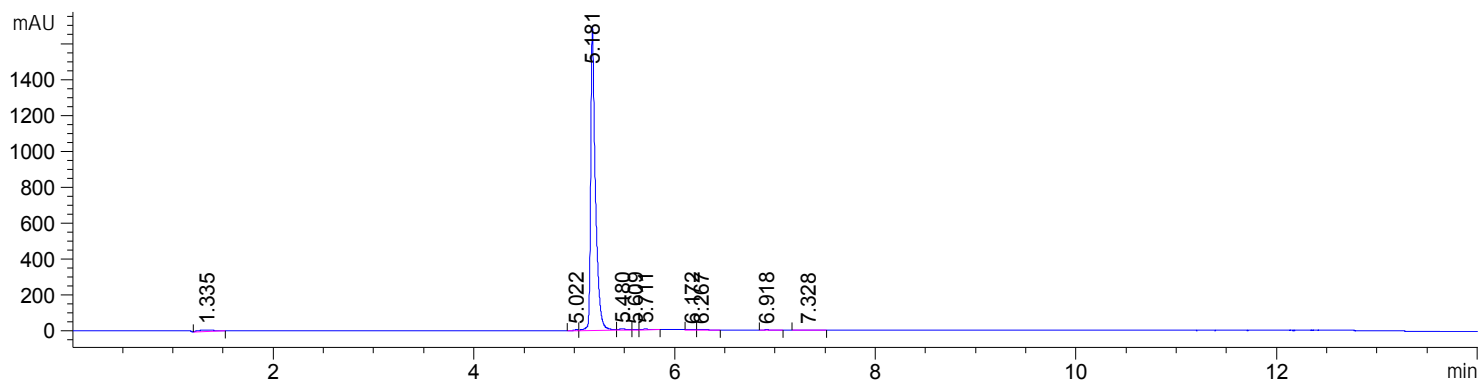

```

=====
Fraction Information
=====

```

```

=====
No Fractions found.
=====

```

```

=====
Area Percent Report
=====

```

```

Sorted By      :      Signal
Multiplier     :      1.0000
Dilution       :      1.0000
Use Multiplier & Dilution Factor with ISTDs

```

Signal 2: DAD1 B, Sig=330,4 Ref=off

| Peak # | RetTime [min] | Type | Width [min] | Area [mAU*s] | Height [mAU] | Area %  |
|--------|---------------|------|-------------|--------------|--------------|---------|
| 1      | 1.335         | BB   | 0.1327      | 75.52184     | 7.03539      | 1.3104  |
| 2      | 5.022         | BV   | 0.0386      | 11.59436     | 4.34548      | 0.2012  |
| 3      | 5.181         | VV   | 0.0463      | 5550.89209   | 1691.44263   | 96.3123 |
| 4      | 5.480         | VV   | 0.0821      | 41.15622     | 6.85275      | 0.7141  |
| 5      | 5.609         | VV   | 0.0464      | 9.74525      | 2.67977      | 0.1691  |
| 6      | 5.711         | VB   | 0.0670      | 24.94572     | 4.93526      | 0.4328  |
| 7      | 6.172         | VV   | 0.0567      | 5.22887      | 1.11552      | 0.0907  |
| 8      | 6.267         | VB   | 0.0753      | 18.34690     | 3.25498      | 0.3183  |
| 9      | 6.918         | BB   | 0.0556      | 13.23581     | 3.66509      | 0.2297  |
| 10     | 7.328         | BB   | 0.0749      | 12.76073     | 2.17729      | 0.2214  |

```
Totals :                5763.42779 1727.50416
```

```

=====
*** End of Report ***

```

**Compound 13 (DR06):**  $^1\text{H}$  NMR spectrum (500 MHz). HPLC purity: method A: RT 2.092, area 98.69 %; method B: RT 8.698, area 95.46 %.

2/26/2014 11:33:48 AM

| Number of Nuclei 0 H's |                                                                                                                              |                   |                      |                        |                      |
|------------------------|------------------------------------------------------------------------------------------------------------------------------|-------------------|----------------------|------------------------|----------------------|
| Acquisition Time (sec) | 3.1195                                                                                                                       | Date              | 22 May 2009 10:53:20 | Date Stamp             | 22 May 2009 10:53:20 |
| File Name              | C:\Users\Dejan\Openical\Documents\Radovi\Aminohinoliniski\DO152\i\ostali\Recenzija\Spektri NMR_Ostalo\DR06\DR06\1\pdata\111r |                   |                      |                        |                      |
| Frequency (MHz)        | 500.26                                                                                                                       | Nucleus           | $^1\text{H}$         | Number of Transients   | 16                   |
| Original Points Count  | 16384                                                                                                                        | Owner             | nmsu                 | Points Count           | 32768                |
| Receiver Gain          | 80.60                                                                                                                        | SW(cyclical) (Hz) | 5252.10              | Solvent                | CHLOROFORM-d         |
| Spectrum Type          | STANDARD                                                                                                                     | Sweep Width (Hz)  | 5251.94              | Temperature (degree C) | 25.000               |
|                        |                                                                                                                              |                   |                      | Pulse Sequence         | zg30                 |
|                        |                                                                                                                              |                   |                      | Spectrum Offset (Hz)   | 2132.0439            |

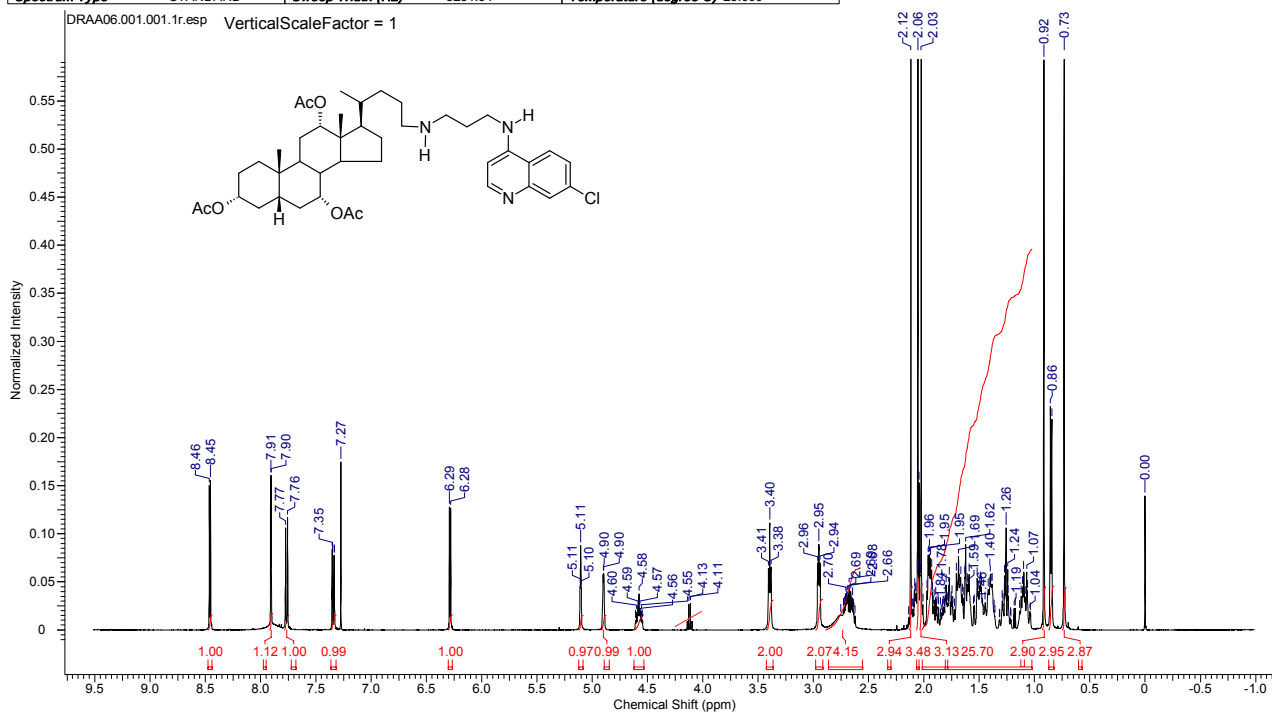

**Compound 13 (DR06):**  $^{13}\text{C}$  NMR spectrum (125 MHz).

2/26/2014 11:38:43 AM

| Number of Nuclei 0 C's |                                                                                                                              |                   |                      |                        |                      |
|------------------------|------------------------------------------------------------------------------------------------------------------------------|-------------------|----------------------|------------------------|----------------------|
| Acquisition Time (sec) | 0.5505                                                                                                                       | Date              | 22 May 2009 11:06:08 | Date Stamp             | 22 May 2009 11:06:08 |
| File Name              | C:\Users\Dejan\Openical\Documents\Radovi\Aminohinoliniski\DO152\i\ostali\Recenzija\Spektri NMR_Ostalo\DR06\DR06\2\pdata\111r |                   |                      |                        |                      |
| Frequency (MHz)        | 125.79                                                                                                                       | Nucleus           | $^{13}\text{C}$      | Number of Transients   | 516                  |
| Original Points Count  | 16384                                                                                                                        | Owner             | nmsu                 | Points Count           | 32768                |
| Receiver Gain          | 2050.00                                                                                                                      | SW(cyclical) (Hz) | 29761.90             | Solvent                | CHLOROFORM-d         |
| Spectrum Type          | STANDARD                                                                                                                     | Sweep Width (Hz)  | 29761.00             | Temperature (degree C) | 25.000               |
|                        |                                                                                                                              |                   |                      | Pulse Sequence         | zgpg30               |
|                        |                                                                                                                              |                   |                      | Spectrum Offset (Hz)   | 13830.7002           |

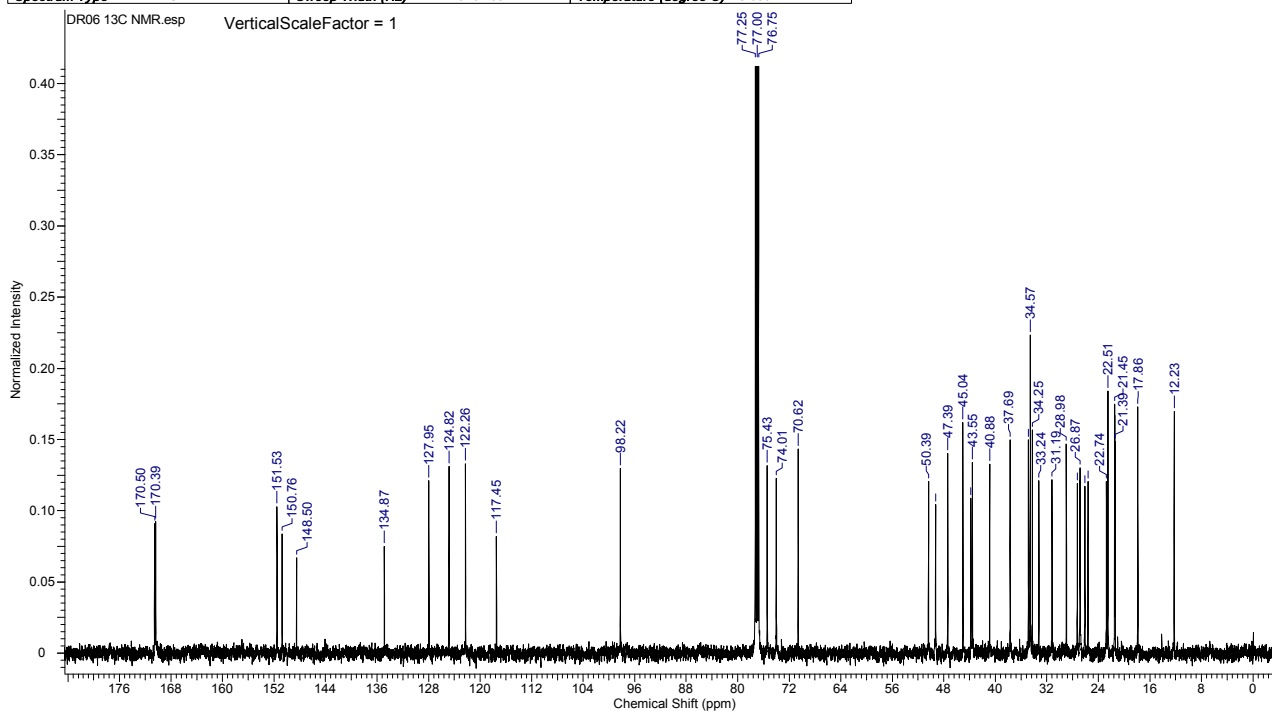



**Compound 15 (DOJK06):**  $^1\text{H}$  NMR spectrum (500 MHz). HPLC purity: method A: RT 1.971, area 99.39 %; method C: RT 11.700, area 95.41 %.

2/26/2014 3:48:05 PM

| Number of Nuclei 0 H's |                                                                                                                           |                   |                      |                        |                      |
|------------------------|---------------------------------------------------------------------------------------------------------------------------|-------------------|----------------------|------------------------|----------------------|
| Acquisition Time (sec) | 3.4669                                                                                                                    | Date              | 22 Mar 2011 15:58:08 | Date Stamp             | 22 Mar 2011 15:58:08 |
| File Name              | C:\Users\Dejan Ospenica\Documents\Radovi\Aminohinoliniski\DO152 i ostali\Recenzija\Spektri NMR_Ostalo\DOJK06.1\pdata\111r |                   |                      |                        |                      |
| Frequency (MHz)        | 500.26                                                                                                                    | Nucleus           | $^1\text{H}$         | Number of Transients   | 16                   |
| Original Points Count  | 16384                                                                                                                     | Owner             | nmrsu                | Points Count           | 32768                |
| Receiver Gain          | 101.00                                                                                                                    | SW(cyclical) (Hz) | 4725.90              | Solvent                | CHLOROFORM-d         |
| Spectrum Offset (Hz)   | 2200.9209                                                                                                                 | Spectrum Type     | STANDARD             | Sweep Width (Hz)       | 4725.75              |
|                        |                                                                                                                           |                   |                      | Temperature (degree C) | 25.000               |

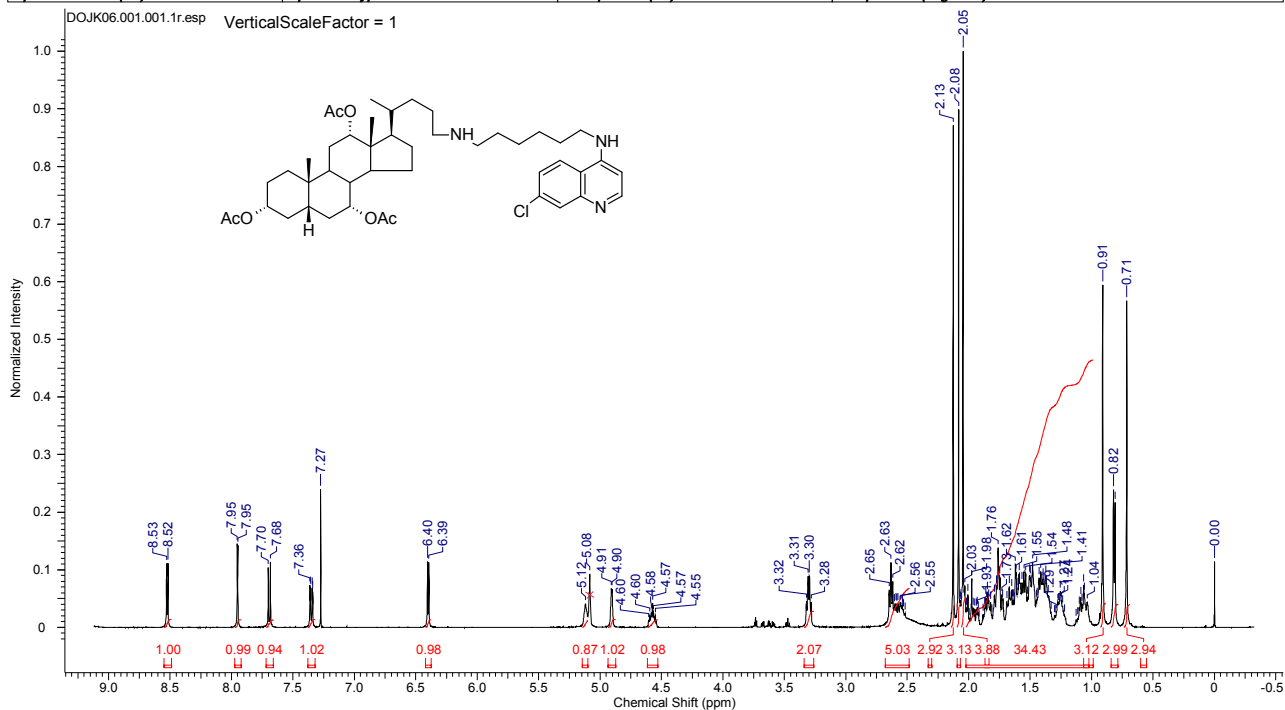

**Compound 15 (DOJK06):**  $^{13}\text{C}$  NMR spectrum (125 MHz).

2/26/2014 3:50:16 PM

| Number of Nuclei 0 C's |                                                                                                                           |                   |                      |                        |                      |
|------------------------|---------------------------------------------------------------------------------------------------------------------------|-------------------|----------------------|------------------------|----------------------|
| Acquisition Time (sec) | 0.5505                                                                                                                    | Date              | 22 Mar 2011 16:00:16 | Date Stamp             | 22 Mar 2011 16:00:16 |
| File Name              | C:\Users\Dejan Ospenica\Documents\Radovi\Aminohinoliniski\DO152 i ostali\Recenzija\Spektri NMR_Ostalo\DOJK06.2\pdata\111r |                   |                      |                        |                      |
| Frequency (MHz)        | 125.79                                                                                                                    | Nucleus           | $^{13}\text{C}$      | Number of Transients   | 269                  |
| Original Points Count  | 16384                                                                                                                     | Owner             | nmrsu                | Points Count           | 32768                |
| Receiver Gain          | 724.00                                                                                                                    | SW(cyclical) (Hz) | 29761.90             | Solvent                | CHLOROFORM-d         |
| Spectrum Type          | STANDARD                                                                                                                  | Sweep Width (Hz)  | 29761.00             | Temperature (degree C) | 25.200               |
|                        |                                                                                                                           |                   |                      | Spectrum Offset (Hz)   | 13831.0020           |

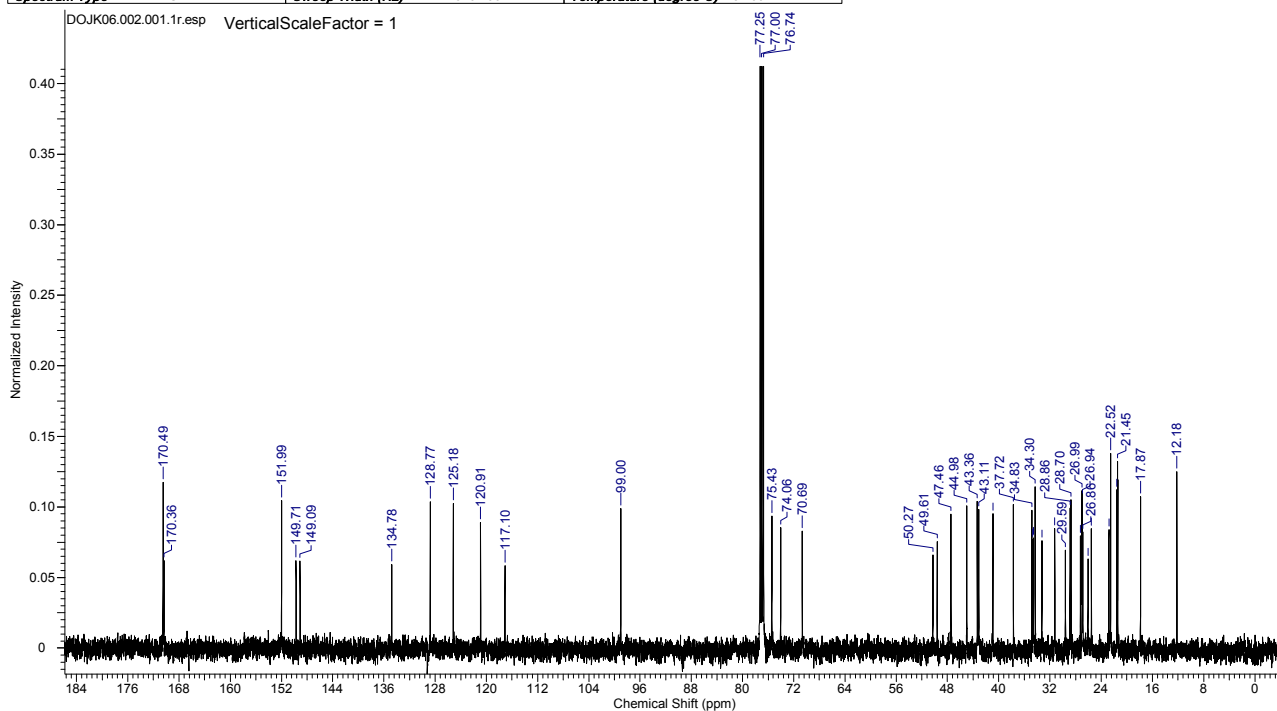

**Compound 16 (DO183):  $^1\text{H}$  NMR spectrum (500 MHz).** HPLC purity: method A: RT 8.651, area 96.19 %; method B: RT 8.626, area 95.11 %

2/26/2014 3:53:39 PM

| Number of Nuclei 0 H's |                                                                                                                                |                   |                      |                        |              |                      |           |
|------------------------|--------------------------------------------------------------------------------------------------------------------------------|-------------------|----------------------|------------------------|--------------|----------------------|-----------|
| Acquisition Time (sec) | 2.7525                                                                                                                         | Date              | 28 Apr 2008 10:40:32 |                        |              |                      |           |
| File Name              | C:\Users\Dejan Osenica\Documents\Radovi\Aminohinoliniski\DO152 i ostali\Recenzija\Spektri NMR_Ostalo\DO183\MMAA02111\pdata\11r |                   | Date Stamp           | 28 Apr 2008 10:40:32   |              |                      |           |
| Frequency (MHz)        | 500.26                                                                                                                         | Nucleus           | $^1\text{H}$         | Number of Transients   | 1            | Origin               | spect     |
| Original Points Count  | 16384                                                                                                                          | Owner             | nmsru                | Points Count           | 16384        | Pulse Sequence       | zq30      |
| Receiver Gain          | 45.20                                                                                                                          | SW(cyclical) (Hz) | 5952.38              | Solvent                | CHLOROFORM-d | Spectrum Offset (Hz) | 2502.6123 |
| Spectrum Type          | STANDARD                                                                                                                       | Sweep Width (Hz)  | 5952.02              | Temperature (degree C) | 24.900       |                      |           |

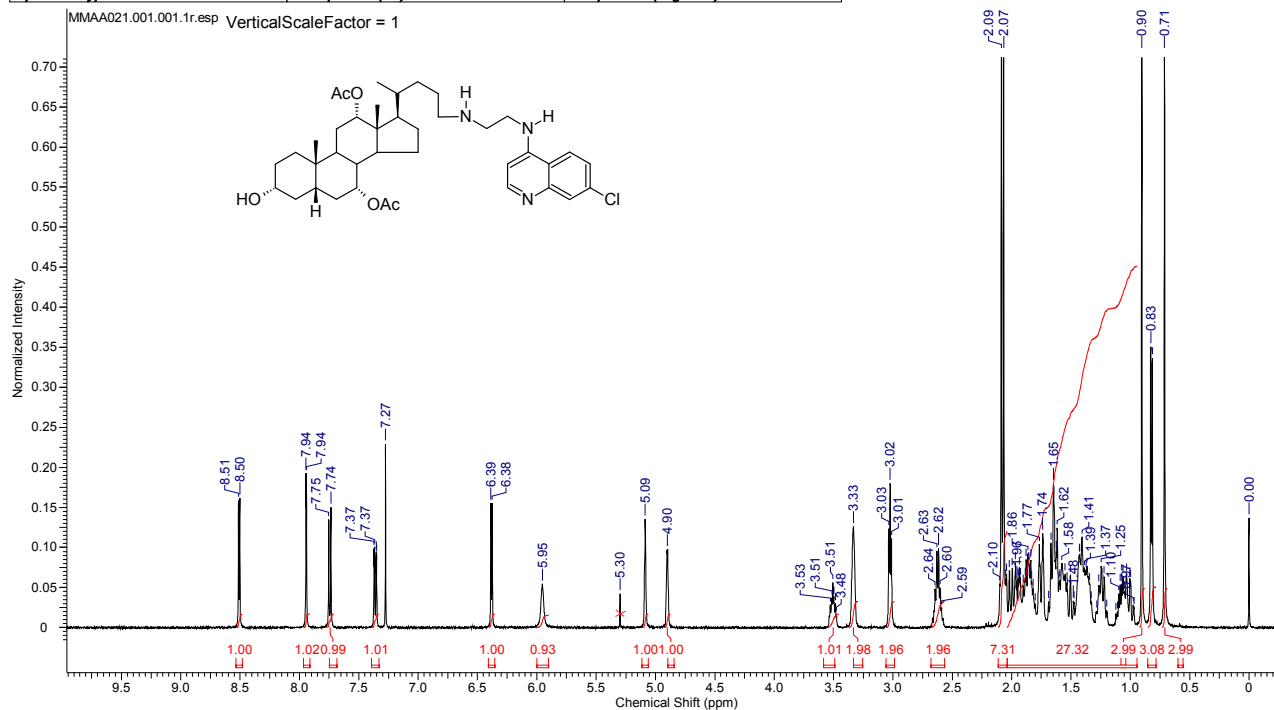

**Compound 16 (DO183):  $^{13}\text{C}$  NMR spectrum (125 MHz).**

3/2/2014 11:51:50 AM

| Number of Nuclei 0 C's |                                                                                                                                |                   |                      |                        |              |                      |            |
|------------------------|--------------------------------------------------------------------------------------------------------------------------------|-------------------|----------------------|------------------------|--------------|----------------------|------------|
| Acquisition Time (sec) | 1.1010                                                                                                                         | Date              | 28 Apr 2008 10:51:12 |                        |              |                      |            |
| File Name              | C:\Users\Dejan Osenica\Documents\Radovi\Aminohinoliniski\DO152 i ostali\Recenzija\Spektri NMR_Ostalo\DO183\MMAA02112\pdata\21r |                   | Date Stamp           | 28 Apr 2008 10:51:12   |              |                      |            |
| Frequency (MHz)        | 125.79                                                                                                                         | Nucleus           | $^{13}\text{C}$      | Number of Transients   | 2611         | Origin               | spect      |
| Original Points Count  | 32768                                                                                                                          | Owner             | nmsru                | Points Count           | 32768        | Pulse Sequence       | zpgg30     |
| Receiver Gain          | 203.00                                                                                                                         | SW(cyclical) (Hz) | 29761.90             | Solvent                | CHLOROFORM-d | Spectrum Offset (Hz) | 13831.6260 |
| Spectrum Type          | STANDARD                                                                                                                       | Sweep Width (Hz)  | 29761.00             | Temperature (degree C) | 25.000       |                      |            |

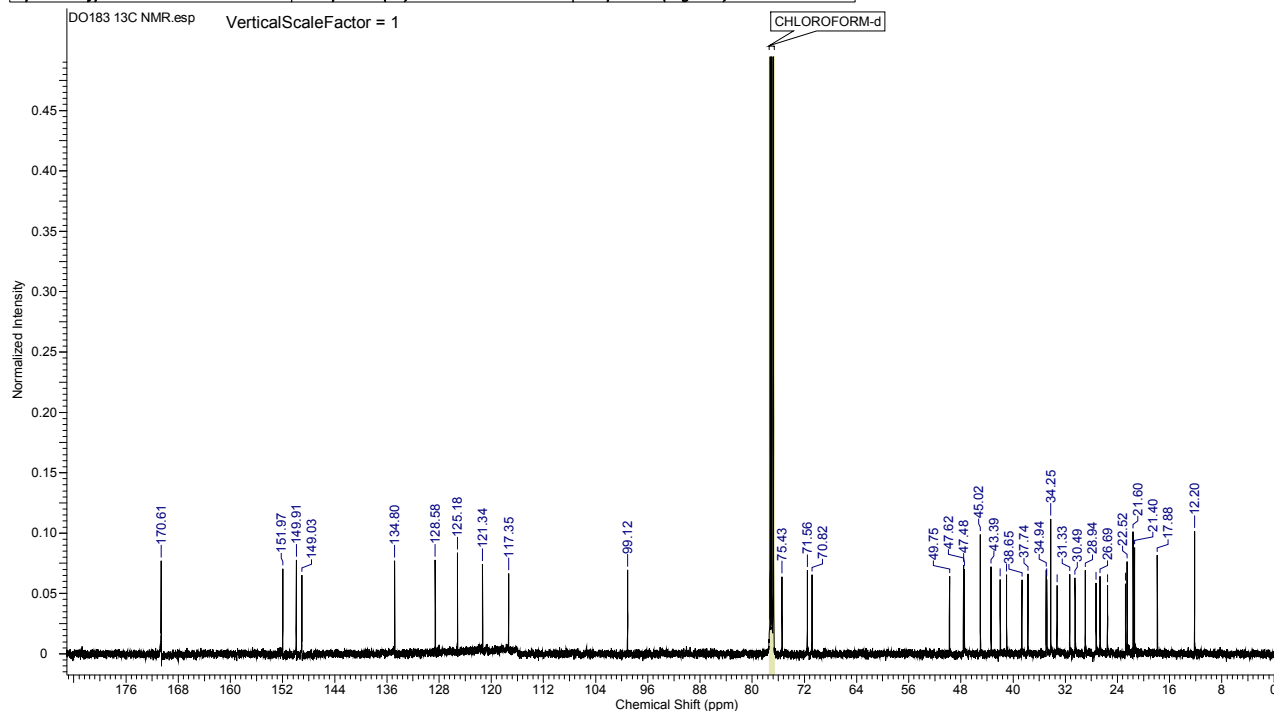



**Compound 17 (DR07):  $^1\text{H}$  NMR spectrum (200 MHz):** HPLC purity: method B: RT 8.583, area 95.71 %; method C: RT 13.187, area 95.02 %.

2/25/2014 11:26:24 AM

| Number of Nuclei 0 H's |                                                                                                                                   |                |              |                        |                     |
|------------------------|-----------------------------------------------------------------------------------------------------------------------------------|----------------|--------------|------------------------|---------------------|
| Acquisition Time (sec) | 1.4400                                                                                                                            | Comment        | DRAA007      | Date                   | May 25 09           |
| File Name              | C:\Users\Dejan Oспенica\Documents\Radovi\Aminohinoliniski\DO152\ostali\Recenzijal\Spektri NMR_Staril200 MHz\DR07\hdraa007.fid\fid |                |              |                        |                     |
| Frequency (MHz)        | 199.97                                                                                                                            | Nucleus        | $^1\text{H}$ | Number of Transients   | 32                  |
| Points Count           | 8192                                                                                                                              | Pulse Sequence | s2pul        | Receiver Gain          | 5.00                |
| Spectrum Offset (Hz)   | 1687.8647                                                                                                                         | Spectrum Type  | STANDARD     | Sweep Width (Hz)       | 4600.00             |
|                        |                                                                                                                                   |                |              | Solvent                | CHLOROFORM-d        |
|                        |                                                                                                                                   |                |              | Temperature (degree C) | AMBIENT TEMPERATURE |

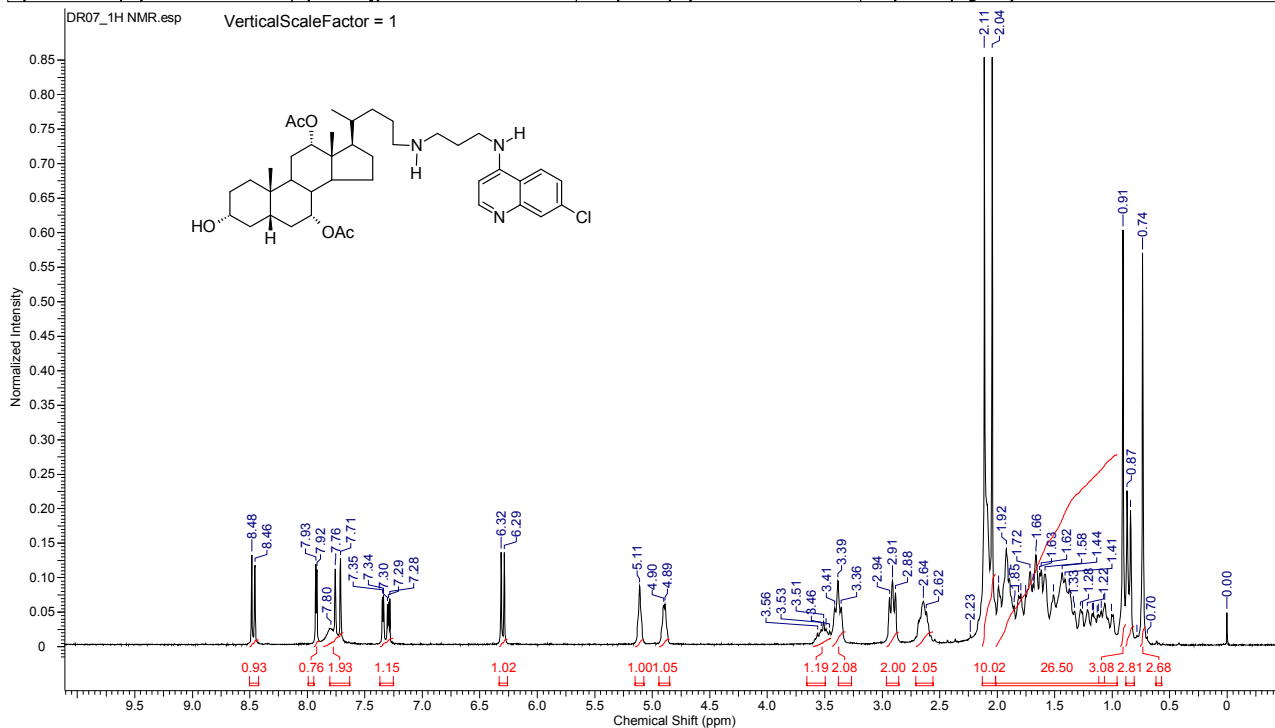

**Compound 17 (DR07):  $^{13}\text{C}$  NMR spectrum (50 MHz)**

3/2/2014 12:02:21 PM

| Number of Nuclei 0 C's |                                                                                                                                   |                |                 |                        |                     |
|------------------------|-----------------------------------------------------------------------------------------------------------------------------------|----------------|-----------------|------------------------|---------------------|
| Acquisition Time (sec) | 1.0667                                                                                                                            | Comment        | DRAA007         | Date                   | May 25 09           |
| File Name              | C:\Users\Dejan Oспенica\Documents\Radovi\Aminohinoliniski\DO152\ostali\Recenzijal\Spektri NMR_Staril200 MHz\DR07\cdraa007.fid\fid |                |                 |                        |                     |
| Frequency (MHz)        | 50.29                                                                                                                             | Nucleus        | $^{13}\text{C}$ | Number of Transients   | 803                 |
| Points Count           | 16384                                                                                                                             | Pulse Sequence | s2pul           | Receiver Gain          | 25.00               |
| Spectrum Offset (Hz)   | 4813.8223                                                                                                                         | Spectrum Type  | STANDARD        | Sweep Width (Hz)       | 15000.00            |
|                        |                                                                                                                                   |                |                 | Solvent                | CHLOROFORM-d        |
|                        |                                                                                                                                   |                |                 | Temperature (degree C) | AMBIENT TEMPERATURE |

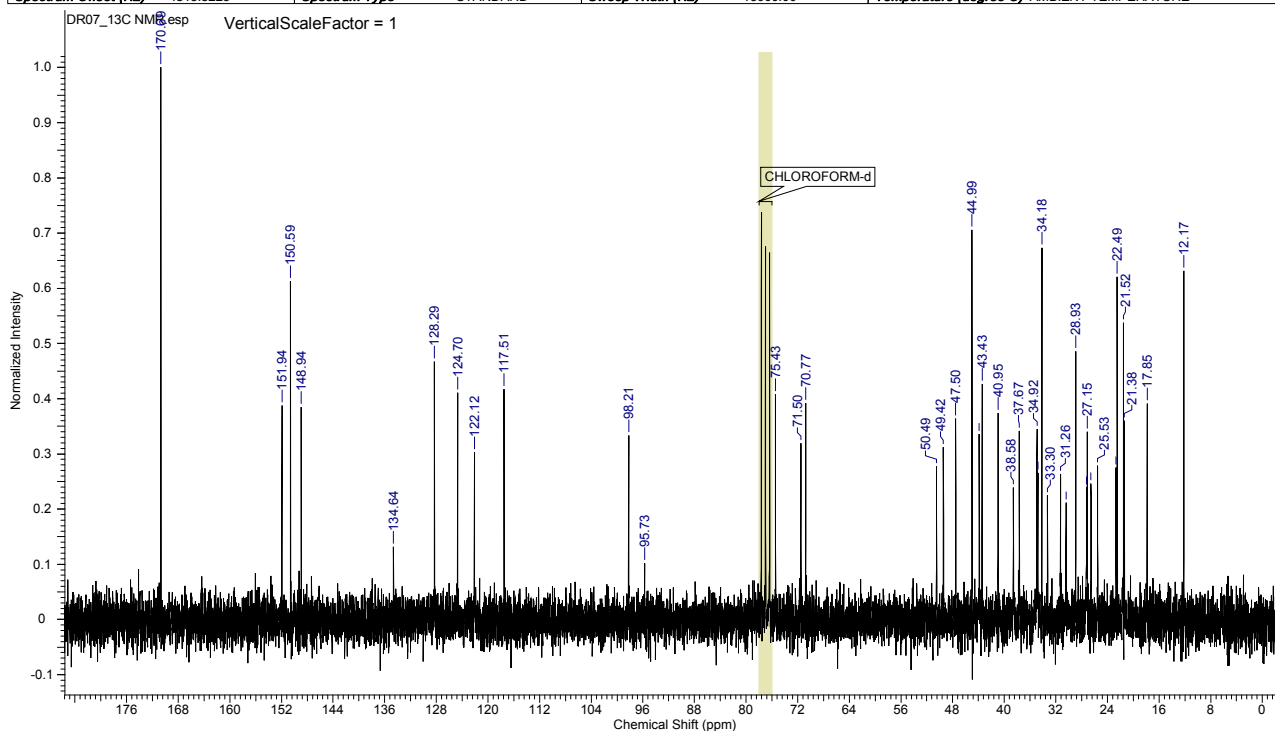

Compound 17 (DR07): <sup>1</sup>H NMR spectrum (500 MHz)

2/25/2014 11:37:54 AM

| Number of Nuclei 0 H's |                                                                                                                             |                   |                      |                        |              |                      |           |
|------------------------|-----------------------------------------------------------------------------------------------------------------------------|-------------------|----------------------|------------------------|--------------|----------------------|-----------|
| Acquisition Time (sec) | 3.5914                                                                                                                      | Date              | 22 Mar 2011 16:23:44 |                        |              |                      |           |
| File Name              | C:\Users\Dejan Ospenica\Documents\Radovi\Aminohinolinski\DO152 i ostali\Recenzija\Spektri NMR_ Stari\500 MHz\MV861\data\11r |                   | Date Stamp           | 22 Mar 2011 16:23:44   |              |                      |           |
| Frequency (MHz)        | 500.26                                                                                                                      | Nucleus           | <sup>1</sup> H       | Number of Transients   | 13           | Origin               | spect     |
| Original Points Count  | 16384                                                                                                                       | Owner             | nmrsu                | Points Count           | 32768        | Pulse Sequence       | zq30      |
| Receiver Gain          | 101.00                                                                                                                      | SW(cyclical) (Hz) | 4562.04              | Solvent                | CHLOROFORM-d | Spectrum Offset (Hz) | 2052.5569 |
| Spectrum Type          | STANDARD                                                                                                                    | Sweep Width (Hz)  | 4561.90              | Temperature (degree C) | 25.000       |                      |           |

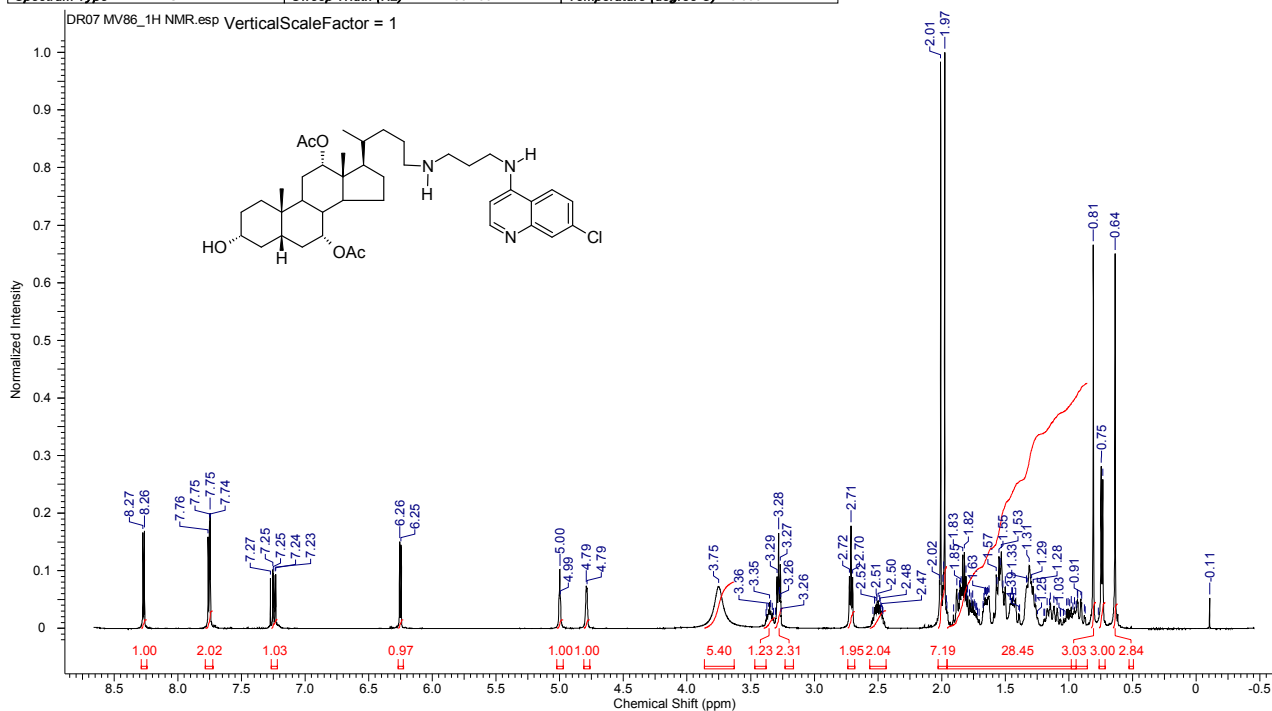Compound 17 (DR07): <sup>13</sup>C NMR spectrum (125 MHz)

2/25/2014 11:38:55 AM

| Number of Nuclei 0 C's |                                                                                                                             |                   |                      |                        |              |                      |            |
|------------------------|-----------------------------------------------------------------------------------------------------------------------------|-------------------|----------------------|------------------------|--------------|----------------------|------------|
| Acquisition Time (sec) | 0.5505                                                                                                                      | Date              | 22 Mar 2011 16:28:00 |                        |              |                      |            |
| File Name              | C:\Users\Dejan Ospenica\Documents\Radovi\Aminohinolinski\DO152 i ostali\Recenzija\Spektri NMR_ Stari\500 MHz\MV862\data\11r |                   | Date Stamp           | 22 Mar 2011 16:28:00   |              |                      |            |
| Frequency (MHz)        | 125.79                                                                                                                      | Nucleus           | <sup>13</sup> C      | Number of Transients   | 293          | Origin               | spect      |
| Original Points Count  | 16384                                                                                                                       | Owner             | nmrsu                | Points Count           | 32768        | Pulse Sequence       | zpgp30     |
| Receiver Gain          | 724.00                                                                                                                      | SW(cyclical) (Hz) | 29761.90             | Solvent                | CHLOROFORM-d | Spectrum Offset (Hz) | 13819.6709 |
| Spectrum Type          | STANDARD                                                                                                                    | Sweep Width (Hz)  | 29761.00             | Temperature (degree C) | 25.000       |                      |            |

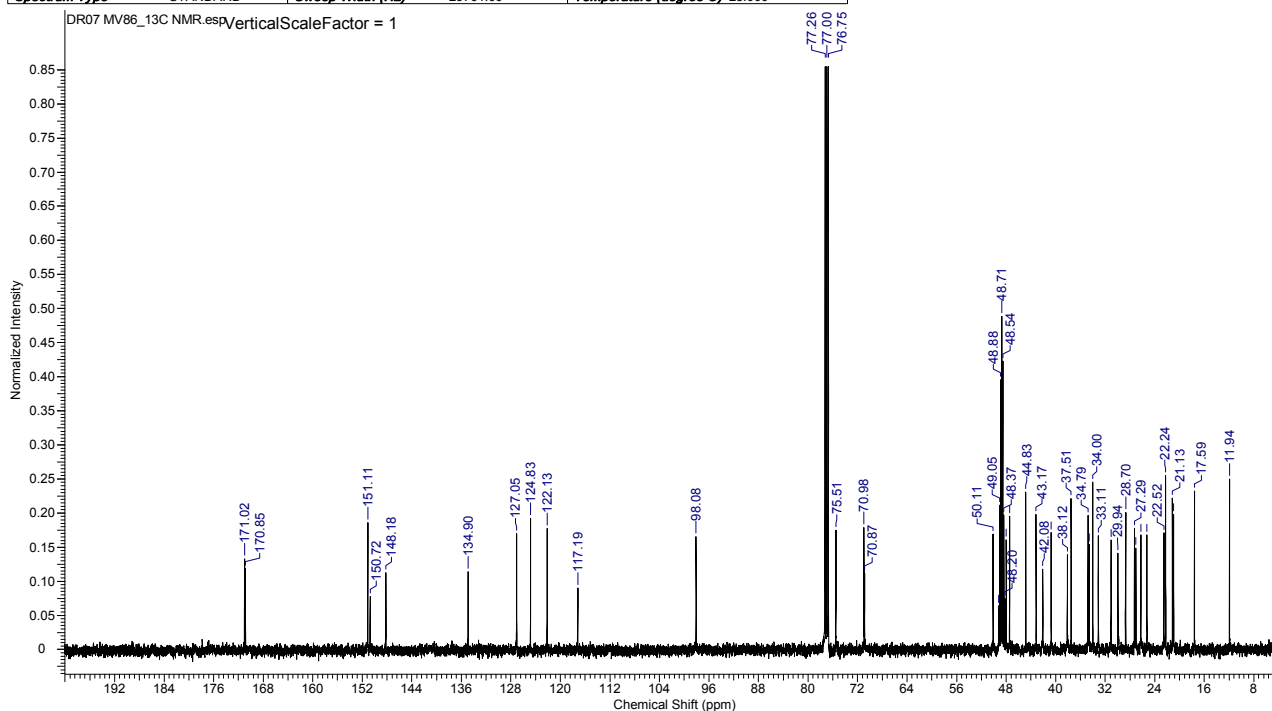

**Compound 18 (DOZS12):  $^1\text{H}$  NMR spectrum (500 MHz):** HPLC purity: method A: RT 1.879, area 99.04 %; method D: RT 5.495, area 97.05 %.

2/25/2014 11:51:41 AM

| Number of Nuclei 0 H's |                                                                                                                           |                        |                                   |                      |
|------------------------|---------------------------------------------------------------------------------------------------------------------------|------------------------|-----------------------------------|----------------------|
| Acquisition Time (sec) | 2.1823                                                                                                                    | Comment                | 5 mm BBO BB-1H/D Z-GRD Z8007/0118 |                      |
| Date Stamp             | 22 Feb 2014 10:40:16                                                                                                      |                        | Date                              | 22 Feb 2014 10:40:16 |
| File Name              | C:\Users\Dejan Ospenica\Documents\Radovi\Aminohinoliniski\DO152\ostali\Recenzija\Spektri NMR novidozs12-nov\1\1\data\1\1r |                        |                                   |                      |
| Frequency (MHz)        | 500.26                                                                                                                    | Nucleus                | $^1\text{H}$                      |                      |
| Original Points Count  | 16384                                                                                                                     | Owner                  | nmrsu                             |                      |
| Receiver Gain          | 362.00                                                                                                                    | SW(cyclical) (Hz)      | 7507.51                           |                      |
| Spectrum Type          | STANDARD                                                                                                                  | Sweep Width (Hz)       | 7507.28                           |                      |
|                        |                                                                                                                           | Number of Transients   | 22                                |                      |
|                        |                                                                                                                           | Points Count           | 32768                             |                      |
|                        |                                                                                                                           | Solvent                | CHLOROFORM-d                      |                      |
|                        |                                                                                                                           | Temperature (degree C) | 24.900                            |                      |
|                        |                                                                                                                           | Origin                 | spect                             |                      |
|                        |                                                                                                                           | Pulse Sequence         | zg30                              |                      |
|                        |                                                                                                                           | Spectrum Offset (Hz)   | 3490.9019                         |                      |

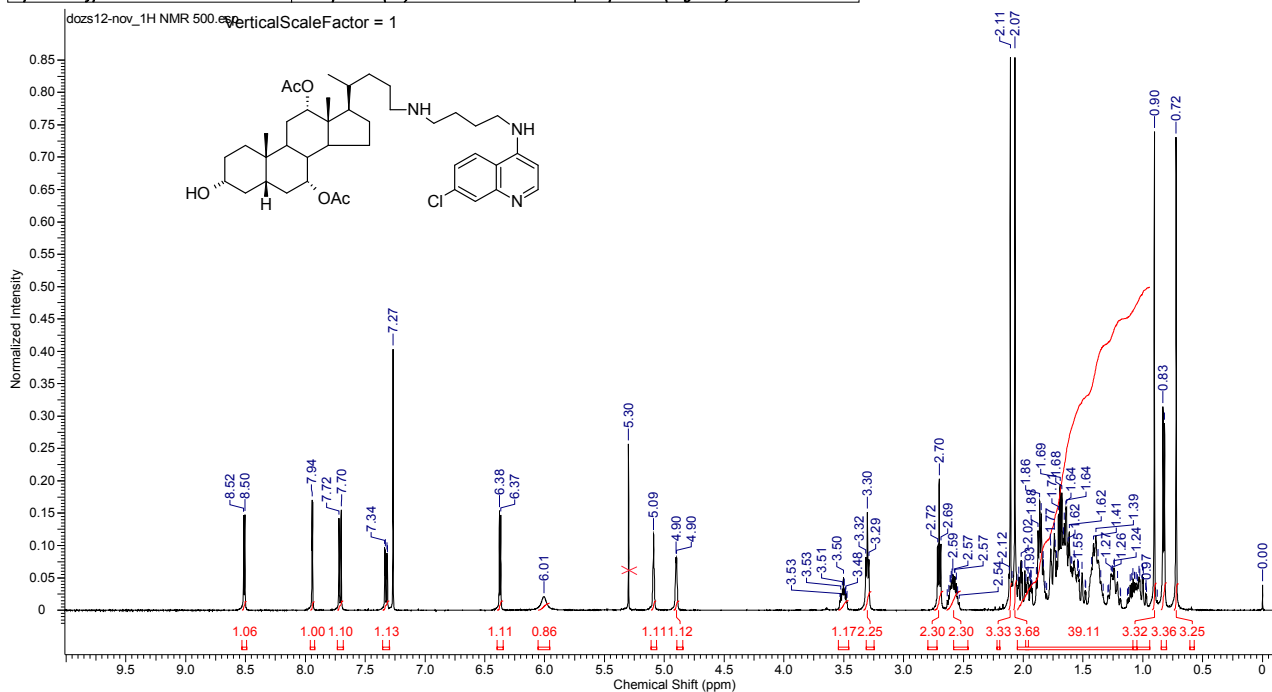

**Compound 18 (DOZS12):  $^{13}\text{C}$  NMR spectrum (125 MHz):**

2/25/2014 11:59:00 AM

| Number of Nuclei 0 C's |                                                                                                                           |                        |                                   |                      |
|------------------------|---------------------------------------------------------------------------------------------------------------------------|------------------------|-----------------------------------|----------------------|
| Acquisition Time (sec) | 0.5505                                                                                                                    | Comment                | 5 mm BBO BB-1H/D Z-GRD Z8007/0118 |                      |
| Date Stamp             | 22 Feb 2014 10:29:36                                                                                                      |                        | Date                              | 22 Feb 2014 10:29:36 |
| File Name              | C:\Users\Dejan Ospenica\Documents\Radovi\Aminohinoliniski\DO152\ostali\Recenzija\Spektri NMR novidozs12-nov\2\2\data\1\1r |                        |                                   |                      |
| Frequency (MHz)        | 125.79                                                                                                                    | Nucleus                | $^{13}\text{C}$                   |                      |
| Original Points Count  | 16384                                                                                                                     | Owner                  | nmrsu                             |                      |
| Receiver Gain          | 2050.00                                                                                                                   | SW(cyclical) (Hz)      | 29761.90                          |                      |
| Spectrum Type          | STANDARD                                                                                                                  | Sweep Width (Hz)       | 29761.45                          |                      |
|                        |                                                                                                                           | Number of Transients   | 283                               |                      |
|                        |                                                                                                                           | Points Count           | 65536                             |                      |
|                        |                                                                                                                           | Solvent                | CHLOROFORM-d                      |                      |
|                        |                                                                                                                           | Temperature (degree C) | 25.200                            |                      |
|                        |                                                                                                                           | Origin                 | spect                             |                      |
|                        |                                                                                                                           | Pulse Sequence         | zgpg30                            |                      |
|                        |                                                                                                                           | Spectrum Offset (Hz)   | 13832.3740                        |                      |

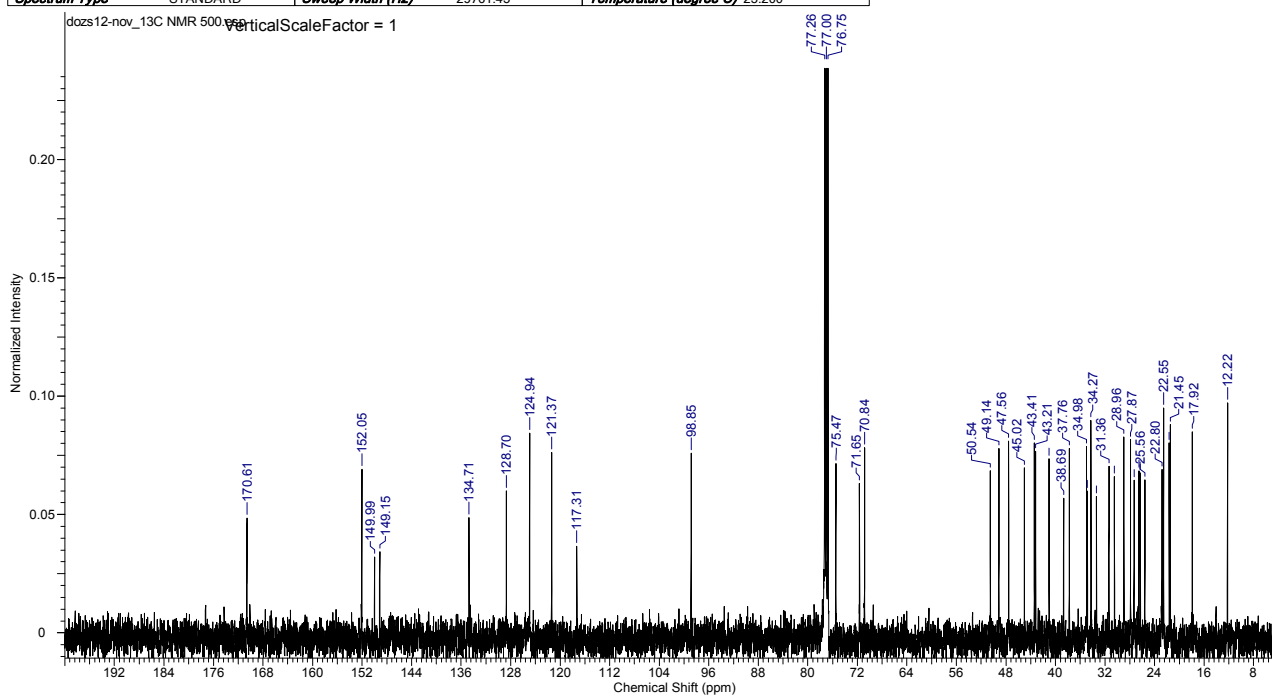

**Compound 19 (DOJK07):**  $^1\text{H}$  NMR spectrum (200 MHz): HPLC purity: method A: RT 1.869, area 99.39 %; method C: RT=11.500, area 95.59 %.

2/25/2014 12:03:22 PM

| Number of Nuclei 0 H's |                                                                                                                                  |                |              |                        |                     |
|------------------------|----------------------------------------------------------------------------------------------------------------------------------|----------------|--------------|------------------------|---------------------|
| Acquisition Time (sec) | 1.3913                                                                                                                           | Comment        | dojk07       | Date                   | Apr 5 11            |
| File Name              | C:\Users\Dejan Ovsenica\Documents\Radovi\Aminohinoliniski\DO152\ostali\Recenzija\Spektri NMR_Stan\200 MHz\DOJK07\hdojk07.fid.fid |                |              |                        |                     |
| Frequency (MHz)        | 199.97                                                                                                                           | Nucleus        | $^1\text{H}$ | Number of Transients   | 66                  |
| Points Count           | 8192                                                                                                                             | Pulse Sequence | s2pul        | Receiver Gain          | 9.00                |
| Spectrum Offset (Hz)   | 1687.8647                                                                                                                        | Spectrum Type  | STANDARD     | Sweep Width (Hz)       | 4600.00             |
|                        |                                                                                                                                  |                |              | Solvent                | CHLOROFORM-d        |
|                        |                                                                                                                                  |                |              | Temperature (degree C) | AMBIENT TEMPERATURE |

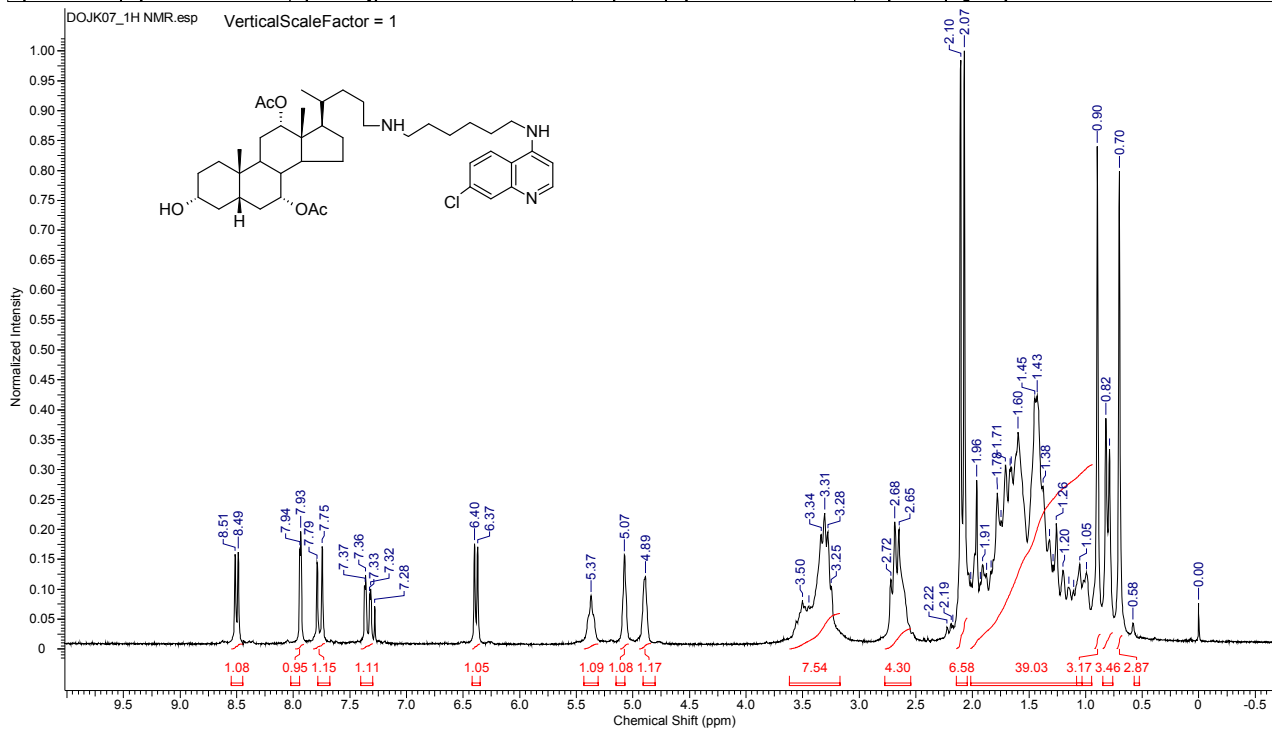

**Compound 19 (DOJK07):**  $^{13}\text{C}$  NMR spectrum (50 MHz):

2/27/2014 5:22:32 PM

| Number of Nuclei 0 C's |                                                                                                                                  |                |                 |                        |                     |
|------------------------|----------------------------------------------------------------------------------------------------------------------------------|----------------|-----------------|------------------------|---------------------|
| Acquisition Time (sec) | 1.0667                                                                                                                           | Comment        | dojk07          | Date                   | Apr 5 11            |
| File Name              | C:\Users\Dejan Ovsenica\Documents\Radovi\Aminohinoliniski\DO152\ostali\Recenzija\Spektri NMR_Stan\200 MHz\DOJK07\hdojk07.fid.fid |                |                 |                        |                     |
| Frequency (MHz)        | 50.29                                                                                                                            | Nucleus        | $^{13}\text{C}$ | Number of Transients   | 17116               |
| Points Count           | 16384                                                                                                                            | Pulse Sequence | s2pul           | Receiver Gain          | 25.00               |
| Spectrum Offset (Hz)   | 5120.5610                                                                                                                        | Spectrum Type  | STANDARD        | Sweep Width (Hz)       | 15000.00            |
|                        |                                                                                                                                  |                |                 | Solvent                | CHLOROFORM-d        |
|                        |                                                                                                                                  |                |                 | Temperature (degree C) | AMBIENT TEMPERATURE |

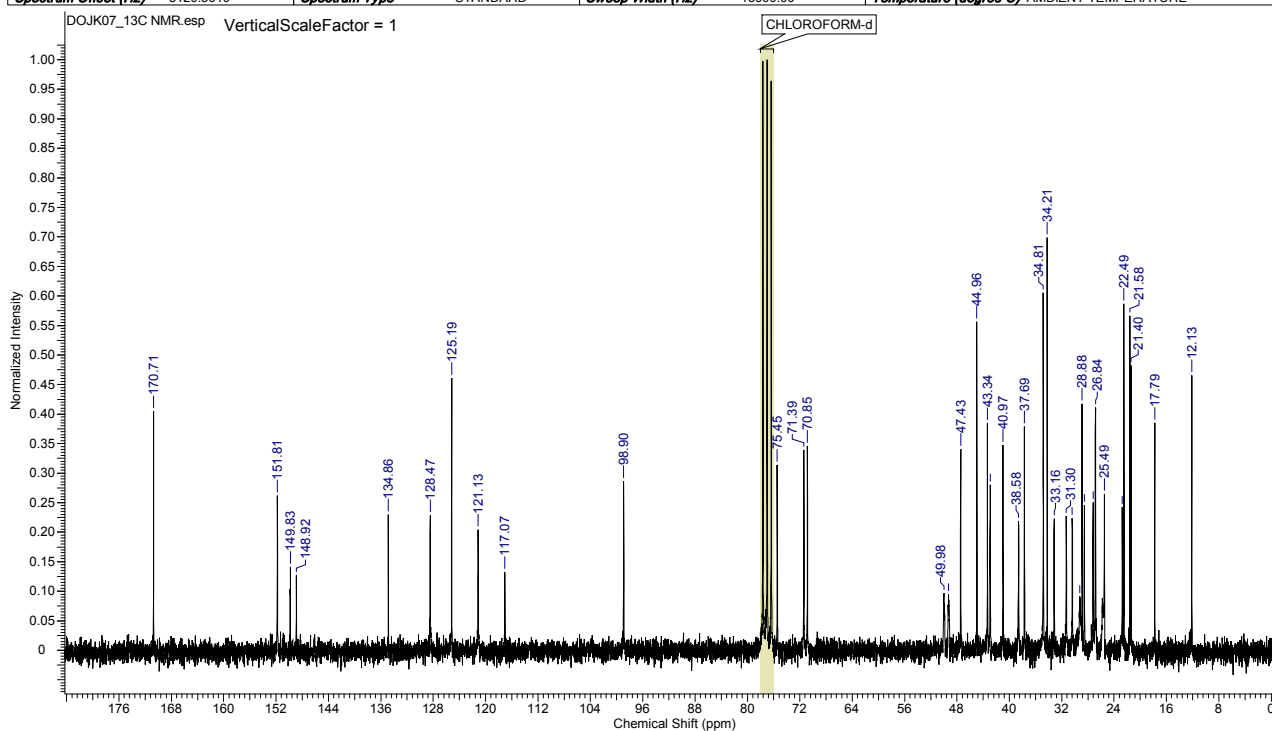

**Compound 19 (DOJK07): <sup>1</sup>H NMR spectrum (500 MHz):**

2/25/2014 12:06:27 PM

| Number of Nuclei 0 H's |                                                                                                                      |                   |                                   |                        |                      |
|------------------------|----------------------------------------------------------------------------------------------------------------------|-------------------|-----------------------------------|------------------------|----------------------|
| Acquisition Time (sec) | 2.1823                                                                                                               | Comment           | 5 mm BBO BB-1H/D Z-GRD Z8007/0118 | Date                   | 19 Feb 2014 10:44:32 |
| Date Stamp             | 19 Feb 2014 10:44:32                                                                                                 |                   |                                   |                        |                      |
| File Name              | C:\Users\Dejan Ospenica\Documents\Radovi\Aminohinoliniski\DO152\ostali\Recenzija\Spektri NMR novidojk07\1\pdata\111r |                   |                                   |                        |                      |
| Frequency (MHz)        | 500.26                                                                                                               | Nucleus           | 1H                                | Number of Transients   | 16                   |
| Original Points Count  | 16384                                                                                                                | Owner             | nmrsu                             | Points Count           | 32768                |
| Receiver Gain          | 362.00                                                                                                               | SW(cyclical) (Hz) | 7507.51                           | Solvent                | CHLOROFORM-d         |
| Spectrum Type          | STANDARD                                                                                                             | Sweep Width (Hz)  | 7507.28                           | Temperature (degree C) | 27.000               |
|                        |                                                                                                                      |                   |                                   | Origin                 | spect                |
|                        |                                                                                                                      |                   |                                   | Pulse Sequence         | zg30                 |
|                        |                                                                                                                      |                   |                                   | Spectrum Offset (Hz)   | 3489.7109            |

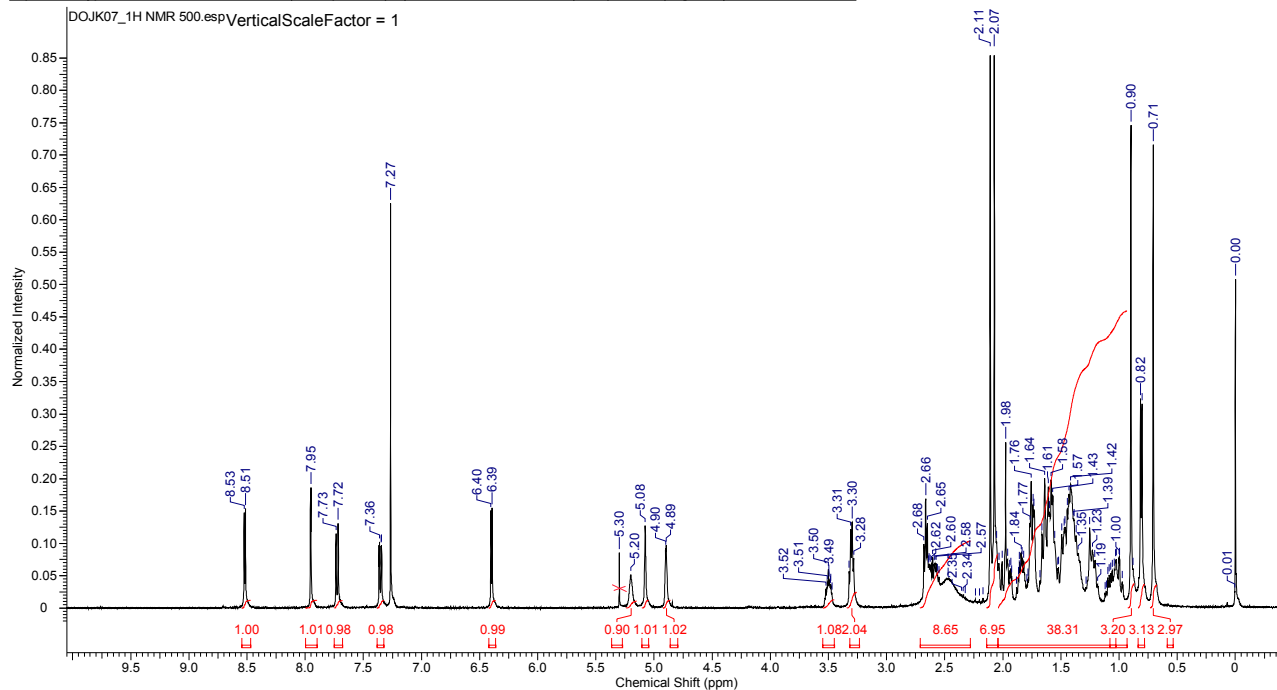**Compound 19 (DOJK07): <sup>13</sup>C NMR spectrum (125 MHz):**

2/27/2014 5:20:33 PM

| Number of Nuclei 0 C's |                                                                                                                      |                   |                                   |                        |                      |
|------------------------|----------------------------------------------------------------------------------------------------------------------|-------------------|-----------------------------------|------------------------|----------------------|
| Acquisition Time (sec) | 0.5505                                                                                                               | Comment           | 5 mm BBO BB-1H/D Z-GRD Z8007/0118 | Date                   | 20 Feb 2014 10:29:36 |
| Date Stamp             | 20 Feb 2014 10:29:36                                                                                                 |                   |                                   |                        |                      |
| File Name              | C:\Users\Dejan Ospenica\Documents\Radovi\Aminohinoliniski\DO152\ostali\Recenzija\Spektri NMR novidojk07\2\pdata\111r |                   |                                   |                        |                      |
| Frequency (MHz)        | 125.79                                                                                                               | Nucleus           | 13C                               | Number of Transients   | 100                  |
| Original Points Count  | 16384                                                                                                                | Owner             | nmrsu                             | Points Count           | 65536                |
| Receiver Gain          | 2050.00                                                                                                              | SW(cyclical) (Hz) | 29761.90                          | Solvent                | CHLOROFORM-d         |
| Spectrum Type          | STANDARD                                                                                                             | Sweep Width (Hz)  | 29761.45                          | Temperature (degree C) | 25.200               |
|                        |                                                                                                                      |                   |                                   | Origin                 | spect                |
|                        |                                                                                                                      |                   |                                   | Pulse Sequence         | zgpg30               |
|                        |                                                                                                                      |                   |                                   | Spectrum Offset (Hz)   | 13830.0361           |

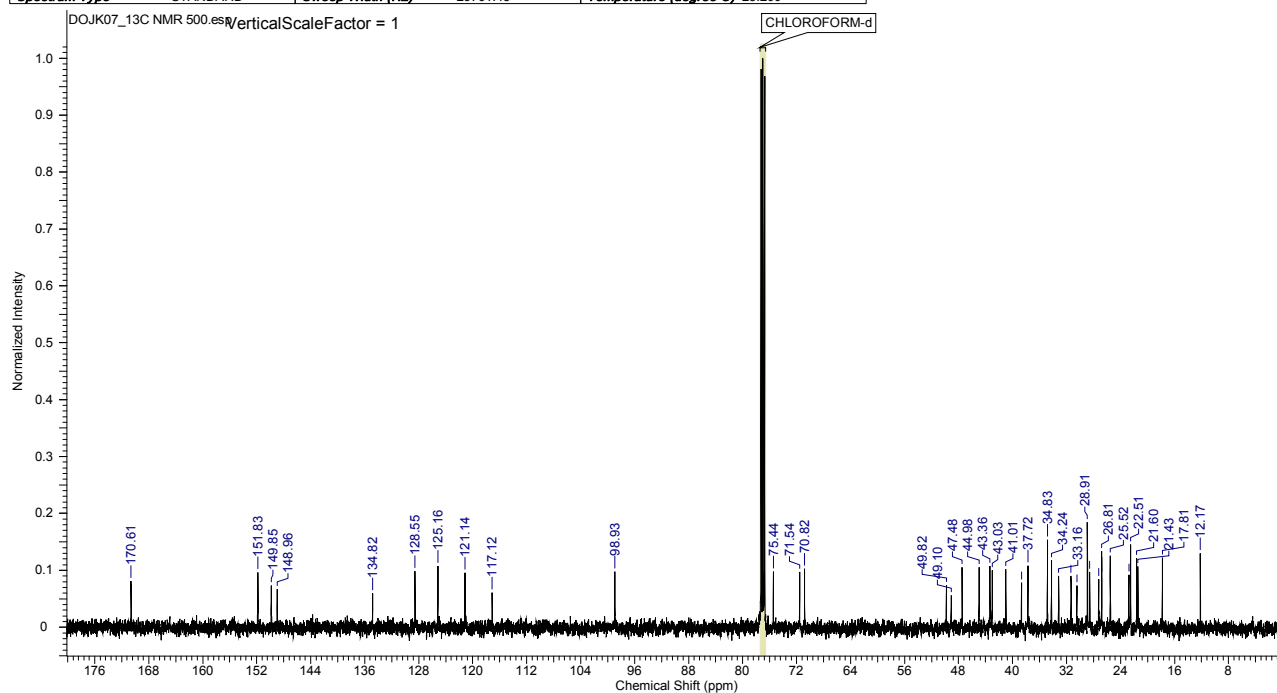

**Compound 20 (DO186):  $^1\text{H}$  NMR spectrum (500 MHz):** HPLC purity: method B: RT 8.703, area 96,21 %; method C: RT 13.199, area 95.18 %.

2/25/2014 12:10:29 PM

| Number of Nuclei 0 H's |                                                                                                                                       |                        |                      |                      |
|------------------------|---------------------------------------------------------------------------------------------------------------------------------------|------------------------|----------------------|----------------------|
| Acquisition Time (sec) | 2.9710                                                                                                                                | Date                   | 19 Feb 2009 11:05:52 |                      |
| File Name              | C:\Users\Dejan Opsenica\Documents\Radovi\Aminohinoliniski\DO152\i ostali\Recenzija\Spektri NMR_Star\500 MHz\DO186\DOAA074a1\pdata\11r |                        | Date Stamp           | 19 Feb 2009 11:05:52 |
| Frequency (MHz)        | 500.26                                                                                                                                | Nucleus                | $^1\text{H}$         |                      |
| Original Points Count  | 16384                                                                                                                                 | Owner                  | nmrsu                |                      |
| Receiver Gain          | 114.00                                                                                                                                | SW(cyclical) (Hz)      | 5514.71              |                      |
| Spectrum Type          | STANDARD                                                                                                                              | Sweep Width (Hz)       | 5514.37              |                      |
|                        |                                                                                                                                       | Temperature (degree C) | 25.000               |                      |
|                        |                                                                                                                                       | Number of Transients   | 16                   |                      |
|                        |                                                                                                                                       | Points Count           | 16384                |                      |
|                        |                                                                                                                                       | Solvent                | CHLOROFORM-d         |                      |
|                        |                                                                                                                                       | Spectrum Offset (Hz)   | 2304.3628            |                      |
|                        |                                                                                                                                       | Pulse Sequence         | zg30                 |                      |

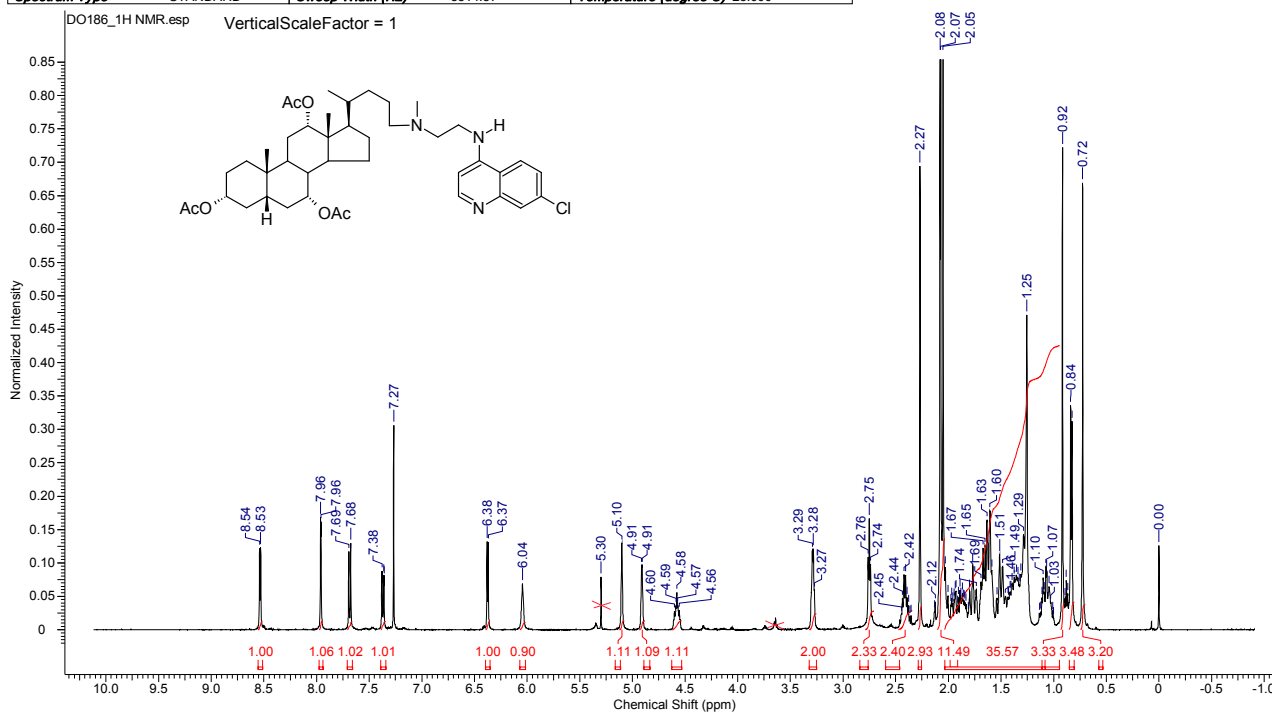

**Compound 20 (DO186):  $^{13}\text{C}$  NMR spectrum (125 MHz):**

2/25/2014 12:12:29 PM

| Number of Nuclei 0 C's |                                                                                                                                       |                        |                      |                      |
|------------------------|---------------------------------------------------------------------------------------------------------------------------------------|------------------------|----------------------|----------------------|
| Acquisition Time (sec) | 1.1010                                                                                                                                | Date                   | 19 Feb 2009 11:16:32 |                      |
| File Name              | C:\Users\Dejan Opsenica\Documents\Radovi\Aminohinoliniski\DO152\i ostali\Recenzija\Spektri NMR_Star\500 MHz\DO186\DOAA074a2\pdata\11r |                        | Date Stamp           | 19 Feb 2009 11:16:32 |
| Frequency (MHz)        | 125.79                                                                                                                                | Nucleus                | $^{13}\text{C}$      |                      |
| Original Points Count  | 32768                                                                                                                                 | Owner                  | nmrsu                |                      |
| Receiver Gain          | 812.00                                                                                                                                | SW(cyclical) (Hz)      | 29761.90             |                      |
| Spectrum Type          | STANDARD                                                                                                                              | Sweep Width (Hz)       | 29761.00             |                      |
|                        |                                                                                                                                       | Temperature (degree C) | 25.000               |                      |
|                        |                                                                                                                                       | Number of Transients   | 643                  |                      |
|                        |                                                                                                                                       | Points Count           | 32768                |                      |
|                        |                                                                                                                                       | Solvent                | CHLOROFORM-d         |                      |
|                        |                                                                                                                                       | Spectrum Offset (Hz)   | 13833.8828           |                      |
|                        |                                                                                                                                       | Pulse Sequence         | zpgq30               |                      |

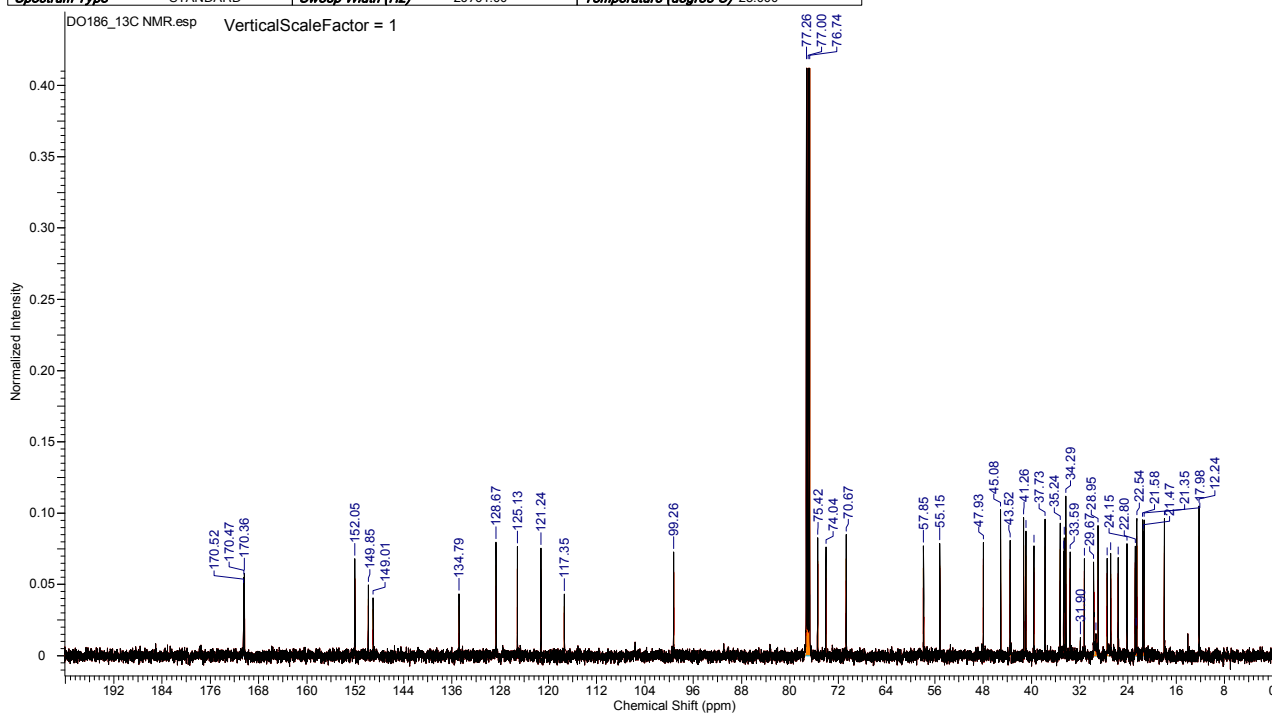

**Compound 21(DO193):**  $^1\text{H}$  NMR spectrum (500 MHz): HPLC purity: method A: RT 2.032, area 99.46 %; method B: RT 8.689, area 96.92 %.

2/26/2014 4:32:33 PM

| Number of Nuclei 0 H's |                                                                                                                             |                   |                      |                        |              |                      |           |
|------------------------|-----------------------------------------------------------------------------------------------------------------------------|-------------------|----------------------|------------------------|--------------|----------------------|-----------|
| Acquisition Time (sec) | 3.1261                                                                                                                      | Date              | 02 Sep 2009 12:20:48 |                        |              |                      |           |
| File Name              | C:\Users\Dejan Ovsenica\Documents\Radovi\Aminohinoliniski\DO152 i ostali\Recenzija\Spektri NMR_Ostalo\DO193\DK2\1\data\1\1r |                   | Date Stamp           | 02 Sep 2009 12:20:48   |              |                      |           |
| Frequency (MHz)        | 500.26                                                                                                                      | Nucleus           | $^1\text{H}$         | Number of Transients   | 16           | Origin               | spect     |
| Original Points Count  | 16384                                                                                                                       | Owner             | nmsru                | Points Count           | 32768        | Pulse Sequence       | zg30      |
| Receiver Gain          | 71.80                                                                                                                       | SW(cyclical) (Hz) | 5241.09              | Solvent                | CHLOROFORM-d | Spectrum Offset (Hz) | 2138.4419 |
| Spectrum Type          | STANDARD                                                                                                                    | Sweep Width (Hz)  | 5240.93              | Temperature (degree C) | 25.000       |                      |           |

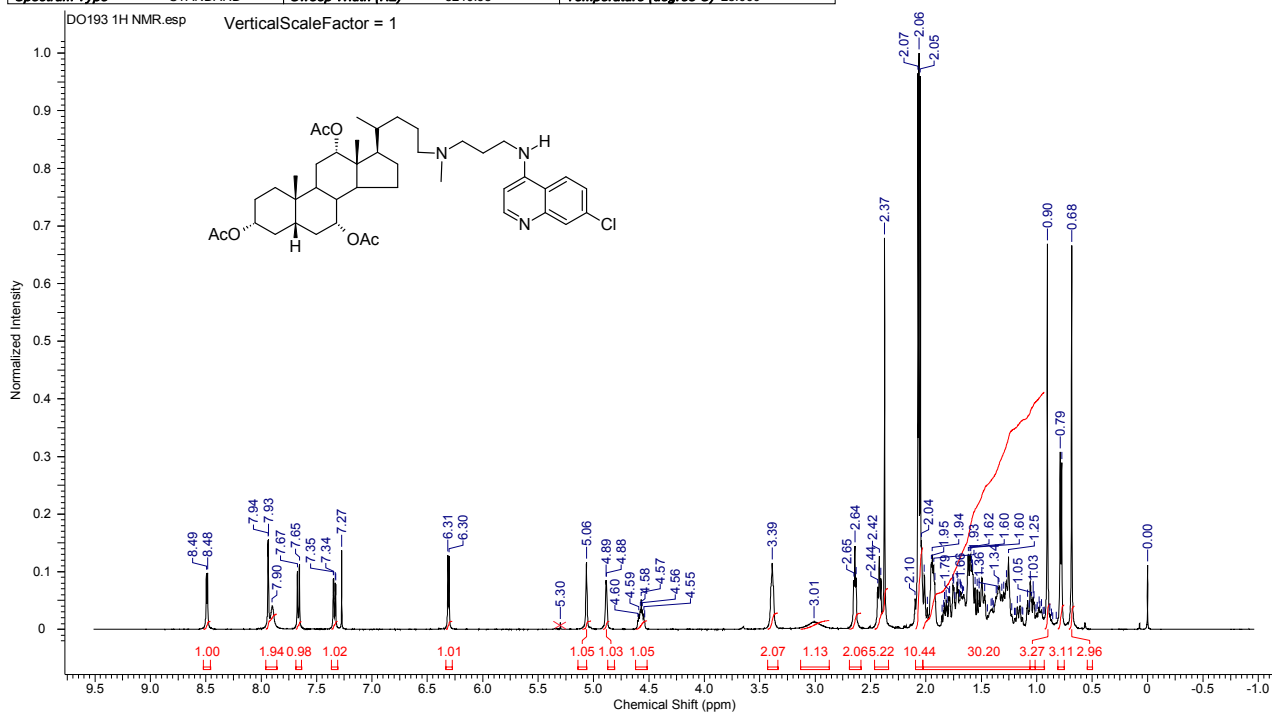

**Compound 21(DO193):**  $^{13}\text{C}$  NMR spectrum (125MHz):

2/26/2014 4:34:17 PM

| Number of Nuclei 0 C's |                                                                                                                             |                   |                      |                        |              |                      |            |
|------------------------|-----------------------------------------------------------------------------------------------------------------------------|-------------------|----------------------|------------------------|--------------|----------------------|------------|
| Acquisition Time (sec) | 0.5505                                                                                                                      | Date              | 02 Sep 2009 11:25:20 |                        |              |                      |            |
| File Name              | C:\Users\Dejan Ovsenica\Documents\Radovi\Aminohinoliniski\DO152 i ostali\Recenzija\Spektri NMR_Ostalo\DO193\DK2\2\data\1\1r |                   | Date Stamp           | 02 Sep 2009 11:25:20   |              |                      |            |
| Frequency (MHz)        | 125.79                                                                                                                      | Nucleus           | $^{13}\text{C}$      | Number of Transients   | 587          | Origin               | spect      |
| Original Points Count  | 16384                                                                                                                       | Owner             | nmsru                | Points Count           | 32768        | Pulse Sequence       | zgpg30     |
| Receiver Gain          | 1820.00                                                                                                                     | SW(cyclical) (Hz) | 29761.90             | Solvent                | CHLOROFORM-d | Spectrum Offset (Hz) | 13830.7754 |
| Spectrum Type          | STANDARD                                                                                                                    | Sweep Width (Hz)  | 29761.00             | Temperature (degree C) | 25.000       |                      |            |

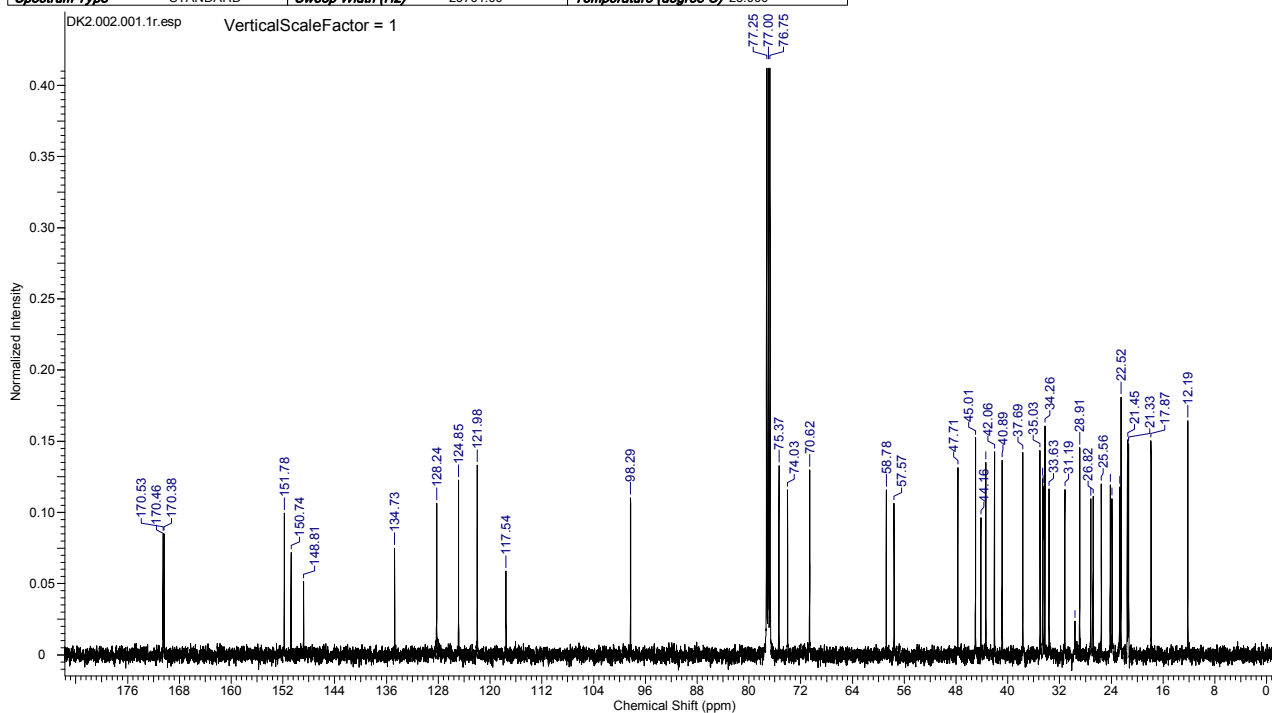

**Compound 22(DO184):  $^1\text{H}$  NMR spectrum (500 MHz):** HPLC purity: method A: RT 8.484, area 95.76 %; method B: RT 7.775, area 95.05 %; **method C: RT 10.069, area 95.10 %.**

2/25/2014 12:26:00 PM

| Number of Nuclei 0 H's |                                                                                                                       |                        |                                   |
|------------------------|-----------------------------------------------------------------------------------------------------------------------|------------------------|-----------------------------------|
| Acquisition Time (sec) | 2.1823                                                                                                                | Comment                | 5 mm BBO BB-1H/D Z-GRD Z8007/0118 |
| Date Stamp             | 21 Feb 2014 10:06:08                                                                                                  | Date                   | 21 Feb 2014 10:06:08              |
| File Name              | C:\Users\Dejan Ospenica\Documents\Radovi\Aminohinoliniski\DO152\ostali\Recenzija\Spektri NMR novido184nov1\pdata\111r |                        |                                   |
| Frequency (MHz)        | 500.26                                                                                                                | Nucleus                | $^1\text{H}$                      |
| Original Points Count  | 16384                                                                                                                 | Owner                  | nmsru                             |
| Receiver Gain          | 362.00                                                                                                                | SW(cyclical) (Hz)      | 7507.51                           |
| Spectrum Type          | STANDARD                                                                                                              | Sweep Width (Hz)       | 7507.28                           |
|                        |                                                                                                                       | Solvent                | CHLOROFORM-d                      |
|                        |                                                                                                                       | Temperature (degree C) | 24.800                            |
|                        |                                                                                                                       | Number of Transients   | 14                                |
|                        |                                                                                                                       | Points Count           | 32768                             |
|                        |                                                                                                                       | Origin                 | spect                             |
|                        |                                                                                                                       | Pulse Sequence         | zg30                              |
|                        |                                                                                                                       | Spectrum Offset (Hz)   | 3495.1990                         |

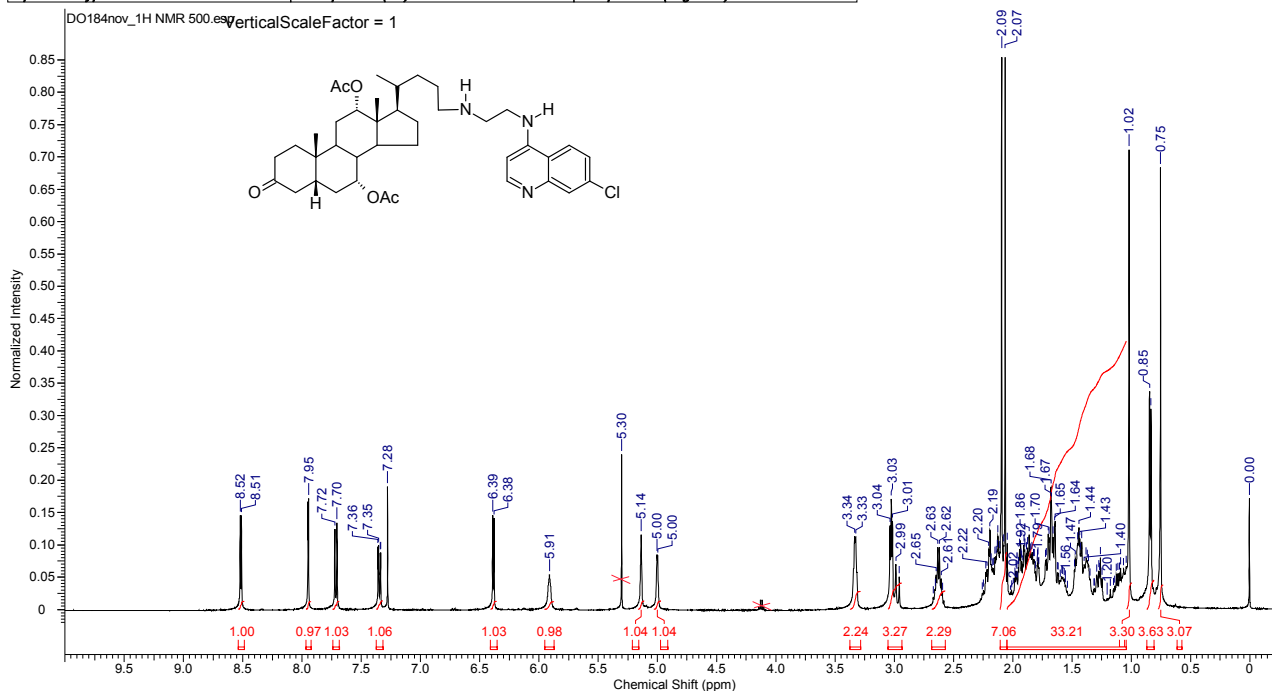

**Compound 22(DO184):  $^{13}\text{C}$  NMR spectrum (125 MHz):**

2/25/2014 12:27:53 PM

| Number of Nuclei 0 C's |                                                                                                                       |                        |                                   |
|------------------------|-----------------------------------------------------------------------------------------------------------------------|------------------------|-----------------------------------|
| Acquisition Time (sec) | 0.5505                                                                                                                | Comment                | 5 mm BBO BB-1H/D Z-GRD Z8007/0118 |
| Date Stamp             | 21 Feb 2014 10:06:08                                                                                                  | Date                   | 21 Feb 2014 10:06:08              |
| File Name              | C:\Users\Dejan Ospenica\Documents\Radovi\Aminohinoliniski\DO152\ostali\Recenzija\Spektri NMR novido184nov2\pdata\111r |                        |                                   |
| Frequency (MHz)        | 125.79                                                                                                                | Nucleus                | $^{13}\text{C}$                   |
| Original Points Count  | 16384                                                                                                                 | Owner                  | nmsru                             |
| Receiver Gain          | 2050.00                                                                                                               | SW(cyclical) (Hz)      | 29761.90                          |
| Spectrum Type          | STANDARD                                                                                                              | Sweep Width (Hz)       | 29761.45                          |
|                        |                                                                                                                       | Solvent                | CHLOROFORM-d                      |
|                        |                                                                                                                       | Temperature (degree C) | 25.000                            |
|                        |                                                                                                                       | Number of Transients   | 174                               |
|                        |                                                                                                                       | Points Count           | 65536                             |
|                        |                                                                                                                       | Origin                 | spect                             |
|                        |                                                                                                                       | Pulse Sequence         | zpgp30                            |
|                        |                                                                                                                       | Spectrum Offset (Hz)   | 13829.1396                        |

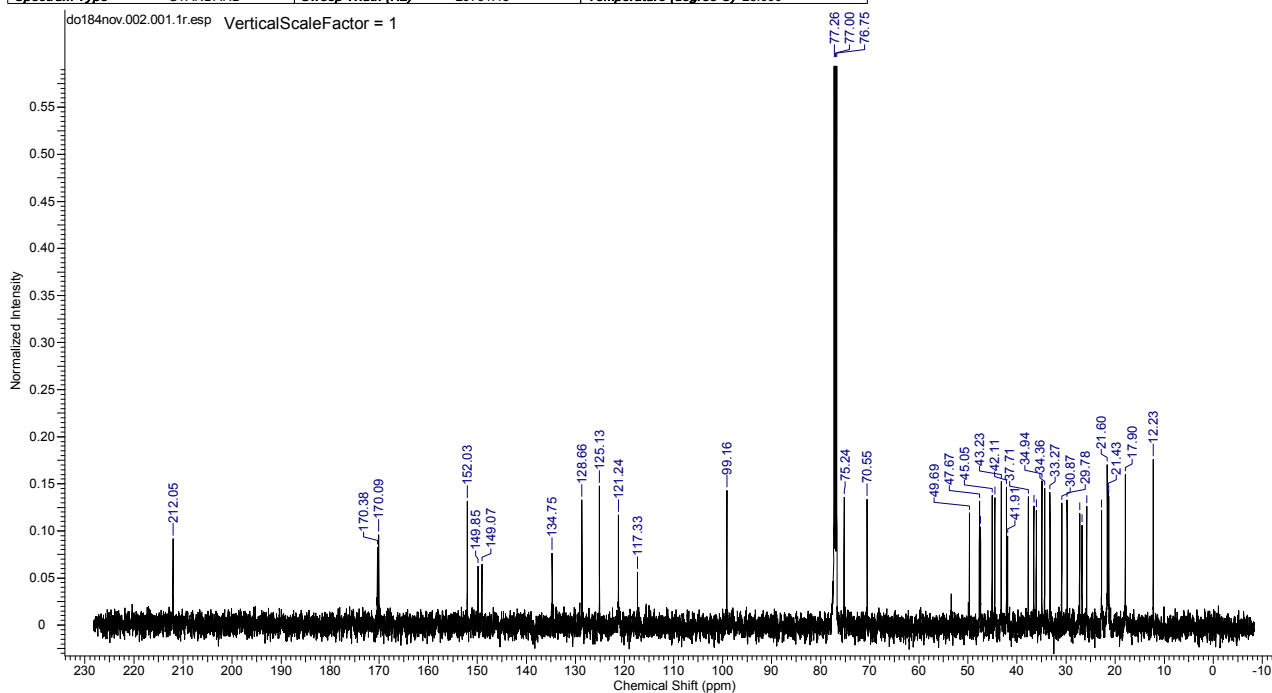



**Compound 23(DR09):** <sup>1</sup>H NMR spectrum (200 MHz): HPLC purity: method C: RT=13.105, area 95.15 %; method D: RT 5.414, area 95.21 %.

2/25/2014 12:32:13 PM

| Number of Nuclei 0 H's |                                                                                                                               |                |                |                        |                     |
|------------------------|-------------------------------------------------------------------------------------------------------------------------------|----------------|----------------|------------------------|---------------------|
| Acquisition Time (sec) | 1.3913                                                                                                                        | Comment        | DR09           | Date                   | Jun 1 09            |
| File Name              | C:\Users\Dejan Ospenica\Documents\Radovi\Aminohinolinski\DO152 i ostali\Recenzija\Spektri NMR_Star\200 MHz\DR09\hdr09.fid.fid |                |                |                        |                     |
| Frequency (MHz)        | 199.97                                                                                                                        | Nucleus        | <sup>1</sup> H | Number of Transients   | 104                 |
| Points Count           | 8192                                                                                                                          | Pulse Sequence | s2pul          | Receiver Gain          | 7.00                |
| Spectrum Offset (Hz)   | 1687.3032                                                                                                                     | Spectrum Type  | STANDARD       | Sweep Width (Hz)       | 4600.00             |
|                        |                                                                                                                               |                |                | Solvent                | CHLOROFORM-d        |
|                        |                                                                                                                               |                |                | Temperature (degree C) | AMBIENT TEMPERATURE |

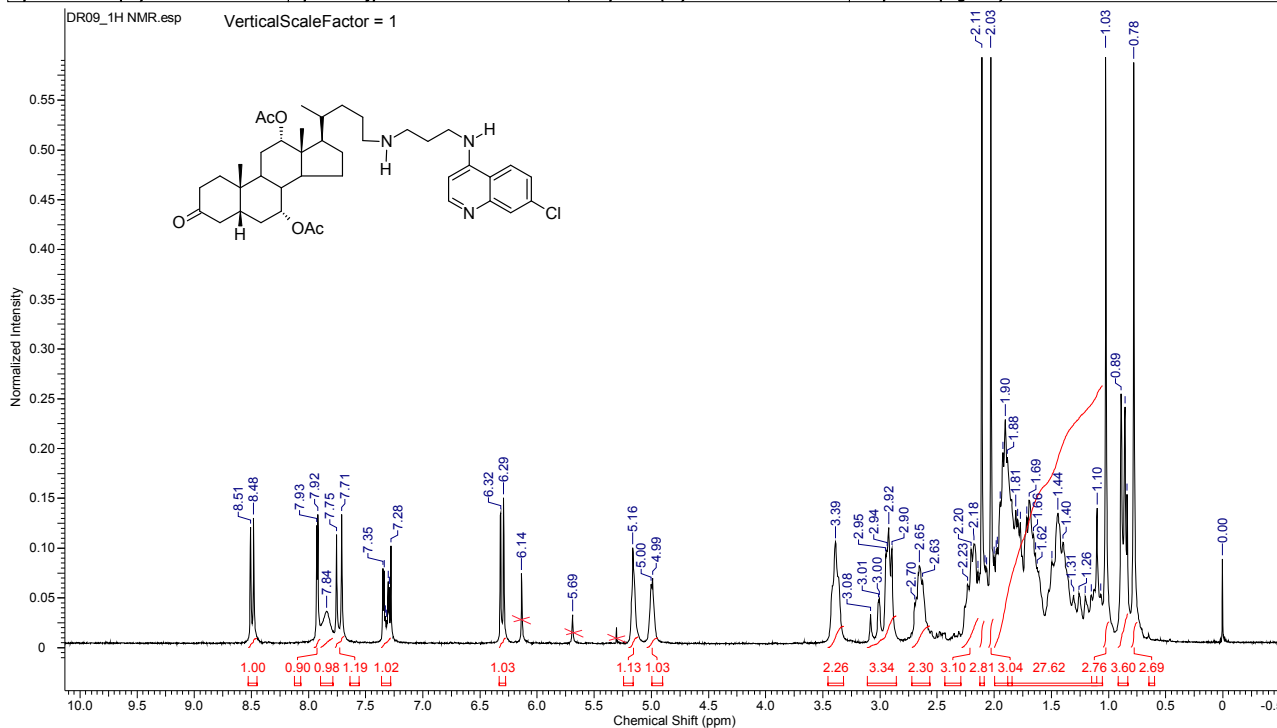

**Compound 23(DR09):** <sup>13</sup>C NMR spectrum (50 MHz):

2/27/2014 6:17:05 PM

| Number of Nuclei 0 C's |                                                                                                                               |                |                 |                        |                     |
|------------------------|-------------------------------------------------------------------------------------------------------------------------------|----------------|-----------------|------------------------|---------------------|
| Acquisition Time (sec) | 1.0667                                                                                                                        | Comment        | DR09            | Date                   | Jun 1 09            |
| File Name              | C:\Users\Dejan Ospenica\Documents\Radovi\Aminohinolinski\DO152 i ostali\Recenzija\Spektri NMR_Star\200 MHz\DR09\cdr09.fid.fid |                |                 |                        |                     |
| Frequency (MHz)        | 50.29                                                                                                                         | Nucleus        | <sup>13</sup> C | Number of Transients   | 330                 |
| Points Count           | 16384                                                                                                                         | Pulse Sequence | s2pul           | Receiver Gain          | 25.00               |
| Spectrum Offset (Hz)   | 4810.1602                                                                                                                     | Spectrum Type  | STANDARD        | Sweep Width (Hz)       | 15000.00            |
|                        |                                                                                                                               |                |                 | Solvent                | CHLOROFORM-d        |
|                        |                                                                                                                               |                |                 | Temperature (degree C) | AMBIENT TEMPERATURE |

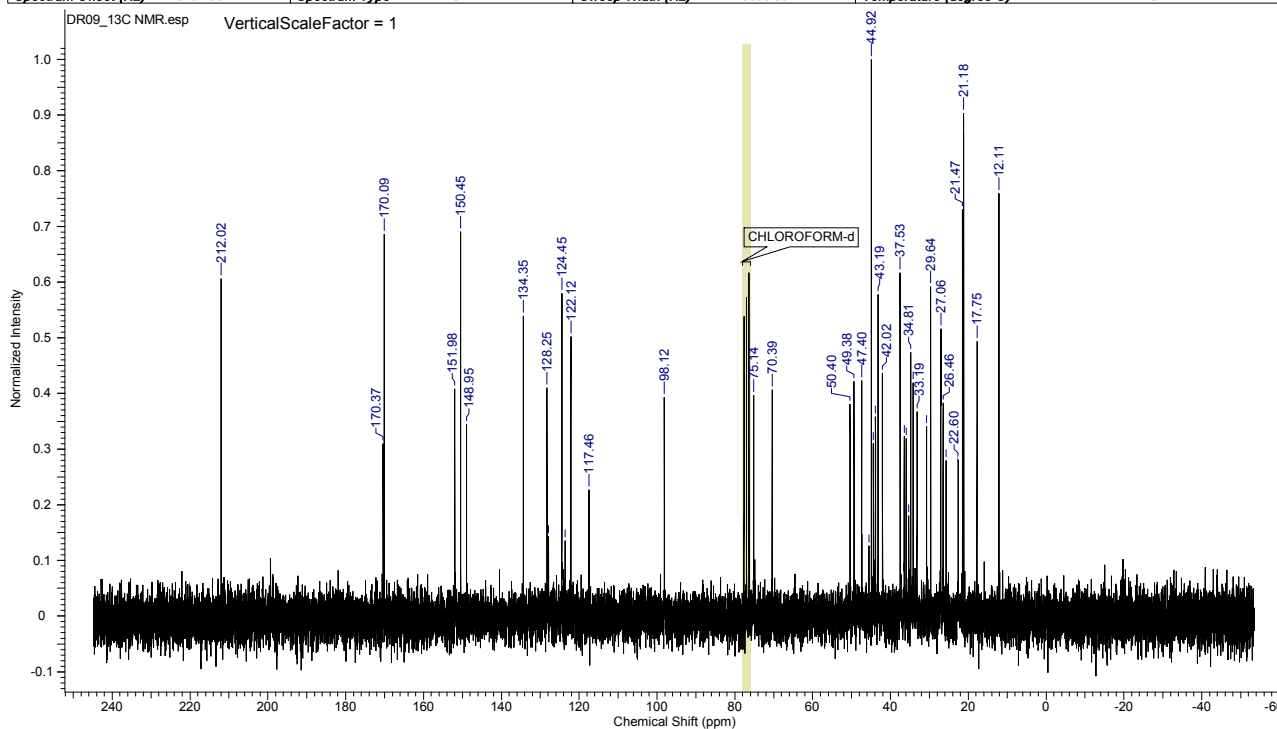

Compound 23(DR09): <sup>1</sup>H NMR spectrum (500 MHz):

2/25/2014 12:36:09 PM

| Number of Nuclei 0 H's |                                                                                                                        |                   |                                   |                        |                      |
|------------------------|------------------------------------------------------------------------------------------------------------------------|-------------------|-----------------------------------|------------------------|----------------------|
| Acquisition Time (sec) | 2.1823                                                                                                                 | Comment           | 5 mm BBO BB-1H/D Z-GRD Z8007/0118 | Date                   | 21 Feb 2014 09:21:20 |
| Date Stamp             | 21 Feb 2014 09:21:20                                                                                                   |                   |                                   |                        |                      |
| File Name              | C:\Users\Dejan Opsenica\Documents\Radovi\Aminohinoliniski\DO152 i ostali\Recenzija\Spektri NMR nov\dr09nov\1\pdata\11r |                   |                                   |                        |                      |
| Frequency (MHz)        | 500.26                                                                                                                 | Nucleus           | <sup>1</sup> H                    | Number of Transients   | 14                   |
| Original Points Count  | 16384                                                                                                                  | Owner             | nmrsu                             | Points Count           | 32768                |
| Receiver Gain          | 71.80                                                                                                                  | SW(cyclical) (Hz) | 7507.51                           | Solvent                | CHLOROFORM-d         |
| Spectrum Type          | STANDARD                                                                                                               | Sweep Width (Hz)  | 7507.28                           | Temperature (degree C) | 25.000               |
|                        |                                                                                                                        |                   |                                   | Origin                 | spect                |
|                        |                                                                                                                        |                   |                                   | Pulse Sequence         | zg30                 |
|                        |                                                                                                                        |                   |                                   | Spectrum Offset (Hz)   | 3489.0959            |

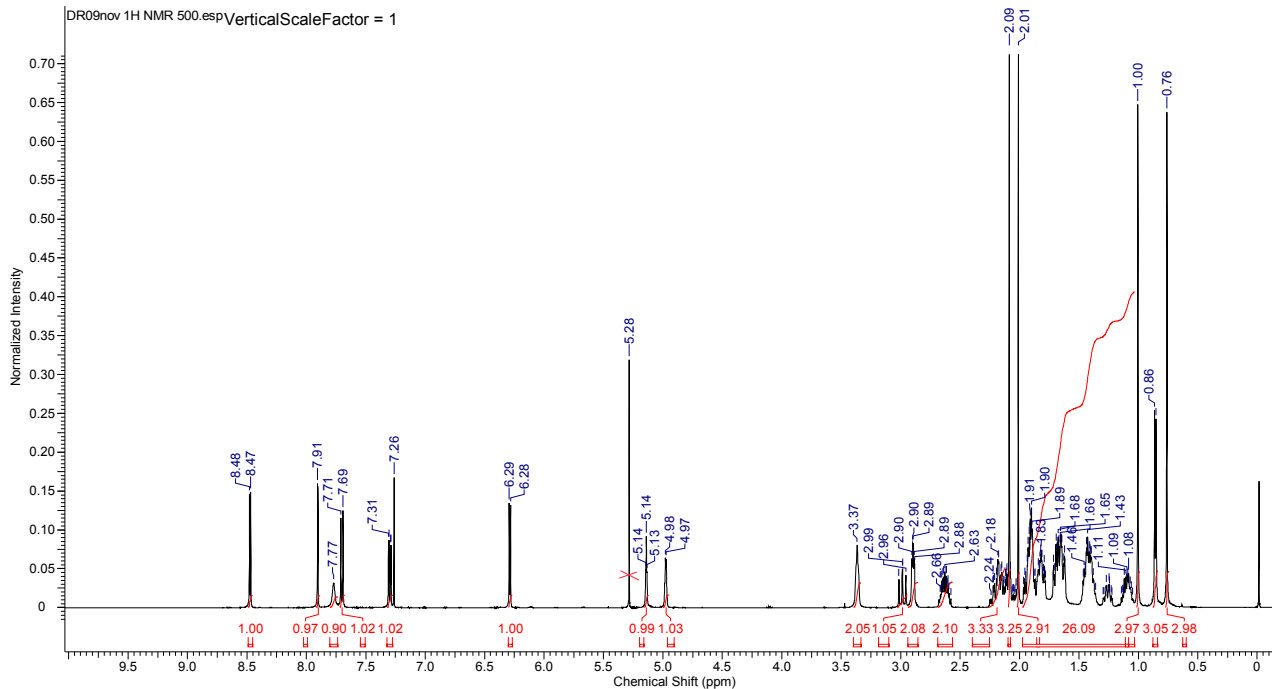Compound 23(DR09): <sup>13</sup>C NMR spectrum (125 MHz):

2/25/2014 12:37:03 PM

| Number of Nuclei 0 C's |                                                                                                                        |                   |                                   |                        |                      |
|------------------------|------------------------------------------------------------------------------------------------------------------------|-------------------|-----------------------------------|------------------------|----------------------|
| Acquisition Time (sec) | 0.5505                                                                                                                 | Comment           | 5 mm BBO BB-1H/D Z-GRD Z8007/0118 | Date                   | 21 Feb 2014 09:23:28 |
| Date Stamp             | 21 Feb 2014 09:23:28                                                                                                   |                   |                                   |                        |                      |
| File Name              | C:\Users\Dejan Opsenica\Documents\Radovi\Aminohinoliniski\DO152 i ostali\Recenzija\Spektri NMR nov\dr09nov\2\pdata\11r |                   |                                   |                        |                      |
| Frequency (MHz)        | 125.79                                                                                                                 | Nucleus           | <sup>13</sup> C                   | Number of Transients   | 88                   |
| Original Points Count  | 16384                                                                                                                  | Owner             | nmrsu                             | Points Count           | 65536                |
| Receiver Gain          | 2050.00                                                                                                                | SW(cyclical) (Hz) | 29761.90                          | Solvent                | CHLOROFORM-d         |
| Spectrum Type          | STANDARD                                                                                                               | Sweep Width (Hz)  | 29761.45                          | Temperature (degree C) | 25.200               |
|                        |                                                                                                                        |                   |                                   | Origin                 | spect                |
|                        |                                                                                                                        |                   |                                   | Pulse Sequence         | zpgg30               |
|                        |                                                                                                                        |                   |                                   | Spectrum Offset (Hz)   | 13829.1035           |

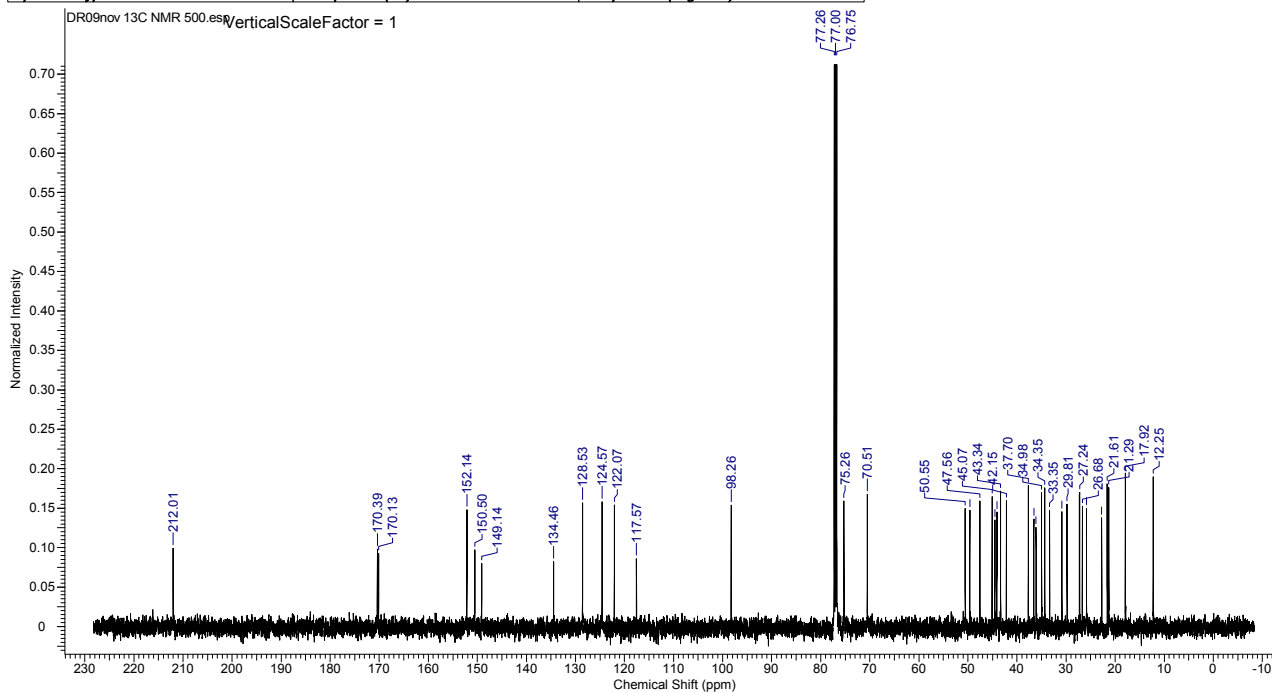

**Compound 24(DOZS13):**  $^1\text{H}$  NMR spectrum (500 MHz): HPLC purity: method A: RT 1.872, area 99.17 %; method C: RT 12.077, area 95.14 %.

2/25/2014 1:26:52 PM

| Number of Nuclei 0 H's |                                                                                                                        |                   |                                   |                        |                      |
|------------------------|------------------------------------------------------------------------------------------------------------------------|-------------------|-----------------------------------|------------------------|----------------------|
| Acquisition Time (sec) | 2.1823                                                                                                                 | Comment           | 5 mm BBO BB-1H/D Z-GRD Z8007/0118 | Date                   | 22 Feb 2014 10:21:04 |
| Date Stamp             | 22 Feb 2014 10:21:04                                                                                                   |                   |                                   |                        |                      |
| File Name              | C:\Users\Dejan Ospenica\Documents\Radovi\Aminohinoliniski\DO152\ostali\Recenzija\Spektri NMR novidozs13-nov1\pdata\11r |                   |                                   |                        |                      |
| Frequency (MHz)        | 500.26                                                                                                                 | Nucleus           | $^1\text{H}$                      | Number of Transients   | 14                   |
| Original Points Count  | 16384                                                                                                                  | Owner             | nmrsu                             | Points Count           | 32768                |
| Receiver Gain          | 362.00                                                                                                                 | SW(cyclical) (Hz) | 7507.51                           | Solvent                | CHLOROFORM-d         |
| Spectrum Type          | STANDARD                                                                                                               | Sweep Width (Hz)  | 7507.28                           | Temperature (degree C) | 24.800               |
|                        |                                                                                                                        |                   |                                   | Spectrum Offset (Hz)   | 3491.4070            |

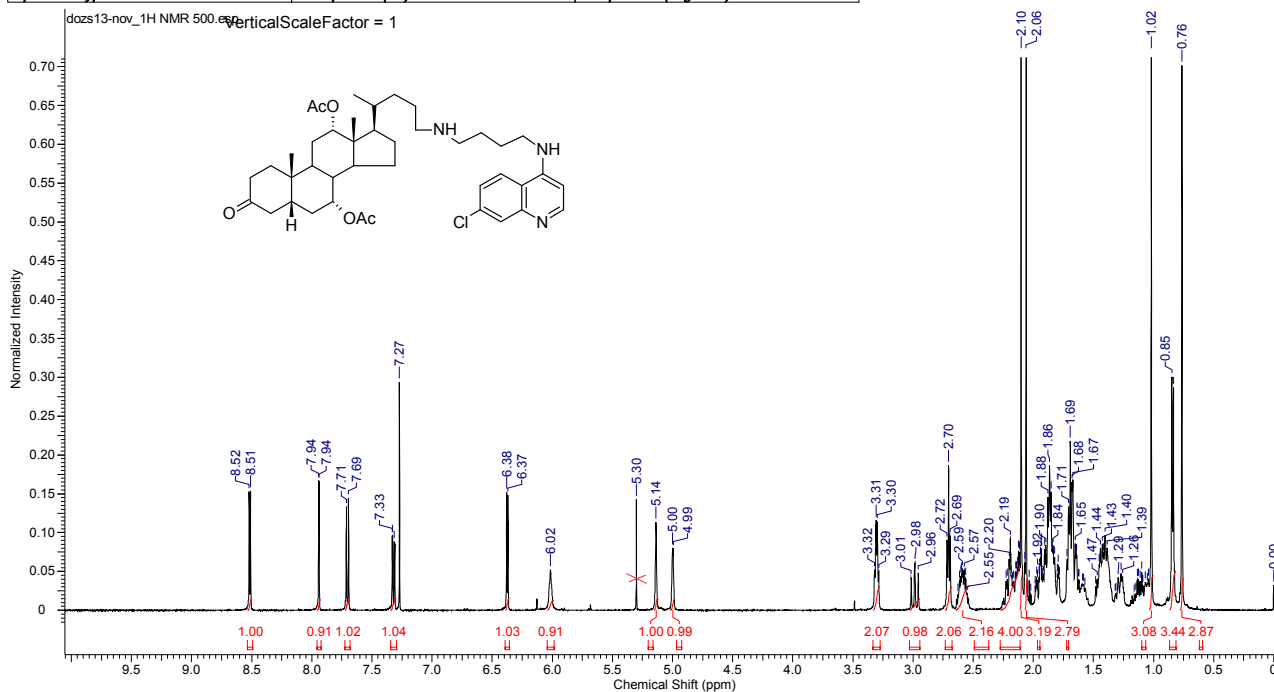

**Compound 24(DOZS13):**  $^{13}\text{C}$  NMR spectrum (125 MHz):

2/25/2014 12:42:27 PM

| Number of Nuclei 0 C's |                                                                                                                        |                   |                                   |                        |                      |
|------------------------|------------------------------------------------------------------------------------------------------------------------|-------------------|-----------------------------------|------------------------|----------------------|
| Acquisition Time (sec) | 0.5505                                                                                                                 | Comment           | 5 mm BBO BB-1H/D Z-GRD Z8007/0118 | Date                   | 22 Feb 2014 10:12:32 |
| Date Stamp             | 22 Feb 2014 10:12:32                                                                                                   |                   |                                   |                        |                      |
| File Name              | C:\Users\Dejan Ospenica\Documents\Radovi\Aminohinoliniski\DO152\ostali\Recenzija\Spektri NMR novidozs13-nov2\pdata\11r |                   |                                   |                        |                      |
| Frequency (MHz)        | 125.79                                                                                                                 | Nucleus           | $^{13}\text{C}$                   | Number of Transients   | 265                  |
| Original Points Count  | 16384                                                                                                                  | Owner             | nmrsu                             | Points Count           | 65536                |
| Receiver Gain          | 2050.00                                                                                                                | SW(cyclical) (Hz) | 29761.90                          | Solvent                | CHLOROFORM-d         |
| Spectrum Type          | STANDARD                                                                                                               | Sweep Width (Hz)  | 29761.45                          | Temperature (degree C) | 25.000               |
|                        |                                                                                                                        |                   |                                   | Spectrum Offset (Hz)   | 13831.5049           |

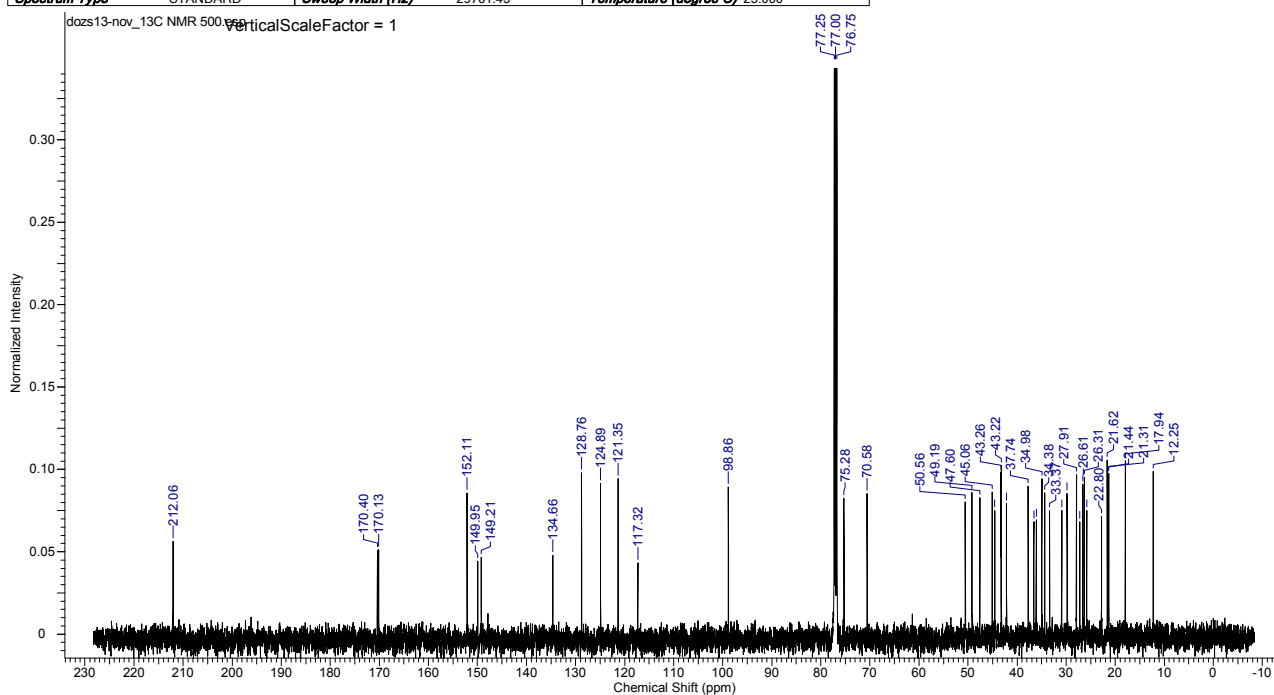

**Compound 25(DOJK08):**  $^1\text{H}$  NMR spectrum (500 MHz): HPLC purity: method A: RT 1.810, area 99.47 %; method C: RT=12.061, area 97.17 %.

2/25/2014 12:45:40 PM

| Number of Nuclei 0 H's |                                                                                                                                    |                        |                      |                      |
|------------------------|------------------------------------------------------------------------------------------------------------------------------------|------------------------|----------------------|----------------------|
| Acquisition Time (sec) | 2.7263                                                                                                                             | Date                   | 02 Jun 2011 09:00:16 |                      |
| File Name              | C:\Users\Dejan Opsenica\Documents\Radovi\Aminohinoliniski\DO152 i ostali\Recenzija\Spektri NMR_ Stari\500 MHz\DOJKET1\1\pdata\111r |                        | Date Stamp           | 02 Jun 2011 09:00:16 |
| Frequency (MHz)        | 500.26                                                                                                                             | Nucleus                | $^1\text{H}$         |                      |
| Original Points Count  | 16384                                                                                                                              | Owner                  | nmsru                |                      |
| Receiver Gain          | 256.00                                                                                                                             | SW(cyclical) (Hz)      | 6009.62              |                      |
| Spectrum Type          | STANDARD                                                                                                                           | Sweep Width (Hz)       | 6009.43              |                      |
|                        |                                                                                                                                    | Points Count           | 32768                |                      |
|                        |                                                                                                                                    | Solvent                | CHLOROFORM-d         |                      |
|                        |                                                                                                                                    | Temperature (degree C) | 25.000               |                      |
|                        |                                                                                                                                    | Origin                 | spect                |                      |
|                        |                                                                                                                                    | Pulse Sequence         | zg30                 |                      |
|                        |                                                                                                                                    | Spectrum Offset (Hz)   | 2562.5410            |                      |

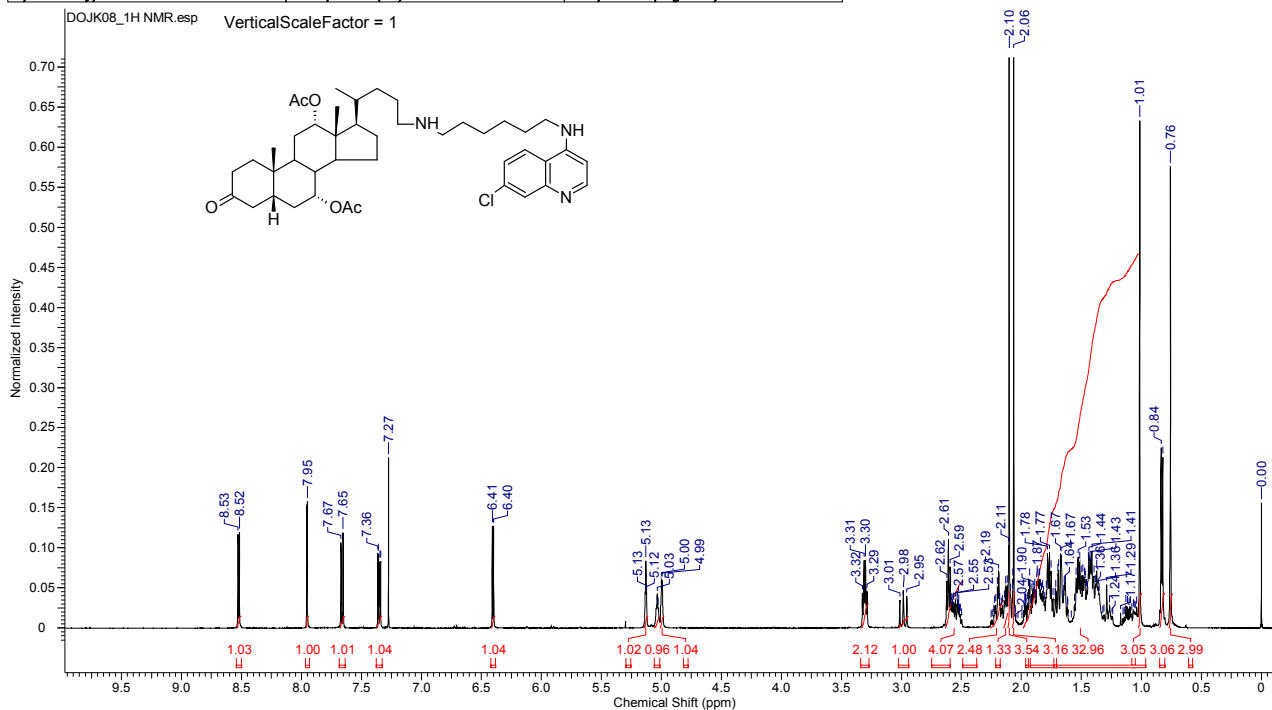

**Compound 25(DOJK08):**  $^{13}\text{C}$  NMR spectrum (125 MHz):

2/25/2014 12:47:16 PM

| Number of Nuclei 0 C's |                                                                                                                                    |                        |                      |                      |
|------------------------|------------------------------------------------------------------------------------------------------------------------------------|------------------------|----------------------|----------------------|
| Acquisition Time (sec) | 0.5505                                                                                                                             | Date                   | 02 Jun 2011 09:04:32 |                      |
| File Name              | C:\Users\Dejan Opsenica\Documents\Radovi\Aminohinoliniski\DO152 i ostali\Recenzija\Spektri NMR_ Stari\500 MHz\DOJKET1\6\pdata\111r |                        | Date Stamp           | 02 Jun 2011 09:04:32 |
| Frequency (MHz)        | 125.79                                                                                                                             | Nucleus                | $^{13}\text{C}$      |                      |
| Original Points Count  | 16384                                                                                                                              | Owner                  | nmsru                |                      |
| Receiver Gain          | 1030.00                                                                                                                            | SW(cyclical) (Hz)      | 29761.90             |                      |
| Spectrum Type          | STANDARD                                                                                                                           | Sweep Width (Hz)       | 29761.00             |                      |
|                        |                                                                                                                                    | Points Count           | 703                  |                      |
|                        |                                                                                                                                    | Solvent                | CHLOROFORM-d         |                      |
|                        |                                                                                                                                    | Temperature (degree C) | 25.000               |                      |
|                        |                                                                                                                                    | Origin                 | spect                |                      |
|                        |                                                                                                                                    | Pulse Sequence         | zgpg30               |                      |
|                        |                                                                                                                                    | Spectrum Offset (Hz)   | 13830.7256           |                      |

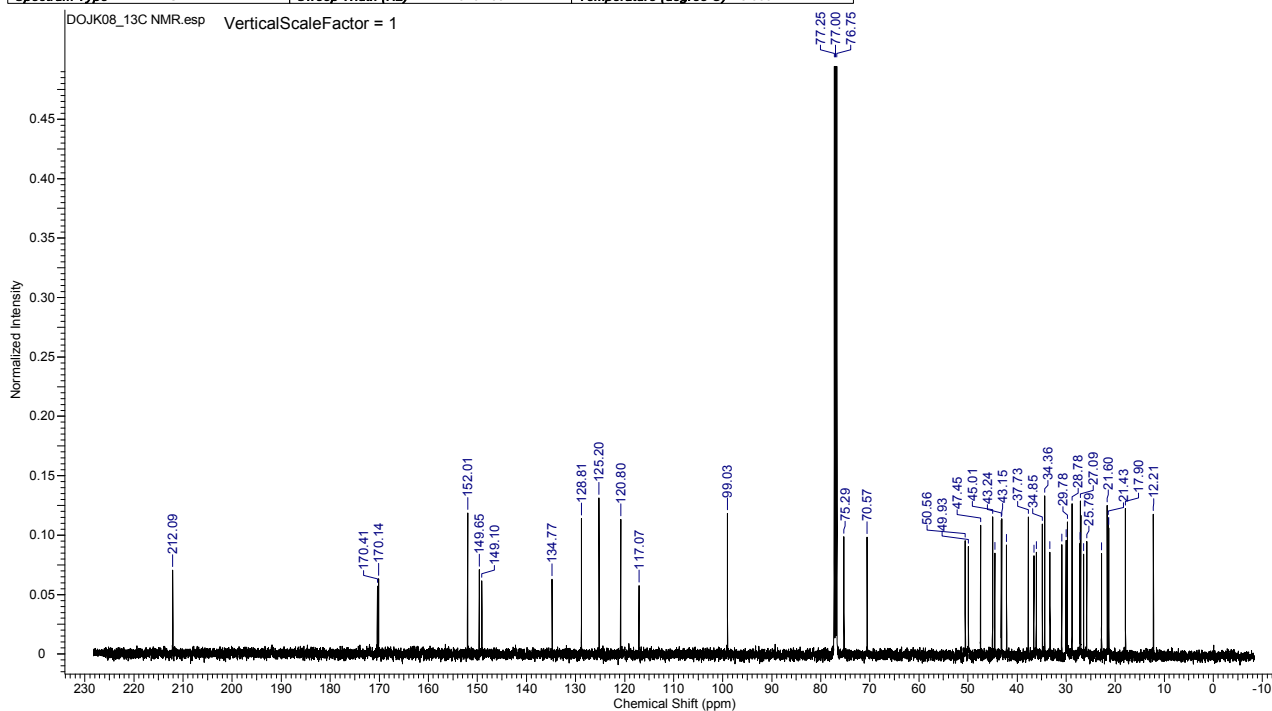

**Compound 36(DO174):**  $^1\text{H}$  NMR spectrum (200 MHz): HPLC purity: method A: RT 2.088, area 98.43 %; method C: RT 12.072, area 99.24 %.

2/25/2014 1:03:56 PM

| Number of Nuclei 0 H's |                                                                                                                                     |                |              |                      |           |                        |                     |
|------------------------|-------------------------------------------------------------------------------------------------------------------------------------|----------------|--------------|----------------------|-----------|------------------------|---------------------|
| Acquisition Time (sec) | 3.4763                                                                                                                              | Comment        | DOAA032cd6   | Date                 | Jul 16 07 | Date Stamp             | Jul 16 07           |
| File Name              | C:\Users\Dejan Opseica\Documents\Radovi\Aminohinoliniski\DO152 i ostali\Recenzija\Spektri NMR_Star1200 MHz\DO174\doaa032cd6.fid\fid |                |              |                      |           |                        |                     |
| Frequency (MHz)        | 199.97                                                                                                                              | Nucleus        | $^1\text{H}$ | Number of Transients | 32        | Original Points Count  | 10448               |
| Points Count           | 16384                                                                                                                               | Pulse Sequence | s2pul        | Receiver Gain        | 6.00      | Solvent                | CHLOROFORM-d        |
| Spectrum Offset (Hz)   | 1103.7272                                                                                                                           | Spectrum Type  | STANDARD     | Sweep Width (Hz)     | 3005.46   | Temperature (degree C) | AMBIENT TEMPERATURE |

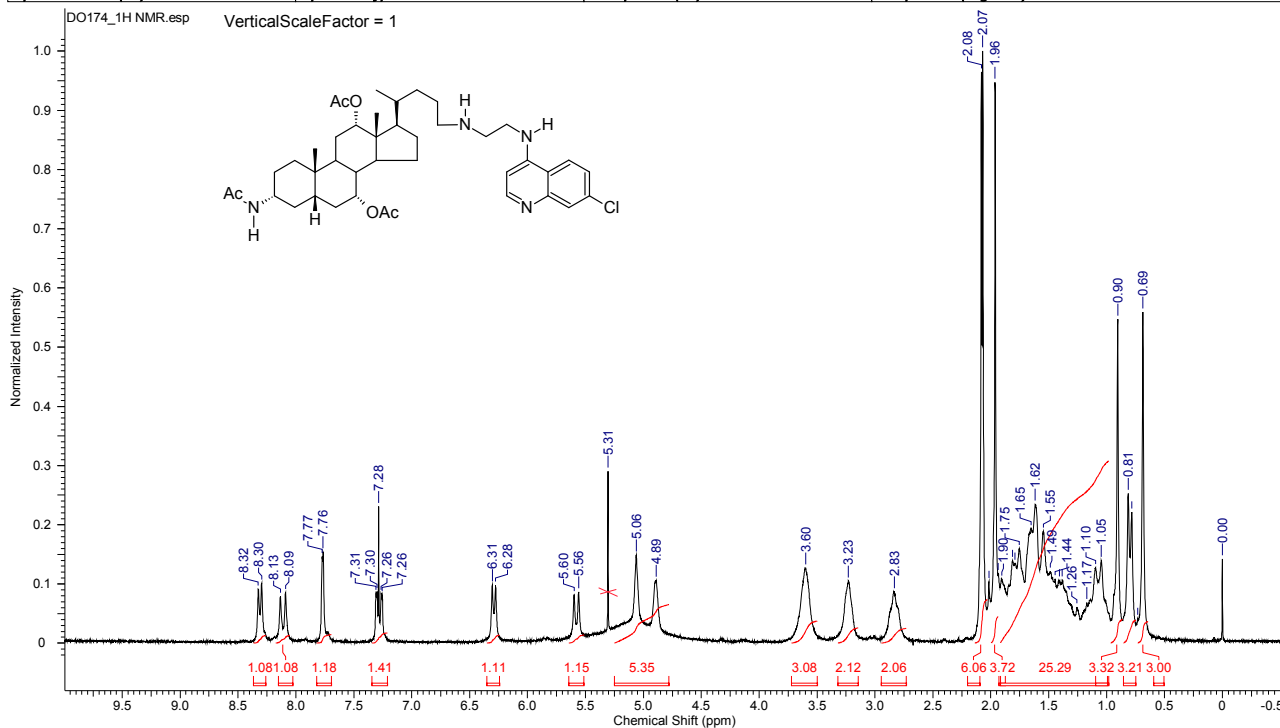

**Compound 36(DO174):**  $^{13}\text{C}$  NMR spectrum (50 MHz):

2/28/2014 11:33:13 AM

| Number of Nuclei 0 C's |                                                                                                                                     |                |                 |                      |           |                        |                     |
|------------------------|-------------------------------------------------------------------------------------------------------------------------------------|----------------|-----------------|----------------------|-----------|------------------------|---------------------|
| Acquisition Time (sec) | 1.0667                                                                                                                              | Comment        | DOAA032cd6      | Date                 | Jul 16 07 | Date Stamp             | Jul 16 07           |
| File Name              | C:\Users\Dejan Opseica\Documents\Radovi\Aminohinoliniski\DO152 i ostali\Recenzija\Spektri NMR_Star1200 MHz\DO174\doaa032cd6.fid\fid |                |                 |                      |           |                        |                     |
| Frequency (MHz)        | 50.29                                                                                                                               | Nucleus        | $^{13}\text{C}$ | Number of Transients | 3399      | Original Points Count  | 16000               |
| Points Count           | 16384                                                                                                                               | Pulse Sequence | s2pul           | Receiver Gain        | 25.00     | Solvent                | CHLOROFORM-d        |
| Spectrum Offset (Hz)   | 4814.7378                                                                                                                           | Spectrum Type  | STANDARD        | Sweep Width (Hz)     | 15000.00  | Temperature (degree C) | AMBIENT TEMPERATURE |

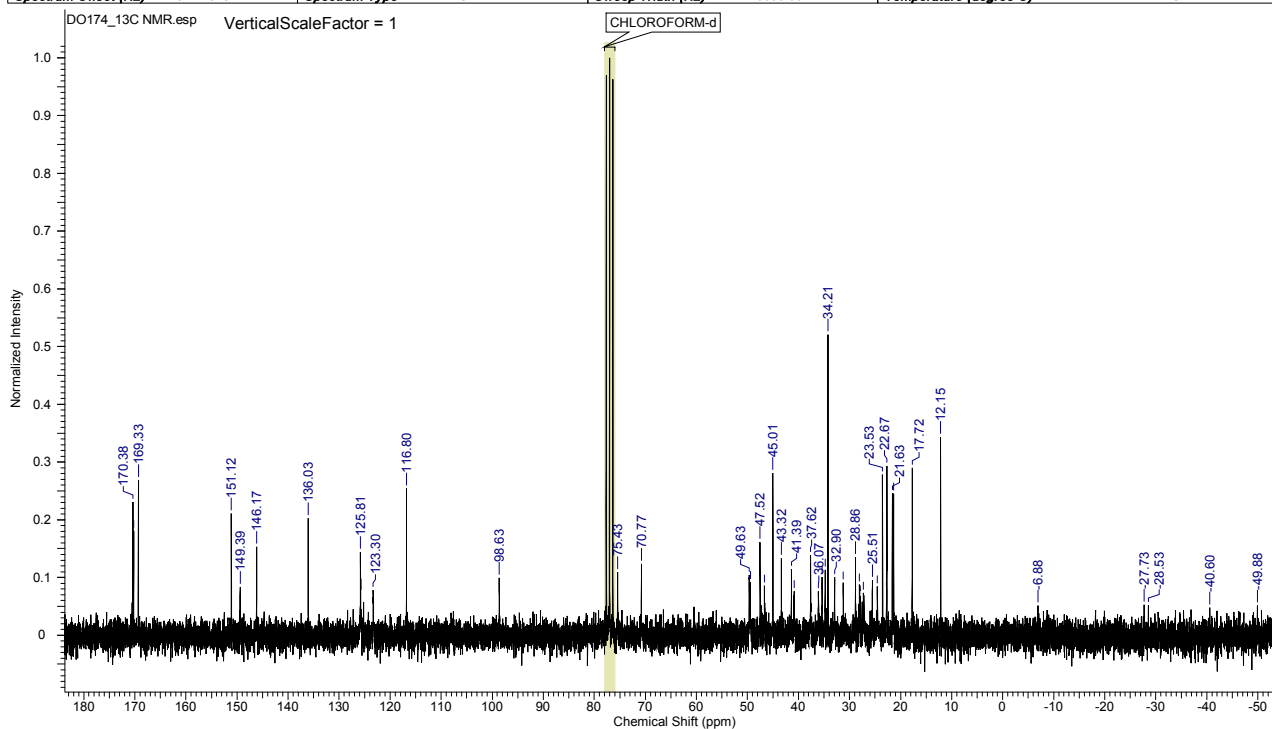

Compound 36 (DO174):  $^1\text{H}$  NMR spectrum (500 MHz):

2/25/2014 1:10:23 PM

| Number of Nuclei 0 H's |                                                                                                                    |                   |                                   |                        |                      |
|------------------------|--------------------------------------------------------------------------------------------------------------------|-------------------|-----------------------------------|------------------------|----------------------|
| Acquisition Time (sec) | 2.1823                                                                                                             | Comment           | 5 mm BBO BB-1H/D Z-GRD Z8007/0118 | Date                   | 19 Feb 2014 10:55:12 |
| Date Stamp             | 19 Feb 2014 10:55:12                                                                                               |                   |                                   |                        |                      |
| File Name              | C:\Users\Dejan Ospenica\Documents\Radovi\Aminohinoliniski\DO152\ostali\Recenzija\Spektri NMR nov\do174\1\data\111r |                   |                                   |                        |                      |
| Frequency (MHz)        | 500.26                                                                                                             | Nucleus           | $^1\text{H}$                      | Number of Transients   | 16                   |
| Original Points Count  | 16384                                                                                                              | Owner             | nmsu                              | Points Count           | 32768                |
| Receiver Gain          | 362.00                                                                                                             | SW(cyclical) (Hz) | 7507.51                           | Solvent                | CHLOROFORM-d         |
| Spectrum Type          | STANDARD                                                                                                           | Sweep Width (Hz)  | 7507.28                           | Temperature (degree C) | 25.000               |
|                        |                                                                                                                    |                   |                                   | Origin                 | spect                |
|                        |                                                                                                                    |                   |                                   | Pulse Sequence         | zg30                 |
|                        |                                                                                                                    |                   |                                   | Spectrum Offset (Hz)   | 3489.8513            |

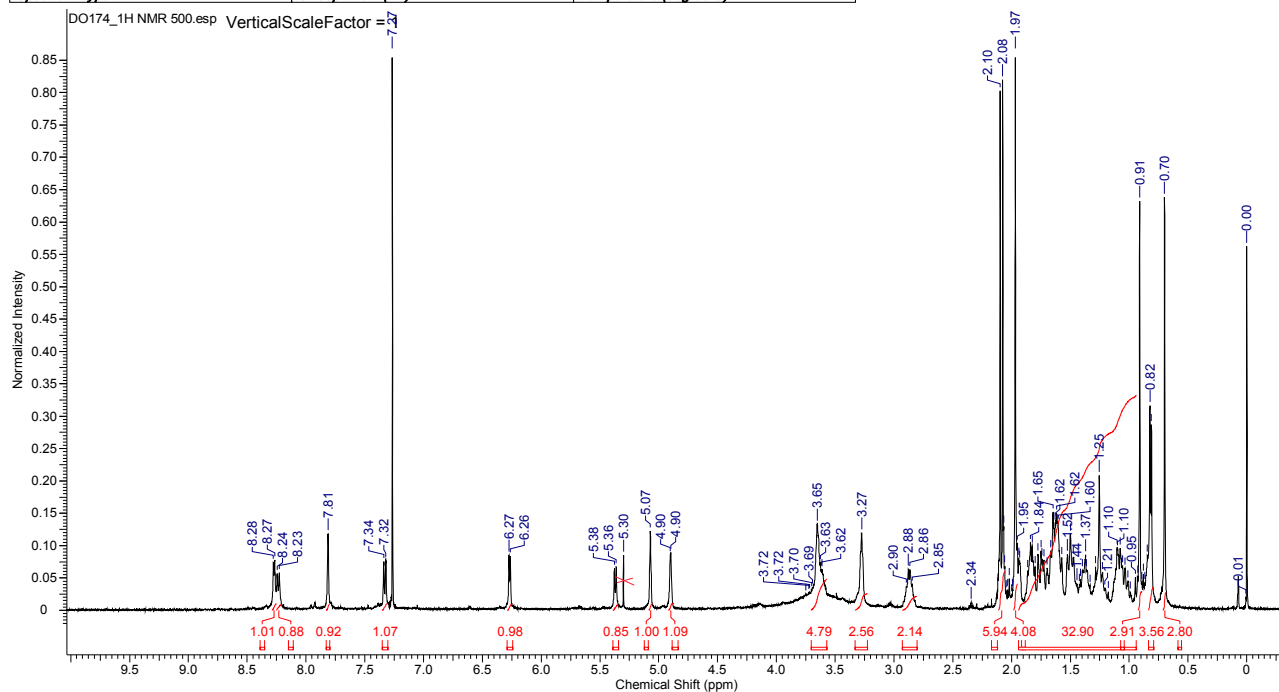Compound 36 (DO174):  $^{13}\text{C}$  NMR spectrum (125 MHz):

2/25/2014 1:11:26 PM

| Number of Nuclei 0 C's |                                                                                                                    |                   |                                   |                        |                      |
|------------------------|--------------------------------------------------------------------------------------------------------------------|-------------------|-----------------------------------|------------------------|----------------------|
| Acquisition Time (sec) | 0.5505                                                                                                             | Comment           | 5 mm BBO BB-1H/D Z-GRD Z8007/0118 | Date                   | 20 Feb 2014 09:53:20 |
| Date Stamp             | 20 Feb 2014 09:53:20                                                                                               |                   |                                   |                        |                      |
| File Name              | C:\Users\Dejan Ospenica\Documents\Radovi\Aminohinoliniski\DO152\ostali\Recenzija\Spektri NMR nov\do174\2\data\111r |                   |                                   |                        |                      |
| Frequency (MHz)        | 125.79                                                                                                             | Nucleus           | $^{13}\text{C}$                   | Number of Transients   | 700                  |
| Original Points Count  | 16384                                                                                                              | Owner             | nmsu                              | Points Count           | 65536                |
| Receiver Gain          | 2050.00                                                                                                            | SW(cyclical) (Hz) | 29761.90                          | Solvent                | CHLOROFORM-d         |
| Spectrum Type          | STANDARD                                                                                                           | Sweep Width (Hz)  | 29761.45                          | Temperature (degree C) | 25.300               |
|                        |                                                                                                                    |                   |                                   | Origin                 | spect                |
|                        |                                                                                                                    |                   |                                   | Pulse Sequence         | zgpg30               |
|                        |                                                                                                                    |                   |                                   | Spectrum Offset (Hz)   | 13830.8887           |

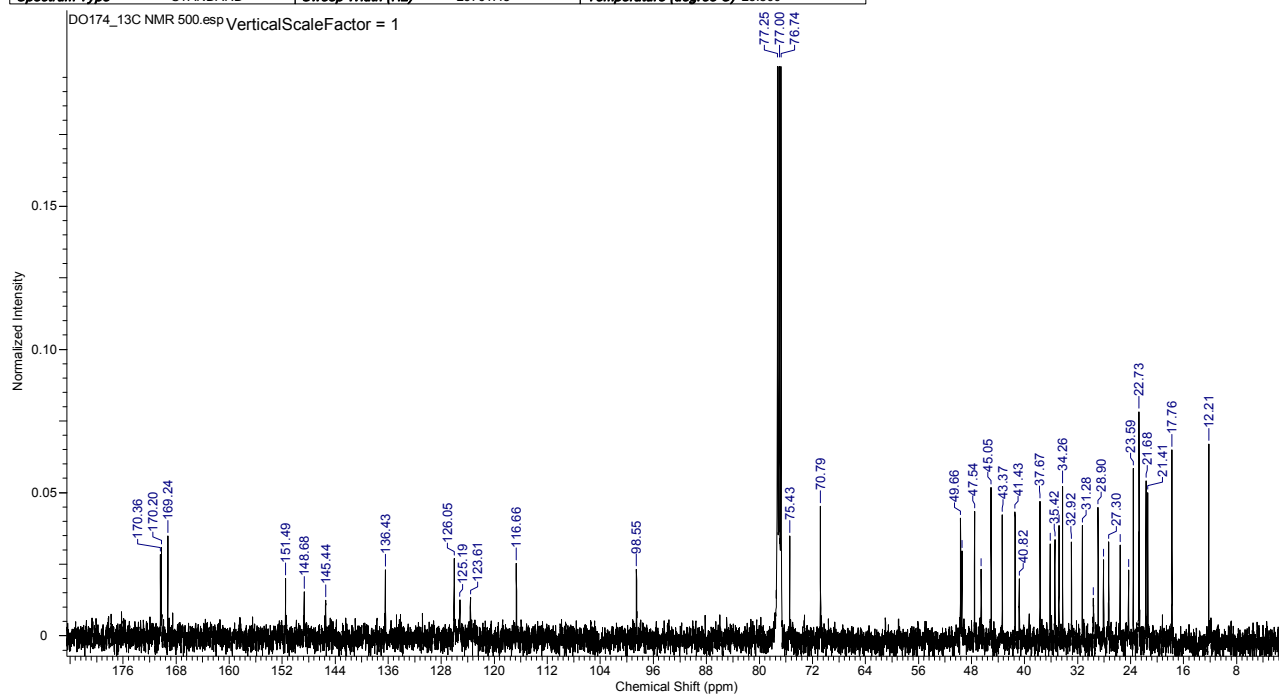

**Compound 37 (DO194):  $^1\text{H}$  NMR spectrum (500 MHz):** HPLC purity: method A: RT 1.792, area 99.09 %; method C: RT=13.145, area 95.23 %.

2/28/2014 12:10:35 PM

| Number of Nuclei 0 H's |                                                                                                                             |                   |                      |                        |              |                      |           |
|------------------------|-----------------------------------------------------------------------------------------------------------------------------|-------------------|----------------------|------------------------|--------------|----------------------|-----------|
| Acquisition Time (sec) | 3.1261                                                                                                                      | Date              | 18 Sep 2009 13:22:40 |                        |              |                      |           |
| File Name              | C:\Users\Dejan Osenica\Documents\Radovi\Aminohinolinski\DO152 i ostali\Recenzija\Spektri NMR_Star\500 MHz\DO194\1\data\1\1r |                   | Date Stamp           | 18 Sep 2009 13:22:40   |              |                      |           |
| Frequency (MHz)        | 500.26                                                                                                                      | Nucleus           | $^1\text{H}$         | Number of Transients   | 16           | Origin               | spect     |
| Original Points Count  | 16384                                                                                                                       | Owner             | nmsru                | Points Count           | 32768        | Pulse Sequence       | zq30      |
| Receiver Gain          | 181.00                                                                                                                      | SW(cyclical) (Hz) | 5241.09              | Solvent                | CHLOROFORM-d | Spectrum Offset (Hz) | 2129.9771 |
| Spectrum Type          | STANDARD                                                                                                                    | Sweep Width (Hz)  | 5240.93              | Temperature (degree C) | 25.000       |                      |           |

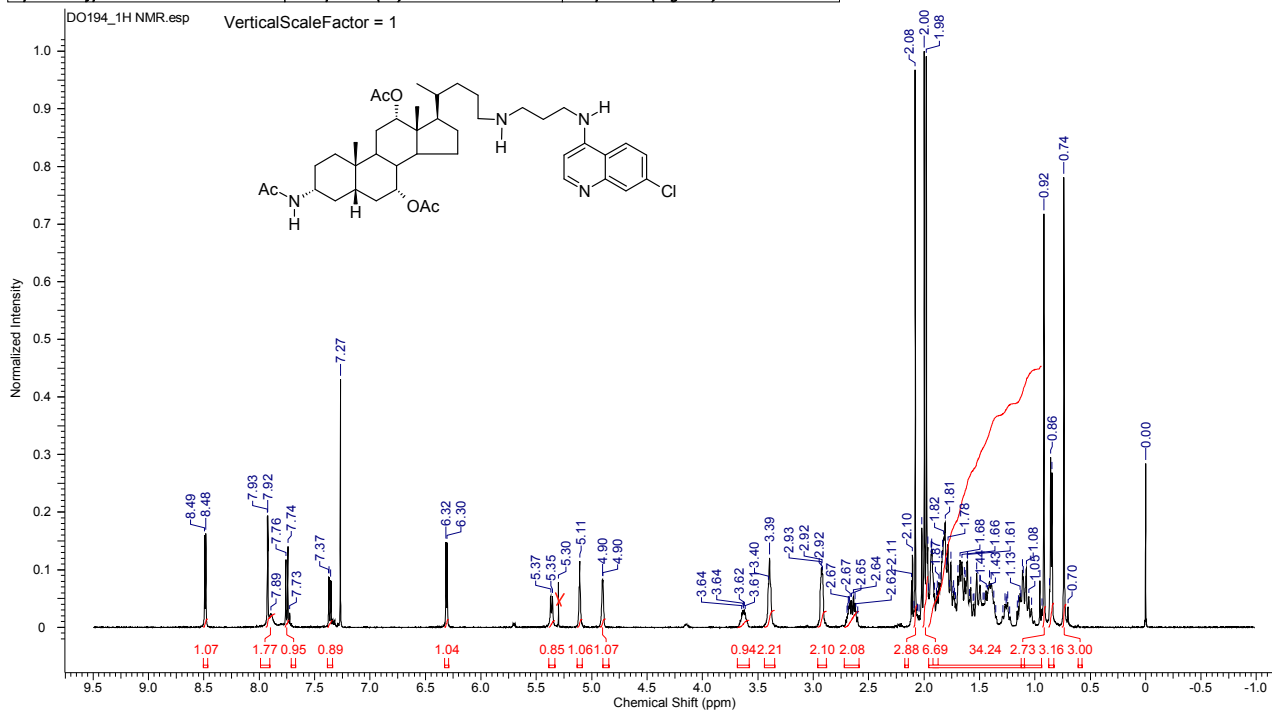

**Compound 37 (DO194):  $^{13}\text{C}$  NMR spectrum (125 MHz):**

2/25/2014 1:31:33 PM

| Number of Nuclei 0 C's |                                                                                                                             |                   |                      |                        |              |                      |            |
|------------------------|-----------------------------------------------------------------------------------------------------------------------------|-------------------|----------------------|------------------------|--------------|----------------------|------------|
| Acquisition Time (sec) | 0.5505                                                                                                                      | Date              | 18 Sep 2009 13:26:56 |                        |              |                      |            |
| File Name              | C:\Users\Dejan Osenica\Documents\Radovi\Aminohinolinski\DO152 i ostali\Recenzija\Spektri NMR_Star\500 MHz\DO194\2\data\1\1r |                   | Date Stamp           | 18 Sep 2009 13:26:56   |              |                      |            |
| Frequency (MHz)        | 125.79                                                                                                                      | Nucleus           | $^{13}\text{C}$      | Number of Transients   | 1815         | Origin               | spect      |
| Original Points Count  | 16384                                                                                                                       | Owner             | nmsru                | Points Count           | 32768        | Pulse Sequence       | zqpg30     |
| Receiver Gain          | 1030.00                                                                                                                     | SW(cyclical) (Hz) | 29761.90             | Solvent                | CHLOROFORM-d | Spectrum Offset (Hz) | 13832.5488 |
| Spectrum Type          | STANDARD                                                                                                                    | Sweep Width (Hz)  | 29761.00             | Temperature (degree C) | 25.000       |                      |            |

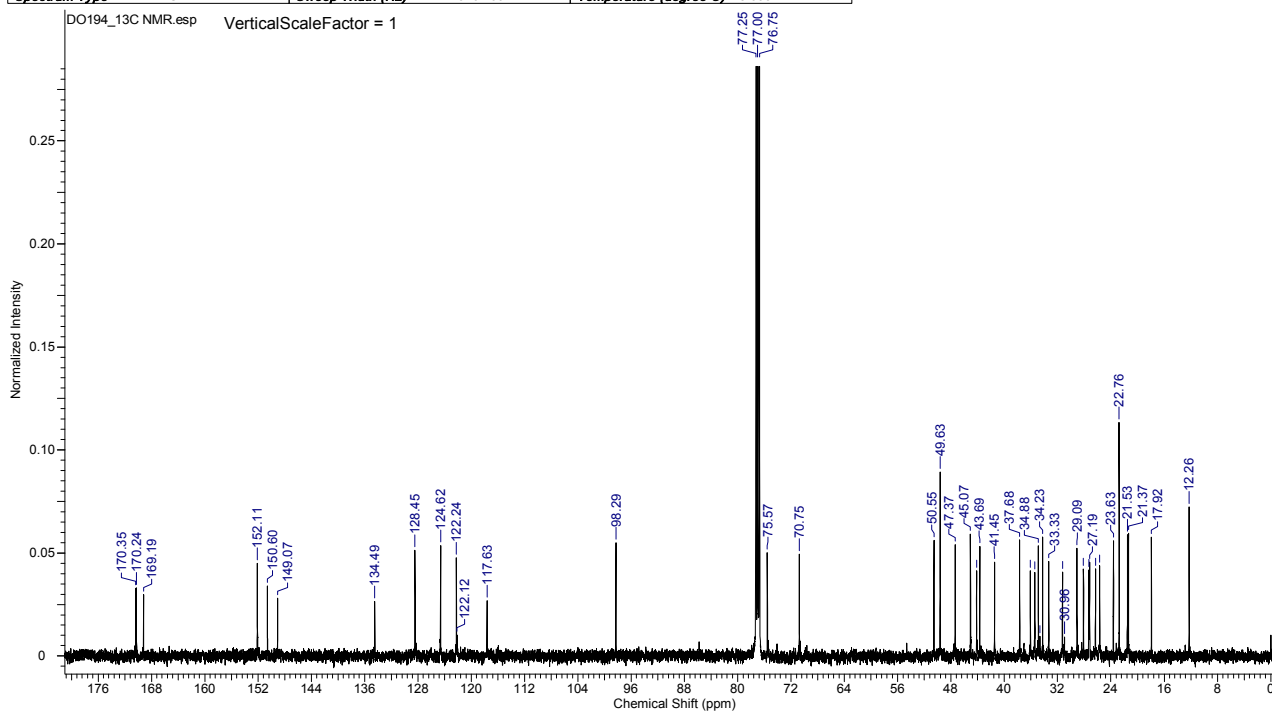

**Compound 38 (DO195):  $^1\text{H}$  NMR spectrum (200 MHz):** HPLC purity: method A: RT 1.884, area 98.92 %; method C: RT 10.467, area 98.11 %.

2/25/2014 1:34:49 PM

| Number of Nuclei 0 H's |                                                                                                                                 |                |              |                        |                     |
|------------------------|---------------------------------------------------------------------------------------------------------------------------------|----------------|--------------|------------------------|---------------------|
| Acquisition Time (sec) | 1.3913                                                                                                                          | Comment        | DO195        | Date                   | Oct 28 09           |
| File Name              | C:\Users\Dejan\Openical\Documents\Radovi\Aminohinoliniski\DO152\ostali\Recenzija\Spektri NMR_Star1\200 MHz\DO195\hdo195.fid\fid |                |              |                        |                     |
| Frequency (MHz)        | 199.97                                                                                                                          | Nucleus        | $^1\text{H}$ | Number of Transients   | 128                 |
| Points Count           | 8192                                                                                                                            | Pulse Sequence | s2pul        | Receiver Gain          | 11.00               |
| Spectrum Offset (Hz)   | 1686.7415                                                                                                                       | Spectrum Type  | STANDARD     | Sweep Width (Hz)       | 4600.00             |
|                        |                                                                                                                                 |                |              | Solvent                | CHLOROFORM-d        |
|                        |                                                                                                                                 |                |              | Temperature (degree C) | AMBIENT TEMPERATURE |

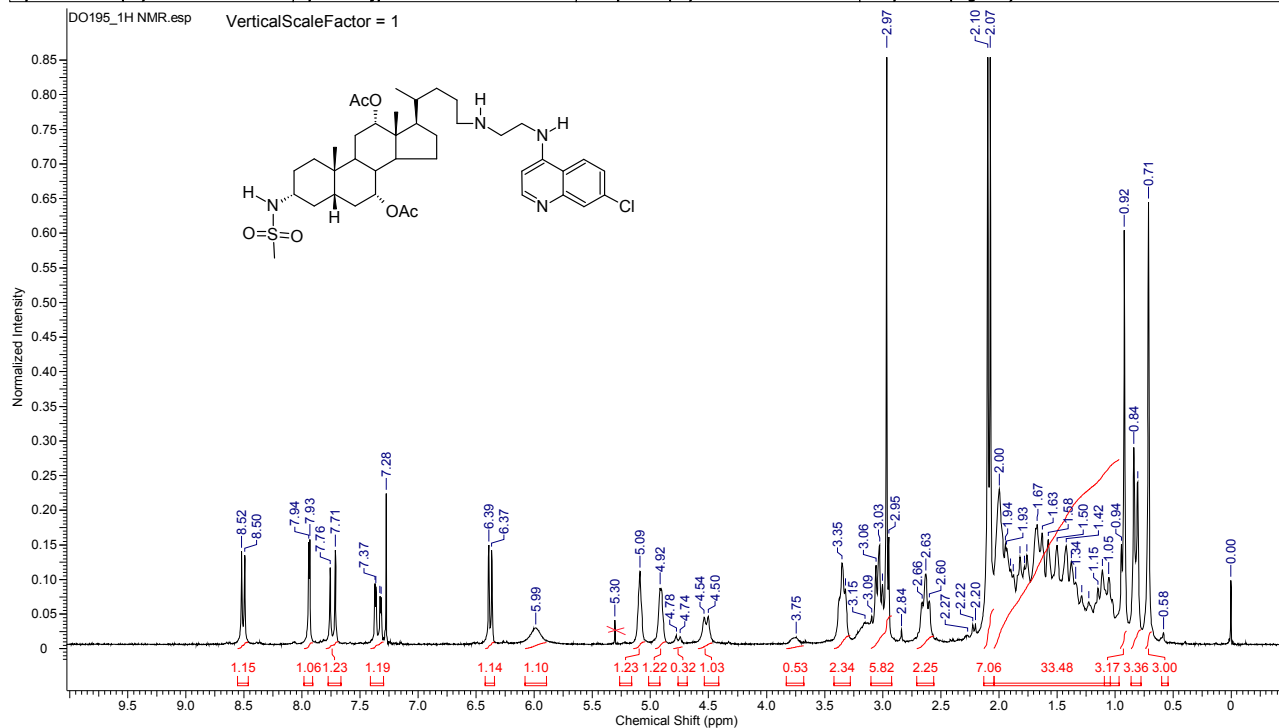

**Compound 38 (DO195):  $^{13}\text{C}$  NMR spectrum (50 MHz):**

2/28/2014 12:30:31 PM

| Number of Nuclei 0 C's |                                                                                                                                 |                |                 |                        |                     |
|------------------------|---------------------------------------------------------------------------------------------------------------------------------|----------------|-----------------|------------------------|---------------------|
| Acquisition Time (sec) | 1.0667                                                                                                                          | Comment        | DO195           | Date                   | Oct 28 09           |
| File Name              | C:\Users\Dejan\Openical\Documents\Radovi\Aminohinoliniski\DO152\ostali\Recenzija\Spektri NMR_Star1\200 MHz\DO195\cdo195.fid\fid |                |                 |                        |                     |
| Frequency (MHz)        | 50.29                                                                                                                           | Nucleus        | $^{13}\text{C}$ | Number of Transients   | 2797                |
| Points Count           | 16384                                                                                                                           | Pulse Sequence | s2pul           | Receiver Gain          | 25.00               |
| Spectrum Offset (Hz)   | 4814.7378                                                                                                                       | Spectrum Type  | STANDARD        | Sweep Width (Hz)       | 15000.00            |
|                        |                                                                                                                                 |                |                 | Solvent                | CHLOROFORM-d        |
|                        |                                                                                                                                 |                |                 | Temperature (degree C) | AMBIENT TEMPERATURE |

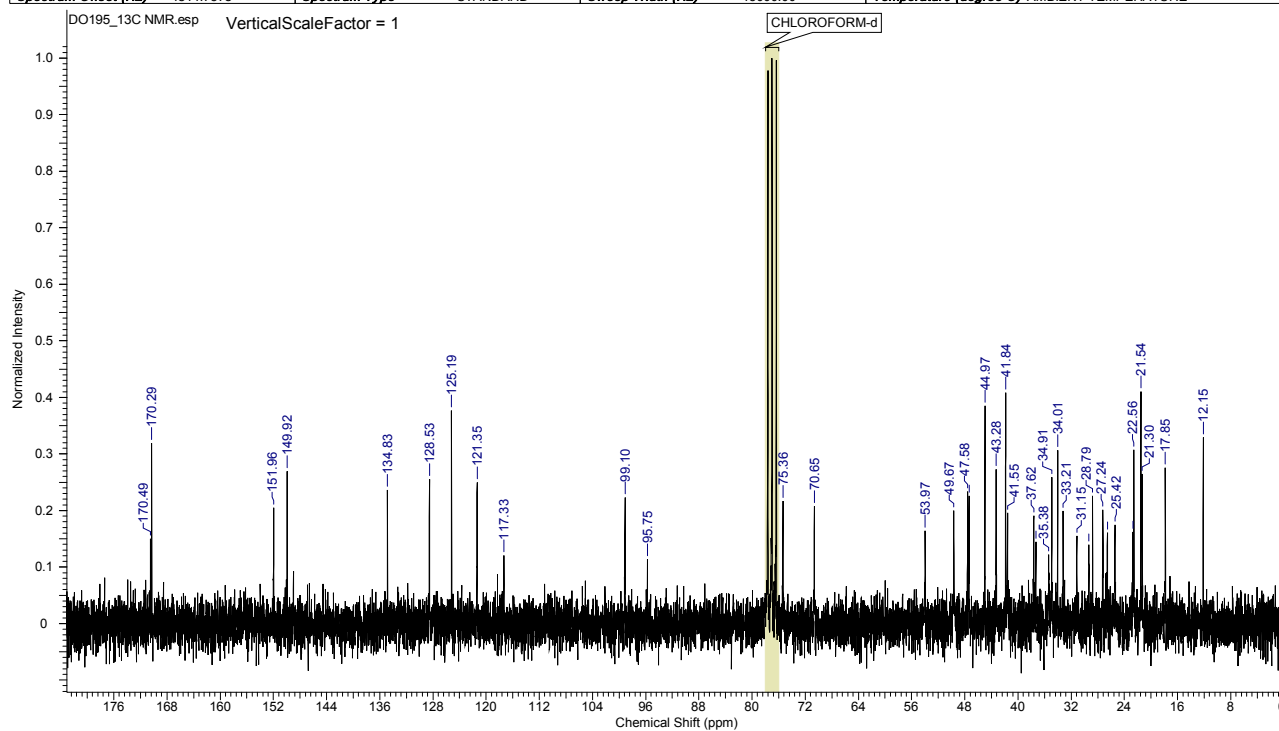



Compound 38 (DO195): <sup>1</sup>H NMR spectrum (500 MHz):

2/25/2014 1:38:48 PM

| Number of Nuclei 0 H's |                                                                                                                           |                        |                                   |
|------------------------|---------------------------------------------------------------------------------------------------------------------------|------------------------|-----------------------------------|
| Acquisition Time (sec) | 2.1823                                                                                                                    | Comment                | 5 mm BBO BB-1H/D Z-GRD Z8007/0118 |
| Date Stamp             | 22 Feb 2014 10:53:04                                                                                                      |                        |                                   |
| File Name              | C:\Users\Dejan Opsenica\Documents\Radovi\Aminohinoliniski\DO152 i ostali\Recenzija\Spektri NMR nov\do195-nov\1\pdata\1\1r |                        |                                   |
| Frequency (MHz)        | 500.26                                                                                                                    | Nucleus                | <sup>1</sup> H                    |
| Original Points Count  | 16384                                                                                                                     | Owner                  | nmsu                              |
| Receiver Gain          | 362.00                                                                                                                    | Points Count           | 32768                             |
| Spectrum Type          | STANDARD                                                                                                                  | Solvent                | CHLOROFORM-d                      |
|                        |                                                                                                                           | Sweep Width (Hz)       | 7507.51                           |
|                        |                                                                                                                           | Temperature (degree C) | 25.000                            |
|                        |                                                                                                                           | Spectrum Offset (Hz)   | 3488.3303                         |

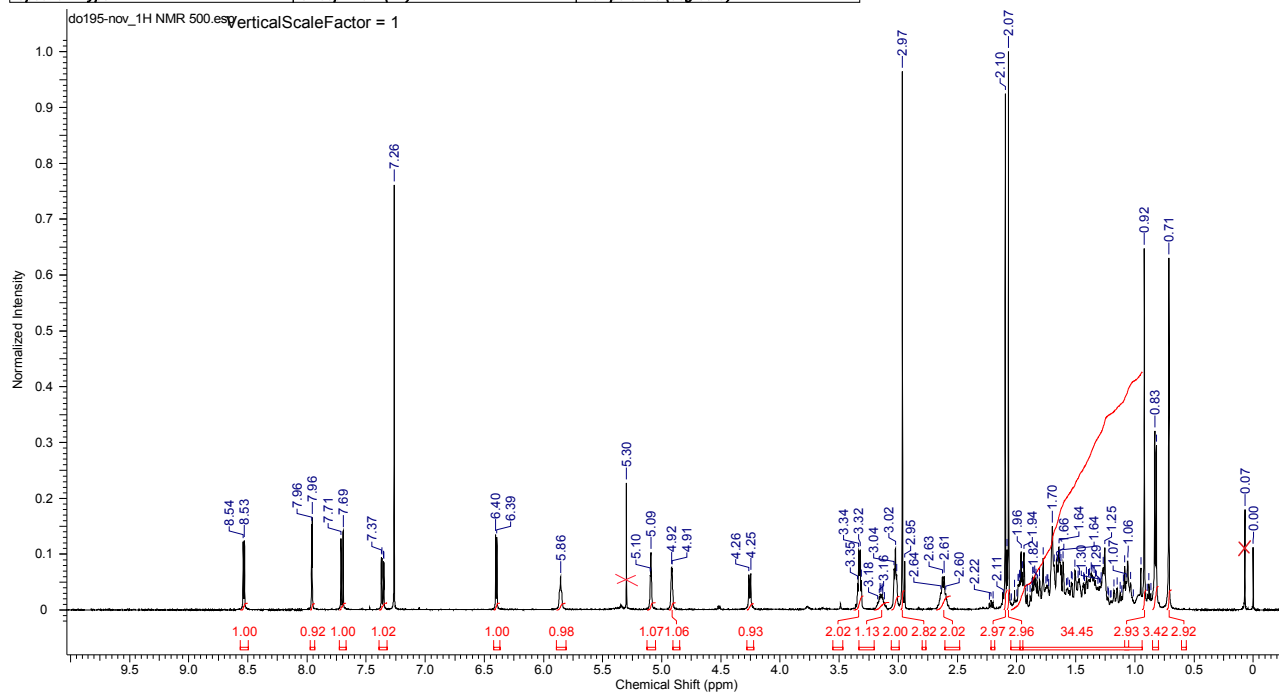Compound 38 (DO195): <sup>13</sup>C NMR spectrum (125 MHz):

2/28/2014 12:52:01 PM

| Number of Nuclei 0 C's |                                                                                                                           |                        |                                   |
|------------------------|---------------------------------------------------------------------------------------------------------------------------|------------------------|-----------------------------------|
| Acquisition Time (sec) | 0.5505                                                                                                                    | Comment                | 5 mm BBO BB-1H/D Z-GRD Z8007/0118 |
| Date Stamp             | 22 Feb 2014 10:57:20                                                                                                      |                        |                                   |
| File Name              | C:\Users\Dejan Opsenica\Documents\Radovi\Aminohinoliniski\DO152 i ostali\Recenzija\Spektri NMR nov\do195-nov\2\pdata\1\1r |                        |                                   |
| Frequency (MHz)        | 125.79                                                                                                                    | Nucleus                | <sup>13</sup> C                   |
| Owner                  | nmsu                                                                                                                      | Points Count           | 65536                             |
| SW(cyclical) (Hz)      | 29761.90                                                                                                                  | Solvent                | CHLOROFORM-d                      |
| Spectrum Type          | STANDARD                                                                                                                  | Temperature (degree C) | 25.100                            |
|                        |                                                                                                                           | Spectrum Offset (Hz)   | 13833.2148                        |
|                        |                                                                                                                           | Original Points Count  | 16384                             |
|                        |                                                                                                                           | Receiver Gain          | 2050.00                           |

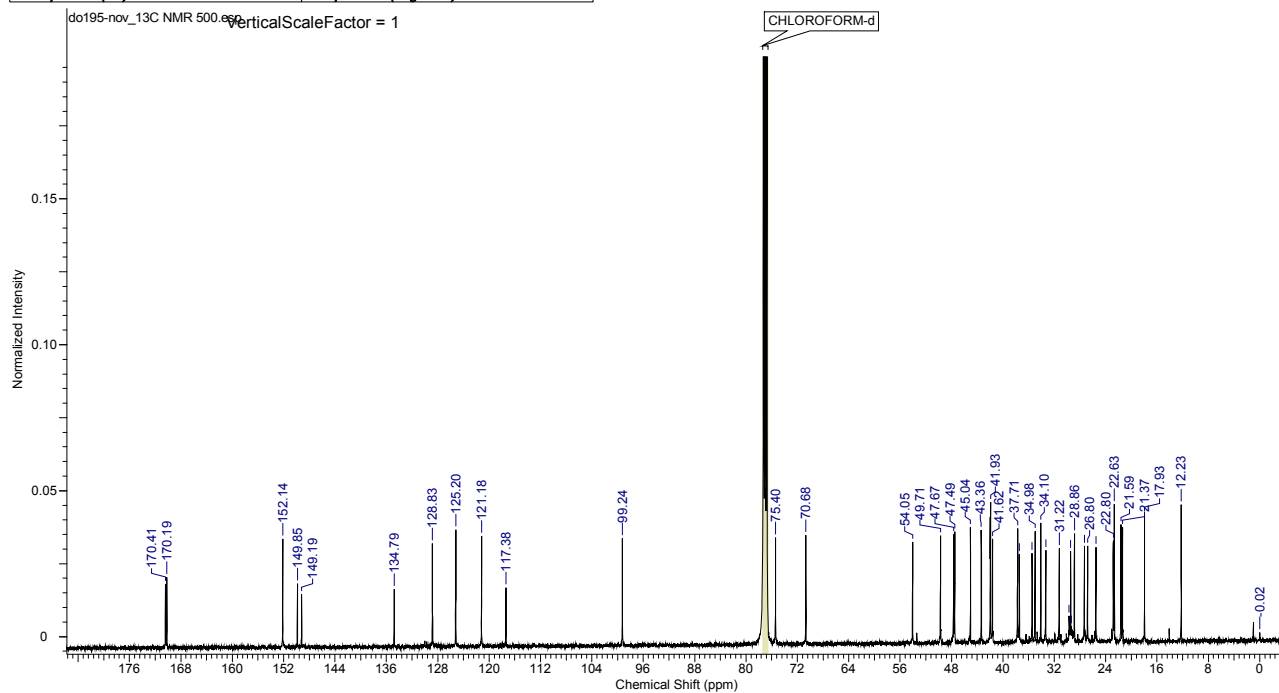

**Compound 39 (DO196):  $^1\text{H}$  NMR spectrum (200 MHz):** HPLC purity: method A: RT 1.773, area 98.86 %; method B: RT 1.843, area 98.21 %.

2/26/2014 4:51:59 PM

| Number of Nuclei 0 H's |                                                                                                                            |                |              |                      |           |                        |                     |
|------------------------|----------------------------------------------------------------------------------------------------------------------------|----------------|--------------|----------------------|-----------|------------------------|---------------------|
| Acquisition Time (sec) | 1.3913                                                                                                                     | Comment        | DO196        | Date                 | Dec 17 09 | Date Stamp             | Dec 17 09           |
| File Name              | C:\Users\Dejan Opsenica\Documents\Radovi\Aminohinoliniski\DO152 i ostali\Recenzija\Spektri NMR_Ostalo\DO196\hdo196.fid\fid |                |              |                      |           |                        |                     |
| Frequency (MHz)        | 199.97                                                                                                                     | Nucleus        | $^1\text{H}$ | Number of Transients | 128       | Original Points Count  | 6400                |
| Points Count           | 8192                                                                                                                       | Pulse Sequence | s2pul        | Receiver Gain        | 11.00     | Solvent                | CHLOROFORM-d        |
| Spectrum Offset (Hz)   | 1686.7415                                                                                                                  | Spectrum Type  | STANDARD     | Sweep Width (Hz)     | 4600.00   | Temperature (degree C) | AMBIENT TEMPERATURE |

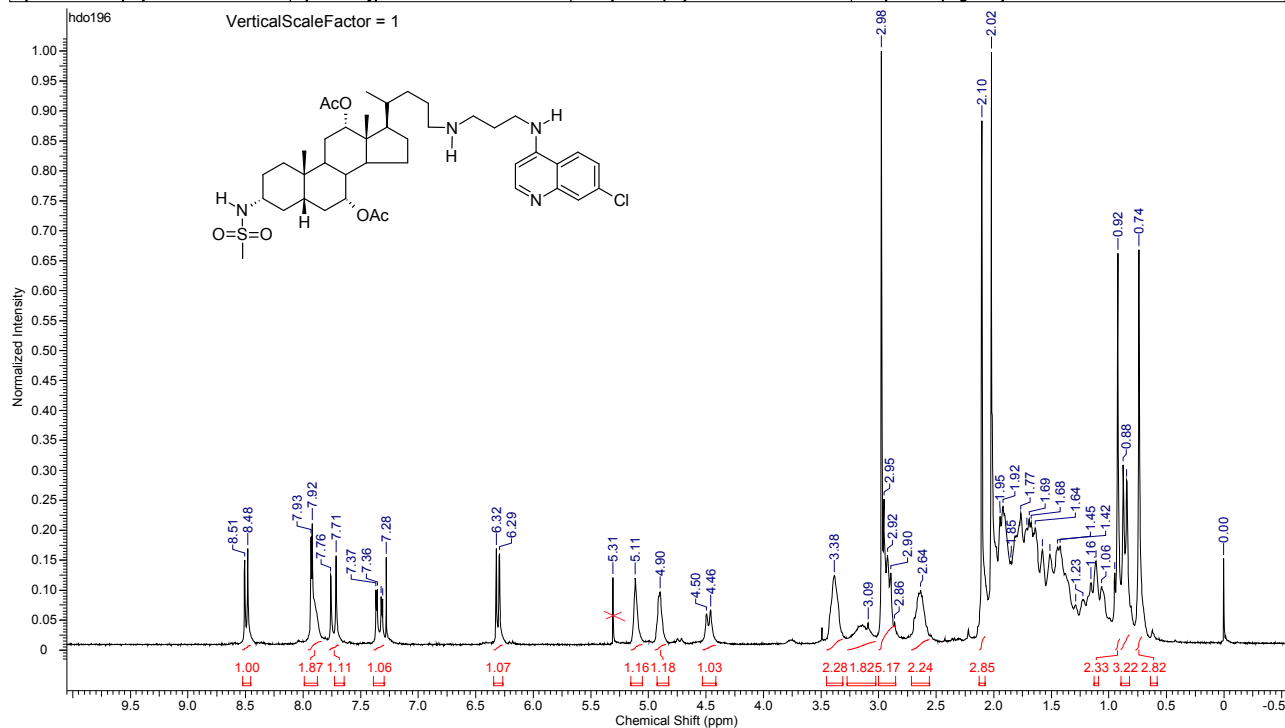

**Compound 39 (DO196):  $^{13}\text{C}$  NMR spectrum (50 MHz):**

2/28/2014 12:59:50 PM

| Number of Nuclei 0 C's |                                                                                                                            |                |                 |                      |           |                        |                     |
|------------------------|----------------------------------------------------------------------------------------------------------------------------|----------------|-----------------|----------------------|-----------|------------------------|---------------------|
| Acquisition Time (sec) | 1.0667                                                                                                                     | Comment        | DO196           | Date                 | Dec 17 09 | Date Stamp             | Dec 17 09           |
| File Name              | C:\Users\Dejan Opsenica\Documents\Radovi\Aminohinoliniski\DO152 i ostali\Recenzija\Spektri NMR_Ostalo\DO196\cdo196.fid\fid |                |                 |                      |           |                        |                     |
| Frequency (MHz)        | 50.29                                                                                                                      | Nucleus        | $^{13}\text{C}$ | Number of Transients | 16400     | Original Points Count  | 16000               |
| Points Count           | 16384                                                                                                                      | Pulse Sequence | s2pul           | Receiver Gain        | 25.00     | Solvent                | CHLOROFORM-d        |
| Spectrum Offset (Hz)   | 4814.7378                                                                                                                  | Spectrum Type  | STANDARD        | Sweep Width (Hz)     | 15000.00  | Temperature (degree C) | AMBIENT TEMPERATURE |

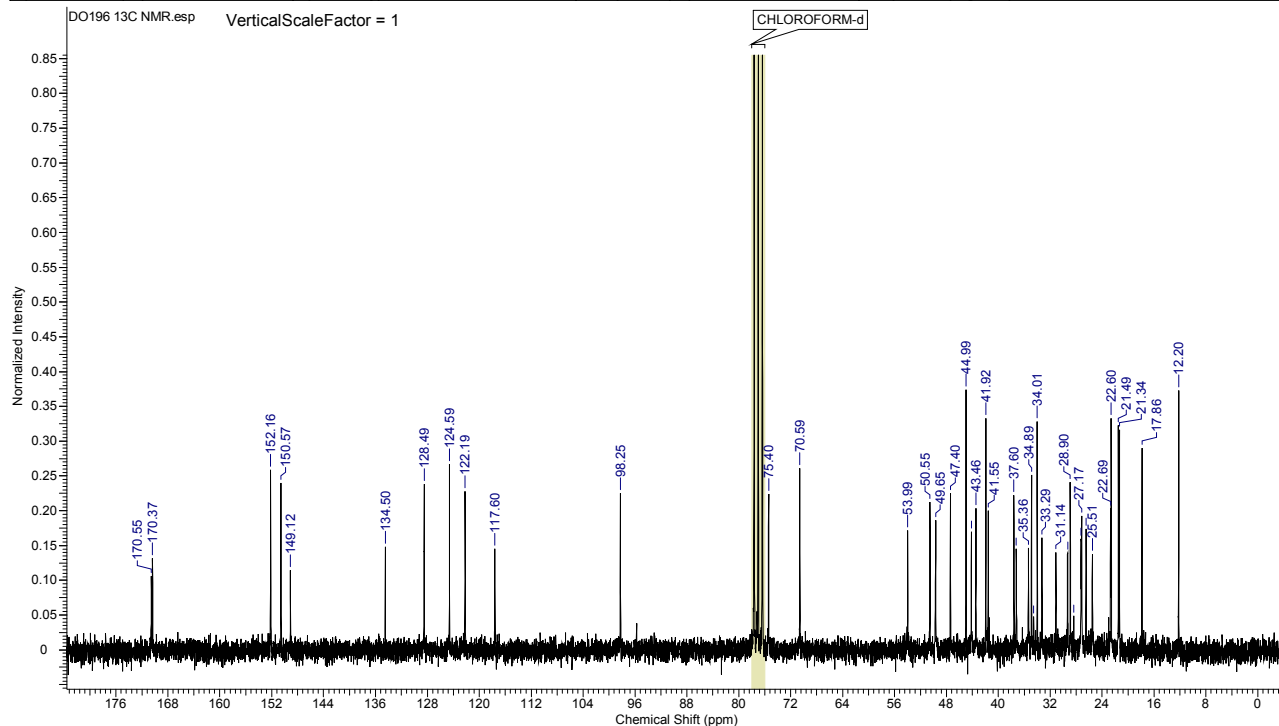

**Compound 40 (DO179):  $^1\text{H}$  NMR spectrum (500 MHz):** HPLC purity: method A: RT 2.085, area 99.22 %; method B: RT 8.856, area 95.25 %.

2/26/2014 6:46:29 PM

| Number of Nuclei 0 H's |                                                                                                                                    |                        |                      |                      |
|------------------------|------------------------------------------------------------------------------------------------------------------------------------|------------------------|----------------------|----------------------|
| Acquisition Time (sec) | 2.7263                                                                                                                             | Date                   | 03 Mar 2008 14:13:36 |                      |
| File Name              | C:\Users\Dejan Ovsenica\Documents\Radovi\Aminohinoliniski\DO152 i ostali\Recenzija\Spektri NMR_Ostalo\DO179\BGCS036d6\1\pdata\1\1r |                        | Date Stamp           | 03 Mar 2008 14:13:36 |
| Frequency (MHz)        | 500.26                                                                                                                             | Nucleus                | $^1\text{H}$         |                      |
| Original Points Count  | 16384                                                                                                                              | Owner                  | nmsu                 |                      |
| Receiver Gain          | 114.00                                                                                                                             | SW(cyclical) (Hz)      | 6009.62              |                      |
| Spectrum Type          | STANDARD                                                                                                                           | Sweep Width (Hz)       | 6009.25              |                      |
|                        |                                                                                                                                    | Points Count           | 16384                |                      |
|                        |                                                                                                                                    | Solvent                | CHLOROFORM-d         |                      |
|                        |                                                                                                                                    | Temperature (degree C) | 25.000               |                      |
|                        |                                                                                                                                    | Pulse Sequence         | zg30                 |                      |
|                        |                                                                                                                                    | Spectrum Offset (Hz)   | 2554.9321            |                      |

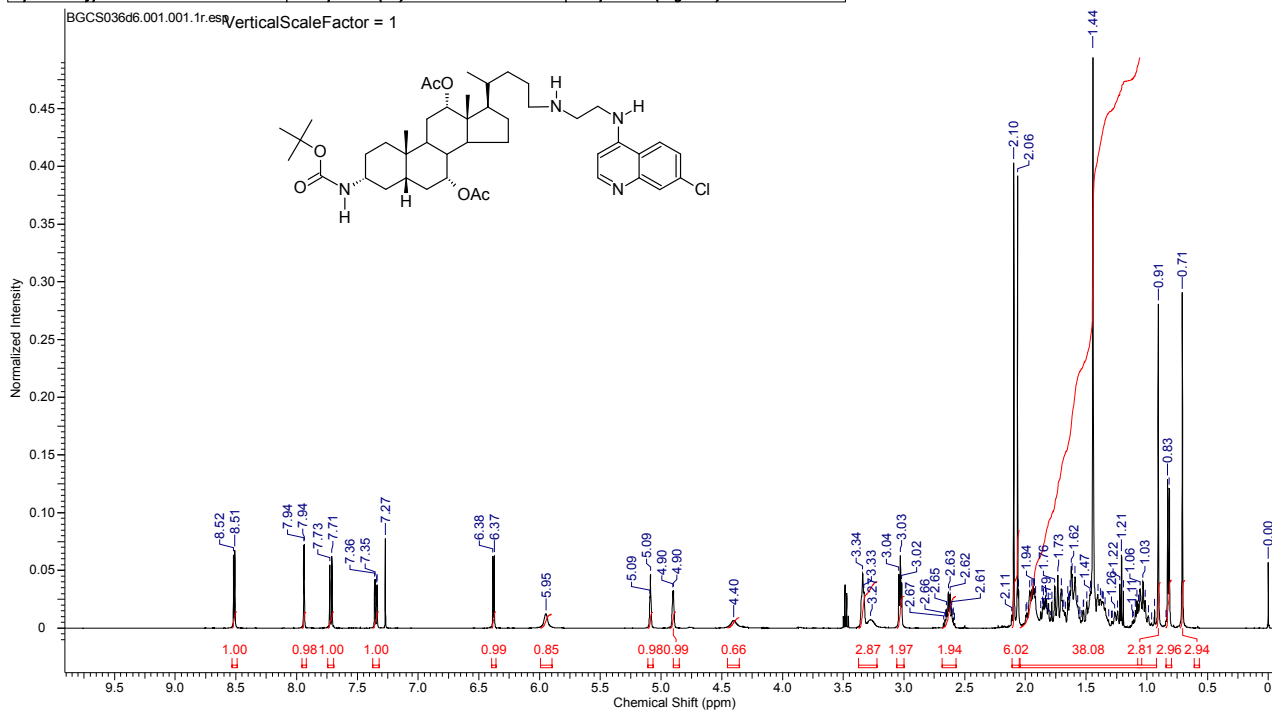

**Compound 40 (DO179):  $^{13}\text{C}$  NMR spectrum (125 MHz):**

2/26/2014 6:47:45 PM

| Number of Nuclei 0 C's |                                                                                                                                    |                        |                      |                      |
|------------------------|------------------------------------------------------------------------------------------------------------------------------------|------------------------|----------------------|----------------------|
| Acquisition Time (sec) | 1.1010                                                                                                                             | Date                   | 03 Mar 2008 14:22:08 |                      |
| File Name              | C:\Users\Dejan Ovsenica\Documents\Radovi\Aminohinoliniski\DO152 i ostali\Recenzija\Spektri NMR_Ostalo\DO179\BGCS036d6\2\pdata\1\1r |                        | Date Stamp           | 03 Mar 2008 14:22:08 |
| Frequency (MHz)        | 125.79                                                                                                                             | Nucleus                | $^{13}\text{C}$      |                      |
| Original Points Count  | 32768                                                                                                                              | Owner                  | nmsu                 |                      |
| Receiver Gain          | 1030.00                                                                                                                            | SW(cyclical) (Hz)      | 29761.90             |                      |
| Spectrum Type          | STANDARD                                                                                                                           | Sweep Width (Hz)       | 29761.00             |                      |
|                        |                                                                                                                                    | Number of Transients   | 536                  |                      |
|                        |                                                                                                                                    | Solvent                | CHLOROFORM-d         |                      |
|                        |                                                                                                                                    | Temperature (degree C) | 25.000               |                      |
|                        |                                                                                                                                    | Pulse Sequence         | zgpg30               |                      |
|                        |                                                                                                                                    | Spectrum Offset (Hz)   | 13833.4551           |                      |

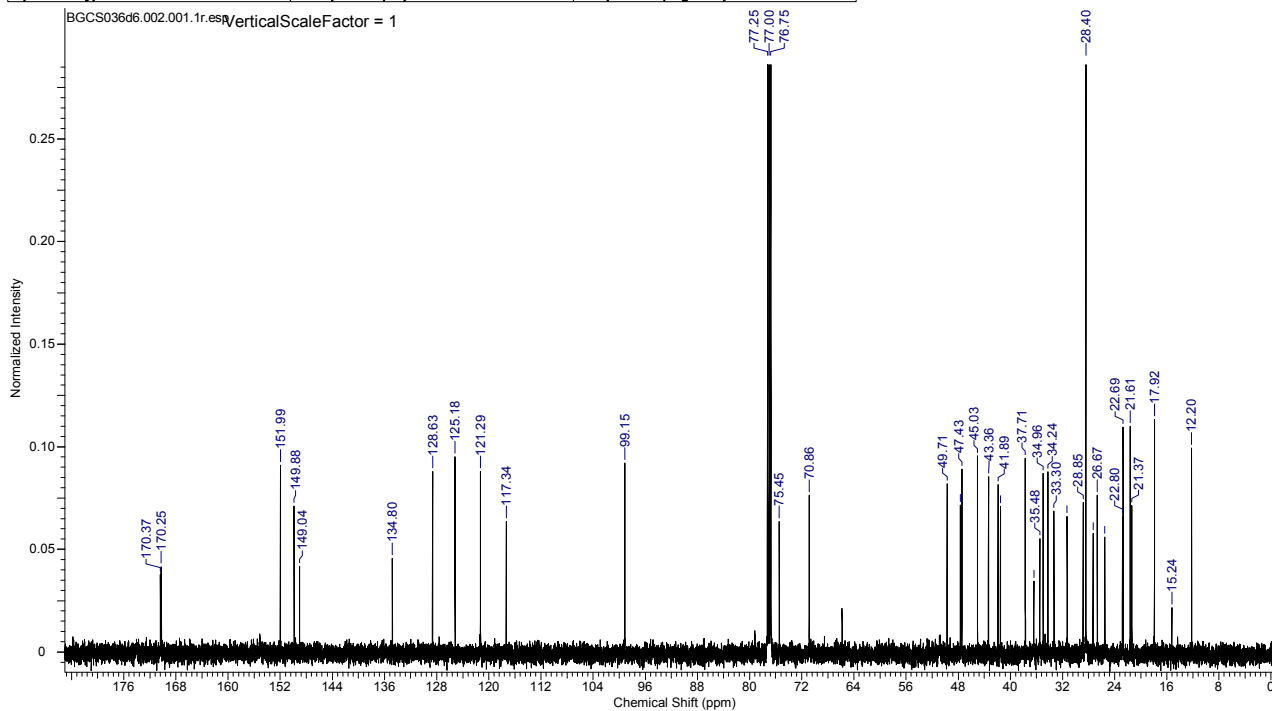

**Compound 41 (DO191):  $^1\text{H}$  NMR spectrum (200 MHz):** HPLC purity: method A: RT 1.952, area 98.07 %; method C: RT 15.915, area 98.61 %.

2/25/2014 1:45:15 PM

| Number of Nuclei 0 H's |                                                                                                                              |                |              |                      |           |                        |                     |
|------------------------|------------------------------------------------------------------------------------------------------------------------------|----------------|--------------|----------------------|-----------|------------------------|---------------------|
| Acquisition Time (sec) | 1.3913                                                                                                                       | Comment        | VF1          | Date                 | Aug 22 09 | Date Stamp             | Aug 22 09           |
| File Name              | C:\Users\Dejan Oспенica\Documents\Radovi\Aminohinoliniski\DO152 i ostali\Recenzija\Spektri NMR_Star200 MHz\DO191\hv1.fid.fid |                |              |                      |           |                        |                     |
| Frequency (MHz)        | 199.97                                                                                                                       | Nucleus        | $^1\text{H}$ | Number of Transients | 128       | Original Points Count  | 6400                |
| Points Count           | 8192                                                                                                                         | Pulse Sequence | s2pul        | Receiver Gain        | 11.00     | Solvent                | CHLOROFORM-d        |
| Spectrum Offset (Hz)   | 1686.7415                                                                                                                    | Spectrum Type  | STANDARD     | Sweep Width (Hz)     | 4600.00   | Temperature (degree C) | AMBIENT TEMPERATURE |

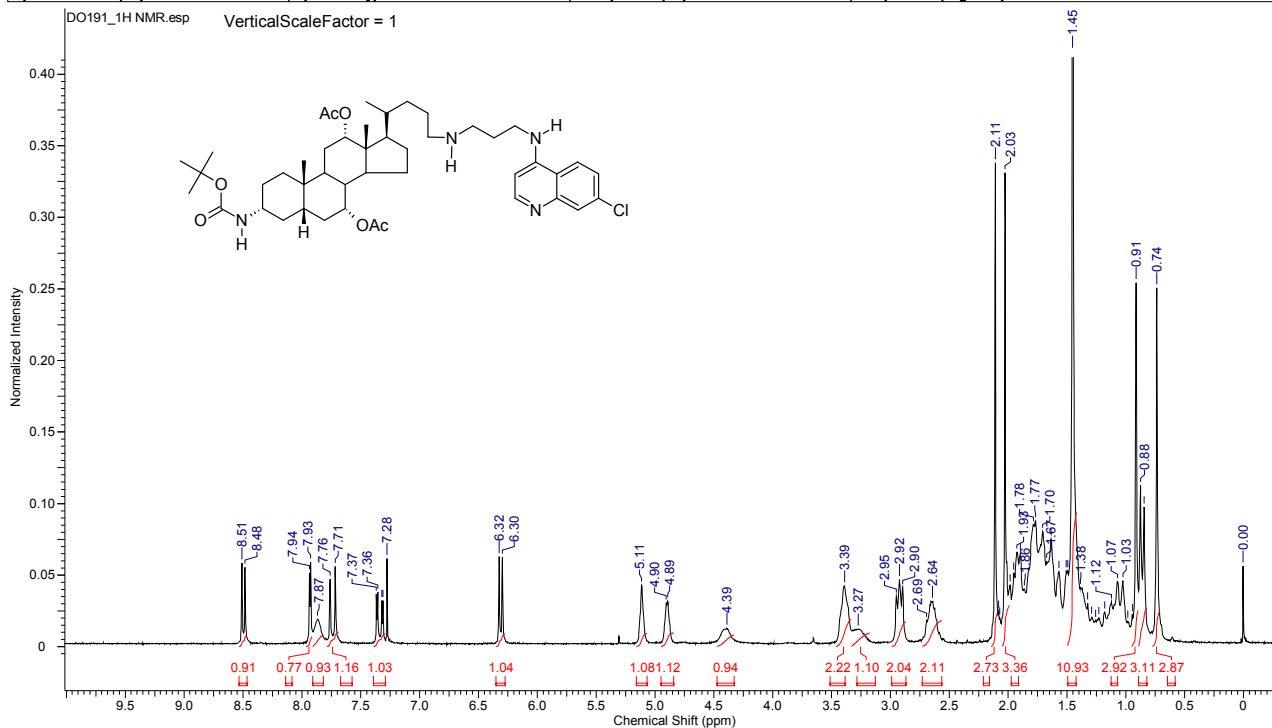

**Compound 41 (DO191):  $^{13}\text{C}$  NMR spectrum (50 MHz):**

2/28/2014 1:48:21 PM

| Number of Nuclei 0 C's |                                                                                                                              |                |                 |                      |           |                        |                     |
|------------------------|------------------------------------------------------------------------------------------------------------------------------|----------------|-----------------|----------------------|-----------|------------------------|---------------------|
| Acquisition Time (sec) | 1.0667                                                                                                                       | Comment        | VF1             | Date                 | Aug 22 09 | Date Stamp             | Aug 22 09           |
| File Name              | C:\Users\Dejan Oспенica\Documents\Radovi\Aminohinoliniski\DO152 i ostali\Recenzija\Spektri NMR_Star200 MHz\DO191\cv1.fid.fid |                |                 |                      |           |                        |                     |
| Frequency (MHz)        | 50.29                                                                                                                        | Nucleus        | $^{13}\text{C}$ | Number of Transients | 24000     | Original Points Count  | 16000               |
| Points Count           | 16384                                                                                                                        | Pulse Sequence | s2pul           | Receiver Gain        | 25.00     | Solvent                | CHLOROFORM-d        |
| Spectrum Offset (Hz)   | 4815.6533                                                                                                                    | Spectrum Type  | STANDARD        | Sweep Width (Hz)     | 15000.00  | Temperature (degree C) | AMBIENT TEMPERATURE |

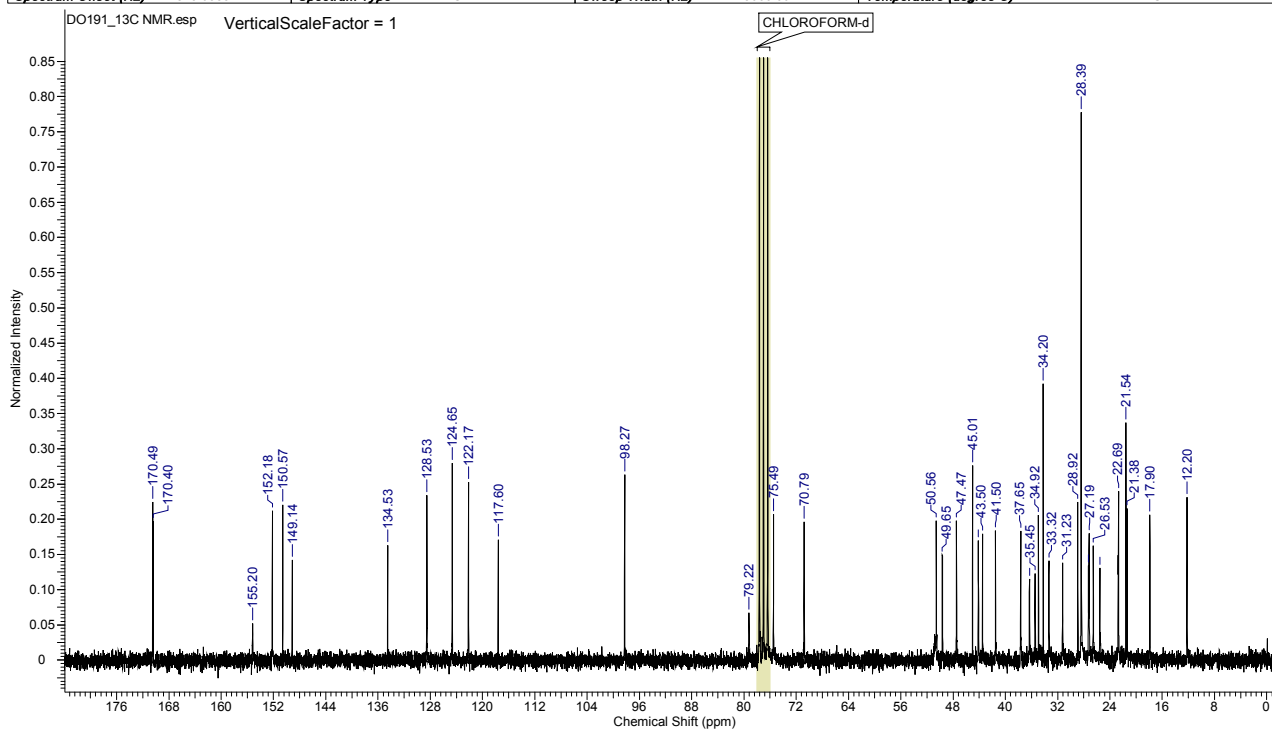

Compound 41 (DO191):  $^1\text{H}$  NMR spectrum (500 MHz):

2/25/2014 1:48:04 PM

| Number of Nuclei 0 H's |                                                                                                                       |                        |                                   |                      |
|------------------------|-----------------------------------------------------------------------------------------------------------------------|------------------------|-----------------------------------|----------------------|
| Acquisition Time (sec) | 2.1823                                                                                                                | Comment                | 5 mm BBO BB-1H/D Z-GRD Z8007/0118 |                      |
| Date Stamp             | 19 Feb 2014 10:50:56                                                                                                  |                        | Date                              | 19 Feb 2014 10:50:56 |
| File Name              | C:\Users\Dejan Ospenica\Documents\Radovi\Aminohinoliniski\DO152 i ostali\Recenzija\Spektri NMR novi\do191\1\data\111r |                        |                                   |                      |
| Frequency (MHz)        | 500.26                                                                                                                | Nucleus                | $^1\text{H}$                      |                      |
| Original Points Count  | 16384                                                                                                                 | Owner                  | nimsu                             |                      |
| Receiver Gain          | 362.00                                                                                                                | SW(cyclical) (Hz)      | 7507.51                           |                      |
| Spectrum Type          | STANDARD                                                                                                              | Sweep Width (Hz)       | 7507.28                           |                      |
|                        |                                                                                                                       | Solvent                | CHLOROFORM-d                      |                      |
|                        |                                                                                                                       | Temperature (degree C) | 27.000                            |                      |
|                        |                                                                                                                       | Number of Transients   | 16                                |                      |
|                        |                                                                                                                       | Points Count           | 32768                             |                      |
|                        |                                                                                                                       | Pulse Sequence         | zg30                              |                      |
|                        |                                                                                                                       | Spectrum Offset (Hz)   | 3489.0959                         |                      |

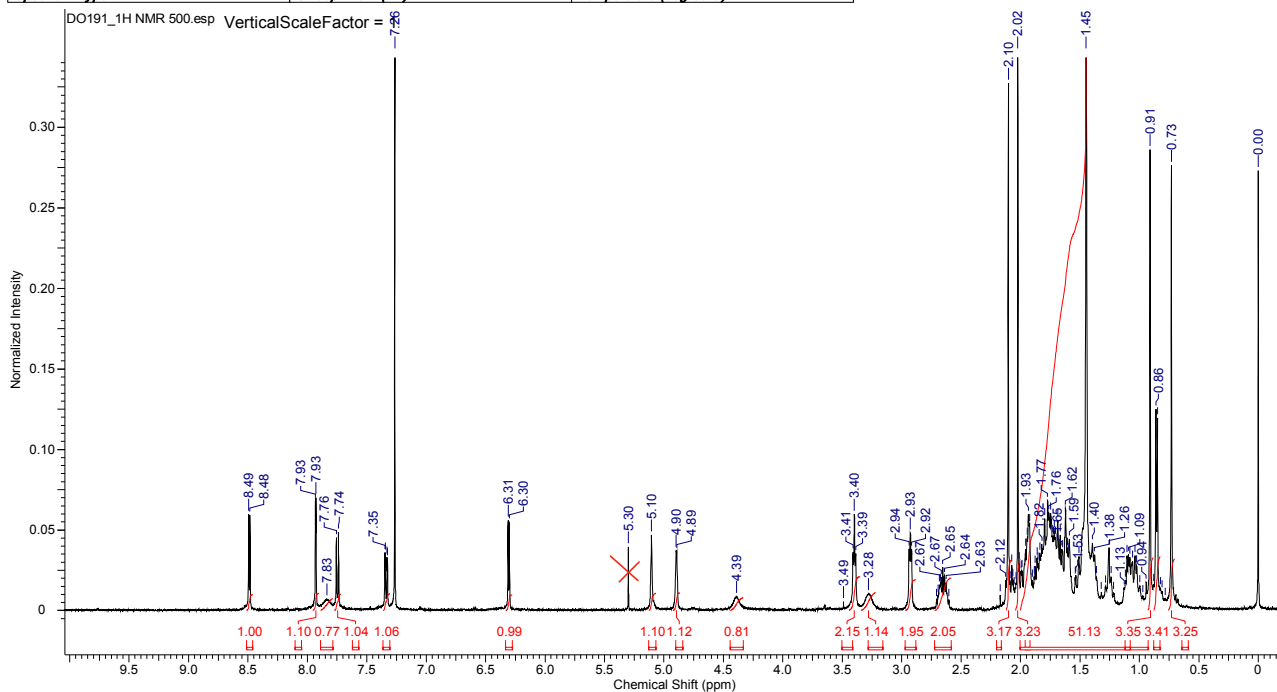Compound 41 (DO191):  $^{13}\text{C}$  NMR spectrum (125 MHz):

2/25/2014 1:49:22 PM

| Number of Nuclei 0 C's |                                                                                                                       |                        |                                   |                      |
|------------------------|-----------------------------------------------------------------------------------------------------------------------|------------------------|-----------------------------------|----------------------|
| Acquisition Time (sec) | 0.5505                                                                                                                | Comment                | 5 mm BBO BB-1H/D Z-GRD Z8007/0118 |                      |
| Date Stamp             | 20 Feb 2014 15:06:56                                                                                                  |                        | Date                              | 20 Feb 2014 15:06:56 |
| File Name              | C:\Users\Dejan Ospenica\Documents\Radovi\Aminohinoliniski\DO152 i ostali\Recenzija\Spektri NMR novi\do191\2\data\111r |                        |                                   |                      |
| Frequency (MHz)        | 125.79                                                                                                                | Nucleus                | $^{13}\text{C}$                   |                      |
| Original Points Count  | 16384                                                                                                                 | Owner                  | nimsu                             |                      |
| Receiver Gain          | 2050.00                                                                                                               | SW(cyclical) (Hz)      | 29761.90                          |                      |
| Spectrum Type          | STANDARD                                                                                                              | Sweep Width (Hz)       | 29761.45                          |                      |
|                        |                                                                                                                       | Solvent                | CHLOROFORM-d                      |                      |
|                        |                                                                                                                       | Temperature (degree C) | 25.200                            |                      |
|                        |                                                                                                                       | Number of Transients   | 1687                              |                      |
|                        |                                                                                                                       | Points Count           | 65536                             |                      |
|                        |                                                                                                                       | Pulse Sequence         | zqpg30                            |                      |
|                        |                                                                                                                       | Spectrum Offset (Hz)   | 13832.2607                        |                      |

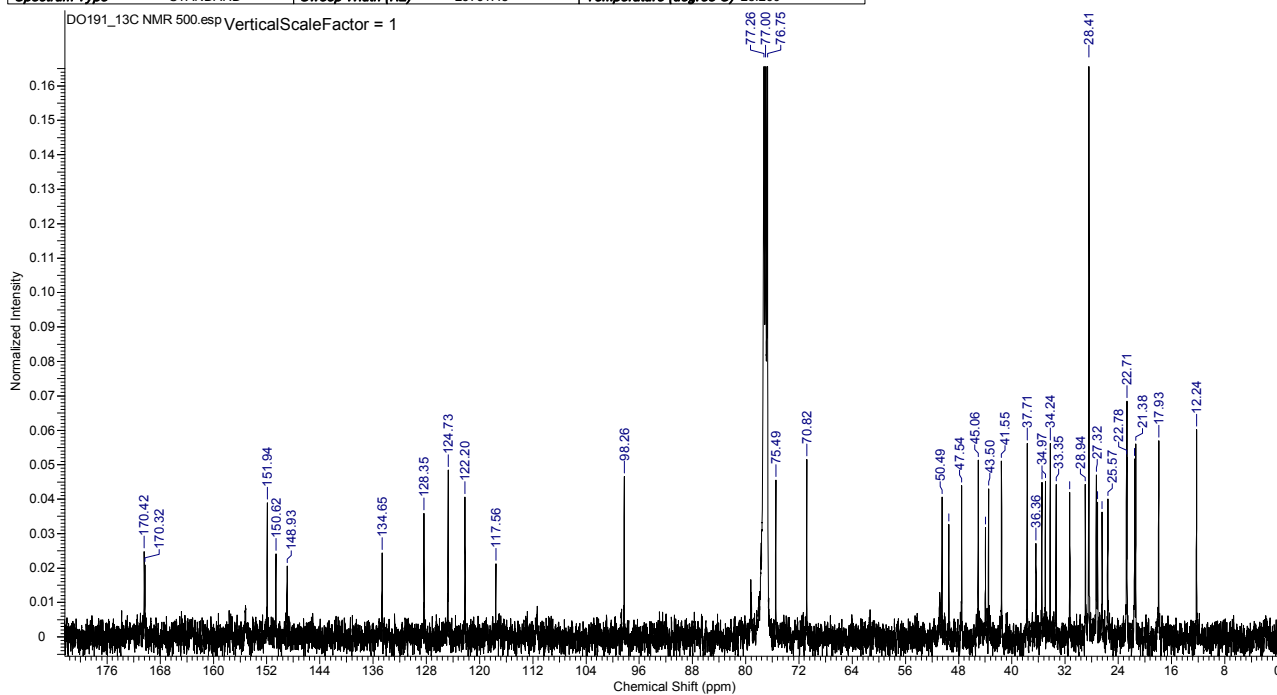

**Compound 42 (DO197):  $^1\text{H}$  NMR spectrum (500 MHz):** HPLC purity: method A: RT 1.868, area 99.31 %; method B: RT 1.859, area 98.31 %.

2/26/2014 5:06:15 PM

| Number of Nuclei 0 H's |                                                                                                                         |                   |                      |                        |                      |
|------------------------|-------------------------------------------------------------------------------------------------------------------------|-------------------|----------------------|------------------------|----------------------|
| Acquisition Time (sec) | 3.1982                                                                                                                  | Date              | 04 Nov 2009 12:26:56 | Date Stamp             | 04 Nov 2009 12:26:56 |
| File Name              | C:\Users\Dejan Oспенica\Documents\Radovi\Aminohinoliniski\DO152 i ostali\Recenzija\Spektri NMR_Ostalo\DO197\1\data\1\1r |                   |                      |                        |                      |
| Frequency (MHz)        | 500.26                                                                                                                  | Nucleus           | $^1\text{H}$         | Number of Transients   | 16                   |
| Original Points Count  | 16384                                                                                                                   | Owner             | nmrsu                | Points Count           | 32768                |
| Receiver Gain          | 101.00                                                                                                                  | SW(cyclical) (Hz) | 5122.95              | Solvent                | CHLOROFORM-d         |
| Spectrum Offset (Hz)   | 2190.0869                                                                                                               | Spectrum Type     | STANDARD             | Sweep Width (Hz)       | 5122.79              |
|                        |                                                                                                                         |                   |                      | Temperature (degree C) | 24.900               |

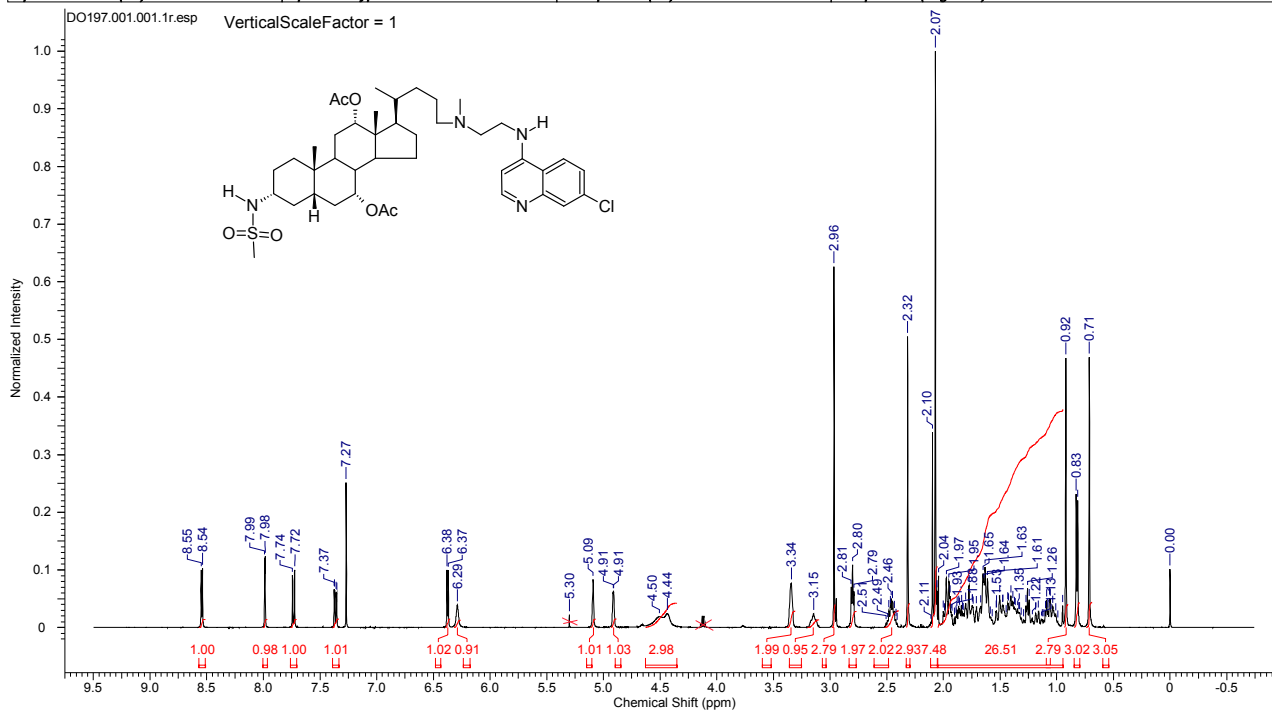

**Compound 42 (DO197):  $^{13}\text{C}$  NMR spectrum (125 MHz):**

2/26/2014 5:08:26 PM

| Number of Nuclei 0 C's |                                                                                                                         |                   |                      |                        |                      |
|------------------------|-------------------------------------------------------------------------------------------------------------------------|-------------------|----------------------|------------------------|----------------------|
| Acquisition Time (sec) | 0.5505                                                                                                                  | Date              | 04 Nov 2009 12:35:28 | Date Stamp             | 04 Nov 2009 12:35:28 |
| File Name              | C:\Users\Dejan Oспенica\Documents\Radovi\Aminohinoliniski\DO152 i ostali\Recenzija\Spektri NMR_Ostalo\DO197\2\data\1\1r |                   |                      |                        |                      |
| Frequency (MHz)        | 125.79                                                                                                                  | Nucleus           | $^{13}\text{C}$      | Number of Transients   | 1027                 |
| Original Points Count  | 16384                                                                                                                   | Owner             | nmrsu                | Points Count           | 32768                |
| Receiver Gain          | 1440.00                                                                                                                 | SW(cyclical) (Hz) | 29761.90             | Solvent                | CHLOROFORM-d         |
| Spectrum Type          | STANDARD                                                                                                                | Sweep Width (Hz)  | 29761.00             | Temperature (degree C) | 25.000               |
|                        |                                                                                                                         |                   |                      | Spectrum Offset (Hz)   | 13831.9326           |

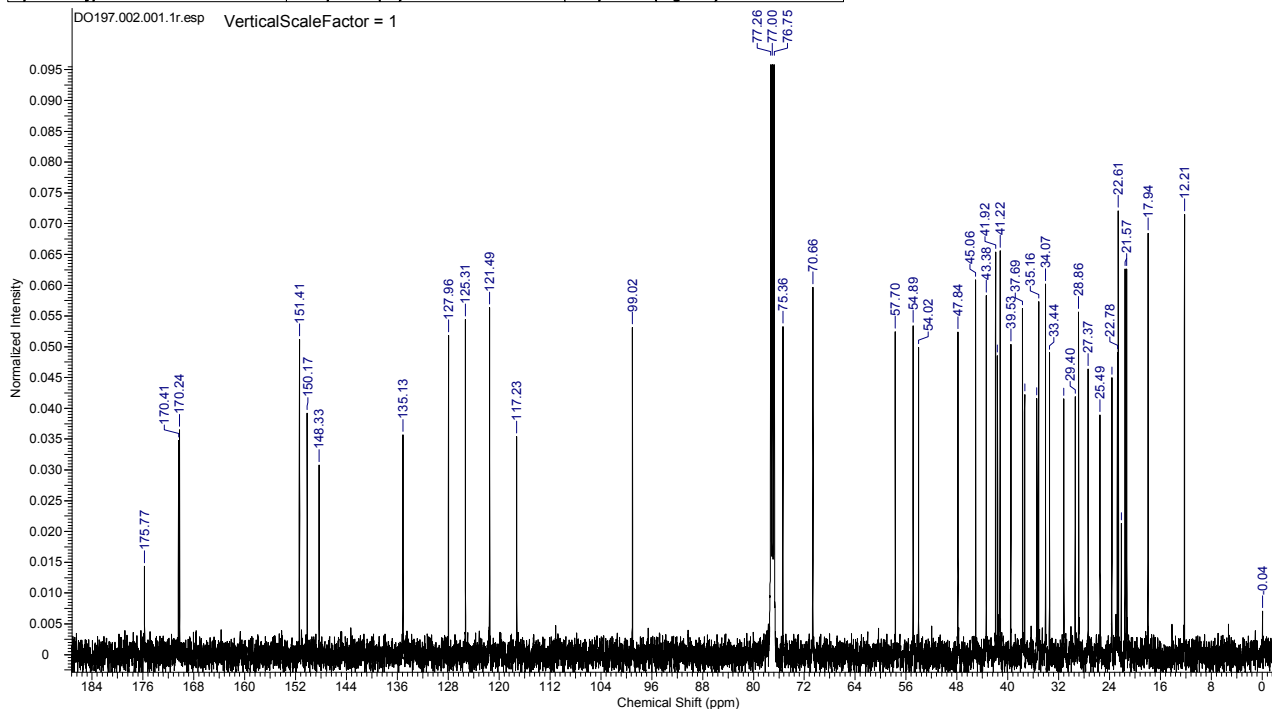

**Compound 43 (DO199):  $^1\text{H}$  NMR spectrum (500 MHz):** HPLC purity: method A: RT 1.879, area 99.37 %; method B: RT 1.866, area 99.37 %.

2/28/2014 3:21:13 PM

| Number of Nuclei 0 H's |                                                                                                                        |                   |                      |                        |                      |
|------------------------|------------------------------------------------------------------------------------------------------------------------|-------------------|----------------------|------------------------|----------------------|
| Acquisition Time (sec) | 3.2855                                                                                                                 | Date              | 11 Jan 2010 11:16:32 | Date Stamp             | 11 Jan 2010 11:16:32 |
| File Name              | C:\Users\Dejan Oспенica\Documents\Radovi\Aminohinoliniski\DO152 i ostali\Recenzija\Spektri NMR_Ostalo\DO199\1\data\11r |                   |                      |                        |                      |
| Frequency (MHz)        | 500.26                                                                                                                 | Nucleus           | $^1\text{H}$         | Number of Transients   | 16                   |
| Original Points Count  | 16384                                                                                                                  | Owner             | nmrsu                | Points Count           | 16384                |
| Receiver Gain          | 144.00                                                                                                                 | SW(cyclical) (Hz) | 4986.70              | Solvent                | CHLOROFORM-d         |
| Spectrum Offset (Hz)   | 2131.6174                                                                                                              | Spectrum Type     | STANDARD             | Sweep Width (Hz)       | 4986.40              |
|                        |                                                                                                                        |                   |                      | Temperature (degree C) | 25.000               |

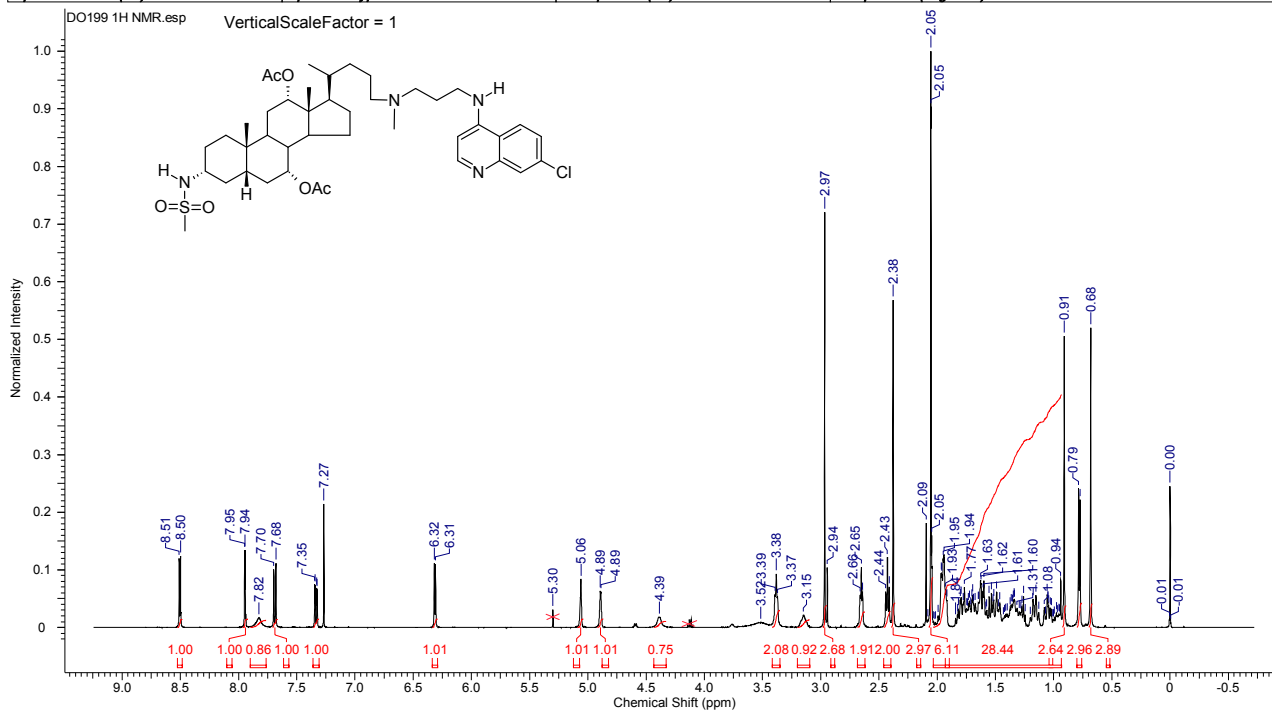

**Compound 43 (DO199):  $^{13}\text{C}$  NMR spectrum (125 MHz):**

2/26/2014 5:21:25 PM

| Number of Nuclei 0 C's |                                                                                                                        |                   |                      |                        |                      |
|------------------------|------------------------------------------------------------------------------------------------------------------------|-------------------|----------------------|------------------------|----------------------|
| Acquisition Time (sec) | 0.5505                                                                                                                 | Date              | 11 Jan 2010 11:27:12 | Date Stamp             | 11 Jan 2010 11:27:12 |
| File Name              | C:\Users\Dejan Oспенica\Documents\Radovi\Aminohinoliniski\DO152 i ostali\Recenzija\Spektri NMR_Ostalo\DO199\2\data\11r |                   |                      |                        |                      |
| Frequency (MHz)        | 125.79                                                                                                                 | Nucleus           | $^{13}\text{C}$      | Number of Transients   | 1216                 |
| Original Points Count  | 16384                                                                                                                  | Owner             | nmrsu                | Points Count           | 32768                |
| Receiver Gain          | 912.00                                                                                                                 | SW(cyclical) (Hz) | 29761.90             | Solvent                | CHLOROFORM-d         |
| Spectrum Type          | STANDARD                                                                                                               | Sweep Width (Hz)  | 29761.00             | Temperature (degree C) | 25.000               |
|                        |                                                                                                                        |                   |                      | Spectrum Offset (Hz)   | 13832.2471           |

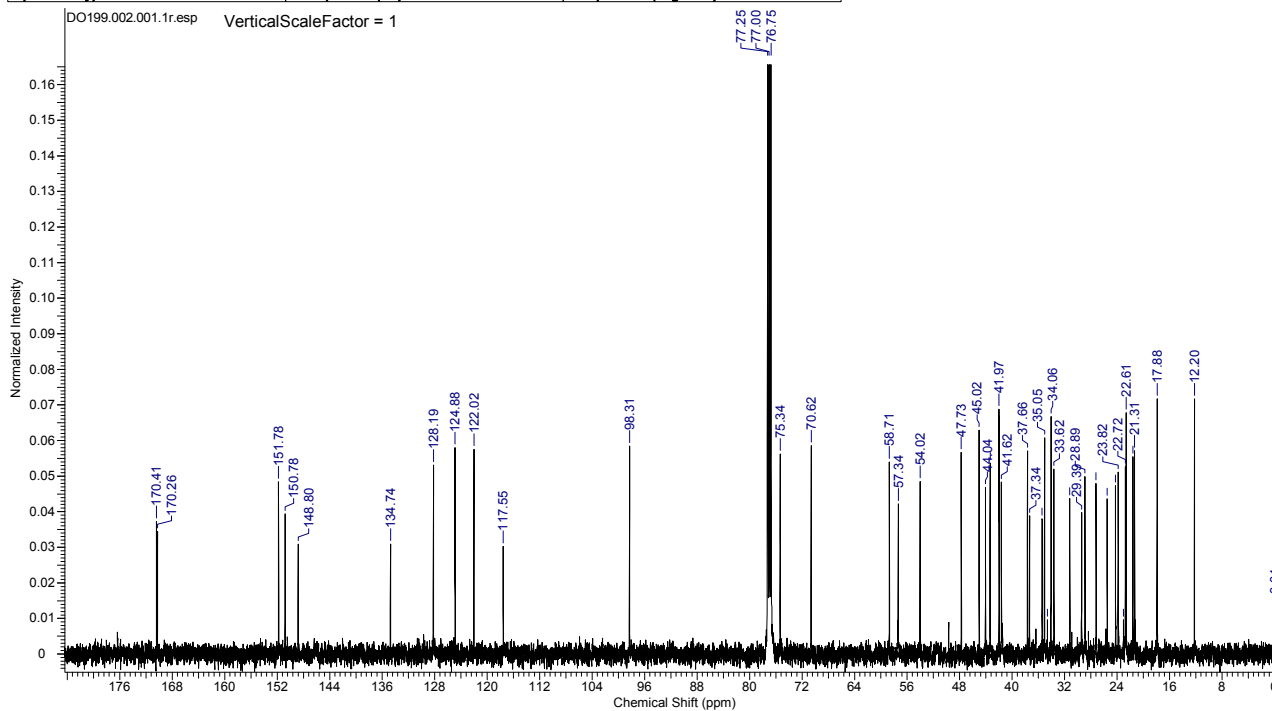

**Compound 44 (ST11):  $^1\text{H}$  NMR spectrum (500 MHz):** HPLC purity: method A: RT 1.994, area 99.12 %; method C: RT 9.936, area 98.20 %.

2/25/2014 2:07:18 PM

| Number of Nuclei 0 H's |                                                                                                                                      |                        |                      |                      |
|------------------------|--------------------------------------------------------------------------------------------------------------------------------------|------------------------|----------------------|----------------------|
| Acquisition Time (sec) | 2.5166                                                                                                                               | Date                   | 19 Mar 2012 09:46:56 |                      |
| File Name              | C:\Users\Dejan Ovsenica\Documents\Radovi\Aminohinoliniski\DO152 i ostali\Recenzijal\Spektri NMR_ Stari\500 MHz\KAA074-3\1\pdata\111r |                        | Date Stamp           | 19 Mar 2012 09:46:56 |
| Frequency (MHz)        | 500.26                                                                                                                               | Nucleus                | $^1\text{H}$         |                      |
| Original Points Count  | 16384                                                                                                                                | Owner                  | nmsru                |                      |
| Receiver Gain          | 57.00                                                                                                                                | SW(cyclical) (Hz)      | 6510.42              |                      |
| Spectrum Type          | STANDARD                                                                                                                             | Sweep Width (Hz)       | 6510.22              |                      |
|                        |                                                                                                                                      | Temperature (degree C) | 25.000               |                      |
|                        |                                                                                                                                      | Points Count           | 32768                |                      |
|                        |                                                                                                                                      | Solvent                | CHLOROFORM-d         |                      |
|                        |                                                                                                                                      | Pulse Sequence         | zg30                 |                      |
|                        |                                                                                                                                      | Spectrum Offset (Hz)   | 2753.9351            |                      |

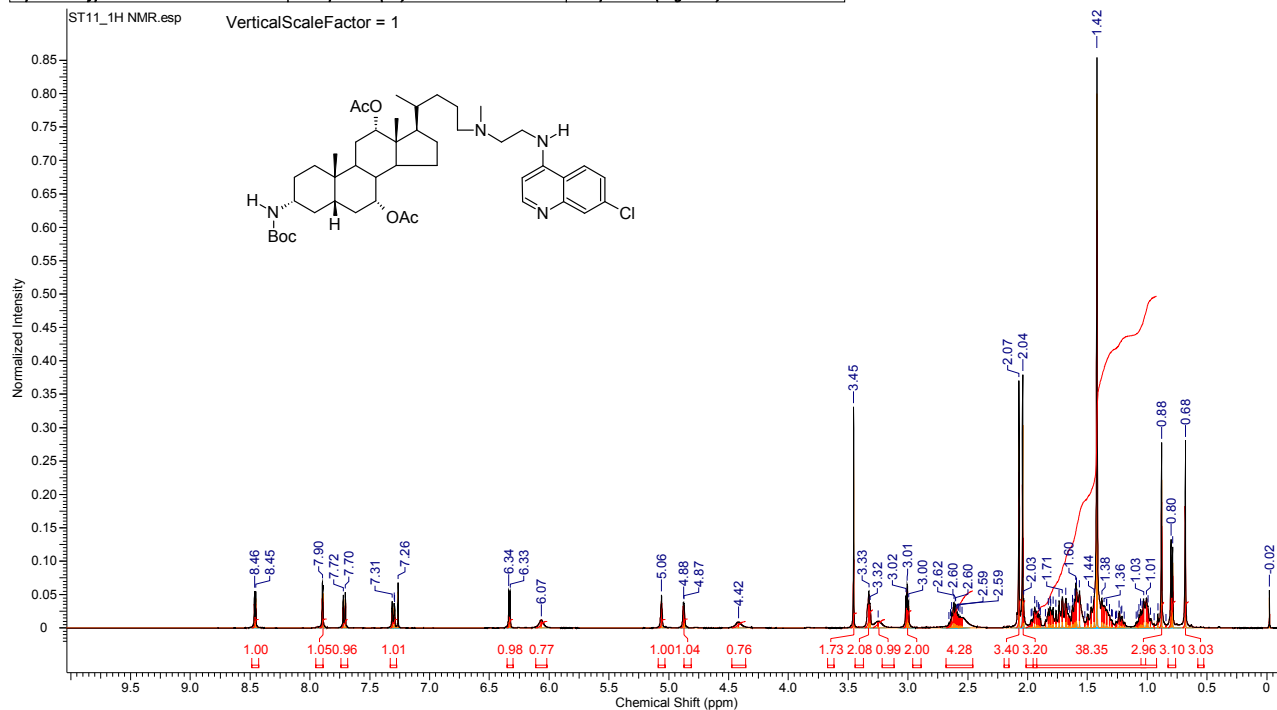

**Compound 44 (ST11):  $^{13}\text{C}$  NMR spectrum (125 MHz):**

2/25/2014 2:08:41 PM

| Number of Nuclei 0 C's |                                                                                                                                      |                        |                      |                      |
|------------------------|--------------------------------------------------------------------------------------------------------------------------------------|------------------------|----------------------|----------------------|
| Acquisition Time (sec) | 0.5505                                                                                                                               | Date                   | 19 Mar 2012 09:51:12 |                      |
| File Name              | C:\Users\Dejan Ovsenica\Documents\Radovi\Aminohinoliniski\DO152 i ostali\Recenzijal\Spektri NMR_ Stari\500 MHz\KAA074-3\2\pdata\111r |                        | Date Stamp           | 19 Mar 2012 09:51:12 |
| Frequency (MHz)        | 125.79                                                                                                                               | Nucleus                | $^{13}\text{C}$      |                      |
| Original Points Count  | 16384                                                                                                                                | Owner                  | nmsru                |                      |
| Receiver Gain          | 1030.00                                                                                                                              | SW(cyclical) (Hz)      | 29761.90             |                      |
| Spectrum Type          | STANDARD                                                                                                                             | Sweep Width (Hz)       | 29761.00             |                      |
|                        |                                                                                                                                      | Temperature (degree C) | 25.100               |                      |
|                        |                                                                                                                                      | Points Count           | 32768                |                      |
|                        |                                                                                                                                      | Solvent                | CHLOROFORM-d         |                      |
|                        |                                                                                                                                      | Pulse Sequence         | zgpg30               |                      |
|                        |                                                                                                                                      | Spectrum Offset (Hz)   | 13827.5557           |                      |

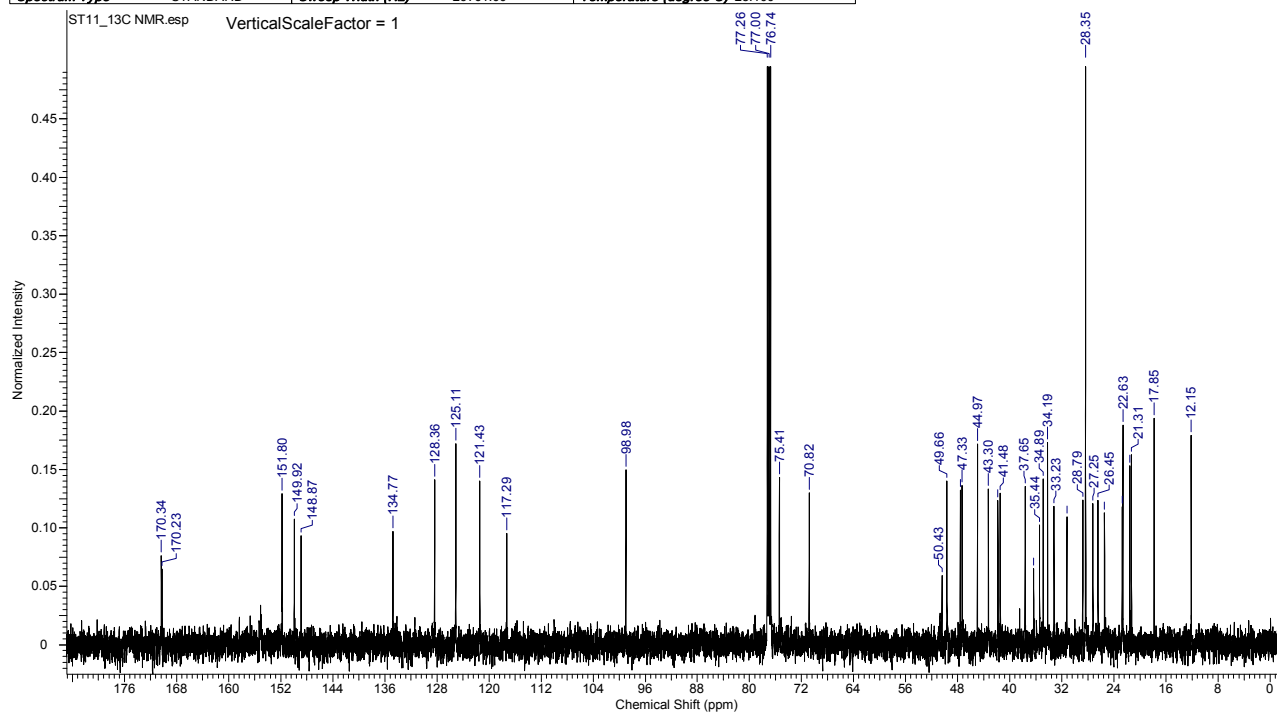



**Compound 45 (MV22):**  $^1\text{H}$  NMR spectrum (500 MHz): HPLC purity: method C: RT 7.896, area 96.46; method D: RT 5.553, area 96.83 %.

2/26/2014 7:22:00 PM

| Number of Nuclei 0 H's |                                                                                                                                |                   |                      |                        |              |                      |           |
|------------------------|--------------------------------------------------------------------------------------------------------------------------------|-------------------|----------------------|------------------------|--------------|----------------------|-----------|
| Acquisition Time (sec) | 3.1894                                                                                                                         | Date              | 10 Dec 2009 16:28:00 |                        |              |                      |           |
| File Name              | C:\Users\Dejan Ovsenica\Documents\Radovi\Aminohinoliniski\DO152 i ostali\Recenzija\Spektri NMR_Ostalo\MV22\MVAA028d\1\data\11r |                   | Date Stamp           | 10 Dec 2009 16:28:00   |              |                      |           |
| Frequency (MHz)        | 500.26                                                                                                                         | Nucleus           | $^1\text{H}$         | Number of Transients   | 16           | Origin               | spect     |
| Original Points Count  | 16384                                                                                                                          | Owner             | nmrsu                | Points Count           | 32768        | Pulse Sequence       | zq30      |
| Receiver Gain          | 144.00                                                                                                                         | SW(cyclical) (Hz) | 5136.99              | Solvent                | CHLOROFORM-d | Spectrum Offset (Hz) | 2186.4534 |
| Spectrum Type          | STANDARD                                                                                                                       | Sweep Width (Hz)  | 5136.83              | Temperature (degree C) | 25.000       |                      |           |

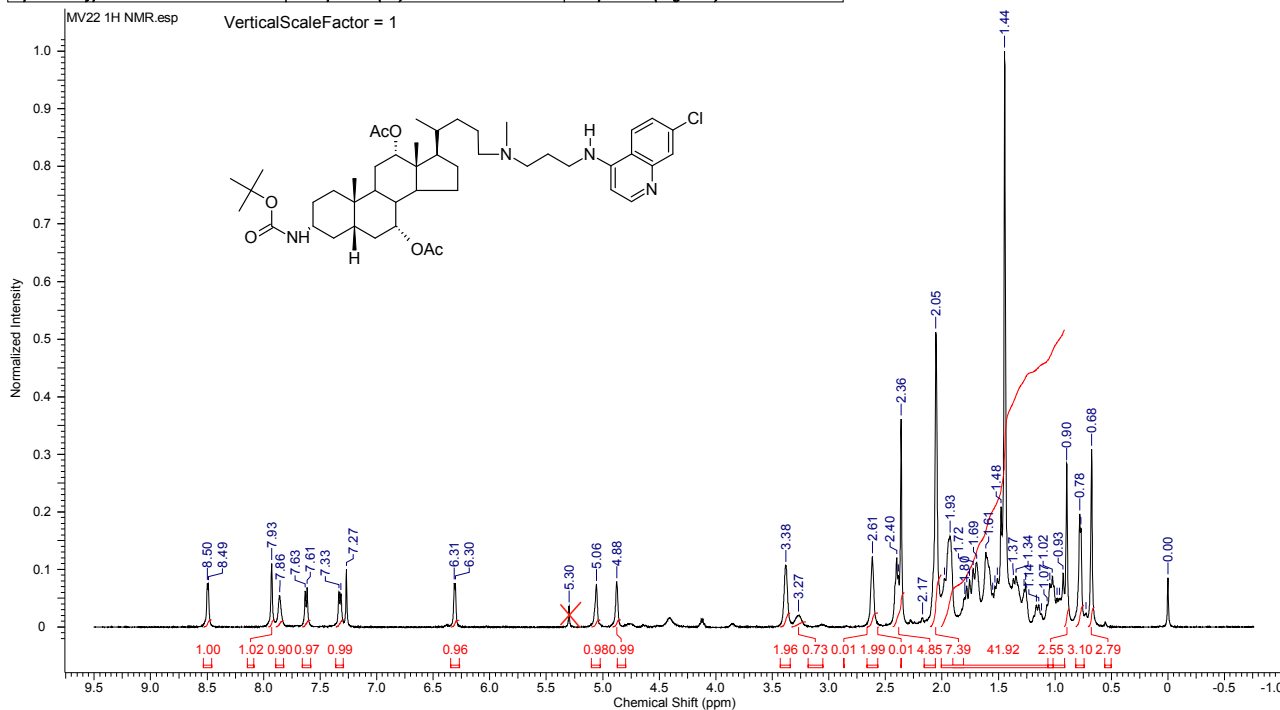

**Compound 45 (MV22):**  $^{13}\text{C}$  NMR spectrum (125 MHz):

2/26/2014 5:26:36 PM

| Number of Nuclei 0 C's |                                                                                                                                |                   |                      |                        |              |                      |            |
|------------------------|--------------------------------------------------------------------------------------------------------------------------------|-------------------|----------------------|------------------------|--------------|----------------------|------------|
| Acquisition Time (sec) | 0.5505                                                                                                                         | Date              | 10 Dec 2009 16:34:24 |                        |              |                      |            |
| File Name              | C:\Users\Dejan Ovsenica\Documents\Radovi\Aminohinoliniski\DO152 i ostali\Recenzija\Spektri NMR_Ostalo\MV22\MVAA028d\2\data\11r |                   | Date Stamp           | 10 Dec 2009 16:34:24   |              |                      |            |
| Frequency (MHz)        | 125.79                                                                                                                         | Nucleus           | $^{13}\text{C}$      | Number of Transients   | 835          | Origin               | spect      |
| Original Points Count  | 16384                                                                                                                          | Owner             | nmrsu                | Points Count           | 32768        | Pulse Sequence       | zpgg30     |
| Receiver Gain          | 812.00                                                                                                                         | SW(cyclical) (Hz) | 29761.90             | Solvent                | CHLOROFORM-d | Spectrum Offset (Hz) | 13832.5371 |
| Spectrum Type          | STANDARD                                                                                                                       | Sweep Width (Hz)  | 29761.00             | Temperature (degree C) | 25.000       |                      |            |

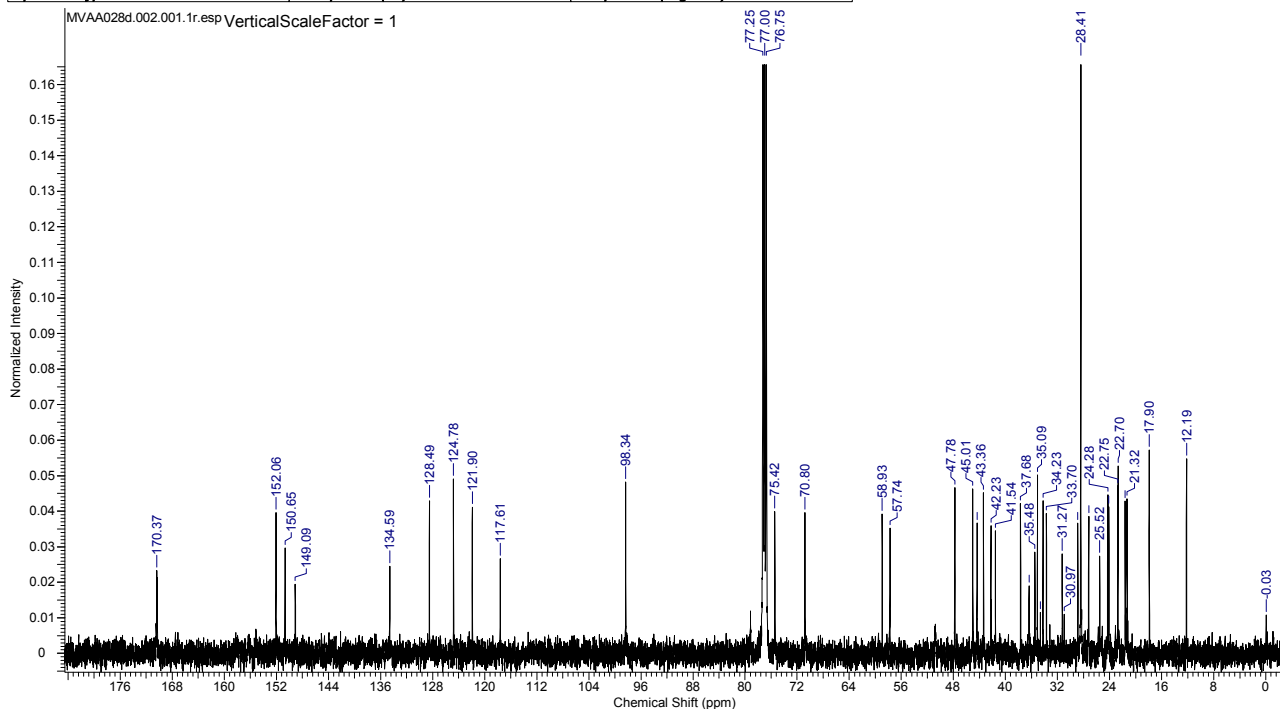

**Compound 50 (MV78):**  $^1\text{H}$  NMR spectrum (200 MHz). HPLC purity: method A: RT 1.925, area 98.15 %; method B: RT 7.942, area 96.45 %.

2/26/2014 7:26:32 PM

| Number of Nuclei 0 H's |                                                                                                                          |                |              |                        |                     |
|------------------------|--------------------------------------------------------------------------------------------------------------------------|----------------|--------------|------------------------|---------------------|
| Acquisition Time (sec) | 1.3878                                                                                                                   | Comment        | MV78         | Date                   | Feb 11 11           |
| File Name              | C:\Users\Dejan Ovsenica\Documents\Radovi\Aminohinoliniski\DO152 i ostali\Recenzija\Spektri NMR_Ostalo\MV78\hmv78.fid.fid |                |              |                        |                     |
| Frequency (MHz)        | 199.97                                                                                                                   | Nucleus        | $^1\text{H}$ | Number of Transients   | 32                  |
| Points Count           | 8192                                                                                                                     | Pulse Sequence | s2pul        | Receiver Gain          | 4.00                |
| Spectrum Offset (Hz)   | 1689.5496                                                                                                                | Spectrum Type  | STANDARD     | Sweep Width (Hz)       | 4600.00             |
|                        |                                                                                                                          |                |              | Solvent                | CHLOROFORM-d        |
|                        |                                                                                                                          |                |              | Temperature (degree C) | AMBIENT TEMPERATURE |

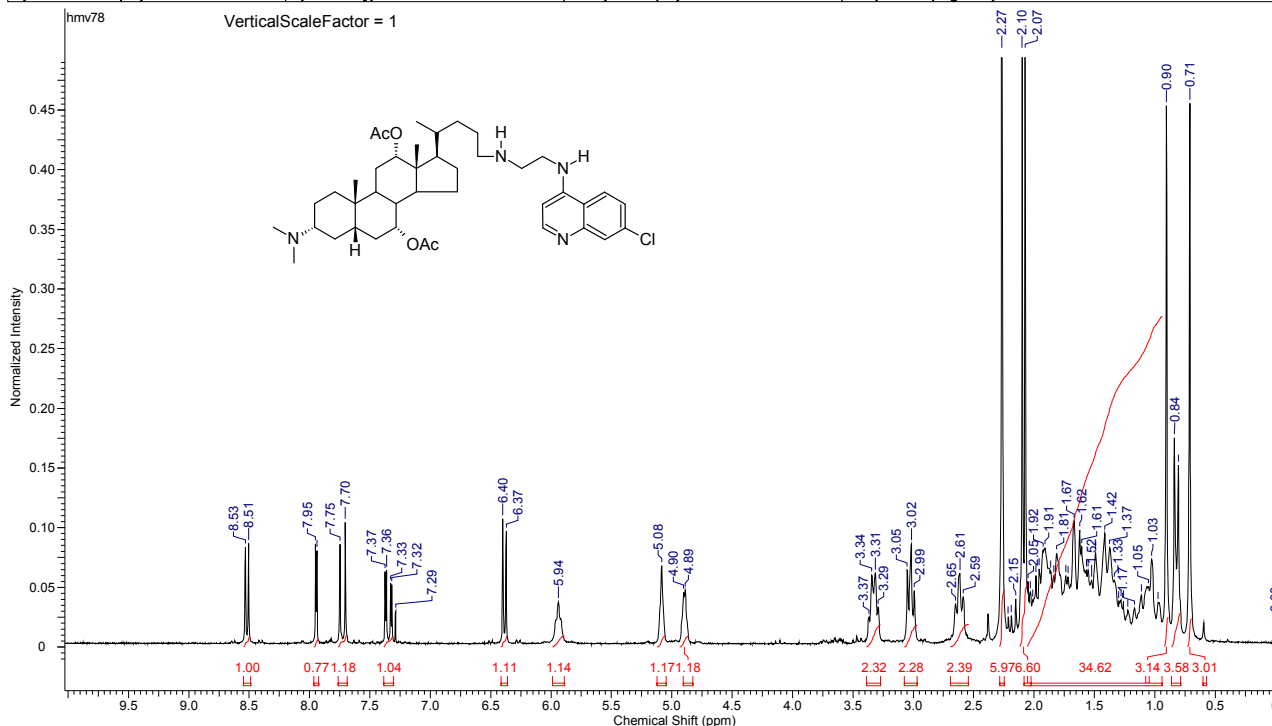

**Compound 50 (MV78):**  $^{13}\text{C}$  NMR spectrum (50 MHz).

2/28/2014 4:13:47 PM

| Number of Nuclei 0 C's |                                                                                                                          |                |                 |                        |                     |
|------------------------|--------------------------------------------------------------------------------------------------------------------------|----------------|-----------------|------------------------|---------------------|
| Acquisition Time (sec) | 1.0667                                                                                                                   | Comment        | MV78            | Date                   | Feb 11 11           |
| File Name              | C:\Users\Dejan Ovsenica\Documents\Radovi\Aminohinoliniski\DO152 i ostali\Recenzija\Spektri NMR_Ostalo\MV78\cmv78.fid.fid |                |                 |                        |                     |
| Frequency (MHz)        | 50.29                                                                                                                    | Nucleus        | $^{13}\text{C}$ | Number of Transients   | 1307                |
| Points Count           | 16384                                                                                                                    | Pulse Sequence | s2pul           | Receiver Gain          | 25.00               |
| Spectrum Offset (Hz)   | 4813.8223                                                                                                                | Spectrum Type  | STANDARD        | Sweep Width (Hz)       | 15000.00            |
|                        |                                                                                                                          |                |                 | Solvent                | CHLOROFORM-d        |
|                        |                                                                                                                          |                |                 | Temperature (degree C) | AMBIENT TEMPERATURE |

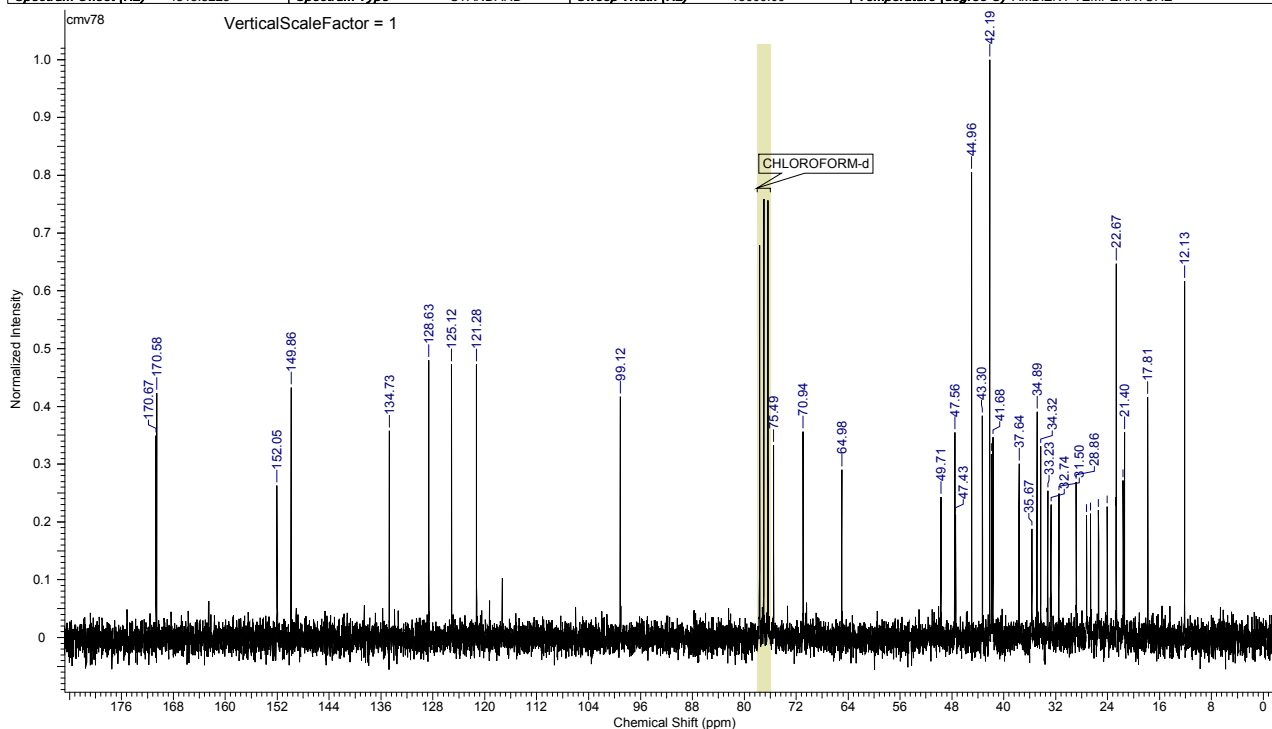

**Compound 51 (MV61):**  $^1\text{H}$  NMR spectrum (500 MHz). HPLC purity: method A: RT 1.804, area 97.63 %; method B: RT 1.922, area 98.03 %; method C: RT 12.462, area 95.41 %.

2/26/2014 7:28:52 PM

| Number of Nuclei 0 H's |                                                                                                                              |                   |                      |                        |              |                      |           |
|------------------------|------------------------------------------------------------------------------------------------------------------------------|-------------------|----------------------|------------------------|--------------|----------------------|-----------|
| Acquisition Time (sec) | 3.4537                                                                                                                       | Date              | 15 Mar 2010 12:31:12 |                        |              |                      |           |
| File Name              | C:\Users\Dejan Ovsenica\Documents\Radovi\Aminohinoliniski\DO152 i ostali\Recenzija\Spektri NMR_Star\500 MHz\MV6111\pdata\11r |                   | Date Stamp           | 15 Mar 2010 12:31:12   |              |                      |           |
| Frequency (MHz)        | 500.26                                                                                                                       | Nucleus           | $^1\text{H}$         | Number of Transients   | 16           | Origin               | spect     |
| Original Points Count  | 16384                                                                                                                        | Owner             | nmrsu                | Points Count           | 32768        | Pulse Sequence       | zg30      |
| Receiver Gain          | 228.00                                                                                                                       | SW(cyclical) (Hz) | 4743.83              | Solvent                | CHLOROFORM-d | Spectrum Offset (Hz) | 2125.5134 |
| Spectrum Type          | STANDARD                                                                                                                     | Sweep Width (Hz)  | 4743.69              | Temperature (degree C) | 25.000       |                      |           |

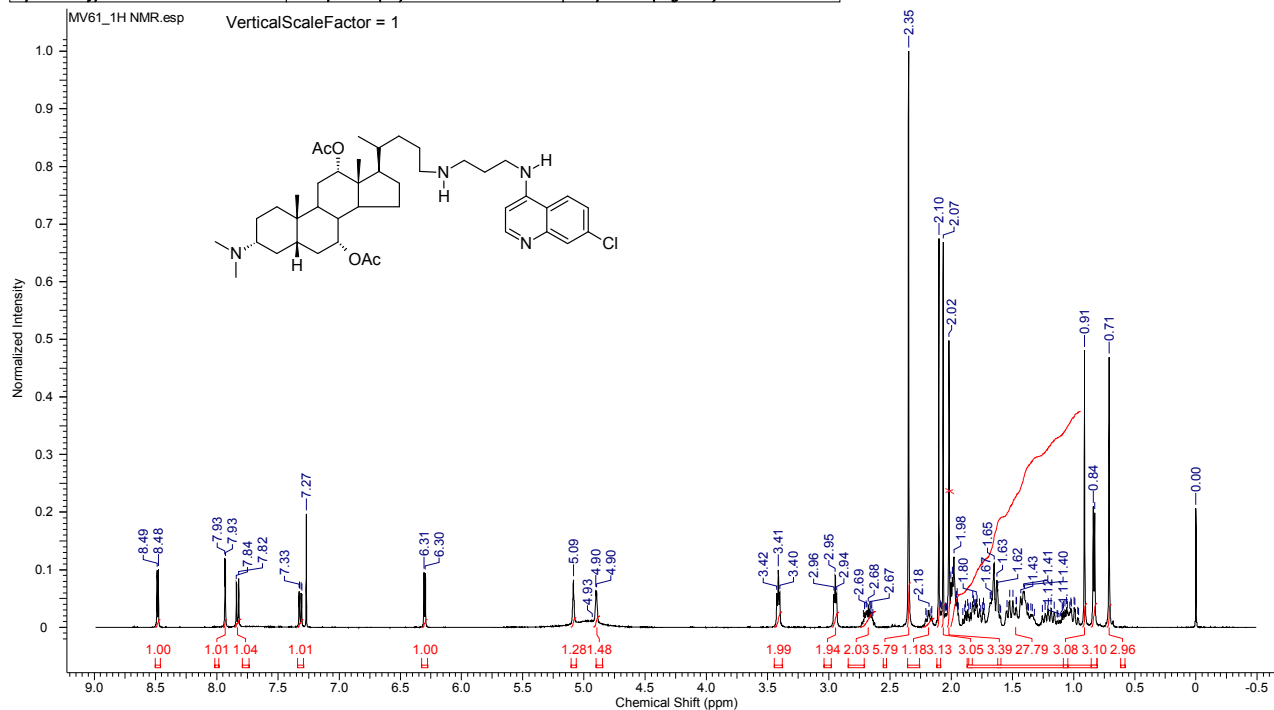

**Compound 51 (MV61):**  $^{13}\text{C}$  NMR spectrum (125 MHz).

2/25/2014 2:28:55 PM

| Number of Nuclei 0 C's |                                                                                                                             |                   |                      |                        |              |                      |            |
|------------------------|-----------------------------------------------------------------------------------------------------------------------------|-------------------|----------------------|------------------------|--------------|----------------------|------------|
| Acquisition Time (sec) | 0.5505                                                                                                                      | Date              | 15 Mar 2010 12:37:36 |                        |              |                      |            |
| File Name              | C:\Users\Dejan Ovsenica\Documents\Radovi\Aminohinoliniski\DO152 i ostali\Recenzija\Spektri NMR_Star\500 MHz\MV612\pdata\11r |                   | Date Stamp           | 15 Mar 2010 12:37:36   |              |                      |            |
| Frequency (MHz)        | 125.79                                                                                                                      | Nucleus           | $^{13}\text{C}$      | Number of Transients   | 825          | Origin               | spect      |
| Original Points Count  | 16384                                                                                                                       | Owner             | nmrsu                | Points Count           | 32768        | Pulse Sequence       | zgpg30     |
| Receiver Gain          | 912.00                                                                                                                      | SW(cyclical) (Hz) | 29761.90             | Solvent                | CHLOROFORM-d | Spectrum Offset (Hz) | 13832.5234 |
| Spectrum Type          | STANDARD                                                                                                                    | Sweep Width (Hz)  | 29761.00             | Temperature (degree C) | 25.000       |                      |            |

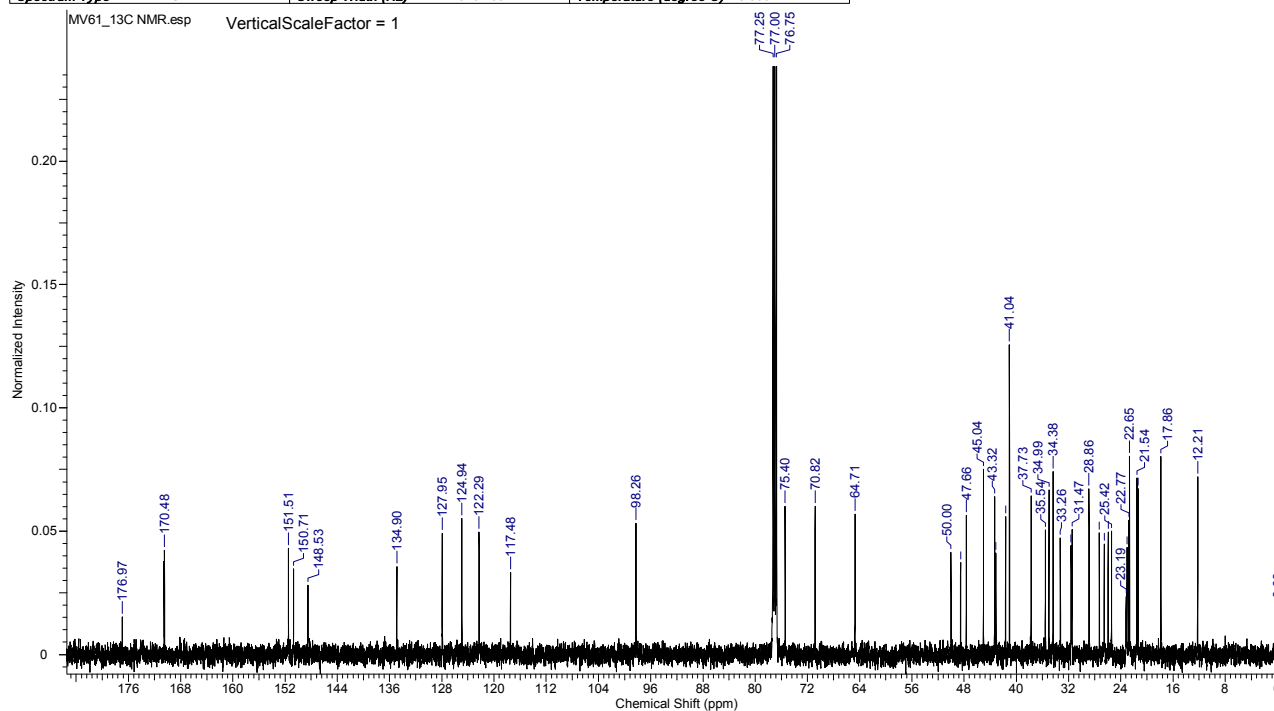

**Compound 52 (DO181):  $^1\text{H}$  NMR spectrum (500 MHz).** HPLC purity: method A: RT 2.004, area 98.23 %; method B: RT 7.973, area 95.08 %;

2/26/2014 5:47:00 PM

| Number of Nuclei 0 H's |                                                                                                                                  |                   |                      |                        |              |                      |           |
|------------------------|----------------------------------------------------------------------------------------------------------------------------------|-------------------|----------------------|------------------------|--------------|----------------------|-----------|
| Acquisition Time (sec) | 2.9819                                                                                                                           | Date              | 20 Mar 2008 11:01:36 |                        |              |                      |           |
| File Name              | C:\Users\Dejan Ovsenica\Documents\Radovi\Aminohinoliniski\DO152 i ostali\Recenzija\Spektri NMR_Ostalo\DO181\DOAA0411\1\data\111r |                   | Date Stamp           | 20 Mar 2008 11:01:36   |              |                      |           |
| Frequency (MHz)        | 500.26                                                                                                                           | Nucleus           | $^1\text{H}$         | Number of Transients   | 16           | Origin               | spect     |
| Original Points Count  | 16384                                                                                                                            | Owner             | nmsru                | Points Count           | 16384        | Pulse Sequence       | zg30      |
| Receiver Gain          | 114.00                                                                                                                           | SW(cyclical) (Hz) | 5494.51              | Solvent                | CHLOROFORM-d | Spectrum Offset (Hz) | 2315.4834 |
| Spectrum Type          | STANDARD                                                                                                                         | Sweep Width (Hz)  | 5494.17              | Temperature (degree C) | 25.000       |                      |           |

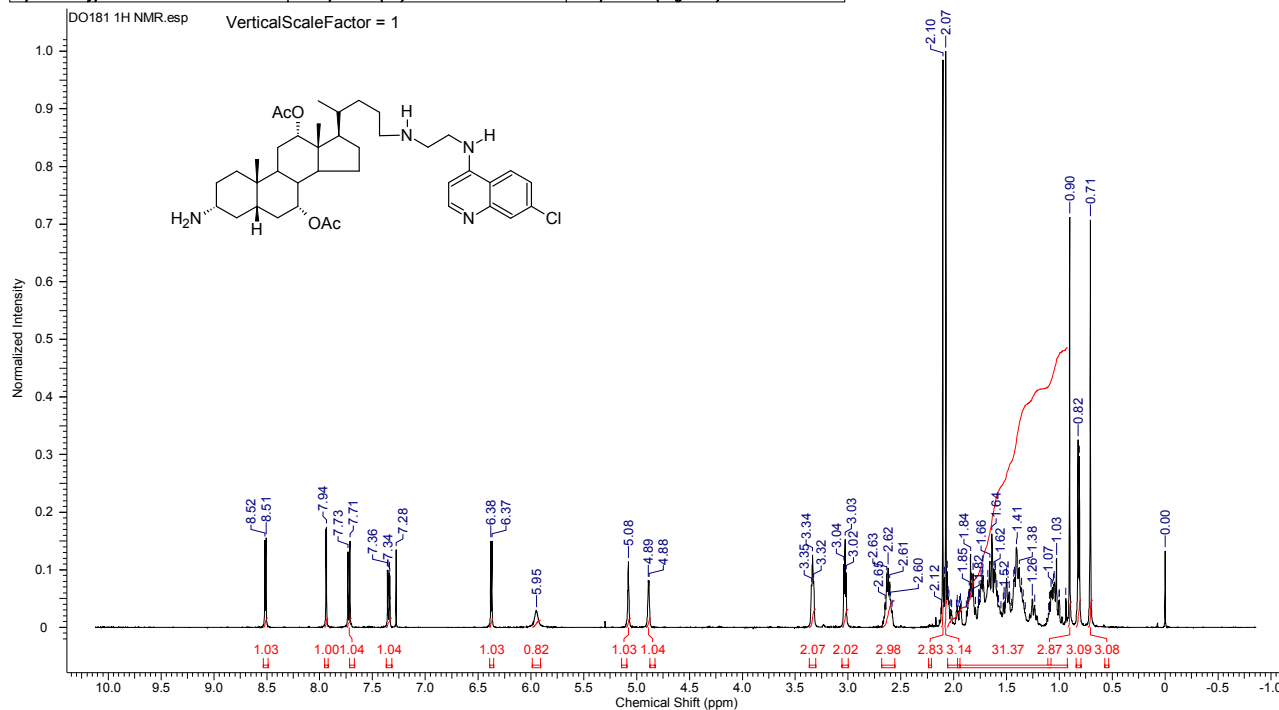

**Compound 52 (DO181):  $^{13}\text{C}$  NMR spectrum (125 MHz).**

2/26/2014 5:48:41 PM

| Number of Nuclei 0 C's |                                                                                                                                  |                   |                      |                        |              |                      |            |
|------------------------|----------------------------------------------------------------------------------------------------------------------------------|-------------------|----------------------|------------------------|--------------|----------------------|------------|
| Acquisition Time (sec) | 1.1010                                                                                                                           | Date              | 20 Mar 2008 11:08:00 |                        |              |                      |            |
| File Name              | C:\Users\Dejan Ovsenica\Documents\Radovi\Aminohinoliniski\DO152 i ostali\Recenzija\Spektri NMR_Ostalo\DO181\DOAA0412\1\data\111r |                   | Date Stamp           | 20 Mar 2008 11:08:00   |              |                      |            |
| Frequency (MHz)        | 125.79                                                                                                                           | Nucleus           | $^{13}\text{C}$      | Number of Transients   | 349          | Origin               | spect      |
| Original Points Count  | 32768                                                                                                                            | Owner             | nmsru                | Points Count           | 32768        | Pulse Sequence       | zgpg30     |
| Receiver Gain          | 1030.00                                                                                                                          | SW(cyclical) (Hz) | 29761.90             | Solvent                | CHLOROFORM-d | Spectrum Offset (Hz) | 13831.9209 |
| Spectrum Type          | STANDARD                                                                                                                         | Sweep Width (Hz)  | 29761.00             | Temperature (degree C) | 25.000       |                      |            |

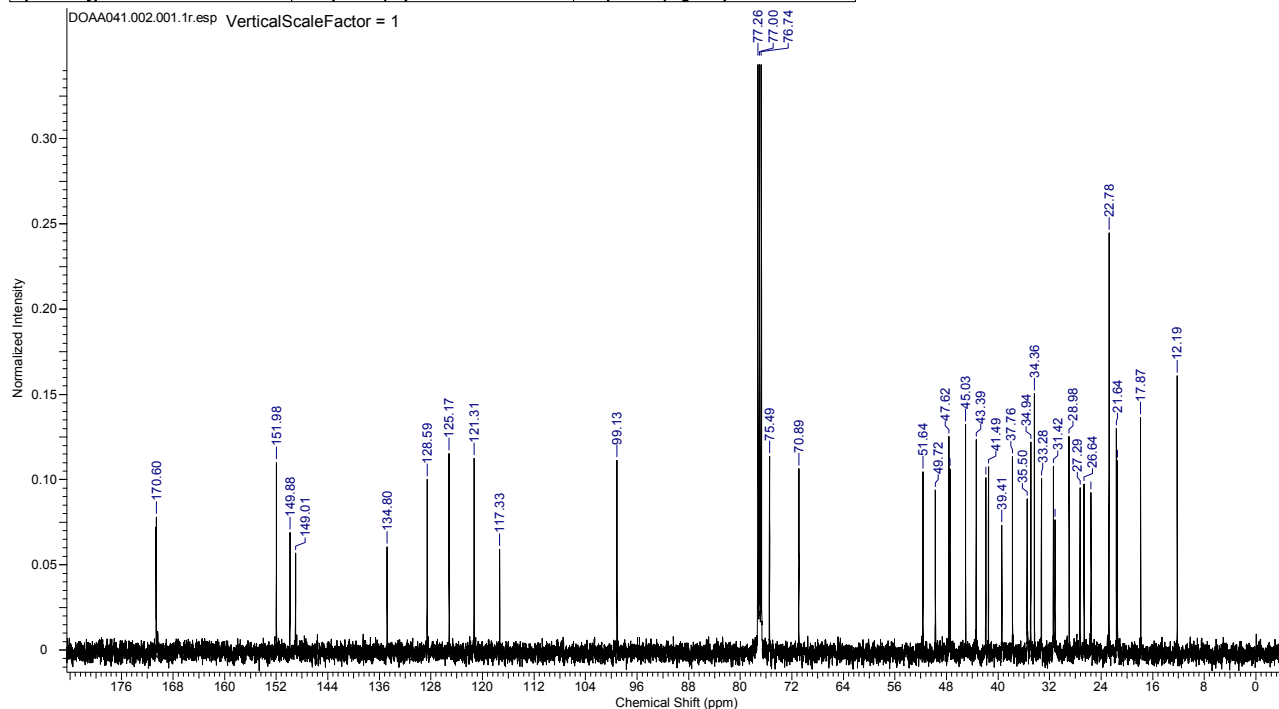

**Compound 53 (DO192):  $^1\text{H}$  NMR spectrum (500 MHz).** HPLC purity: method C: RT 11.493, area 97.92%; method D: RT 5.137, area 97.997 %.

2/25/2014 4:25:18 PM

| Number of Nuclei 0 H's |                                                                                                                                 |                   |                      |                        |              |                      |           |
|------------------------|---------------------------------------------------------------------------------------------------------------------------------|-------------------|----------------------|------------------------|--------------|----------------------|-----------|
| Acquisition Time (sec) | 3.1261                                                                                                                          | Date              | 26 Aug 2009 15:47:44 |                        |              |                      |           |
| File Name              | C:\Users\Dejan Ovsenica\Documents\Radovi\Aminohinoliniski\DO152 i ostali\Recenzija\Spektri NMR_Star1\500 MHz\DOAA089\1\data\11r |                   | Date Stamp           | 26 Aug 2009 15:47:44   |              |                      |           |
| Frequency (MHz)        | 500.26                                                                                                                          | Nucleus           | $^1\text{H}$         | Number of Transients   | 16           | Origin               | spect     |
| Original Points Count  | 16384                                                                                                                           | Owner             | nmsru                | Points Count           | 32768        | Pulse Sequence       | zg30      |
| Receiver Gain          | 71.80                                                                                                                           | SW(cyclical) (Hz) | 5241.09              | Solvent                | CHLOROFORM-d | Spectrum Offset (Hz) | 2144.5515 |
| Spectrum Type          | STANDARD                                                                                                                        | Sweep Width (Hz)  | 5240.93              | Temperature (degree C) | 25.000       |                      |           |

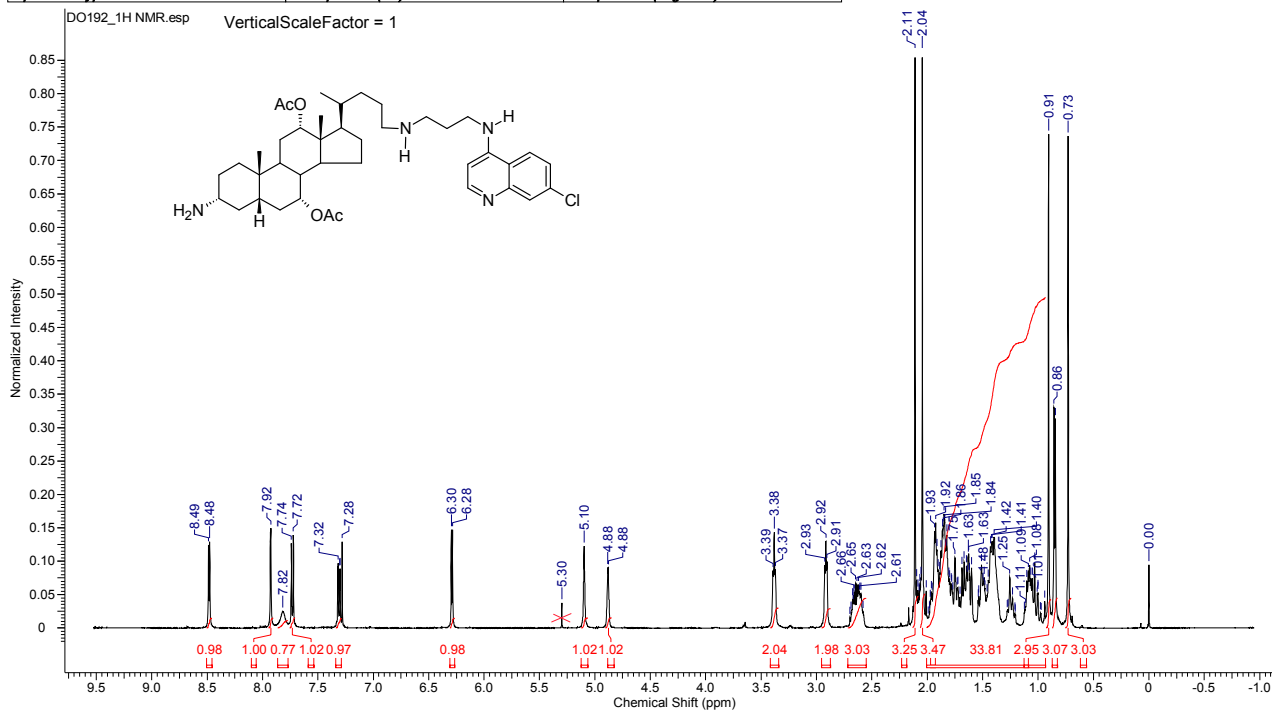

**Compound 53 (DO192):  $^{13}\text{C}$  NMR spectrum (125 MHz).**

2/25/2014 4:26:45 PM

| Number of Nuclei 0 C's |                                                                                                                                 |                   |                      |                        |              |                      |            |
|------------------------|---------------------------------------------------------------------------------------------------------------------------------|-------------------|----------------------|------------------------|--------------|----------------------|------------|
| Acquisition Time (sec) | 0.5505                                                                                                                          | Date              | 26 Aug 2009 14:07:28 |                        |              |                      |            |
| File Name              | C:\Users\Dejan Ovsenica\Documents\Radovi\Aminohinoliniski\DO152 i ostali\Recenzija\Spektri NMR_Star1\500 MHz\DOAA089\2\data\11r |                   | Date Stamp           | 26 Aug 2009 14:07:28   |              |                      |            |
| Frequency (MHz)        | 125.79                                                                                                                          | Nucleus           | $^{13}\text{C}$      | Number of Transients   | 662          | Origin               | spect      |
| Original Points Count  | 16384                                                                                                                           | Owner             | nmsru                | Points Count           | 32768        | Pulse Sequence       | zgpg30     |
| Receiver Gain          | 912.00                                                                                                                          | SW(cyclical) (Hz) | 29761.90             | Solvent                | CHLOROFORM-d | Spectrum Offset (Hz) | 12571.2354 |
| Spectrum Type          | STANDARD                                                                                                                        | Sweep Width (Hz)  | 29761.00             | Temperature (degree C) | 25.100       |                      |            |

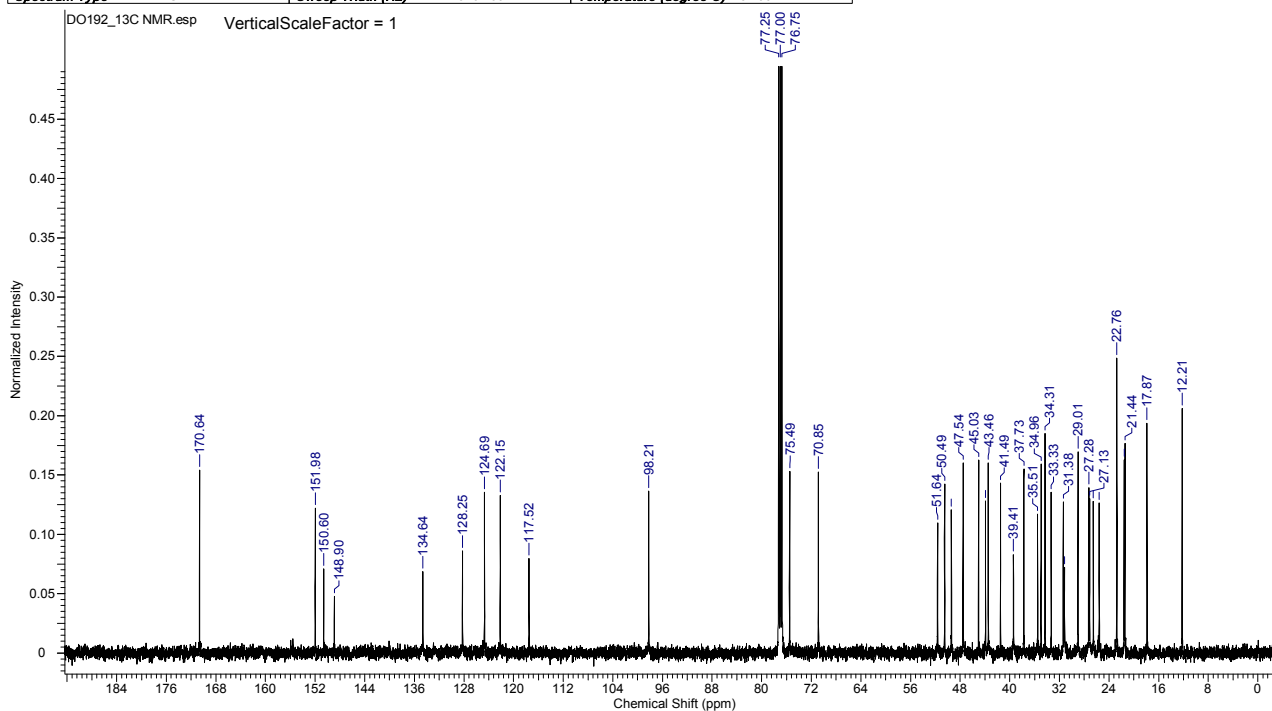

**Compound 54 (ST13):  $^1\text{H}$  NMR spectrum (500 MHz).** HPLC purity: method A: RT 1.905, area 99.44%; method C: RT 11.413, area 96.83 %.

2/26/2014 7:30:53 PM

| Number of Nuclei 0 H's |                                                                                                                                   |                   |                      |                        |              |                      |           |
|------------------------|-----------------------------------------------------------------------------------------------------------------------------------|-------------------|----------------------|------------------------|--------------|----------------------|-----------|
| Acquisition Time (sec) | 2.7394                                                                                                                            | Date              | 29 Mar 2012 09:21:36 |                        |              |                      |           |
| File Name              | C:\Users\Dejan Ovsenica\Documents\Radovi\Aminohinoliniski\DO152 i ostali\Recenzija\Spektri NMR_ Stari\500 MHz\UKAA0771\pdata\111r |                   | Date Stamp           | 29 Mar 2012 09:21:36   |              |                      |           |
| Frequency (MHz)        | 500.26                                                                                                                            | Nucleus           | $^1\text{H}$         | Number of Transients   | 16           | Origin               | spect     |
| Original Points Count  | 16384                                                                                                                             | Owner             | nmsu                 | Points Count           | 32768        | Pulse Sequence       | zq30      |
| Receiver Gain          | 71.80                                                                                                                             | SW(cyclical) (Hz) | 5980.86              | Solvent                | CHLOROFORM-d | Spectrum Offset (Hz) | 2546.4924 |
| Spectrum Type          | STANDARD                                                                                                                          | Sweep Width (Hz)  | 5980.68              | Temperature (degree C) | 25.000       |                      |           |

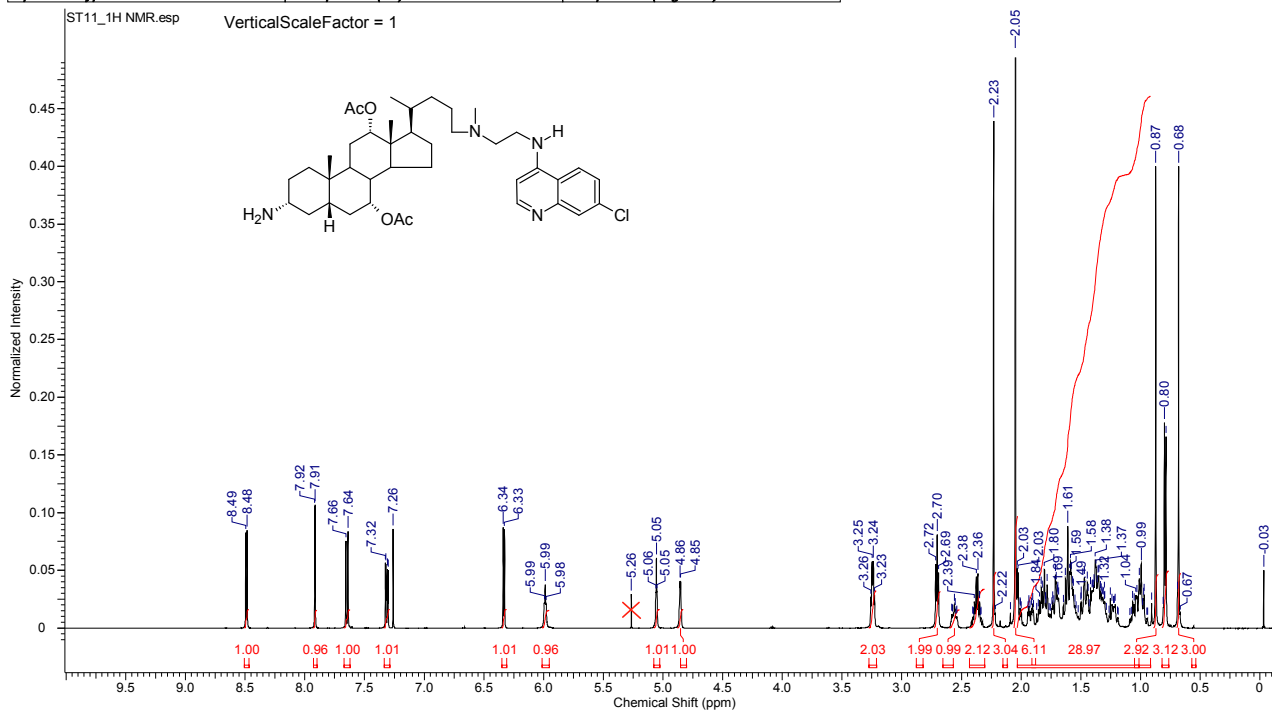

**Compound 54 (ST13):  $^{13}\text{C}$  NMR spectrum (125 MHz).**

2/25/2014 4:39:44 PM

| Number of Nuclei 0 C's |                                                                                                                                   |                   |                      |                        |              |                      |            |
|------------------------|-----------------------------------------------------------------------------------------------------------------------------------|-------------------|----------------------|------------------------|--------------|----------------------|------------|
| Acquisition Time (sec) | 0.5505                                                                                                                            | Date              | 29 Mar 2012 09:21:36 |                        |              |                      |            |
| File Name              | C:\Users\Dejan Ovsenica\Documents\Radovi\Aminohinoliniski\DO152 i ostali\Recenzija\Spektri NMR_ Stari\500 MHz\UKAA0772\pdata\111r |                   | Date Stamp           | 29 Mar 2012 09:21:36   |              |                      |            |
| Frequency (MHz)        | 125.79                                                                                                                            | Nucleus           | $^{13}\text{C}$      | Number of Transients   | 42           | Origin               | spect      |
| Original Points Count  | 16384                                                                                                                             | Owner             | nmsu                 | Points Count           | 32768        | Pulse Sequence       | zqpg30     |
| Receiver Gain          | 1030.00                                                                                                                           | SW(cyclical) (Hz) | 29761.90             | Solvent                | CHLOROFORM-d | Spectrum Offset (Hz) | 12567.7393 |
| Spectrum Type          | STANDARD                                                                                                                          | Sweep Width (Hz)  | 29761.00             | Temperature (degree C) | 25.400       |                      |            |

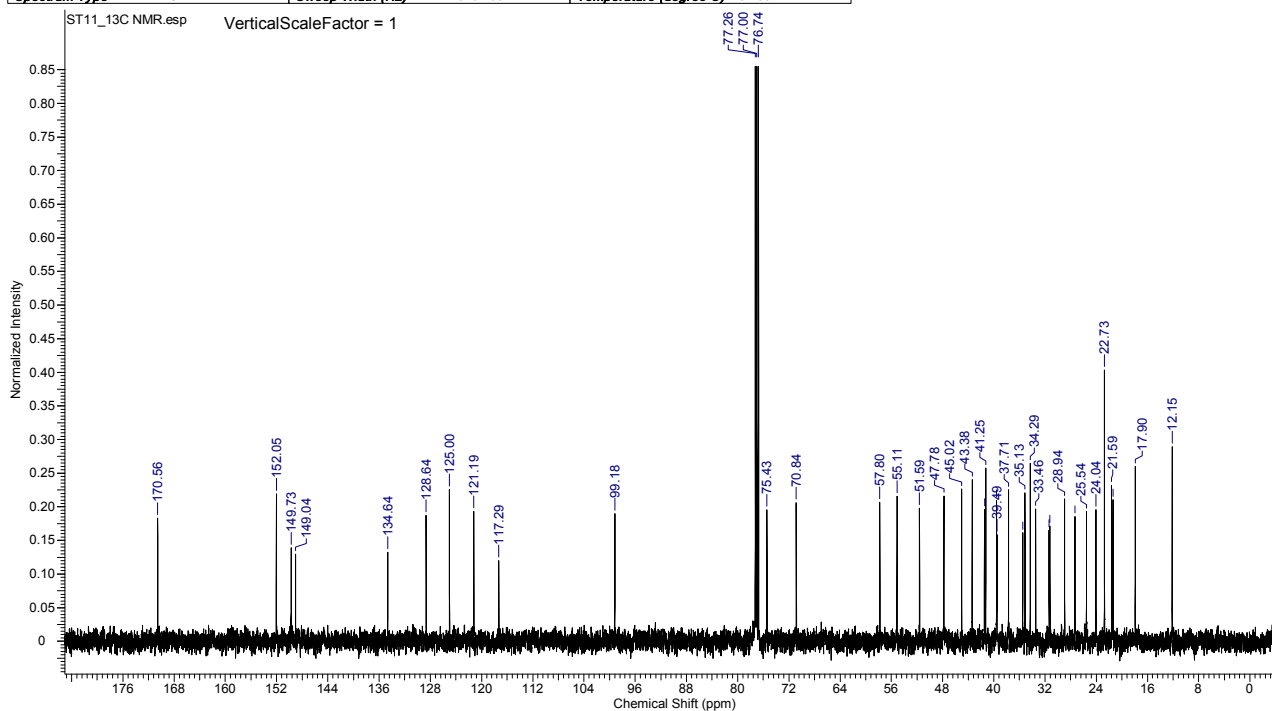

**Compound 55 (MV29):**  $^1\text{H}$  NMR spectrum (500 MHz). HPLC purity: method A: RT 2.240, area 96.94 %; method B: RT 1.792, area 98.41 %.

2/26/2014 5:53:24 PM

| Number of Nuclei 0 H's |                                                                                                                        |                   |                      |                        |                      |
|------------------------|------------------------------------------------------------------------------------------------------------------------|-------------------|----------------------|------------------------|----------------------|
| Acquisition Time (sec) | 3.2506                                                                                                                 | Date              | 18 Dec 2009 12:58:56 | Date Stamp             | 18 Dec 2009 12:58:56 |
| File Name              | C:\Users\Dejan Oспенica\Documents\Radovi\Aminohinoliniski\DO152 i ostali\Recenzija\Spektri NMR_Ostalo\MV29\1\data\111r |                   |                      |                        |                      |
| Frequency (MHz)        | 500.26                                                                                                                 | Nucleus           | $^1\text{H}$         | Number of Transients   | 16                   |
| Original Points Count  | 16384                                                                                                                  | Owner             | nmrsu                | Points Count           | 32768                |
| Receiver Gain          | 256.00                                                                                                                 | SW(cyclical) (Hz) | 5040.32              | Solvent                | CHLOROFORM-d         |
| Spectrum Offset (Hz)   | 2142.3103                                                                                                              | Spectrum Type     | STANDARD             | Sweep Width (Hz)       | 5040.17              |
|                        |                                                                                                                        |                   |                      | Temperature (degree C) | 25.000               |

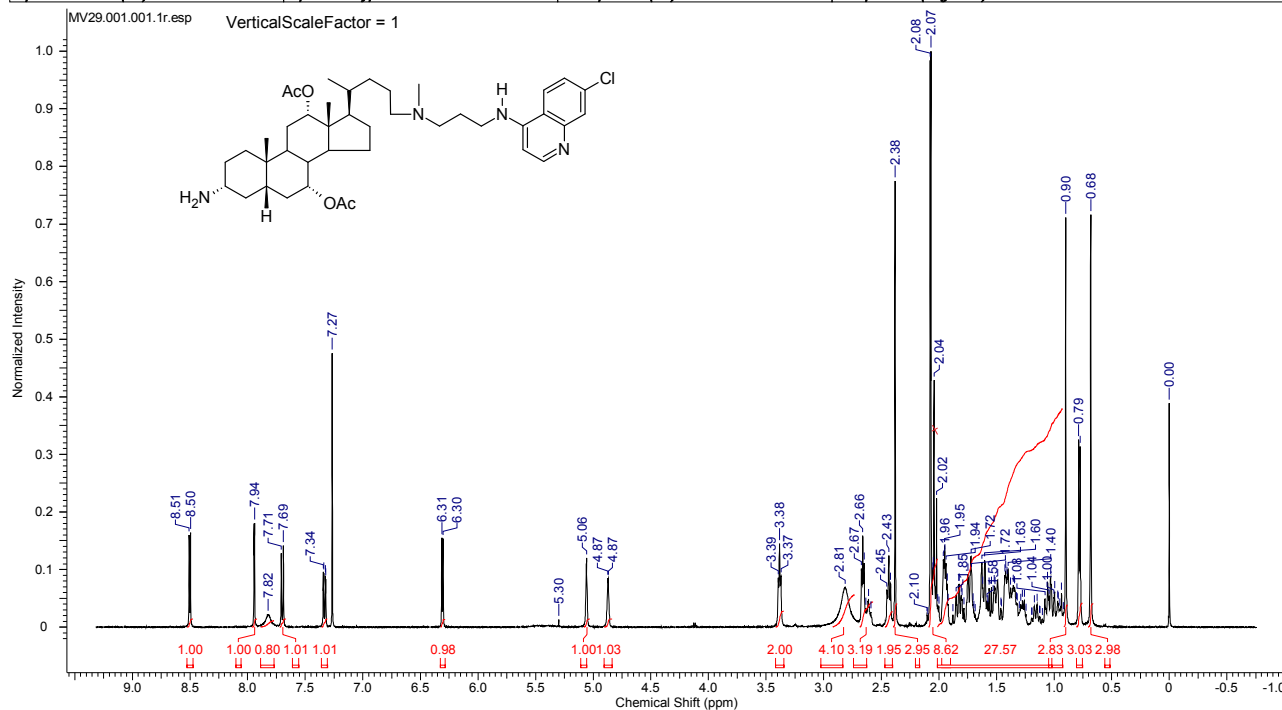

**Compound 55 (MV29):**  $^{13}\text{C}$  NMR spectrum (125 MHz).

2/26/2014 5:55:10 PM

| Number of Nuclei 0 C's |                                                                                                                        |                   |                      |                        |                      |
|------------------------|------------------------------------------------------------------------------------------------------------------------|-------------------|----------------------|------------------------|----------------------|
| Acquisition Time (sec) | 0.5505                                                                                                                 | Date              | 18 Dec 2009 12:22:40 | Date Stamp             | 18 Dec 2009 12:22:40 |
| File Name              | C:\Users\Dejan Oспенica\Documents\Radovi\Aminohinoliniski\DO152 i ostali\Recenzija\Spektri NMR_Ostalo\MV29\2\data\111r |                   |                      |                        |                      |
| Frequency (MHz)        | 125.79                                                                                                                 | Nucleus           | $^{13}\text{C}$      | Number of Transients   | 2007                 |
| Original Points Count  | 16384                                                                                                                  | Owner             | nmrsu                | Points Count           | 32768                |
| Receiver Gain          | 1030.00                                                                                                                | SW(cyclical) (Hz) | 29761.90             | Solvent                | CHLOROFORM-d         |
| Spectrum Type          | STANDARD                                                                                                               | Sweep Width (Hz)  | 29761.00             | Spectrum Offset (Hz)   | 13833.4160           |
|                        |                                                                                                                        |                   |                      | Temperature (degree C) | 25.000               |

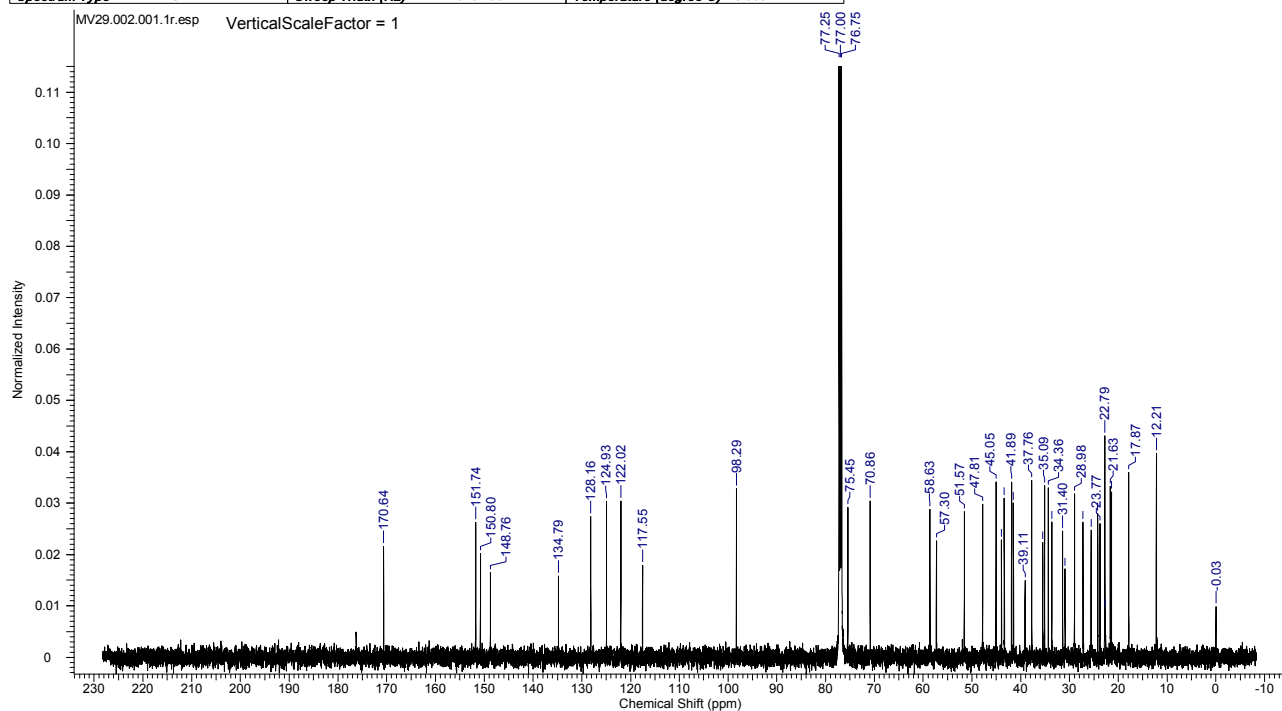

**Compound 56 (ST14):**  $^1\text{H}$  NMR spectrum (500 MHz). HPLC purity: method A: RT 1.849, area 98.82 %; method D: RT 5.179, area 98.67 %.

2/26/2014 7:32:06 PM

| Number of Nuclei 0 H's |                                                                                                                                  |                   |                      |                        |              |                      |           |
|------------------------|----------------------------------------------------------------------------------------------------------------------------------|-------------------|----------------------|------------------------|--------------|----------------------|-----------|
| Acquisition Time (sec) | 3.2681                                                                                                                           | Date              | 21 Jun 2010 10:46:56 |                        |              |                      |           |
| File Name              | C:\Users\Dejan Ovsenica\Documents\Radovi\Aminohinoliniski\DO152 i ostali\Recenzija\Spektri NMR_Star1500 MHz\STAA0381\1\data\111r |                   | Date Stamp           | 21 Jun 2010 10:46:56   |              |                      |           |
| Frequency (MHz)        | 500.26                                                                                                                           | Nucleus           | $^1\text{H}$         | Number of Transients   | 16           | Origin               | spect     |
| Original Points Count  | 16384                                                                                                                            | Owner             | nmsru                | Points Count           | 32768        | Pulse Sequence       | zg30      |
| Receiver Gain          | 256.00                                                                                                                           | SW(cyclical) (Hz) | 5013.37              | Solvent                | CHLOROFORM-d | Spectrum Offset (Hz) | 2124.4246 |
| Spectrum Type          | STANDARD                                                                                                                         | Sweep Width (Hz)  | 5013.22              | Temperature (degree C) | 25.000       |                      |           |

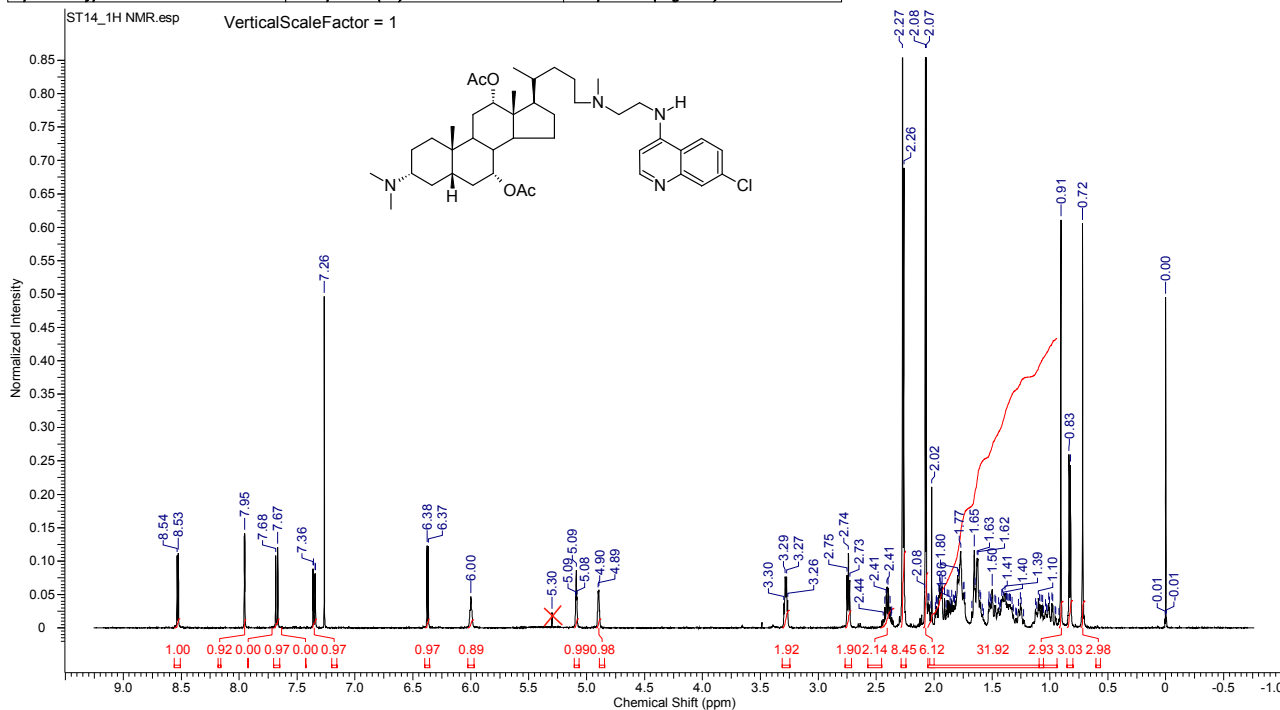

**Compound 56 (ST14):**  $^{13}\text{C}$  NMR spectrum (125 MHz).

2/25/2014 4:44:35 PM

| Number of Nuclei 0 C's |                                                                                                                                  |                   |                      |                        |              |                      |            |
|------------------------|----------------------------------------------------------------------------------------------------------------------------------|-------------------|----------------------|------------------------|--------------|----------------------|------------|
| Acquisition Time (sec) | 0.5505                                                                                                                           | Date              | 21 Jun 2010 10:57:36 |                        |              |                      |            |
| File Name              | C:\Users\Dejan Ovsenica\Documents\Radovi\Aminohinoliniski\DO152 i ostali\Recenzija\Spektri NMR_Star1500 MHz\STAA0381\2\data\111r |                   | Date Stamp           | 21 Jun 2010 10:57:36   |              |                      |            |
| Frequency (MHz)        | 125.79                                                                                                                           | Nucleus           | $^{13}\text{C}$      | Number of Transients   | 1402         | Origin               | spect      |
| Original Points Count  | 16384                                                                                                                            | Owner             | nmsru                | Points Count           | 32768        | Pulse Sequence       | zgpg30     |
| Receiver Gain          | 1030.00                                                                                                                          | SW(cyclical) (Hz) | 29761.90             | Solvent                | CHLOROFORM-d | Spectrum Offset (Hz) | 13833.7441 |
| Spectrum Type          | STANDARD                                                                                                                         | Sweep Width (Hz)  | 29761.00             | Temperature (degree C) | 25.000       |                      |            |

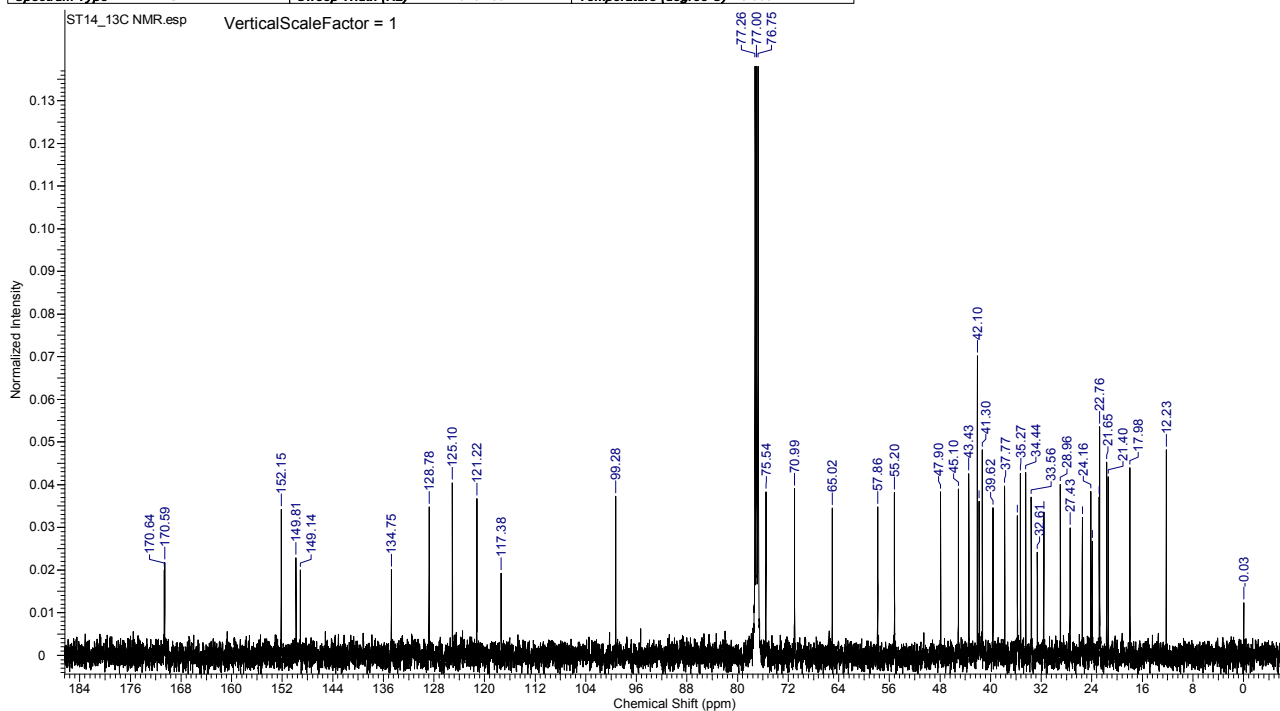



**Compound 57 (MV40):**  $^1\text{H}$  NMR spectrum (500 MHz). HPLC purity: method C: RT 9.682, area 95.17 %; method D: RT 5.092, area 98.86 %.

2/25/2014 4:48:20 PM

| Number of Nuclei 0 H's |                                                                                                                                 |                   |                      |                        |              |                      |           |
|------------------------|---------------------------------------------------------------------------------------------------------------------------------|-------------------|----------------------|------------------------|--------------|----------------------|-----------|
| Acquisition Time (sec) | 3.2637                                                                                                                          | Date              | 15 Mar 2010 11:25:04 |                        |              |                      |           |
| File Name              | C:\Users\Dejan Osenica\Documents\Radovi\Aminohinoliniski\DO152 i ostali\Recenzijal\Spektri NMR_ Stari\500 MHz\MV40\1\pdata\111r |                   | Date Stamp           | 15 Mar 2010 11:25:04   |              |                      |           |
| Frequency (MHz)        | 500.26                                                                                                                          | Nucleus           | $^1\text{H}$         | Number of Transients   | 16           | Origin               | spect     |
| Original Points Count  | 16384                                                                                                                           | Owner             | nmsu                 | Points Count           | 32768        | Pulse Sequence       | zg30      |
| Receiver Gain          | 228.00                                                                                                                          | SW(cyclical) (Hz) | 5020.08              | Solvent                | CHLOROFORM-d | Spectrum Offset (Hz) | 2122.0854 |
| Spectrum Type          | STANDARD                                                                                                                        | Sweep Width (Hz)  | 5019.93              | Temperature (degree C) | 25.000       |                      |           |

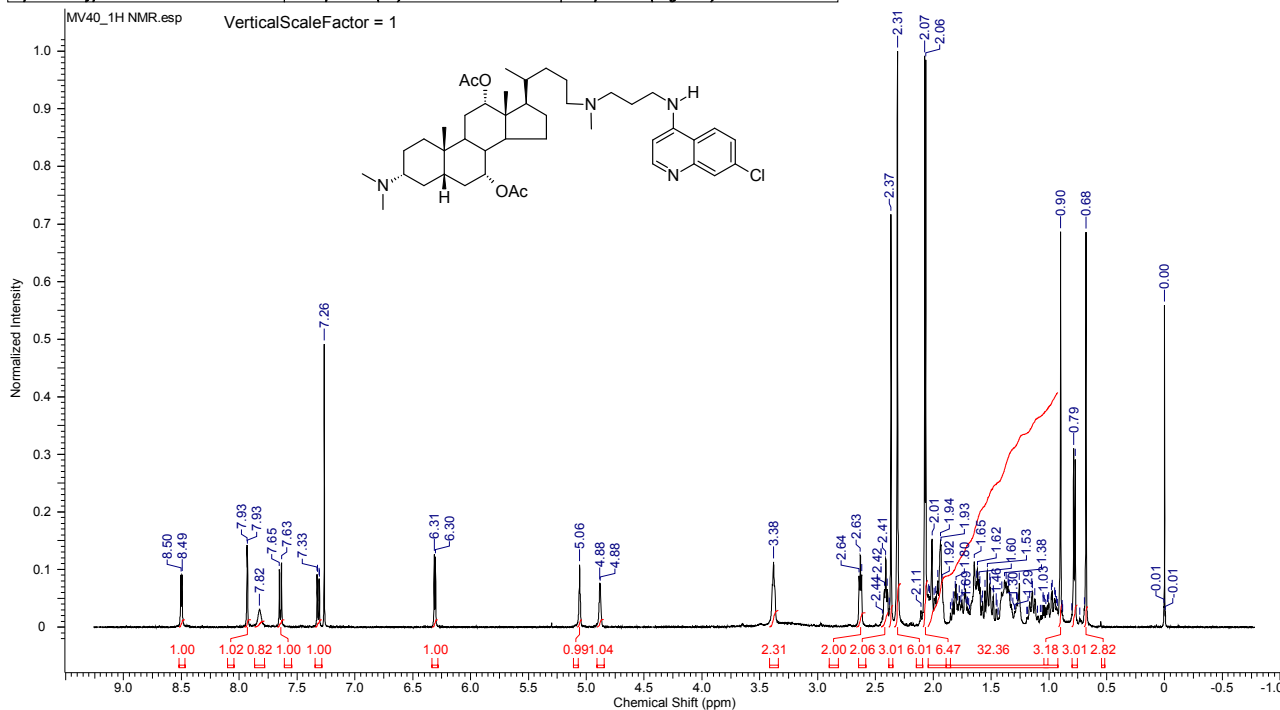

**Compound 57 (MV40):**  $^{13}\text{C}$  NMR spectrum (125 MHz).

3/1/2014 8:59:52 PM

| Number of Nuclei 0 C's |                                                                                                                                 |                   |                      |                        |              |                      |            |
|------------------------|---------------------------------------------------------------------------------------------------------------------------------|-------------------|----------------------|------------------------|--------------|----------------------|------------|
| Acquisition Time (sec) | 0.5505                                                                                                                          | Date              | 15 Mar 2010 11:31:28 |                        |              |                      |            |
| File Name              | C:\Users\Dejan Osenica\Documents\Radovi\Aminohinoliniski\DO152 i ostali\Recenzijal\Spektri NMR_ Stari\500 MHz\MV40\2\pdata\111r |                   | Date Stamp           | 15 Mar 2010 11:31:28   |              |                      |            |
| Frequency (MHz)        | 125.79                                                                                                                          | Nucleus           | $^{13}\text{C}$      | Number of Transients   | 1205         | Origin               | spect      |
| Original Points Count  | 16384                                                                                                                           | Owner             | nmsu                 | Points Count           | 32768        | Pulse Sequence       | zgpg30     |
| Receiver Gain          | 1030.00                                                                                                                         | SW(cyclical) (Hz) | 29761.90             | Solvent                | CHLOROFORM-d | Spectrum Offset (Hz) | 13833.4434 |
| Spectrum Type          | STANDARD                                                                                                                        | Sweep Width (Hz)  | 29761.00             | Temperature (degree C) | 25.000       |                      |            |

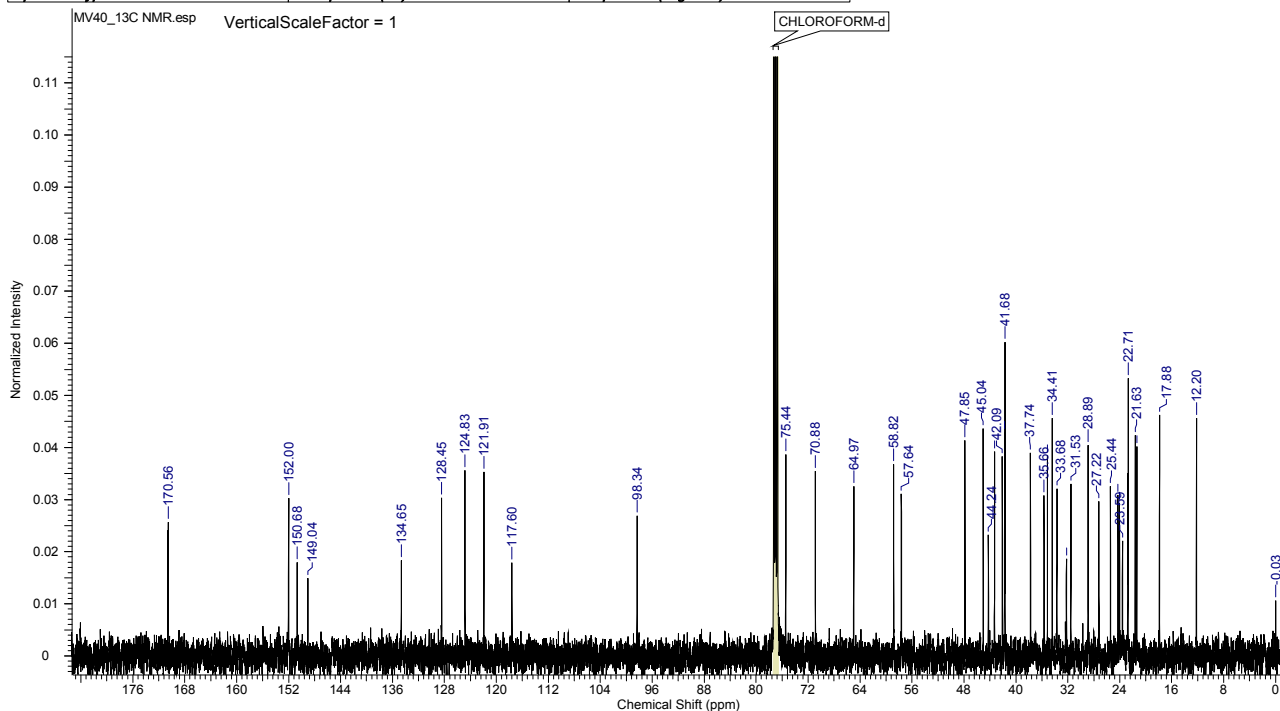

**Compound 58 (DO178):  $^1\text{H}$  NMR spectrum (500 MHz). HPLC purity: method C: RT=11.618, area 99.15 %; method D: RT 6.020, area 96.86 %.**

2/26/2014 6:20:08 PM

| Number of Nuclei 0 H's |                                                                                                                                 |                   |                      |                        |              |                      |           |
|------------------------|---------------------------------------------------------------------------------------------------------------------------------|-------------------|----------------------|------------------------|--------------|----------------------|-----------|
| Acquisition Time (sec) | 3.1261                                                                                                                          | Date              | 04 Mar 2008 13:33:04 |                        |              |                      |           |
| File Name              | C:\Users\Dejan Opšenica\Documents\Radovi\Aminohinoliniski\DO152 i ostali\Recenzija\Spektri NMR_Ostalo\DO178\DOAA036a\1\data\11r |                   | Date Stamp           | 04 Mar 2008 13:33:04   |              |                      |           |
| Frequency (MHz)        | 500.26                                                                                                                          | Nucleus           | $^1\text{H}$         | Number of Transients   | 16           | Origin               | spect     |
| Original Points Count  | 16384                                                                                                                           | Owner             | nmsru                | Points Count           | 16384        | Pulse Sequence       | zg30      |
| Receiver Gain          | 114.00                                                                                                                          | SW(cyclical) (Hz) | 5241.09              | Solvent                | CHLOROFORM-d | Spectrum Offset (Hz) | 2188.8513 |
| Spectrum Type          | STANDARD                                                                                                                        | Sweep Width (Hz)  | 5240.77              | Temperature (degree C) | 25.000       |                      |           |

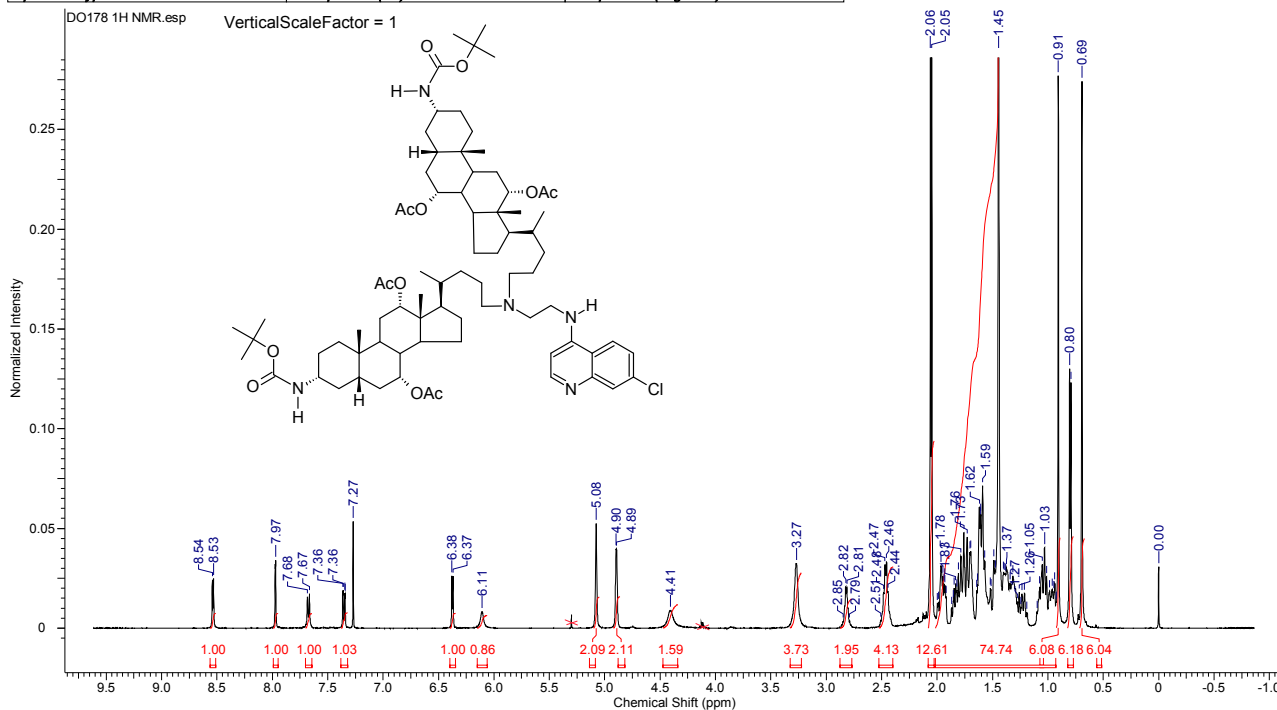

**Compound 58 (DO178):  $^{13}\text{C}$  NMR spectrum (125 MHz).**

2/26/2014 6:24:23 PM

| Number of Nuclei 0 C's |                                                                                                                                 |                   |                      |                        |              |                      |            |
|------------------------|---------------------------------------------------------------------------------------------------------------------------------|-------------------|----------------------|------------------------|--------------|----------------------|------------|
| Acquisition Time (sec) | 1.1010                                                                                                                          | Date              | 04 Mar 2008 13:41:36 |                        |              |                      |            |
| File Name              | C:\Users\Dejan Opšenica\Documents\Radovi\Aminohinoliniski\DO152 i ostali\Recenzija\Spektri NMR_Ostalo\DO178\DOAA036a\2\data\11r |                   | Date Stamp           | 04 Mar 2008 13:41:36   |              |                      |            |
| Frequency (MHz)        | 125.79                                                                                                                          | Nucleus           | $^{13}\text{C}$      | Number of Transients   | 869          | Origin               | spect      |
| Original Points Count  | 32768                                                                                                                           | Owner             | nmsru                | Points Count           | 32768        | Pulse Sequence       | zgpg30     |
| Receiver Gain          | 1620.00                                                                                                                         | SW(cyclical) (Hz) | 29761.90             | Solvent                | CHLOROFORM-d | Spectrum Offset (Hz) | 13833.4043 |
| Spectrum Type          | STANDARD                                                                                                                        | Sweep Width (Hz)  | 29761.00             | Temperature (degree C) | 24.900       |                      |            |

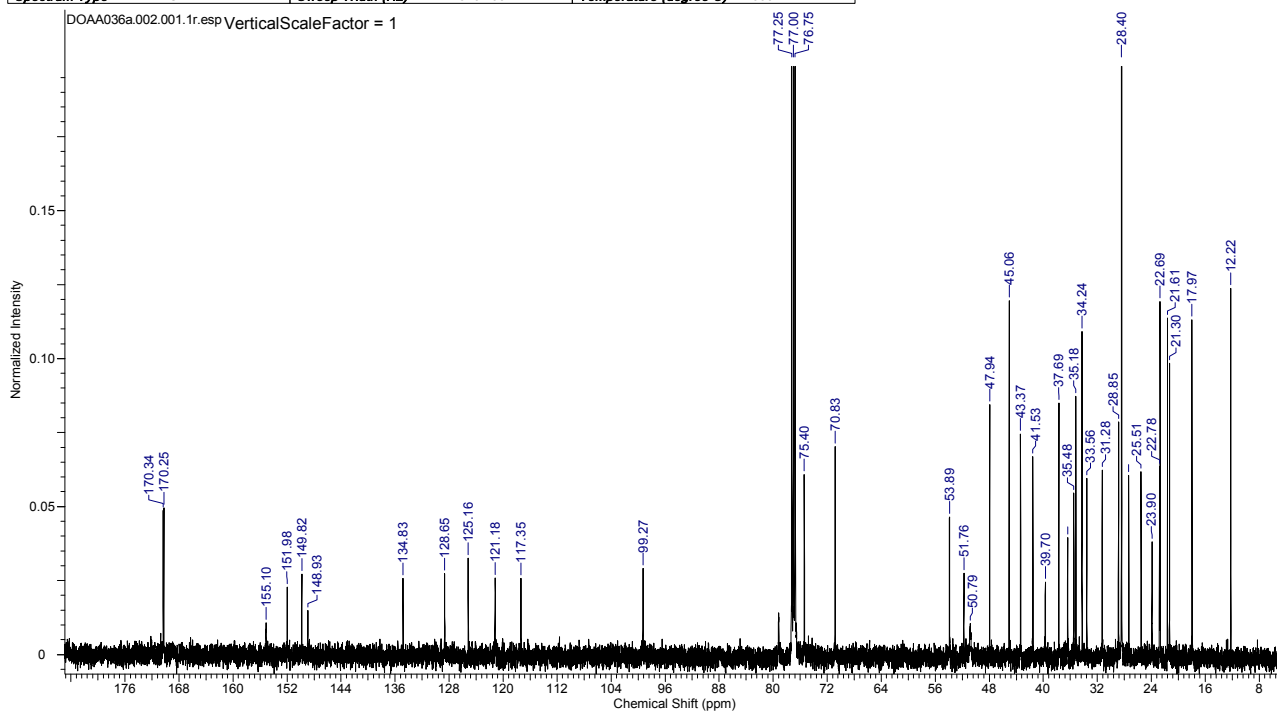

**Compound 59 (MV31):**  $^1\text{H}$  NMR spectrum (500 MHz). HPLC purity: method C: RT 11,964, area 97.93 %; method D: RT 5.892, area 96.83 %.

2/26/2014 7:33:28 PM

| Number of Nuclei 0 H's |                                                                                                                                    |                   |                      |                        |              |                      |           |
|------------------------|------------------------------------------------------------------------------------------------------------------------------------|-------------------|----------------------|------------------------|--------------|----------------------|-----------|
| Acquisition Time (sec) | 3.3620                                                                                                                             | Date              | 11 Nov 2009 13:30:56 |                        |              |                      |           |
| File Name              | C:\Users\Dejan Ospenica\Documents\Radovi\Aminohinoliniski\DO152 i ostali\Recenzija\Spektri NMR_ Stari\500 MHz\MVAA018a\1\pdata\11r |                   | Date Stamp           | 11 Nov 2009 13:30:56   |              |                      |           |
| Frequency (MHz)        | 500.26                                                                                                                             | Nucleus           | $^1\text{H}$         | Number of Transients   | 16           | Origin               | spect     |
| Original Points Count  | 16384                                                                                                                              | Owner             | nmrsu                | Points Count           | 32768        | Pulse Sequence       | zg30      |
| Receiver Gain          | 50.80                                                                                                                              | SW(cyclical) (Hz) | 4873.29              | Solvent                | CHLOROFORM-d | Spectrum Offset (Hz) | 2316.7156 |
| Spectrum Type          | STANDARD                                                                                                                           | Sweep Width (Hz)  | 4873.15              | Temperature (degree C) | 25.000       |                      |           |

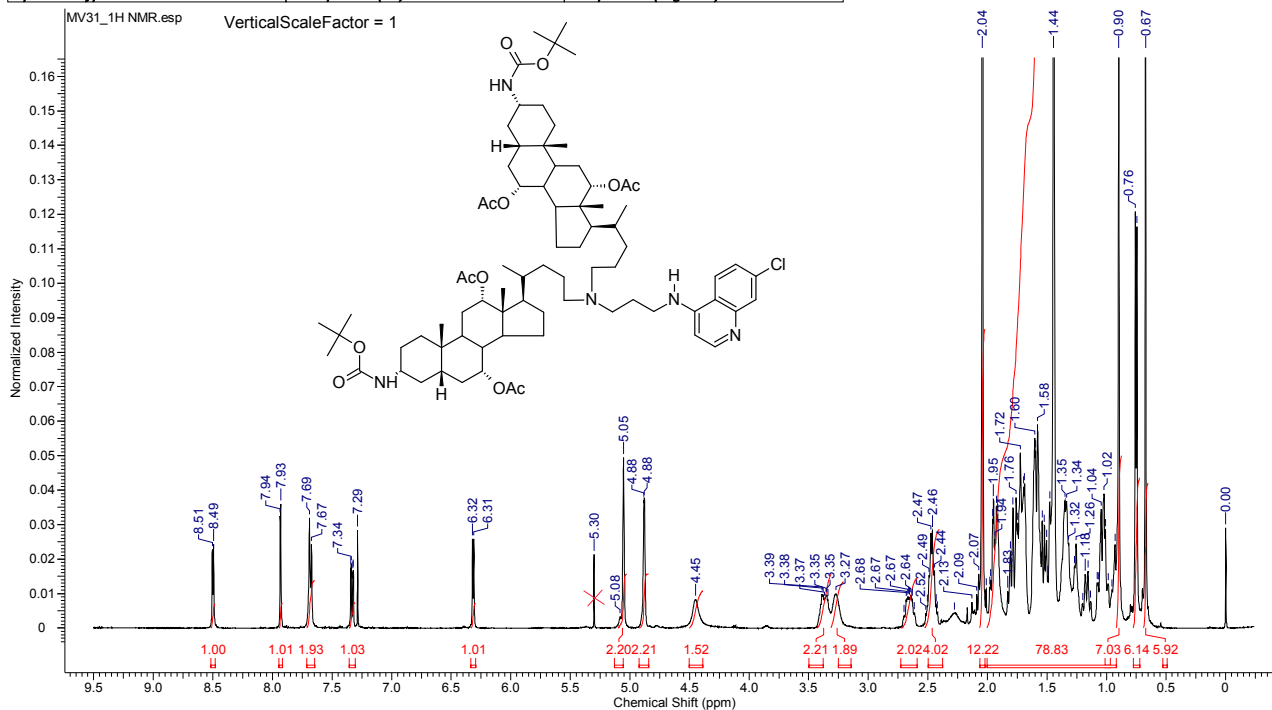

**Compound 59 (MV31):**  $^{13}\text{C}$  NMR spectrum (125 MHz).

2/25/2014 5:06:16 PM

| Number of Nuclei 0 C's |                                                                                                                                    |                   |                      |                        |              |                      |            |
|------------------------|------------------------------------------------------------------------------------------------------------------------------------|-------------------|----------------------|------------------------|--------------|----------------------|------------|
| Acquisition Time (sec) | 0.5505                                                                                                                             | Date              | 11 Nov 2009 13:39:28 |                        |              |                      |            |
| File Name              | C:\Users\Dejan Ospenica\Documents\Radovi\Aminohinoliniski\DO152 i ostali\Recenzija\Spektri NMR_ Stari\500 MHz\MVAA018a\2\pdata\11r |                   | Date Stamp           | 11 Nov 2009 13:39:28   |              |                      |            |
| Frequency (MHz)        | 125.79                                                                                                                             | Nucleus           | $^{13}\text{C}$      | Number of Transients   | 620          | Origin               | spect      |
| Original Points Count  | 16384                                                                                                                              | Owner             | nmrsu                | Points Count           | 32768        | Pulse Sequence       | zgpg30     |
| Receiver Gain          | 2050.00                                                                                                                            | SW(cyclical) (Hz) | 29761.90             | Solvent                | CHLOROFORM-d | Spectrum Offset (Hz) | 13827.9844 |
| Spectrum Type          | STANDARD                                                                                                                           | Sweep Width (Hz)  | 29761.00             | Temperature (degree C) | 25.000       |                      |            |

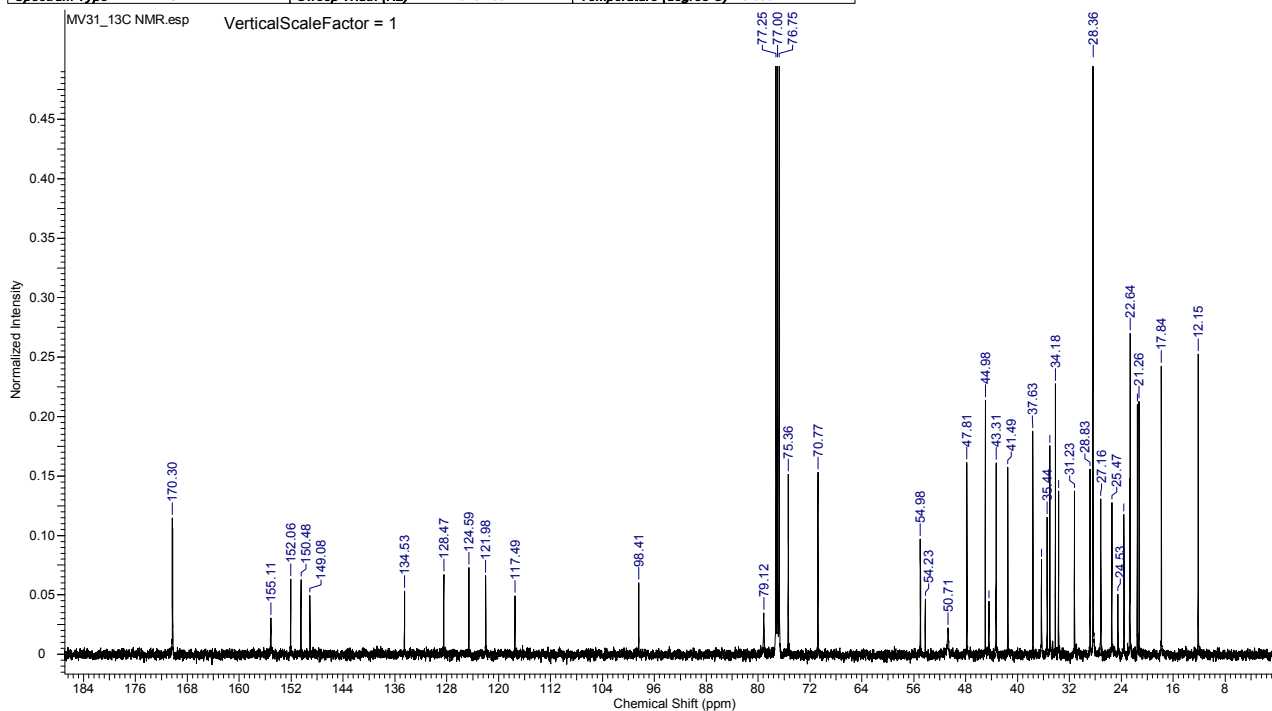

**Compound 60 (DO180):  $^1\text{H}$  NMR spectrum (500 MHz).** HPLC purity: method A: RT 1.838, area 97.10 %; method D: RT 5.321, area 96.33 %.

3/1/2014 10:04:28 PM

| Number of Nuclei 0 H's |                                                                                                                    |                        |                                   |                      |
|------------------------|--------------------------------------------------------------------------------------------------------------------|------------------------|-----------------------------------|----------------------|
| Acquisition Time (sec) | 2.1823                                                                                                             | Comment                | 5 mm BBO BB-1H/D Z-GRD Z8007/0118 |                      |
| Date Stamp             | 28 Feb 2014 09:44:48                                                                                               |                        | Date                              | 28 Feb 2014 09:44:48 |
| File Name              | C:\Users\Dejan Ospenica\Documents\Radovi\Aminohinolin\DO152\ostali\Recenzija\Spektri NMR novido180-nov11\data\111r |                        |                                   |                      |
| Frequency (MHz)        | 500.26                                                                                                             | Nucleus                | $^1\text{H}$                      |                      |
| Original Points Count  | 16384                                                                                                              | Owner                  | nrmrsu                            |                      |
| Receiver Gain          | 101.00                                                                                                             | SW(cyclical) (Hz)      | 7507.51                           |                      |
| Spectrum Type          | STANDARD                                                                                                           | Sweep Width (Hz)       | 7507.28                           |                      |
|                        |                                                                                                                    | Solvent                | CHLOROFORM-d                      |                      |
|                        |                                                                                                                    | Temperature (degree C) | 25.000                            |                      |
|                        |                                                                                                                    | Number of Transients   | 16                                |                      |
|                        |                                                                                                                    | Points Count           | 32768                             |                      |
|                        |                                                                                                                    | Origin                 | spect                             |                      |
|                        |                                                                                                                    | Pulse Sequence         | zq30                              |                      |
|                        |                                                                                                                    | Spectrum Offset (Hz)   | 3496.3342                         |                      |

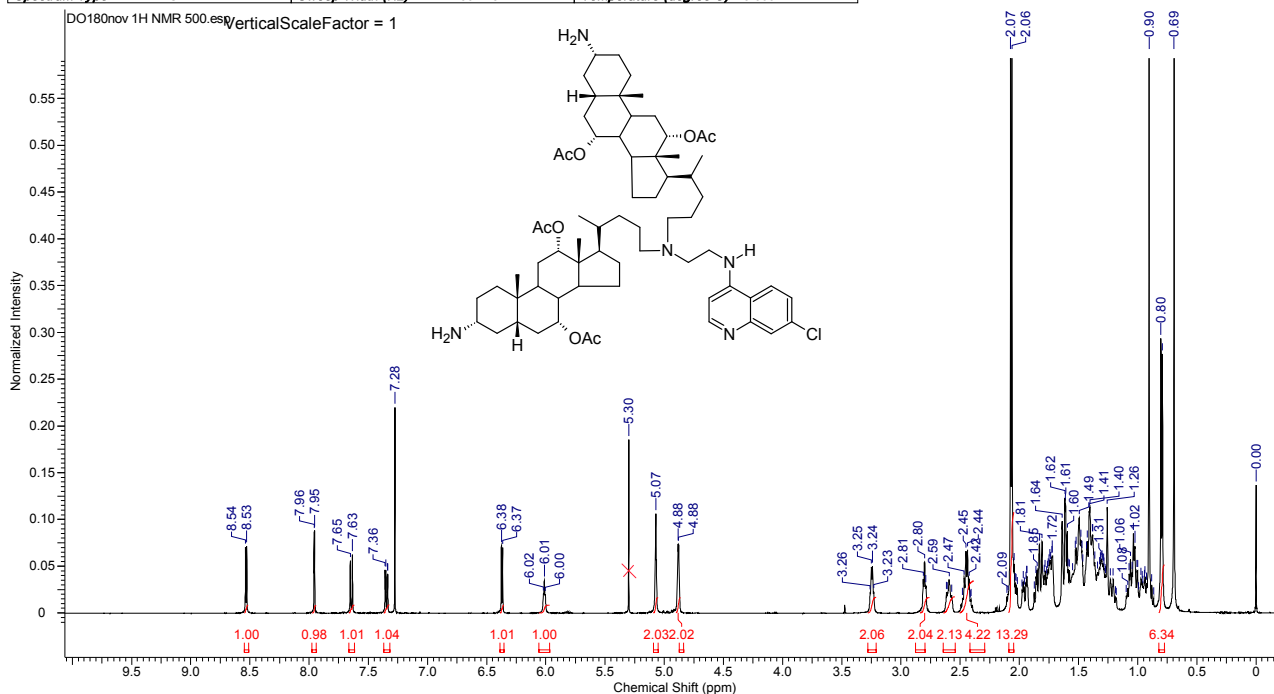

**Compound 60 (DO180):  $^{13}\text{C}$  NMR spectrum (125 MHz).**

3/1/2014 10:07:20 PM

| Number of Nuclei 0 C's |                                                                                                                   |                        |                                   |                      |
|------------------------|-------------------------------------------------------------------------------------------------------------------|------------------------|-----------------------------------|----------------------|
| Acquisition Time (sec) | 0.5505                                                                                                            | Comment                | 5 mm BBO BB-1H/D Z-GRD Z8007/0118 |                      |
| Date Stamp             | 28 Feb 2014 09:46:56                                                                                              |                        | Date                              | 28 Feb 2014 09:46:56 |
| File Name              | C:\Users\Dejan Ospenica\Documents\Radovi\Aminohinolin\DO152\ostali\Recenzija\Spektri NMR novido180-nov2\data\111r |                        |                                   |                      |
| Frequency (MHz)        | 125.79                                                                                                            | Nucleus                | $^{13}\text{C}$                   |                      |
| Original Points Count  | 16384                                                                                                             | Owner                  | nrmrsu                            |                      |
| Receiver Gain          | 2050.00                                                                                                           | SW(cyclical) (Hz)      | 29761.90                          |                      |
| Spectrum Type          | STANDARD                                                                                                          | Sweep Width (Hz)       | 29761.45                          |                      |
|                        |                                                                                                                   | Solvent                | CHLOROFORM-d                      |                      |
|                        |                                                                                                                   | Temperature (degree C) | 25.200                            |                      |
|                        |                                                                                                                   | Number of Transients   | 176                               |                      |
|                        |                                                                                                                   | Points Count           | 65536                             |                      |
|                        |                                                                                                                   | Origin                 | spect                             |                      |
|                        |                                                                                                                   | Pulse Sequence         | zqpg30                            |                      |
|                        |                                                                                                                   | Spectrum Offset (Hz)   | 13831.1650                        |                      |

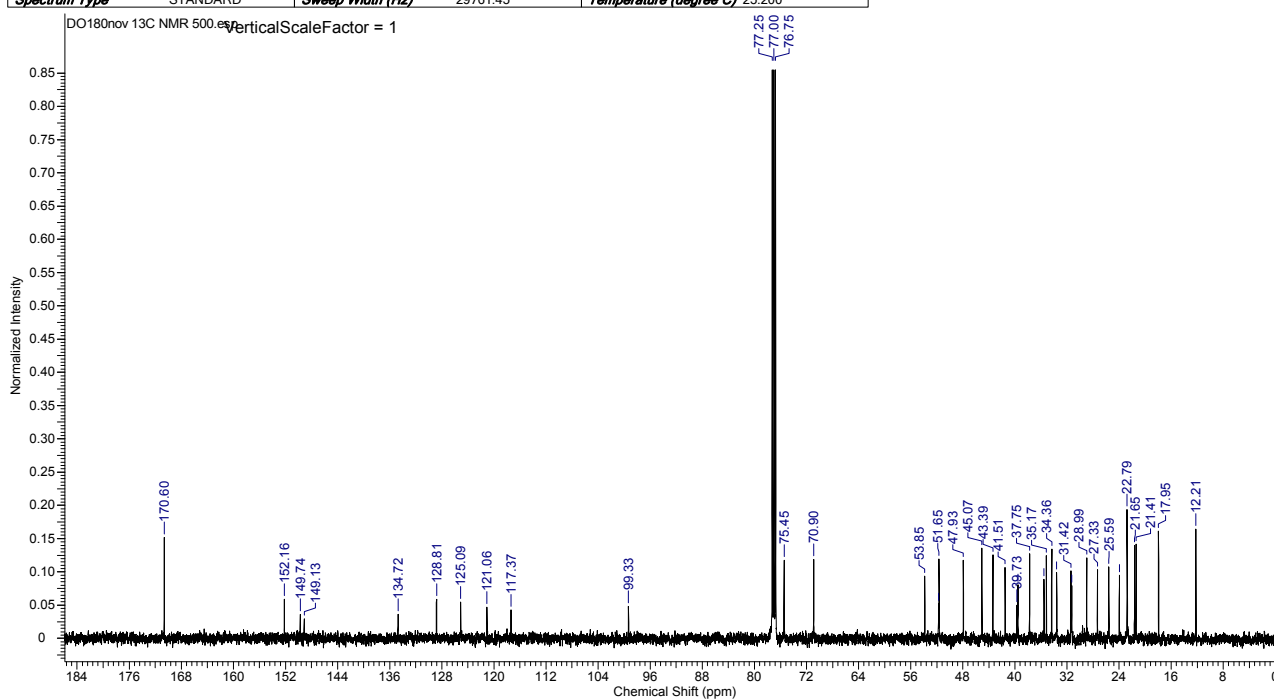

**Compound 61 (MV30):**  $^1\text{H}$  NMR spectrum (200 MHz). HPLC purity: method C: RT = 10.553, area 95.61 %; method D: RT 5.288, area 95.46 %.

2/25/2014 5:09:57 PM

| Number of Nuclei 0 H's |                                                                                                                               |                |              |                        |                     |
|------------------------|-------------------------------------------------------------------------------------------------------------------------------|----------------|--------------|------------------------|---------------------|
| Acquisition Time (sec) | 1.3913                                                                                                                        | Comment        | MV30         | Date                   | Dec 15 09           |
| File Name              | C:\Users\Dejan\Openical\Documents\Radovi\Aminohinolinski\DO152\ostali\Recenzijal\Spektri NMR_Staril200 MHz\MV30\hmv30.fid\fid |                |              |                        |                     |
| Frequency (MHz)        | 199.97                                                                                                                        | Nucleus        | $^1\text{H}$ | Number of Transients   | 55                  |
| Points Count           | 8192                                                                                                                          | Pulse Sequence | s2pul        | Receiver Gain          | 9.00                |
| Spectrum Offset (Hz)   | 1690.1111                                                                                                                     | Spectrum Type  | STANDARD     | Sweep Width (Hz)       | 4600.00             |
|                        |                                                                                                                               |                |              | Temperature (degree C) | AMBIENT TEMPERATURE |

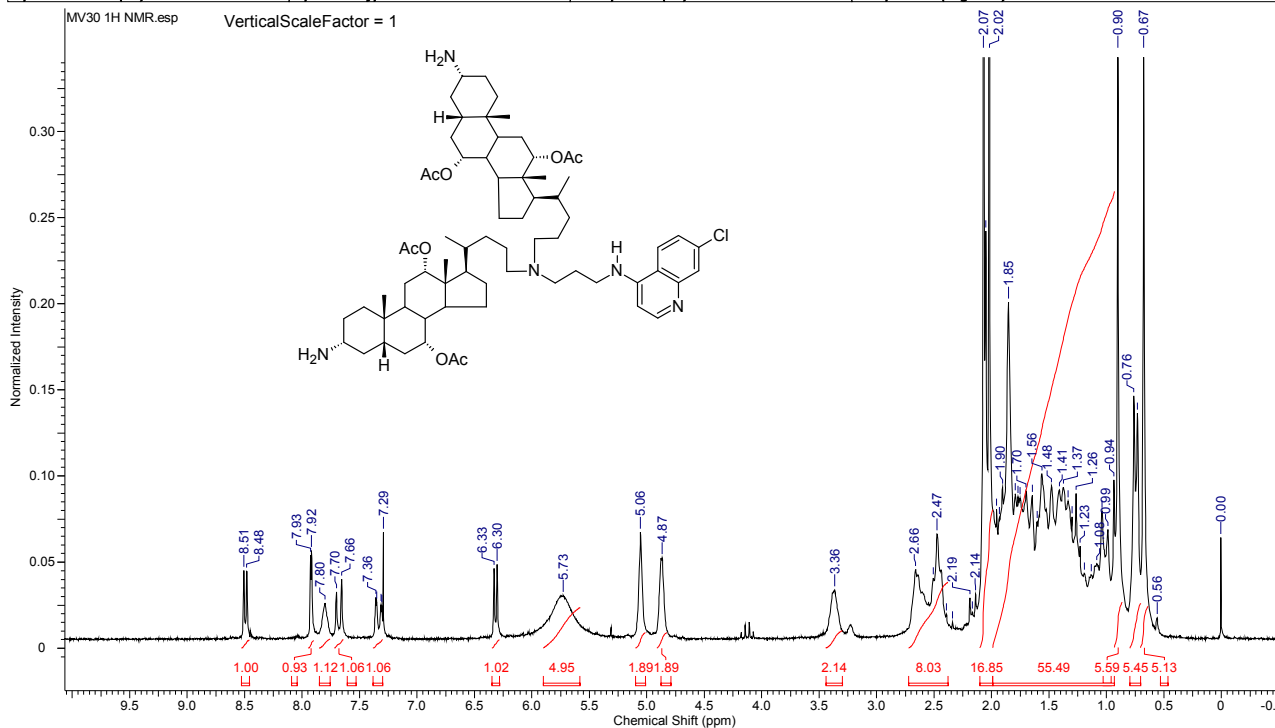

**Compound 61 (MV30):**  $^{13}\text{C}$  NMR spectrum (50 MHz).

3/1/2014 10:27:11 PM

| Number of Nuclei 0 C's |                                                                                                                               |                |                 |                        |                     |
|------------------------|-------------------------------------------------------------------------------------------------------------------------------|----------------|-----------------|------------------------|---------------------|
| Acquisition Time (sec) | 1.0667                                                                                                                        | Comment        | MV30            | Date                   | Dec 15 09           |
| File Name              | C:\Users\Dejan\Openical\Documents\Radovi\Aminohinolinski\DO152\ostali\Recenzijal\Spektri NMR_Staril200 MHz\MV30\cmv30.fid\fid |                |                 |                        |                     |
| Frequency (MHz)        | 50.29                                                                                                                         | Nucleus        | $^{13}\text{C}$ | Number of Transients   | 17172               |
| Points Count           | 16384                                                                                                                         | Pulse Sequence | s2pul           | Receiver Gain          | 25.00               |
| Spectrum Offset (Hz)   | 4813.8223                                                                                                                     | Spectrum Type  | STANDARD        | Sweep Width (Hz)       | 15000.00            |
|                        |                                                                                                                               |                |                 | Temperature (degree C) | AMBIENT TEMPERATURE |

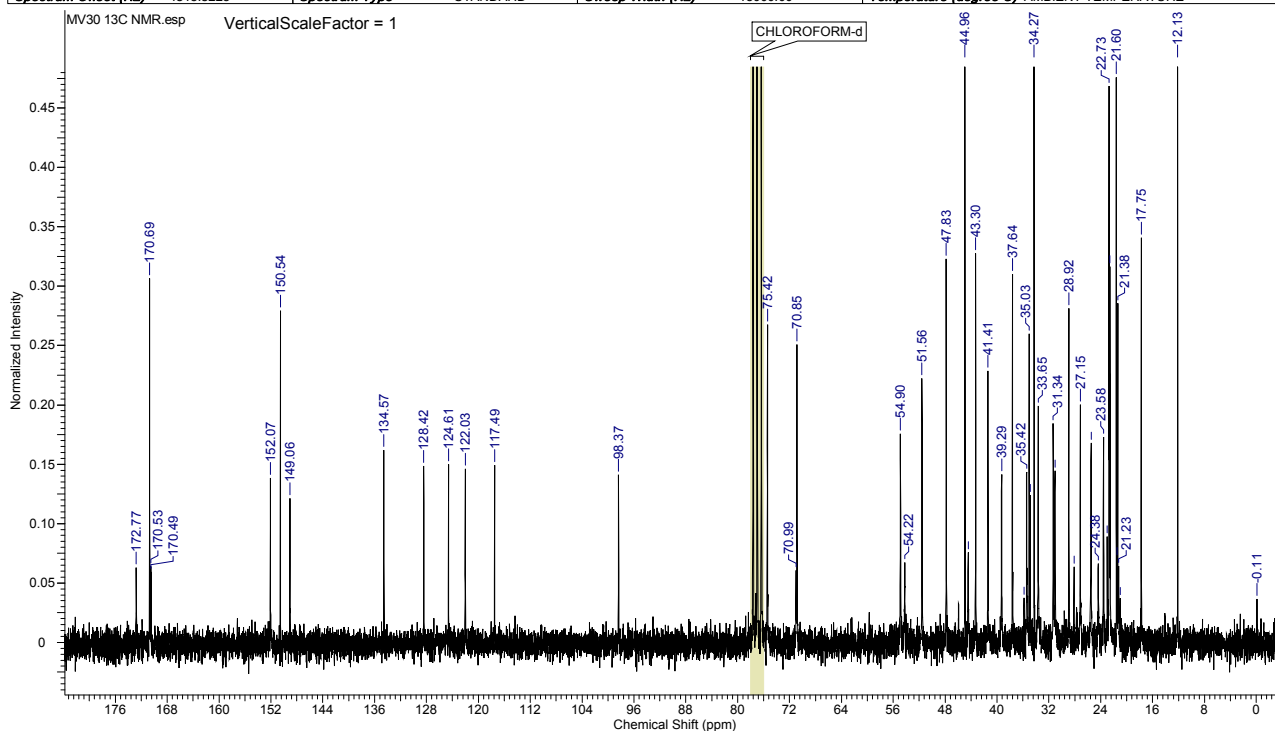

2/25/2014 5:12:22 PM

**Compound 61 (MV30): <sup>1</sup>H NMR spectrum (500 MHz).**

| Number of Nuclei 0 H's |                                                                                                                       |                        |                                   |                      |
|------------------------|-----------------------------------------------------------------------------------------------------------------------|------------------------|-----------------------------------|----------------------|
| Acquisition Time (sec) | 2.1823                                                                                                                | Comment                | 5 mm BBO BB-1H/D Z-GRD Z8007/0118 |                      |
| Date Stamp             | 22 Feb 2014 09:59:44                                                                                                  |                        | Date                              | 22 Feb 2014 09:59:44 |
| File Name              | C:\Users\Dejan Opsenica\Documents\Radovi\Aminohinolinolski\DO152\ostali\Recenzija\Spektri NMR nov\mv30nov1\pdata\111r |                        |                                   |                      |
| Frequency (MHz)        | 500.26                                                                                                                | Nucleus                | <sup>1</sup> H                    |                      |
| Original Points Count  | 16384                                                                                                                 | Owner                  | nimsu                             |                      |
| Receiver Gain          | 362.00                                                                                                                | SW(cyclical) (Hz)      | 7507.51                           |                      |
| Spectrum Type          | STANDARD                                                                                                              | Sweep Width (Hz)       | 7507.28                           |                      |
|                        |                                                                                                                       | Solvent                | CHLOROFORM-d                      |                      |
|                        |                                                                                                                       | Temperature (degree C) | 25.100                            |                      |
|                        |                                                                                                                       | Number of Transients   | 38                                |                      |
|                        |                                                                                                                       | Points Count           | 32768                             |                      |
|                        |                                                                                                                       | Origin                 | spect                             |                      |
|                        |                                                                                                                       | Pulse Sequence         | zg30                              |                      |
|                        |                                                                                                                       | Spectrum Offset (Hz)   | 3491.4070                         |                      |

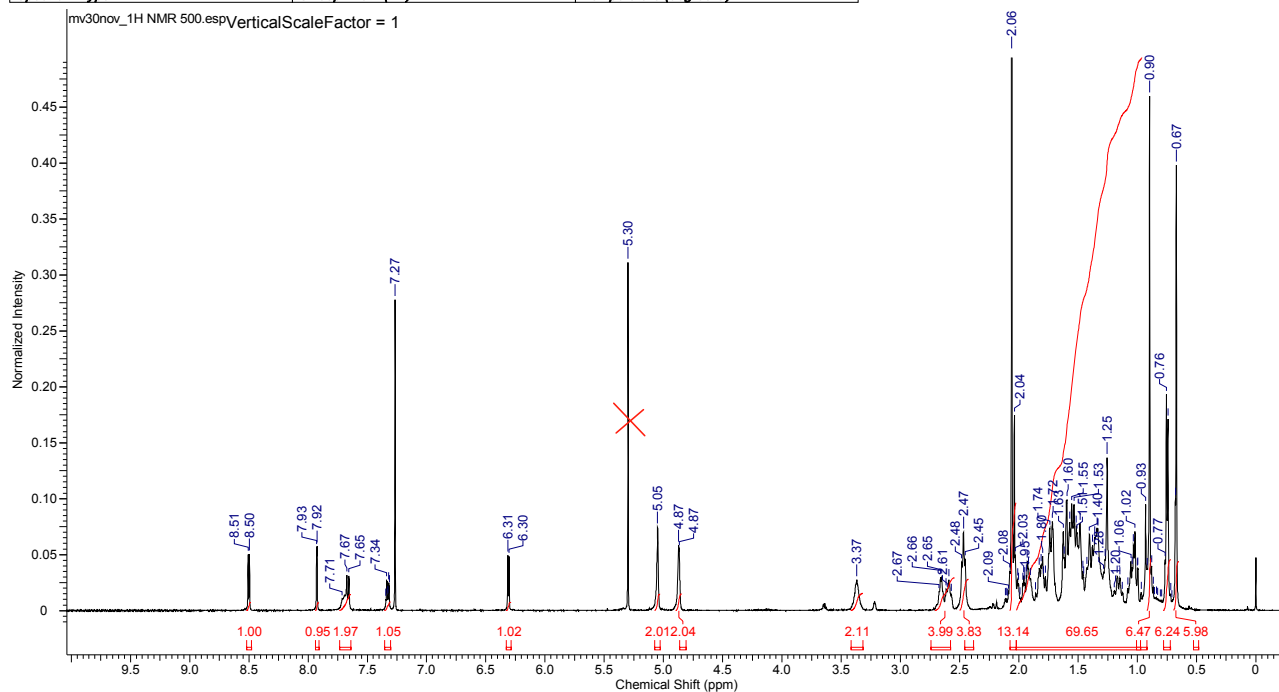**Compound 61 (MV30): <sup>13</sup>C NMR spectrum (125 MHz).**

2/25/2014 5:13:20 PM

| Number of Nuclei 0 C's |                                                                                                                       |                        |                                   |                      |
|------------------------|-----------------------------------------------------------------------------------------------------------------------|------------------------|-----------------------------------|----------------------|
| Acquisition Time (sec) | 0.5505                                                                                                                | Comment                | 5 mm BBO BB-1H/D Z-GRD Z8007/0118 |                      |
| Date Stamp             | 22 Feb 2014 09:29:52                                                                                                  |                        | Date                              | 22 Feb 2014 09:29:52 |
| File Name              | C:\Users\Dejan Opsenica\Documents\Radovi\Aminohinolinolski\DO152\ostali\Recenzija\Spektri NMR nov\mv30nov2\pdata\111r |                        |                                   |                      |
| Frequency (MHz)        | 125.79                                                                                                                | Nucleus                | <sup>13</sup> C                   |                      |
| Original Points Count  | 16384                                                                                                                 | Owner                  | nimsu                             |                      |
| Receiver Gain          | 2050.00                                                                                                               | SW(cyclical) (Hz)      | 29761.90                          |                      |
| Spectrum Type          | STANDARD                                                                                                              | Sweep Width (Hz)       | 29761.45                          |                      |
|                        |                                                                                                                       | Solvent                | CHLOROFORM-d                      |                      |
|                        |                                                                                                                       | Temperature (degree C) | 25.000                            |                      |
|                        |                                                                                                                       | Number of Transients   | 700                               |                      |
|                        |                                                                                                                       | Points Count           | 65536                             |                      |
|                        |                                                                                                                       | Origin                 | spect                             |                      |
|                        |                                                                                                                       | Pulse Sequence         | zgpg30                            |                      |
|                        |                                                                                                                       | Spectrum Offset (Hz)   | 13831.5049                        |                      |

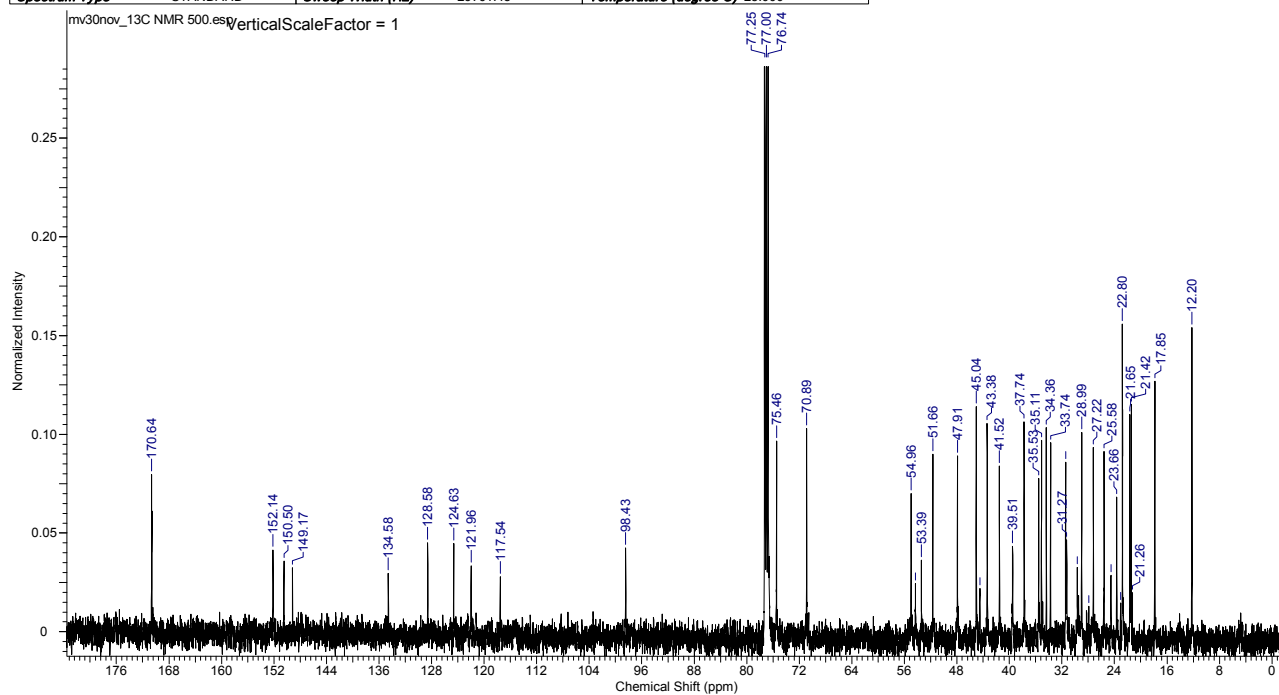

**Compound 62 (JK05):  $^1\text{H}$  NMR spectrum (200 MHz).** HPLC purity: method B: RT 1.788, area 98.83 %; method C: RT1=10.371, RT2=10,566, area 95.15 %; method D: RT1 4.947, RT2 5.036, area 96.07 %.

2/25/2014 5:35:11 PM

| Number of Nuclei 0 H's |                                                                                                                              |                |              |                        |                     |
|------------------------|------------------------------------------------------------------------------------------------------------------------------|----------------|--------------|------------------------|---------------------|
| Acquisition Time (sec) | 1.3913                                                                                                                       | Comment        | JK05         | Date                   | Sep 29 10           |
| File Name              | C:\Users\Dejan Ovsenica\Documents\Radovi\Aminohinolinski\DO152 i ostali\Recenzija\Spektri NMR_Star200 MHz\JK05\hjk05.fid.fid |                |              |                        |                     |
| Frequency (MHz)        | 199.97                                                                                                                       | Nucleus        | $^1\text{H}$ | Number of Transients   | 512                 |
| Points Count           | 8192                                                                                                                         | Pulse Sequence | s2pul        | Receiver Gain          | 9.00                |
| Spectrum Offset (Hz)   | 1688.4263                                                                                                                    | Spectrum Type  | STANDARD     | Sweep Width (Hz)       | 4600.00             |
|                        |                                                                                                                              |                |              | Solvent                | CHLOROFORM-d        |
|                        |                                                                                                                              |                |              | Temperature (degree C) | AMBIENT TEMPERATURE |

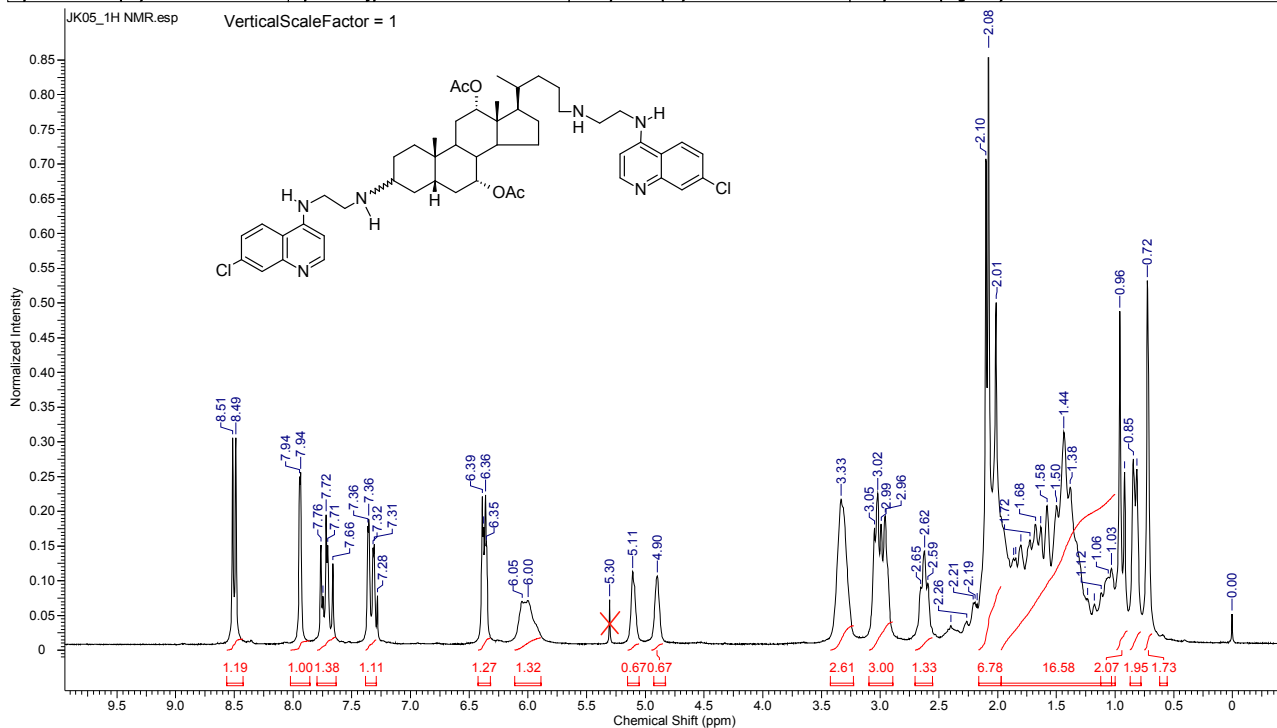

**Compound 62 (JK05):  $^{13}\text{C}$  NMR spectrum (50 MHz).**

2/25/2014 5:37:17 PM

| Number of Nuclei 0 C's |                                                                                                                              |                |                 |                        |                     |
|------------------------|------------------------------------------------------------------------------------------------------------------------------|----------------|-----------------|------------------------|---------------------|
| Acquisition Time (sec) | 1.0667                                                                                                                       | Comment        | JK05            | Date                   | Sep 29 10           |
| File Name              | C:\Users\Dejan Ovsenica\Documents\Radovi\Aminohinolinski\DO152 i ostali\Recenzija\Spektri NMR_Star200 MHz\JK05\cjk05.fid.fid |                |                 |                        |                     |
| Frequency (MHz)        | 50.29                                                                                                                        | Nucleus        | $^{13}\text{C}$ | Number of Transients   | 16984               |
| Points Count           | 16384                                                                                                                        | Pulse Sequence | s2pul           | Receiver Gain          | 25.00               |
| Spectrum Offset (Hz)   | 4814.6650                                                                                                                    | Spectrum Type  | STANDARD        | Sweep Width (Hz)       | 15000.00            |
|                        |                                                                                                                              |                |                 | Solvent                | CHLOROFORM-d        |
|                        |                                                                                                                              |                |                 | Temperature (degree C) | AMBIENT TEMPERATURE |

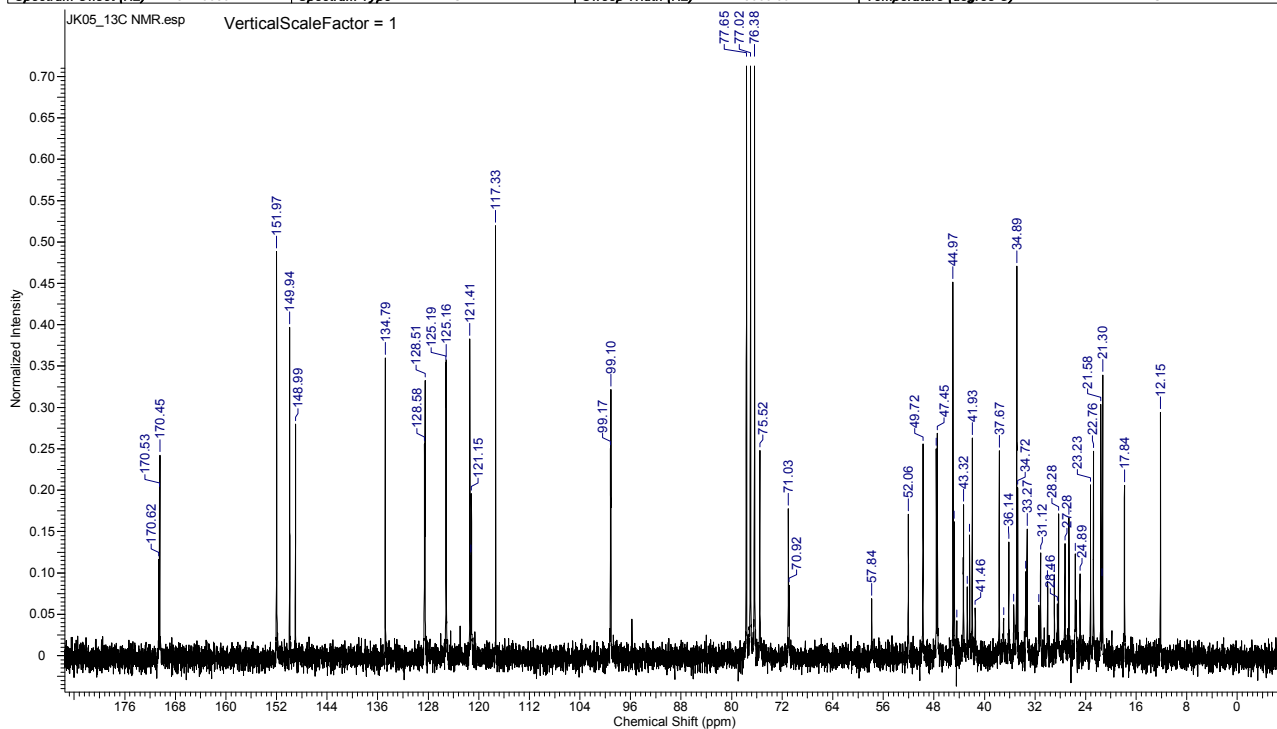

Compound 62 (JK05): <sup>1</sup>H NMR spectrum (500 MHz).

2/25/2014 5:38:33 PM

| Number of Nuclei 0 H's |                                                                                                                         |                   |                                   |                        |                      |
|------------------------|-------------------------------------------------------------------------------------------------------------------------|-------------------|-----------------------------------|------------------------|----------------------|
| Acquisition Time (sec) | 2.1823                                                                                                                  | Comment           | 5 mm BBO BB-1H/D Z-GRD Z8007/0118 | Date                   | 21 Feb 2014 10:33:52 |
| Date Stamp             | 21 Feb 2014 10:33:52                                                                                                    |                   |                                   |                        |                      |
| File Name              | C:\Users\Dejan Opsenica\Documents\Radovi\Aminohinoliniski\DO152 i ostali\Recenzija\Spektri NMR nov\jk05nov\1\pdata\1\1r |                   |                                   |                        |                      |
| Frequency (MHz)        | 500.26                                                                                                                  | Nucleus           | 1H                                | Number of Transients   | 16                   |
| Original Points Count  | 16384                                                                                                                   | Owner             | nimsu                             | Points Count           | 32768                |
| Receiver Gain          | 362.00                                                                                                                  | SW(cyclical) (Hz) | 7507.51                           | Solvent                | CHLOROFORM-d         |
| Spectrum Type          | STANDARD                                                                                                                | Sweep Width (Hz)  | 7507.28                           | Temperature (degree C) | 25.000               |
|                        |                                                                                                                         |                   |                                   | Spectrum Offset (Hz)   | 3493.8381            |

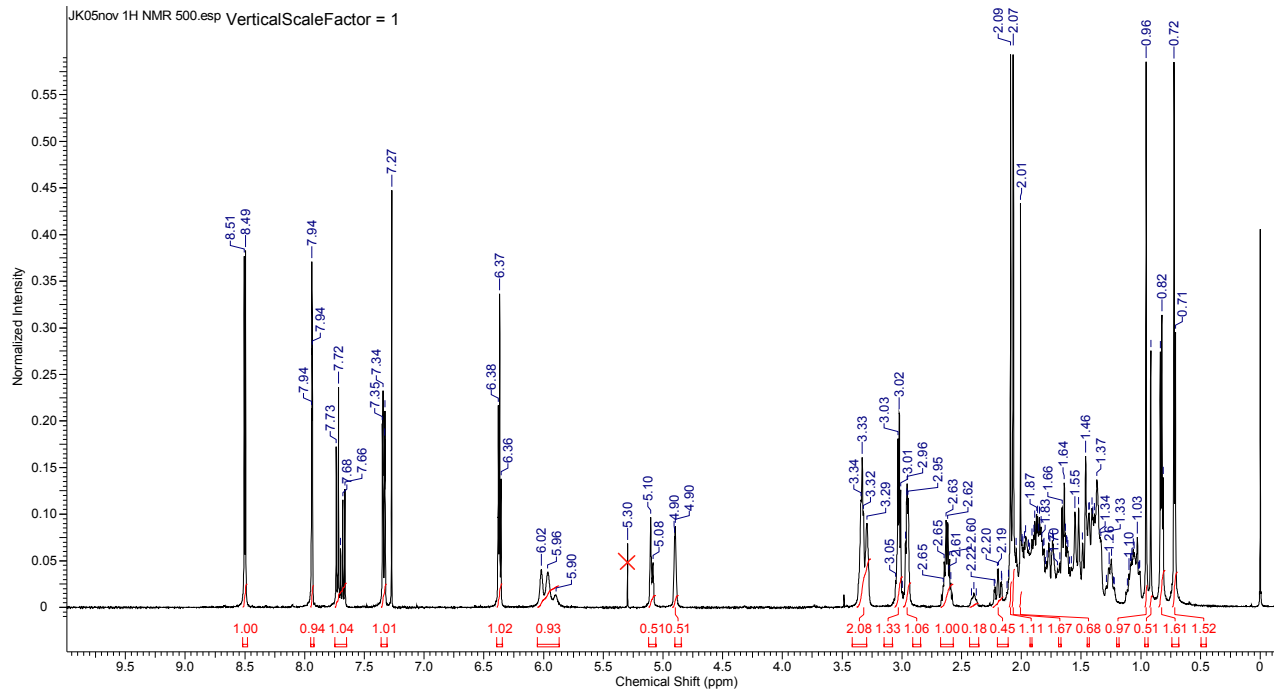Compound 62 (JK05): <sup>13</sup>C NMR spectrum (125 MHz).

3/1/2014 11:39:51 PM

| Number of Nuclei 0 C's |                                                                                                                         |                   |                                   |                        |                      |
|------------------------|-------------------------------------------------------------------------------------------------------------------------|-------------------|-----------------------------------|------------------------|----------------------|
| Acquisition Time (sec) | 0.5505                                                                                                                  | Comment           | 5 mm BBO BB-1H/D Z-GRD Z8007/0118 | Date                   | 21 Feb 2014 10:12:32 |
| Date Stamp             | 21 Feb 2014 10:12:32                                                                                                    |                   |                                   |                        |                      |
| File Name              | C:\Users\Dejan Opsenica\Documents\Radovi\Aminohinoliniski\DO152 i ostali\Recenzija\Spektri NMR nov\jk05nov\2\pdata\1\1r |                   |                                   |                        |                      |
| Frequency (MHz)        | 125.79                                                                                                                  | Nucleus           | 13C                               | Number of Transients   | 224                  |
| Original Points Count  | 16384                                                                                                                   | Owner             | nimsu                             | Points Count           | 65536                |
| Receiver Gain          | 2050.00                                                                                                                 | SW(cyclical) (Hz) | 29761.90                          | Solvent                | CHLOROFORM-d         |
| Spectrum Type          | STANDARD                                                                                                                | Sweep Width (Hz)  | 29761.45                          | Temperature (degree C) | 25.100               |
|                        |                                                                                                                         |                   |                                   | Spectrum Offset (Hz)   | 13830.0361           |

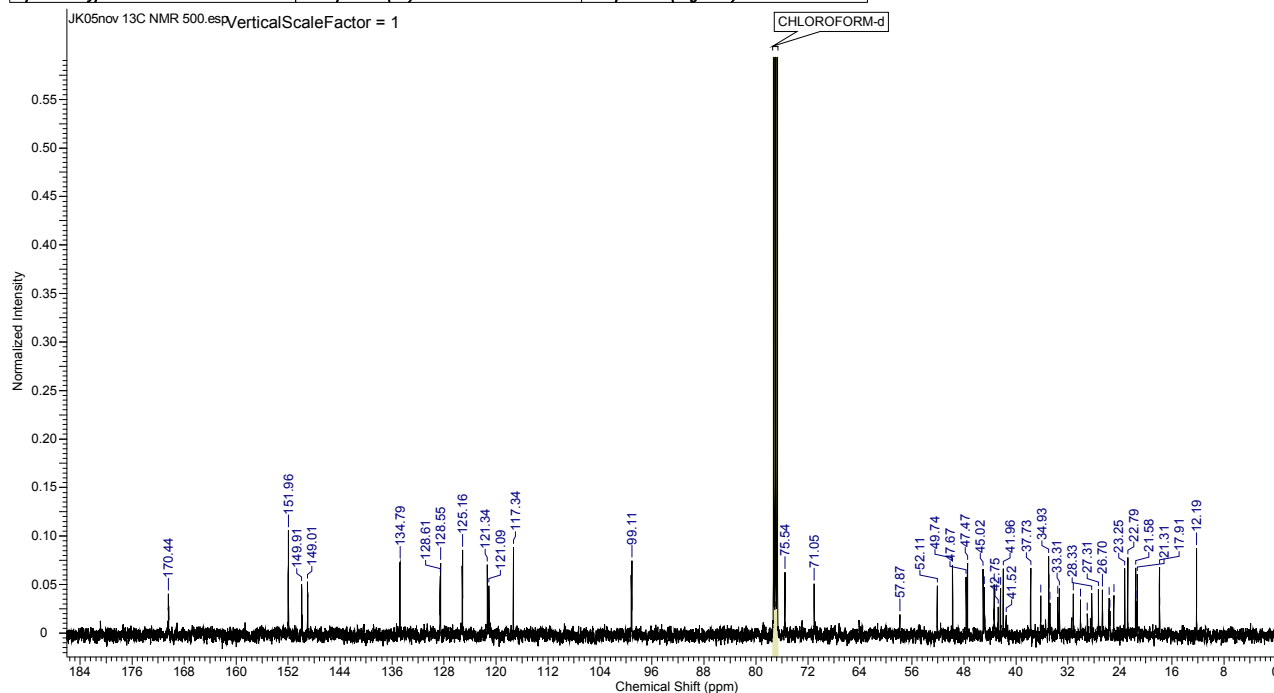



**Compound 63 (ZS09):  $^1\text{H}$  NMR spectrum (500 MHz).** HPLC purity: method C: RT1 5.533, RT2 8.731, area 95.07 %; method D: RT1 5.495, RT2 5.495, area 99.55 %.

2/26/2014 7:36:16 PM

| Number of Nuclei 0 H's |                                                                                                                                    |                        |                      |                      |
|------------------------|------------------------------------------------------------------------------------------------------------------------------------|------------------------|----------------------|----------------------|
| Acquisition Time (sec) | 2.6477                                                                                                                             | Date                   | 23 Mar 2012 08:34:24 |                      |
| File Name              | C:\Users\Dejan Osenica\Documents\Radovi\Aminohinoliniski\DO152 i ostali\Recenzijal\Spektri NMR_ Stari\500 MHz\ZSAA014\1\pdata\111r |                        | Date Stamp           | 23 Mar 2012 08:34:24 |
| Frequency (MHz)        | 500.26                                                                                                                             | Nucleus                | $^1\text{H}$         |                      |
| Original Points Count  | 16384                                                                                                                              | Owner                  | nmsu                 |                      |
| Receiver Gain          | 322.00                                                                                                                             | SW(cyclical) (Hz)      | 6188.12              |                      |
| Spectrum Type          | STANDARD                                                                                                                           | Sweep Width (Hz)       | 6187.93              |                      |
|                        |                                                                                                                                    | Number of Transients   | 16                   |                      |
|                        |                                                                                                                                    | Points Count           | 32768                |                      |
|                        |                                                                                                                                    | Solvent                | METHANOL-d4          |                      |
|                        |                                                                                                                                    | Temperature (degree C) | 25.000               |                      |
|                        |                                                                                                                                    | Origin                 | spect                |                      |
|                        |                                                                                                                                    | Pulse Sequence         | zq30                 |                      |
|                        |                                                                                                                                    | Spectrum Offset (Hz)   | 2741.7690            |                      |

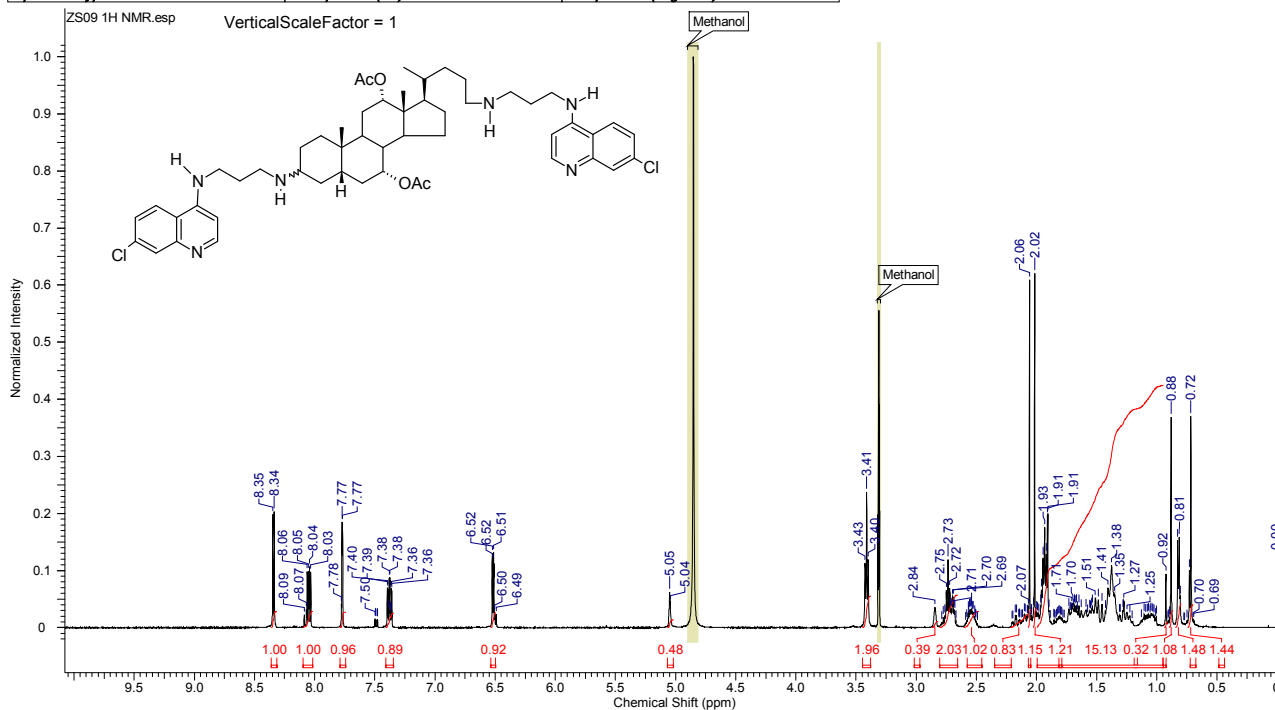

**Compound 63 (ZS09):  $^{13}\text{C}$  NMR spectrum (125 MHz).**

2/25/2014 5:47:51 PM

| Number of Nuclei 0 C's |                                                                                                                                    |                        |                      |                      |
|------------------------|------------------------------------------------------------------------------------------------------------------------------------|------------------------|----------------------|----------------------|
| Acquisition Time (sec) | 0.5505                                                                                                                             | Date                   | 23 Mar 2012 08:40:48 |                      |
| File Name              | C:\Users\Dejan Osenica\Documents\Radovi\Aminohinoliniski\DO152 i ostali\Recenzijal\Spektri NMR_ Stari\500 MHz\ZSAA014\2\pdata\111r |                        | Date Stamp           | 23 Mar 2012 08:40:48 |
| Frequency (MHz)        | 125.79                                                                                                                             | Nucleus                | $^{13}\text{C}$      |                      |
| Original Points Count  | 16384                                                                                                                              | Owner                  | nmsu                 |                      |
| Receiver Gain          | 1030.00                                                                                                                            | SW(cyclical) (Hz)      | 29761.90             |                      |
| Spectrum Type          | STANDARD                                                                                                                           | Sweep Width (Hz)       | 29761.00             |                      |
|                        |                                                                                                                                    | Number of Transients   | 432                  |                      |
|                        |                                                                                                                                    | Points Count           | 32768                |                      |
|                        |                                                                                                                                    | Solvent                | METHANOL-d4          |                      |
|                        |                                                                                                                                    | Temperature (degree C) | 25.000               |                      |
|                        |                                                                                                                                    | Origin                 | spect                |                      |
|                        |                                                                                                                                    | Pulse Sequence         | zqpg30               |                      |
|                        |                                                                                                                                    | Spectrum Offset (Hz)   | 14030.4600           |                      |

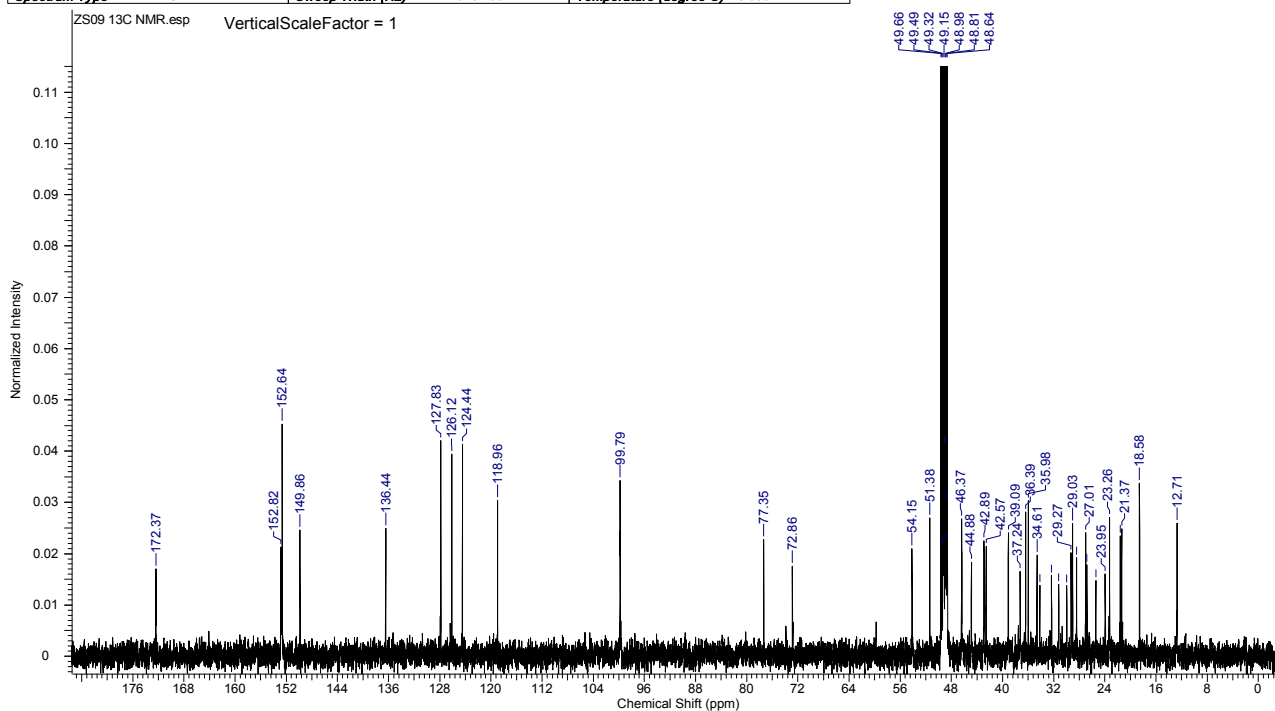

**Compound 64 (DOZS14):  $^1\text{H}$  NMR spectrum (500 MHz).** HPLC purity: method C: RT 8.807, area 97.79 %; method D: RT 5.135, area 99.23 %.

2/26/2014 7:38:59 PM

| Number of Nuclei 0 H's |                                                                                                                                    |                   |                      |                        |             |                      |           |
|------------------------|------------------------------------------------------------------------------------------------------------------------------------|-------------------|----------------------|------------------------|-------------|----------------------|-----------|
| Acquisition Time (sec) | 3.1261                                                                                                                             | Date              | 20 May 2011 14:56:32 |                        |             |                      |           |
| File Name              | C:\Users\Dejan Ovsenical\Documents\Radovi\Aminohinoliniski\DO152 i ostali\Recenzijal\Spektri NMR_ Stari\500 MHz\DOZS14\1\data\111r |                   | Date Stamp           | 20 May 2011 14:56:32   |             |                      |           |
| Frequency (MHz)        | 500.26                                                                                                                             | Nucleus           | $^1\text{H}$         | Number of Transients   | 16          | Origin               | spect     |
| Original Points Count  | 16384                                                                                                                              | Owner             | nmsru                | Points Count           | 32768       | Pulse Sequence       | zq30      |
| Receiver Gain          | 114.00                                                                                                                             | SW(cyclical) (Hz) | 5241.09              | Solvent                | METHANOL-d4 | Spectrum Offset (Hz) | 2131.7581 |
| Spectrum Type          | STANDARD                                                                                                                           | Sweep Width (Hz)  | 5240.93              | Temperature (degree C) | 25.000      |                      |           |

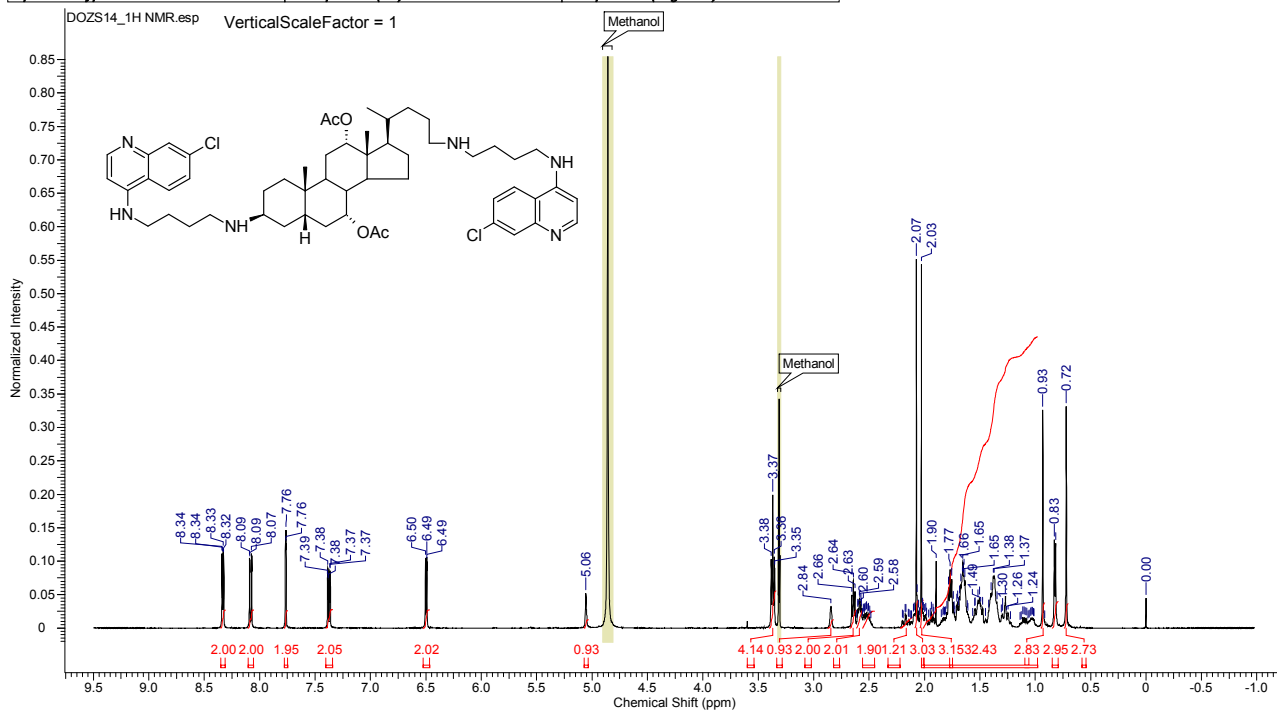

**Compound 64 (DOZS14):  $^{13}\text{C}$  NMR spectrum (125 MHz).**

2/25/2014 6:17:56 PM

| Number of Nuclei 0 C's |                                                                                                                                    |                   |                      |                        |             |                      |            |
|------------------------|------------------------------------------------------------------------------------------------------------------------------------|-------------------|----------------------|------------------------|-------------|----------------------|------------|
| Acquisition Time (sec) | 0.5505                                                                                                                             | Date              | 20 May 2011 15:05:04 |                        |             |                      |            |
| File Name              | C:\Users\Dejan Ovsenical\Documents\Radovi\Aminohinoliniski\DO152 i ostali\Recenzijal\Spektri NMR_ Stari\500 MHz\DOZS14\2\data\111r |                   | Date Stamp           | 20 May 2011 15:05:04   |             |                      |            |
| Frequency (MHz)        | 125.79                                                                                                                             | Nucleus           | $^{13}\text{C}$      | Number of Transients   | 605         | Origin               | spect      |
| Original Points Count  | 16384                                                                                                                              | Owner             | nmsru                | Points Count           | 32768       | Pulse Sequence       | zqpg30     |
| Receiver Gain          | 2050.00                                                                                                                            | SW(cyclical) (Hz) | 29761.90             | Solvent                | METHANOL-d4 | Spectrum Offset (Hz) | 14029.8936 |
| Spectrum Type          | STANDARD                                                                                                                           | Sweep Width (Hz)  | 29761.00             | Temperature (degree C) | 25.000      |                      |            |

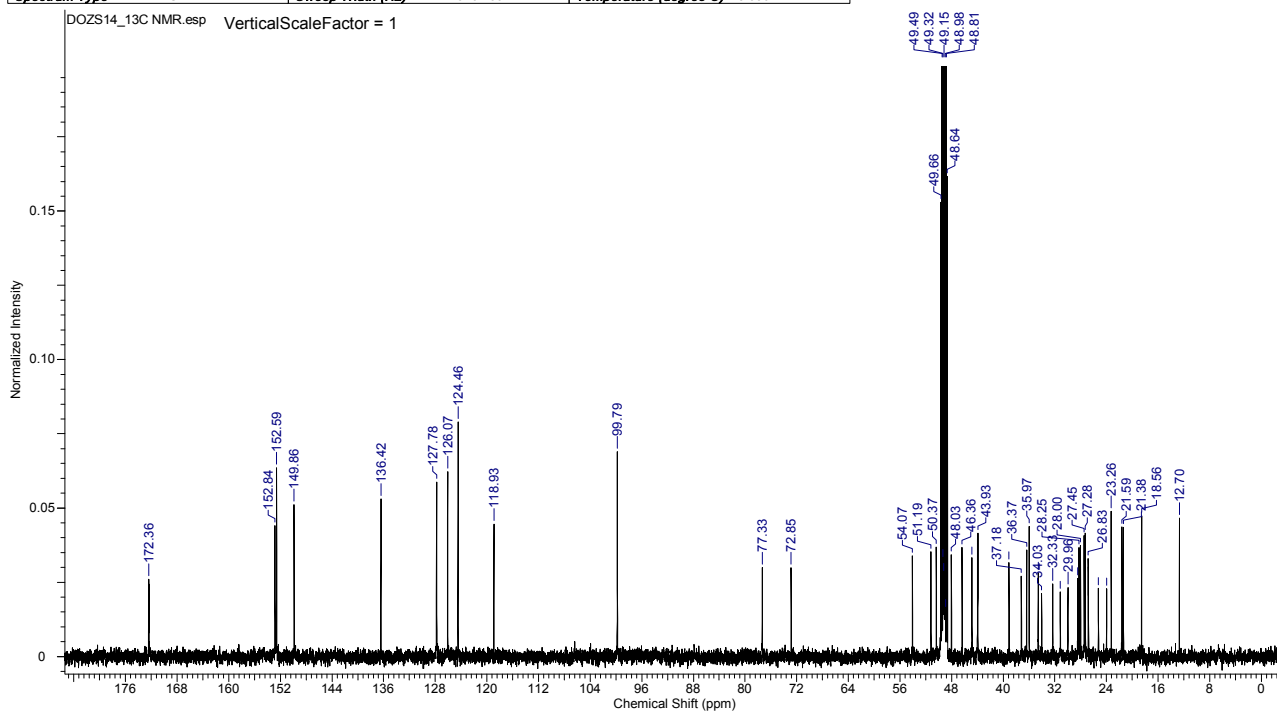

**Compound 65 (DOJK09-G): <sup>1</sup>H NMR spectrum (500 MHz).** HPLC purity: method C: RT 11.422, area 97.88 %; method D: RT 5.150, area 99.24.

2/25/2014 6:23:48 PM

| Number of Nuclei 0 H's |                                                                                                                                   |                        |                      |                      |
|------------------------|-----------------------------------------------------------------------------------------------------------------------------------|------------------------|----------------------|----------------------|
| Acquisition Time (sec) | 2.9797                                                                                                                            | Date                   | 02 Jun 2011 09:38:40 |                      |
| File Name              | C:\Users\Dejan Ospenica\Documents\Radovi\Aminohinoliniski\DO152 i ostali\Recenzija\Spektri NMR_ Stari\500 MHz\DOJK09-G1\pdata\11r |                        | Date Stamp           | 02 Jun 2011 09:38:40 |
| Frequency (MHz)        | 500.26                                                                                                                            | Nucleus                | <sup>1</sup> H       |                      |
| Original Points Count  | 16384                                                                                                                             | Owner                  | nmsru                |                      |
| Receiver Gain          | 144.00                                                                                                                            | SW(cyclical) (Hz)      | 5498.53              |                      |
| Spectrum Type          | STANDARD                                                                                                                          | Sweep Width (Hz)       | 5498.37              |                      |
|                        |                                                                                                                                   | Number of Transients   | 16                   |                      |
|                        |                                                                                                                                   | Points Count           | 32768                |                      |
|                        |                                                                                                                                   | Solvent                | METHANOL-d4          |                      |
|                        |                                                                                                                                   | Temperature (degree C) | 25.000               |                      |
|                        |                                                                                                                                   | Origin                 | spect                |                      |
|                        |                                                                                                                                   | Pulse Sequence         | zg30                 |                      |
|                        |                                                                                                                                   | Spectrum Offset (Hz)   | 1989.5295            |                      |

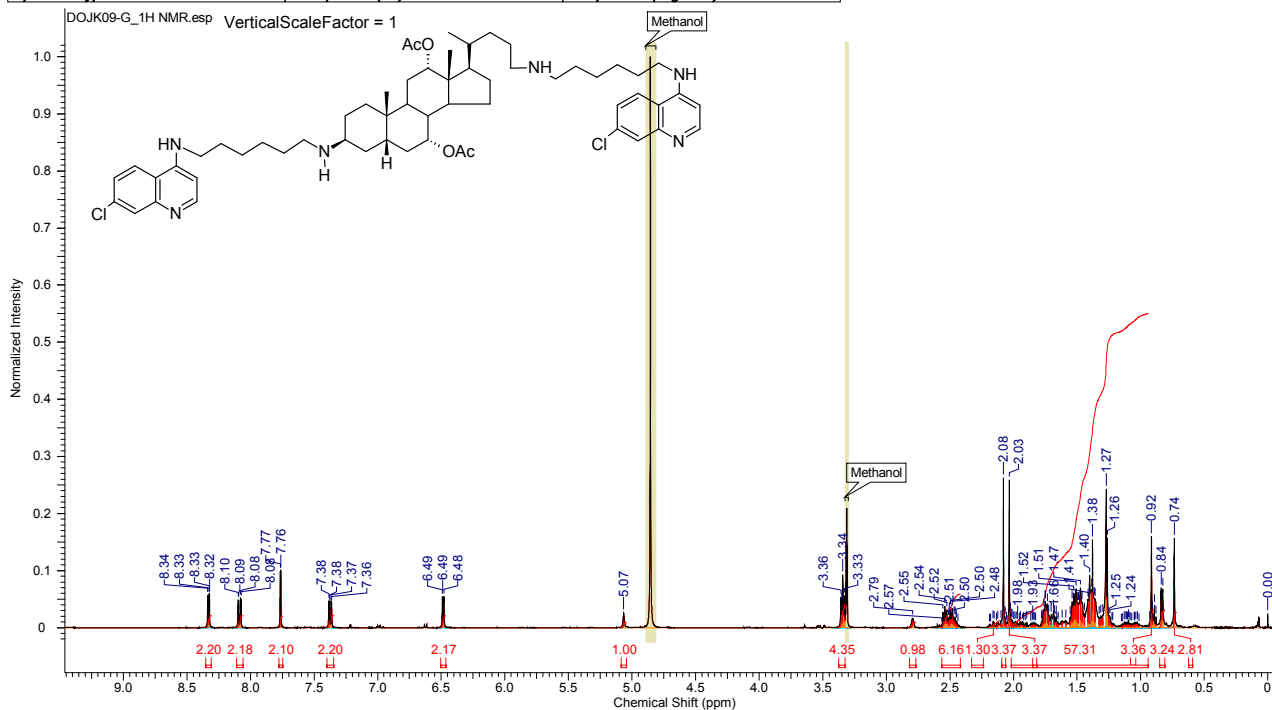

**Compound 65 (DOJK09-G): <sup>13</sup>C NMR spectrum (125 MHz).**

2/25/2014 6:25:34 PM

| Number of Nuclei 0 C's |                                                                                                                                   |                        |                      |                      |
|------------------------|-----------------------------------------------------------------------------------------------------------------------------------|------------------------|----------------------|----------------------|
| Acquisition Time (sec) | 0.5505                                                                                                                            | Date                   | 02 Jun 2011 09:42:56 |                      |
| File Name              | C:\Users\Dejan Ospenica\Documents\Radovi\Aminohinoliniski\DO152 i ostali\Recenzija\Spektri NMR_ Stari\500 MHz\DOJK09-G2\pdata\11r |                        | Date Stamp           | 02 Jun 2011 09:42:56 |
| Frequency (MHz)        | 125.79                                                                                                                            | Nucleus                | <sup>13</sup> C      |                      |
| Original Points Count  | 16384                                                                                                                             | Owner                  | nmsru                |                      |
| Receiver Gain          | 2050.00                                                                                                                           | SW(cyclical) (Hz)      | 29761.90             |                      |
| Spectrum Type          | STANDARD                                                                                                                          | Sweep Width (Hz)       | 29761.00             |                      |
|                        |                                                                                                                                   | Number of Transients   | 760                  |                      |
|                        |                                                                                                                                   | Points Count           | 32768                |                      |
|                        |                                                                                                                                   | Solvent                | METHANOL-d4          |                      |
|                        |                                                                                                                                   | Temperature (degree C) | 25.100               |                      |
|                        |                                                                                                                                   | Origin                 | spect                |                      |
|                        |                                                                                                                                   | Pulse Sequence         | zgpg30               |                      |
|                        |                                                                                                                                   | Spectrum Offset (Hz)   | 14011.5469           |                      |

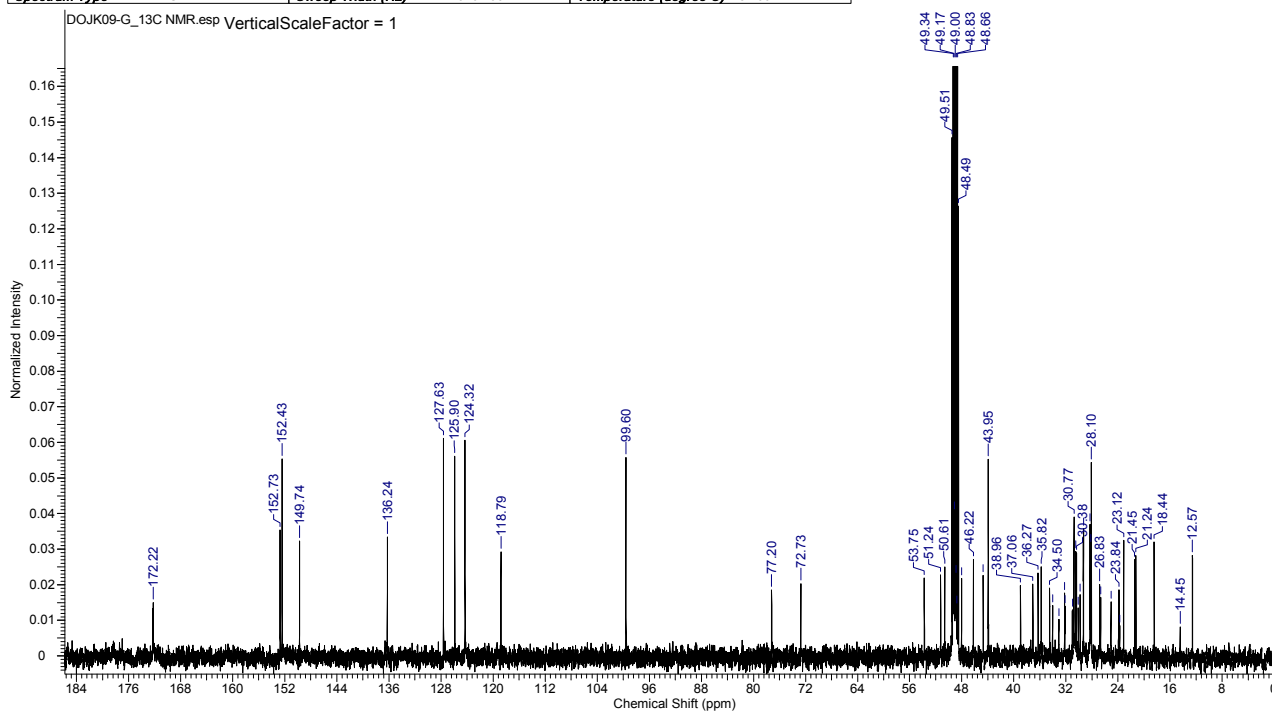

**Compound 66 (DOJK09-D):**  $^1\text{H}$  NMR spectrum (500 MHz). HPLC purity: method C: RT 9.878, area 99.98 % ; method D: RT 5.208, area 96.76 %.

2/25/2014 6:27:19 PM

| Number of Nuclei 0 H's |                                                                                                                                 |                   |                      |                        |                      |
|------------------------|---------------------------------------------------------------------------------------------------------------------------------|-------------------|----------------------|------------------------|----------------------|
| Acquisition Time (sec) | 2.7394                                                                                                                          | Date              | 08 Jun 2011 09:17:20 | Date Stamp             | 08 Jun 2011 09:17:20 |
| File Name              | C:\Users\Dejan Ovsenica\Documents\Radovi\Aminohinoliniski\DO152 i ostali\Recenzija\Spektri NMR_Star500 MHz\DOJK09-D\1\pdata\11r |                   |                      | Origin                 | spect                |
| Frequency (MHz)        | 500.26                                                                                                                          | Nucleus           | $^1\text{H}$         | Number of Transients   | 32                   |
| Original Points Count  | 16384                                                                                                                           | Owner             | nmsu                 | Points Count           | 32768                |
| Receiver Gain          | 256.00                                                                                                                          | SW(cyclical) (Hz) | 5980.86              | Solvent                | METHANOL-d4          |
| Spectrum Type          | STANDARD                                                                                                                        | Sweep Width (Hz)  | 5980.68              | Temperature (degree C) | 25.000               |
|                        |                                                                                                                                 |                   |                      | Pulse Sequence         | zg30                 |
|                        |                                                                                                                                 |                   |                      | Spectrum Offset (Hz)   | 2501.1787            |

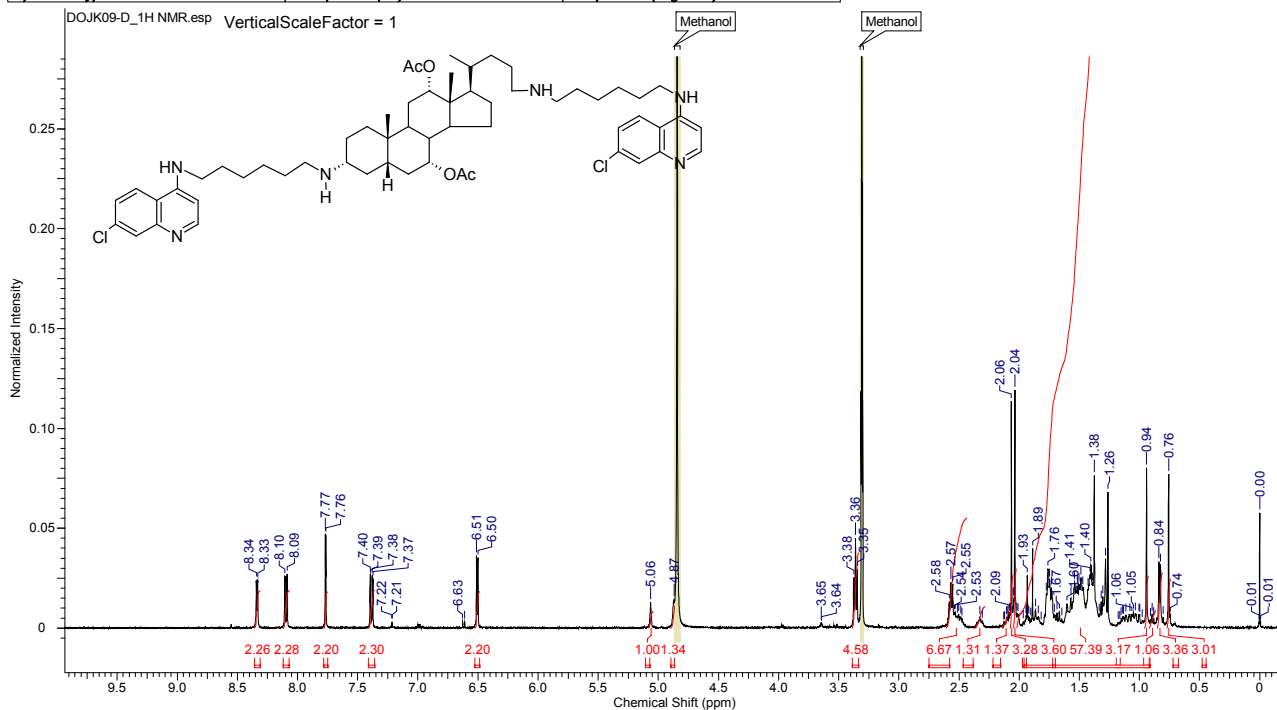

**Compound 66 (DOJK09-D):**  $^{13}\text{C}$  NMR spectrum (125 MHz).

2/25/2014 6:29:08 PM

| Number of Nuclei 0 C's |                                                                                                                                 |                   |                      |                        |                      |
|------------------------|---------------------------------------------------------------------------------------------------------------------------------|-------------------|----------------------|------------------------|----------------------|
| Acquisition Time (sec) | 0.5505                                                                                                                          | Date              | 08 Jun 2011 09:53:36 | Date Stamp             | 08 Jun 2011 09:53:36 |
| File Name              | C:\Users\Dejan Ovsenica\Documents\Radovi\Aminohinoliniski\DO152 i ostali\Recenzija\Spektri NMR_Star500 MHz\DOJK09-D\6\pdata\11r |                   |                      | Origin                 | spect                |
| Frequency (MHz)        | 125.79                                                                                                                          | Nucleus           | $^{13}\text{C}$      | Number of Transients   | 2159                 |
| Original Points Count  | 16384                                                                                                                           | Owner             | nmsu                 | Points Count           | 32768                |
| Receiver Gain          | 1030.00                                                                                                                         | SW(cyclical) (Hz) | 29761.90             | Solvent                | METHANOL-d4          |
| Spectrum Type          | STANDARD                                                                                                                        | Sweep Width (Hz)  | 29761.00             | Temperature (degree C) | 25.000               |
|                        |                                                                                                                                 |                   |                      | Pulse Sequence         | zgpg30               |
|                        |                                                                                                                                 |                   |                      | Spectrum Offset (Hz)   | 14013.2061           |

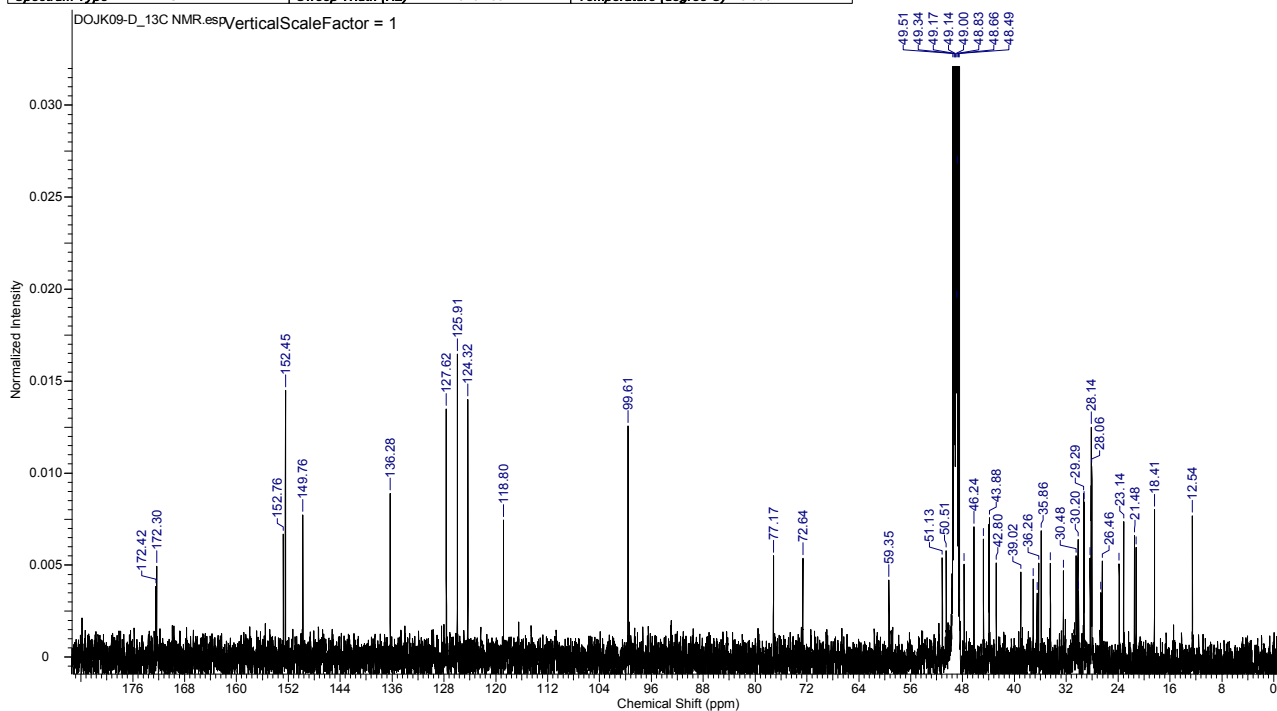

**Compound 67 (DOZS15):**  $^1\text{H}$  NMR spectrum (500 MHz). HPLC purity: method C: RT 8.674, area 95.27 %; method D: RT 5.072, area 99.21 %.

2/26/2014 7:40:26 PM

| Number of Nuclei 0 H's |                                                                                                                                 |                   |                      |                        |             |                      |           |
|------------------------|---------------------------------------------------------------------------------------------------------------------------------|-------------------|----------------------|------------------------|-------------|----------------------|-----------|
| Acquisition Time (sec) | 3.2768                                                                                                                          | Date              | 27 May 2011 11:57:20 |                        |             |                      |           |
| File Name              | C:\Users\Dejan Ovsenica\Documents\Radovi\Aminohinoliniski\DO152 i ostali\Recenzija\Spektri NMR_ Stari\500 MHz\DOZS15\1\data\11r |                   | Date Stamp           | 27 May 2011 11:57:20   |             |                      |           |
| Frequency (MHz)        | 500.26                                                                                                                          | Nucleus           | $^1\text{H}$         | Number of Transients   | 16          | Origin               | spect     |
| Original Points Count  | 16384                                                                                                                           | Owner             | nmsru                | Points Count           | 32768       | Pulse Sequence       | zq30      |
| Receiver Gain          | 90.50                                                                                                                           | SW(cyclical) (Hz) | 5000.00              | Solvent                | METHANOL-d4 | Spectrum Offset (Hz) | 2126.2390 |
| Spectrum Type          | STANDARD                                                                                                                        | Sweep Width (Hz)  | 4999.85              | Temperature (degree C) | 25.000      |                      |           |

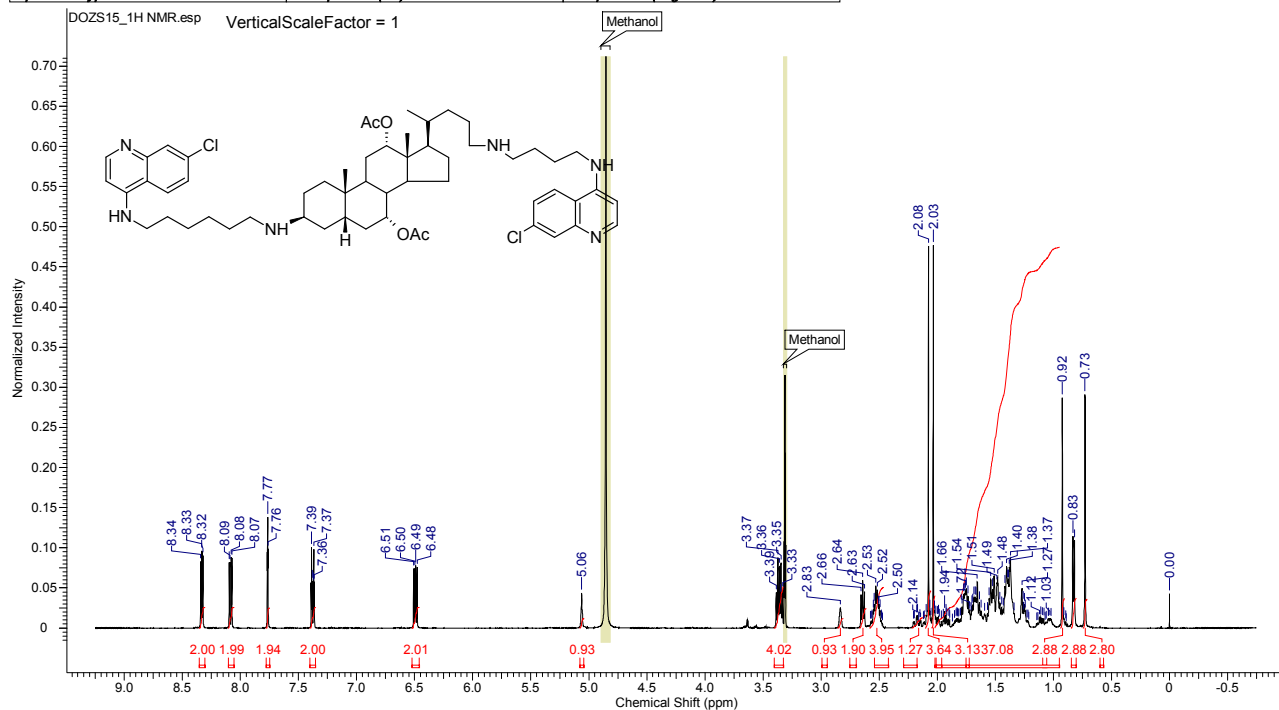

**Compound 67 (DOZS15):**  $^{13}\text{C}$  NMR spectrum (125 MHz).

2/25/2014 6:32:47 PM

| Number of Nuclei 0 C's |                                                                                                                                 |                   |                      |                        |             |                      |            |
|------------------------|---------------------------------------------------------------------------------------------------------------------------------|-------------------|----------------------|------------------------|-------------|----------------------|------------|
| Acquisition Time (sec) | 0.5505                                                                                                                          | Date              | 27 May 2011 12:03:44 |                        |             |                      |            |
| File Name              | C:\Users\Dejan Ovsenica\Documents\Radovi\Aminohinoliniski\DO152 i ostali\Recenzija\Spektri NMR_ Stari\500 MHz\DOZS15\2\data\11r |                   | Date Stamp           | 27 May 2011 12:03:44   |             |                      |            |
| Frequency (MHz)        | 125.79                                                                                                                          | Nucleus           | $^{13}\text{C}$      | Number of Transients   | 716         | Origin               | spect      |
| Original Points Count  | 16384                                                                                                                           | Owner             | nmsru                | Points Count           | 32768       | Pulse Sequence       | zqpg30     |
| Receiver Gain          | 2050.00                                                                                                                         | SW(cyclical) (Hz) | 29761.90             | Solvent                | METHANOL-d4 | Spectrum Offset (Hz) | 13833.8447 |
| Spectrum Type          | STANDARD                                                                                                                        | Sweep Width (Hz)  | 29761.00             | Temperature (degree C) | 25.000      |                      |            |

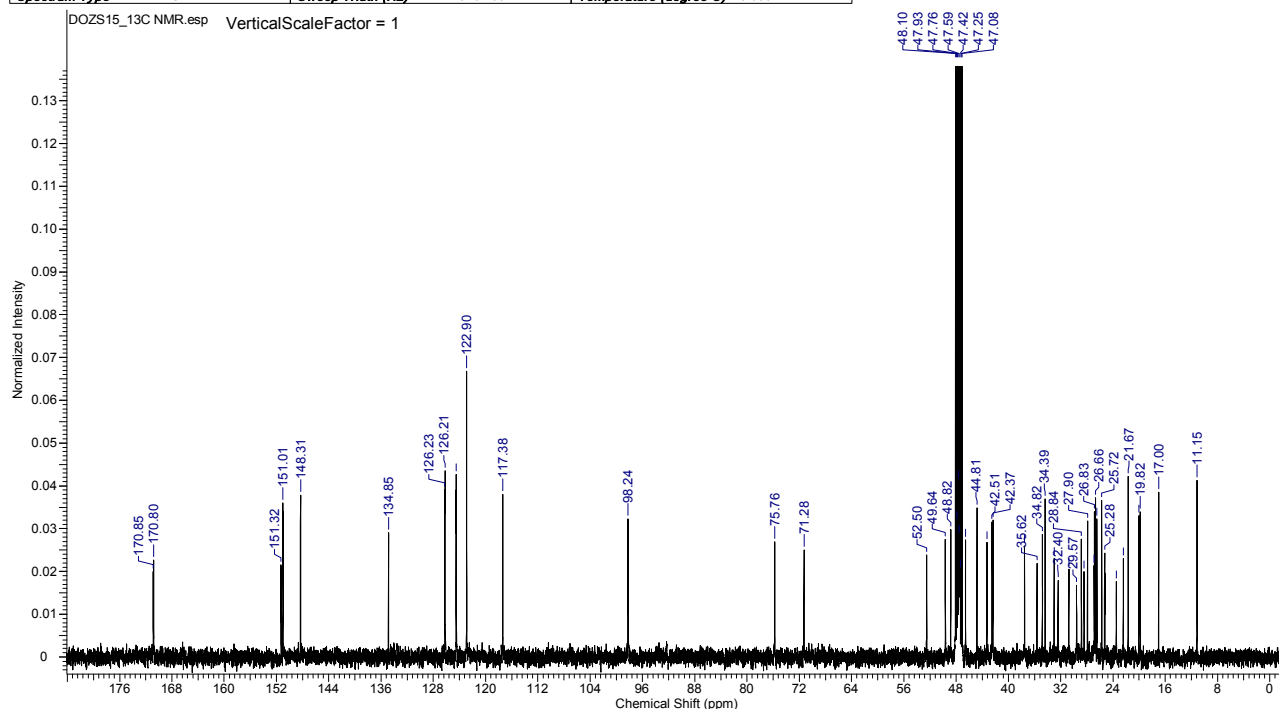

**Compound 68 (DOZS18):  $^1\text{H}$  NMR spectrum (500 MHz). HPLC purity: method C: RT 8.846, area 99.18 %; method D: RT 5.181, area 96.31 %.**

2/26/2014 7:41:43 PM

| Number of Nuclei 0 H's |                                                                                                                                  |                        |                                   |
|------------------------|----------------------------------------------------------------------------------------------------------------------------------|------------------------|-----------------------------------|
| Acquisition Time (sec) | 2.7394                                                                                                                           | Comment                | 5 mm BBO BB-1H/D Z-GRD Z8007/0118 |
| Date Stamp             | 06 Jun 2011 09:25:52                                                                                                             | Date                   | 06 Jun 2011 09:25:52              |
| File Name              | C:\Users\Dejan\Openical\Documents\Radovi\Aminohinoliniski\DO152\i ostali\Recenzija\Spektri NMR_Star500 MHz\DOZS15B\10\pdata1\11r |                        |                                   |
| Frequency (MHz)        | 500.26                                                                                                                           | Nucleus                | $^1\text{H}$                      |
| Original Points Count  | 16384                                                                                                                            | Owner                  | nmsru                             |
| Receiver Gain          | 256.00                                                                                                                           | SW(cyclical) (Hz)      | 5980.86                           |
| Spectrum Type          | STANDARD                                                                                                                         | Sweep Width (Hz)       | 5980.68                           |
|                        |                                                                                                                                  | Solvent                | METHANOL-d4                       |
|                        |                                                                                                                                  | Temperature (degree C) | 24.900                            |
|                        |                                                                                                                                  | Number of Transients   | 33                                |
|                        |                                                                                                                                  | Points Count           | 32768                             |
|                        |                                                                                                                                  | Origin                 | spect                             |
|                        |                                                                                                                                  | Pulse Sequence         | zg30                              |
|                        |                                                                                                                                  | Spectrum Offset (Hz)   | 2508.4824                         |

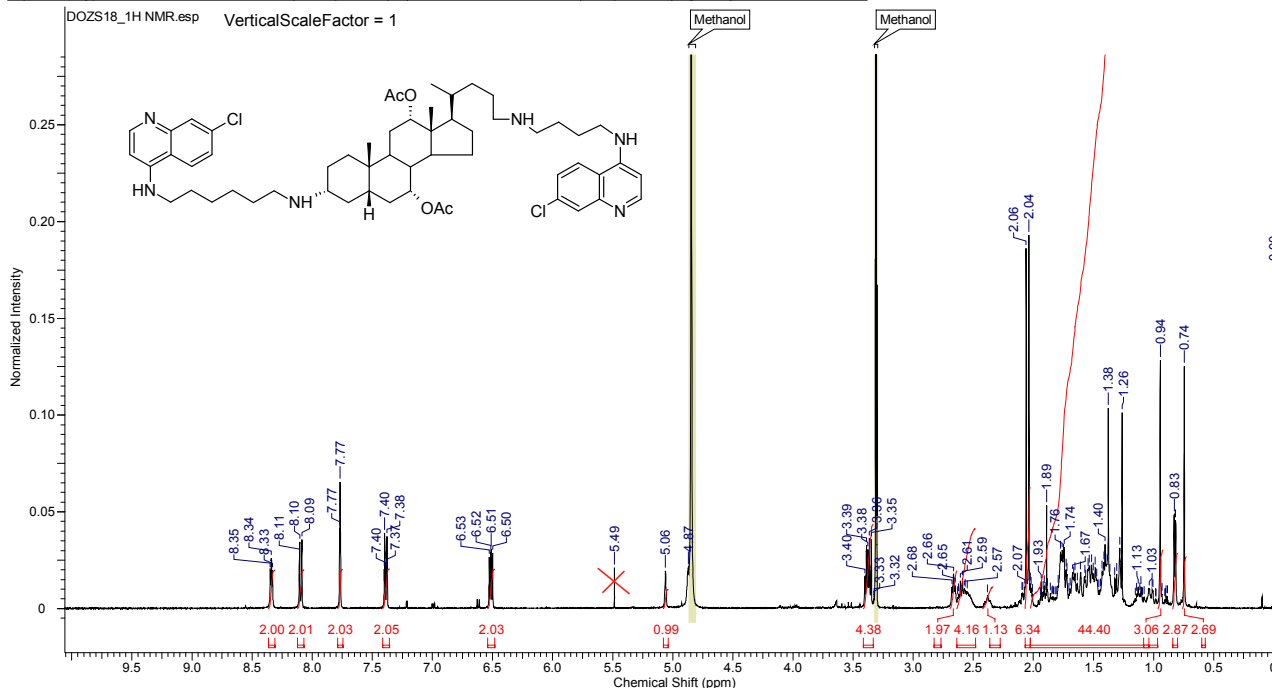

**Compound 68 (DOZS18):  $^{13}\text{C}$  NMR spectrum (125 MHz).**

2/25/2014 6:35:14 PM

| Number of Nuclei 0 C's |                                                                                                                                 |                        |                      |
|------------------------|---------------------------------------------------------------------------------------------------------------------------------|------------------------|----------------------|
| Acquisition Time (sec) | 0.5505                                                                                                                          | Date                   | 06 Jun 2011 09:49:20 |
| Date Stamp             | 06 Jun 2011 09:49:20                                                                                                            | Date Stamp             | 06 Jun 2011 09:49:20 |
| File Name              | C:\Users\Dejan\Openical\Documents\Radovi\Aminohinoliniski\DO152\i ostali\Recenzija\Spektri NMR_Star500 MHz\DOZS15B\6\pdata1\11r |                        |                      |
| Frequency (MHz)        | 125.79                                                                                                                          | Nucleus                | $^{13}\text{C}$      |
| Original Points Count  | 16384                                                                                                                           | Owner                  | nmsru                |
| Receiver Gain          | 1030.00                                                                                                                         | SW(cyclical) (Hz)      | 29761.90             |
| Spectrum Type          | STANDARD                                                                                                                        | Sweep Width (Hz)       | 29761.00             |
|                        |                                                                                                                                 | Solvent                | METHANOL-d4          |
|                        |                                                                                                                                 | Temperature (degree C) | 25.000               |
|                        |                                                                                                                                 | Number of Transients   | 2406                 |
|                        |                                                                                                                                 | Points Count           | 32768                |
|                        |                                                                                                                                 | Origin                 | spect                |
|                        |                                                                                                                                 | Pulse Sequence         | zgpg30               |
|                        |                                                                                                                                 | Spectrum Offset (Hz)   | 14012.9160           |

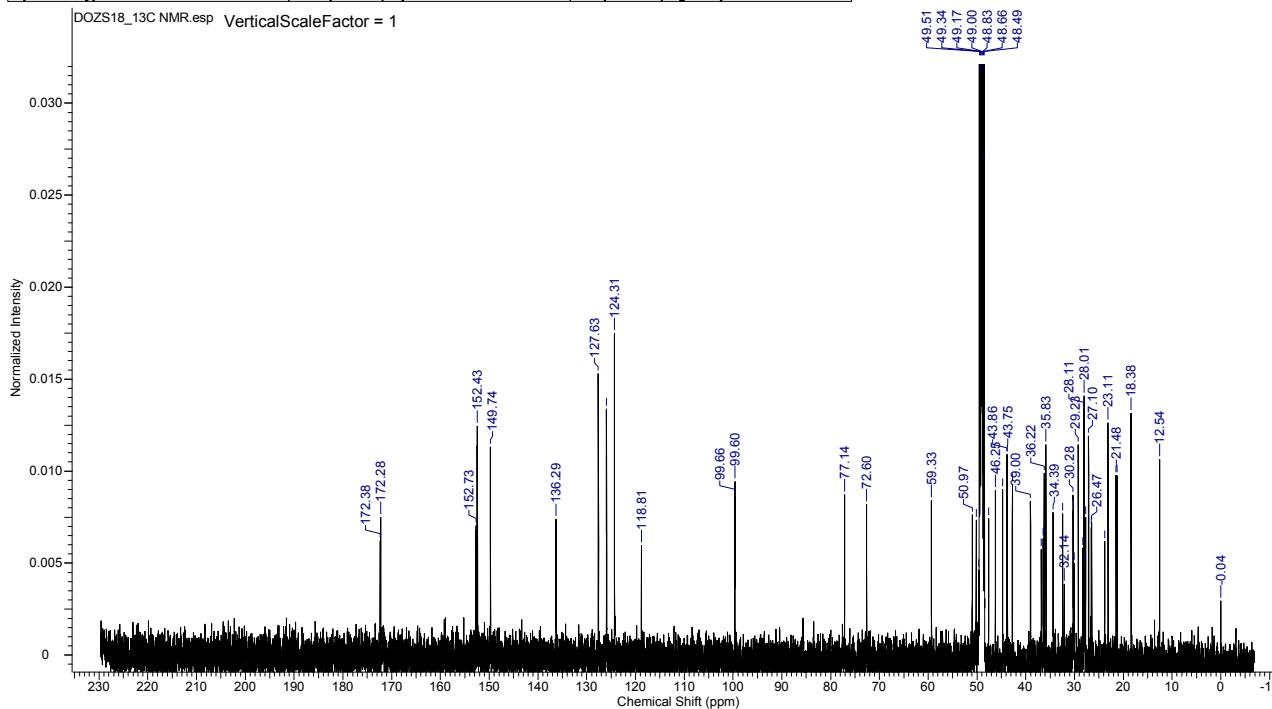

Supplement: jm500033r_si_001.pdf [file jm500033r_si_001.pdf]
